# Supplementary material for: Automated identification of energetically feasible mechanisms of complex reaction networks in heterogeneous catalysis: application to glycerol conversion on transition metals
Source: Royal Society of Chemistry journal article supplement (doi:10.1039/c3gc41386a), 2013-11-06
Supplement: c3gc41386a.xlsx [file c3gc41386a.xlsx]

## Sheet: Pt
This is the output from RING for pathways query. All reactions in a pathway are given together and all pathways are given one below the other. The second column is the enthalpy of reaction, and the third column is the activation barriers. The Max Ea in the pathway is given in the fourth
Results on Pt at 550K
Propane diol					Carbon Monoxide
molecule C(CO)(O)C satisfies constraints					molecule O=[C:] satisfies constraints
shortest path to the molecule is 4					shortest path to the molecule is 5
Pathways for C(CO)(O)C					Pathways for O=[C:]
C(CO)(CO)O.[{M}].[{M}]>>C(O_[{M}])(CO)CO_[{M}]	-36.8737	0			C(CO)(CO)O.[{M}].[{M}]>>C(O_[{M}])(CO)CO_[{M}]	-36.8737	0
C(O_[{M}])(CO)CO_[{M}].[{M}].[{M}]>>C(O_[{M}])(C[{M}])CO_[{M}].[{M}]O	-4.42321	134.871			C(O_[{M}])(CO)CO_[{M}].[{M}].[{M}]>>C(C(O_[{M}])CO_[{M}])([{M}])O.[{M}H]	-79.7489	20.8931
C(O_[{M}])(C[{M}])CO_[{M}].[{M}H]>>C(O_[{M}])(CO_[{M}])C.[{M}].[{M}]	29.2229	79.1437			C(C(O_[{M}])CO_[{M}])([{M}])O.[{M}].[{M}]>>C(C(O_[{M}])CO_[{M}])([{M}])([{M}])O.[{M}H]	-20.408	81.4208
C(O_[{M}])(CO_[{M}])C>>C(CO)(O)C.[{M}].[{M}]	38.1286	0			C(C(O_[{M}])CO_[{M}])([{M}])([{M}])O.[{M}].[{M}]>>C(C(CO_[{M}])([{M}])O)([{M}])([{M}])O.[{M}].[{M}H]	1.4391	103.705
					C(C(CO_[{M}])([{M}])O)([{M}])([{M}])O>>C(C(=O)CO_[{M}])([{M}])([{M}])O.[{M}H]	4.2424	57.6605
the above pathway is of length 4 and contains					C(C(=O)CO_[{M}])([{M}])([{M}])O>>C(=O)(C(=O)CO_[{M}])[{M}].[{M}H]	11.907	64.2521
rule OHadsorption2 occurs 1 times					C(=O)(C(=O)CO_[{M}])[{M}].[{M}].[{M}]>>C(=O)([{M}])[{M}].C(=O)(CO_[{M}])[{M}]	-119.788	74.2951
rule OHdesorption2 occurs 1 times					C(=O)([{M}])[{M}]>>O=[C:].[{M}].[{M}]	102.221	0
rule CHformation occurs 1 times
rule COScission occurs 1 times					the above pathway is of length 8 and contains
Max Ea is			134.871		rule OHadsorption2 occurs 1 times
					rule CHscission occurs 2 times
C(CO)(CO)O.[{M}].[{M}]>>C(O_[{M}])(CO)CO_[{M}]	-36.8737	0			rule CHscission2 occurs 1 times
C(O_[{M}])(CO)CO_[{M}].[{M}].[{M}]>>C(O_[{M}])(CO[{M}])CO_[{M}].[{M}H]	17.4241	68.9967			rule CCscission occurs 1 times
C(O_[{M}])(CO[{M}])CO_[{M}].[{M}].[{M}]>>C(O_[{M}])(C[{M}])CO_[{M}].O([{M}])[{M}]	-29.3914	155.673			rule CdoubleOFromCOH occurs 2 times
C(O_[{M}])(C[{M}])CO_[{M}].[{M}H]>>C(O_[{M}])(CO_[{M}])C.[{M}].[{M}]	29.2229	79.1437			rule CarbonMonoxideFormation occurs 1 times
C(O_[{M}])(CO_[{M}])C>>C(CO)(O)C.[{M}].[{M}]	38.1286	0			Max Ea is			103.705
the above pathway is of length 5 and contains					C(CO)(CO)O.[{M}].[{M}]>>C(O_[{M}])(CO)CO_[{M}]	-36.8737	0
rule OHadsorption2 occurs 1 times					C(O_[{M}])(CO)CO_[{M}].[{M}].[{M}]>>C(C(O_[{M}])CO_[{M}])([{M}])O.[{M}H]	-79.7489	20.8931
rule OHdesorption2 occurs 1 times					C(C(O_[{M}])CO_[{M}])([{M}])O.[{M}].[{M}]>>C(C([{M}])O)(CO_[{M}])([{M}])O.[{M}].[{M}H]	-7.20837	94.8845
rule OHscission occurs 1 times					C(C([{M}])O)(CO_[{M}])([{M}])O.[{M}].[{M}]>>C(C(CO_[{M}])([{M}])O)([{M}])([{M}])O.[{M}H]	-11.7605	90.2412
rule CHformation occurs 1 times					C(C(CO_[{M}])([{M}])O)([{M}])([{M}])O>>C(C(=O)CO_[{M}])([{M}])([{M}])O.[{M}H]	4.2424	57.6605
rule COScission occurs 1 times					C(C(=O)CO_[{M}])([{M}])([{M}])O>>C(=O)(C(=O)CO_[{M}])[{M}].[{M}H]	11.907	64.2521
Max Ea is			155.673		C(=O)(C(=O)CO_[{M}])[{M}].[{M}].[{M}]>>C(=O)([{M}])[{M}].C(=O)(CO_[{M}])[{M}]	-119.788	74.2951
					C(=O)([{M}])[{M}]>>O=[C:].[{M}].[{M}]	102.221	0
C(CO)(CO)O.[{M}].[{M}]>>C(O_[{M}])(CO)CO_[{M}]	-36.8737	0
C(O_[{M}])(CO)CO_[{M}].[{M}].[{M}]>>C(C(O_[{M}])CO_[{M}])([{M}])O.[{M}H]	-79.7489	20.8931			the above pathway is of length 8 and contains
C(C(O_[{M}])CO_[{M}])([{M}])O.[{M}].[{M}]>>C(C(O_[{M}])CO_[{M}])(O[{M}])[{M}].[{M}H]	38.8376	87.4123			rule OHadsorption2 occurs 1 times
C(C(O_[{M}])CO_[{M}])(O[{M}])[{M}].[{M}H]>>C(O_[{M}])(CO[{M}])CO_[{M}].[{M}].[{M}]	58.3355	104.181			rule CHscission occurs 2 times
C(O_[{M}])(CO[{M}])CO_[{M}].[{M}].[{M}]>>C(O_[{M}])(C[{M}])CO_[{M}].O([{M}])[{M}]	-29.3914	155.673			rule CHscission2 occurs 1 times
C(O_[{M}])(C[{M}])CO_[{M}].[{M}H]>>C(O_[{M}])(CO_[{M}])C.[{M}].[{M}]	29.2229	79.1437			rule CCscission occurs 1 times
C(O_[{M}])(CO_[{M}])C>>C(CO)(O)C.[{M}].[{M}]	38.1286	0			rule CdoubleOFromCOH occurs 2 times
					rule CarbonMonoxideFormation occurs 1 times
the above pathway is of length 7 and contains					Max Ea is			94.8845
rule OHadsorption2 occurs 1 times
rule OHdesorption2 occurs 1 times					C(CO)(CO)O.[{M}].[{M}]>>C(O_[{M}])(CO)CO_[{M}]	-36.8737	0
rule CHscission occurs 1 times					C(O_[{M}])(CO)CO_[{M}].[{M}].[{M}]>>C(CO_[{M}])(CO_[{M}])([{M}])O.[{M}H]	-51.7113	49.4915
rule OHscission occurs 1 times					C(CO_[{M}])(CO_[{M}])([{M}])O.[{M}].[{M}]>>C(C([{M}])O)(CO_[{M}])([{M}])O.[{M}].[{M}H]	-35.246	66.2861
rule CHformation occurs 2 times					C(C([{M}])O)(CO_[{M}])([{M}])O.[{M}].[{M}]>>C(C(CO_[{M}])([{M}])O)([{M}])([{M}])O.[{M}H]	-11.7605	90.2412
rule COScission occurs 1 times					C(C(CO_[{M}])([{M}])O)([{M}])([{M}])O>>C(C(=O)CO_[{M}])([{M}])([{M}])O.[{M}H]	4.2424	57.6605
Max Ea is			155.673		C(C(=O)CO_[{M}])([{M}])([{M}])O>>C(=O)(C(=O)CO_[{M}])[{M}].[{M}H]	11.907	64.2521
					C(=O)(C(=O)CO_[{M}])[{M}].[{M}].[{M}]>>C(=O)([{M}])[{M}].C(=O)(CO_[{M}])[{M}]	-119.788	74.2951
C(CO)(CO)O.[{M}].[{M}]>>C(O_[{M}])(CO)CO_[{M}]	-36.8737	0			C(=O)([{M}])[{M}]>>O=[C:].[{M}].[{M}]	102.221	0
C(O_[{M}])(CO)CO_[{M}].[{M}].[{M}]>>C(C(O_[{M}])CO_[{M}])([{M}])O.[{M}H]	-79.7489	20.8931
C(C(O_[{M}])CO_[{M}])([{M}])O.[{M}].[{M}]>>C(C([{M}])O)(CO[{M}])O_[{M}].[{M}].[{M}H]	40.5136	88.8537			the above pathway is of length 8 and contains
C(C([{M}])O)(CO[{M}])O_[{M}].[{M}H]>>C(O_[{M}])(CO[{M}])CO_[{M}].[{M}]	56.6594	103.37			rule OHadsorption2 occurs 1 times
C(O_[{M}])(CO[{M}])CO_[{M}].[{M}].[{M}]>>C(O_[{M}])(C[{M}])CO_[{M}].O([{M}])[{M}]	-29.3914	155.673			rule CHscission occurs 1 times
C(O_[{M}])(C[{M}])CO_[{M}].[{M}H]>>C(O_[{M}])(CO_[{M}])C.[{M}].[{M}]	29.2229	79.1437			rule CHscission2 occurs 1 times
C(O_[{M}])(CO_[{M}])C>>C(CO)(O)C.[{M}].[{M}]	38.1286	0			rule CHscission7 occurs 1 times
					rule CCscission occurs 1 times
the above pathway is of length 7 and contains					rule CdoubleOFromCOH occurs 2 times
rule OHadsorption2 occurs 1 times					rule CarbonMonoxideFormation occurs 1 times
rule OHdesorption2 occurs 1 times					Max Ea is			90.2412
rule CHscission occurs 1 times
rule OHscission2 occurs 1 times					C(CO)(CO)O.[{M}].[{M}]>>C(O_[{M}])(CO)CO_[{M}]	-36.8737	0
rule CHformation occurs 1 times					C(O_[{M}])(CO)CO_[{M}].[{M}].[{M}]>>C(C(O_[{M}])CO_[{M}])([{M}])O.[{M}H]	-79.7489	20.8931
rule CHformation2 occurs 1 times					C(C(O_[{M}])CO_[{M}])([{M}])O.[{M}].[{M}]>>C(C(O_[{M}])CO_[{M}])([{M}])([{M}])O.[{M}H]	-20.408	81.4208
rule COScission occurs 1 times					C(C(O_[{M}])CO_[{M}])([{M}])([{M}])O.[{M}].[{M}]>>C(C(O[{M}])CO_[{M}])([{M}])([{M}])O.[{M}].[{M}H]	46.4003	93.9163
Max Ea is			155.673		C(C(O[{M}])CO_[{M}])([{M}])([{M}])O>>C(C(=O)CO_[{M}])([{M}])([{M}])O.[{M}H]	-40.7188	60.7038
					C(C(=O)CO_[{M}])([{M}])([{M}])O>>C(=O)(C(=O)CO_[{M}])[{M}].[{M}H]	11.907	64.2521
C(CO)(CO)O.[{M}].[{M}]>>C(O_[{M}])(CO)CO_[{M}]	-36.8737	0			C(=O)(C(=O)CO_[{M}])[{M}].[{M}].[{M}]>>C(=O)([{M}])[{M}].C(=O)(CO_[{M}])[{M}]	-119.788	74.2951
C(O_[{M}])(CO)CO_[{M}].[{M}].[{M}]>>C(CO_[{M}])(CO_[{M}])([{M}])O.[{M}H]	-51.7113	49.4915			C(=O)([{M}])[{M}]>>O=[C:].[{M}].[{M}]	102.221	0
C(CO_[{M}])(CO_[{M}])([{M}])O.[{M}].[{M}]>>C(CO[{M}])(CO_[{M}])([{M}])O.[{M}].[{M}H]	40.5136	88.8537
C(CO[{M}])(CO_[{M}])([{M}])O.[{M}H]>>C(O_[{M}])(CO[{M}])CO_[{M}].[{M}]	28.6218	102.809			the above pathway is of length 8 and contains
C(O_[{M}])(CO[{M}])CO_[{M}].[{M}].[{M}]>>C(O_[{M}])(C[{M}])CO_[{M}].O([{M}])[{M}]	-29.3914	155.673			rule OHadsorption2 occurs 1 times
C(O_[{M}])(C[{M}])CO_[{M}].[{M}H]>>C(O_[{M}])(CO_[{M}])C.[{M}].[{M}]	29.2229	79.1437			rule CHscission occurs 2 times
C(O_[{M}])(CO_[{M}])C>>C(CO)(O)C.[{M}].[{M}]	38.1286	0			rule CCscission occurs 1 times
					rule OHscission2 occurs 1 times
the above pathway is of length 7 and contains					rule CdoubleOFormation occurs 1 times
rule OHadsorption2 occurs 1 times					rule CdoubleOFromCOH occurs 1 times
rule OHdesorption2 occurs 1 times					rule CarbonMonoxideFormation occurs 1 times
rule CHscission7 occurs 1 times					Max Ea is			93.9163
rule OHscission2 occurs 1 times
rule CHformation occurs 1 times					C(CO)(CO)O.[{M}].[{M}]>>C(O_[{M}])(CO)CO_[{M}]	-36.8737	0
rule CHformation2 occurs 1 times					C(O_[{M}])(CO)CO_[{M}].[{M}].[{M}]>>C(C(O_[{M}])CO_[{M}])([{M}])O.[{M}H]	-79.7489	20.8931
rule COScission occurs 1 times					C(C(O_[{M}])CO_[{M}])([{M}])O.[{M}].[{M}]>>C(C([{M}])O)(CO_[{M}])O[{M}].[{M}].[{M}H]	46.4003	93.9163
Max Ea is			155.673		C(C([{M}])O)(CO_[{M}])O[{M}].[{M}].[{M}]>>C(C(O[{M}])CO_[{M}])([{M}])([{M}])O.[{M}H]	-20.408	81.4208
					C(C(O[{M}])CO_[{M}])([{M}])([{M}])O>>C(C(=O)CO_[{M}])([{M}])([{M}])O.[{M}H]	-40.7188	60.7038
C(CO)(CO)O.[{M}].[{M}]>>C(O_[{M}])(CO)CO_[{M}]	-36.8737	0			C(C(=O)CO_[{M}])([{M}])([{M}])O>>C(=O)(C(=O)CO_[{M}])[{M}].[{M}H]	11.907	64.2521
C(O_[{M}])(CO)CO_[{M}].[{M}].[{M}]>>C(O[{M}])(CO_[{M}])CO_[{M}].[{M}H]	23.3108	74.0593			C(=O)(C(=O)CO_[{M}])[{M}].[{M}].[{M}]>>C(=O)([{M}])[{M}].C(=O)(CO_[{M}])[{M}]	-119.788	74.2951
C(O[{M}])(CO_[{M}])CO_[{M}].[{M}].[{M}]>>C(O[{M}])(CO[{M}])CO_[{M}].[{M}].[{M}H]	40.5136	88.8537			C(=O)([{M}])[{M}]>>O=[C:].[{M}].[{M}]	102.221	0
C(O[{M}])(CO[{M}])CO_[{M}].[{M}H]>>C(O_[{M}])(CO[{M}])CO_[{M}].[{M}]	-46.4003	60.508
C(O_[{M}])(CO[{M}])CO_[{M}].[{M}].[{M}]>>C(O_[{M}])(C[{M}])CO_[{M}].O([{M}])[{M}]	-29.3914	155.673			the above pathway is of length 8 and contains
C(O_[{M}])(C[{M}])CO_[{M}].[{M}H]>>C(O_[{M}])(CO_[{M}])C.[{M}].[{M}]	29.2229	79.1437			rule OHadsorption2 occurs 1 times
C(O_[{M}])(CO_[{M}])C>>C(CO)(O)C.[{M}].[{M}]	38.1286	0			rule CHscission occurs 2 times
					rule CCscission occurs 1 times
the above pathway is of length 7 and contains					rule OHscission2 occurs 1 times
rule OHadsorption2 occurs 1 times					rule CdoubleOFormation occurs 1 times
rule OHdesorption2 occurs 1 times					rule CdoubleOFromCOH occurs 1 times
rule OHscission2 occurs 1 times					rule CarbonMonoxideFormation occurs 1 times
rule OHscission4 occurs 1 times					Max Ea is			93.9163
rule CHformation occurs 1 times
rule OHformation2 occurs 1 times					C(CO)(CO)O.[{M}].[{M}]>>C(O_[{M}])(CO)CO_[{M}]	-36.8737	0
rule COScission occurs 1 times					C(O_[{M}])(CO)CO_[{M}].[{M}].[{M}]>>C(O[{M}])(CO_[{M}])CO_[{M}].[{M}H]	23.3108	74.0593
Max Ea is			155.673		C(O[{M}])(CO_[{M}])CO_[{M}].[{M}].[{M}]>>C(C([{M}])O)(CO_[{M}])O[{M}].[{M}].[{M}H]	-56.6594	44.4444
					C(C([{M}])O)(CO_[{M}])O[{M}].[{M}].[{M}]>>C(C(O[{M}])CO_[{M}])([{M}])([{M}])O.[{M}H]	-20.408	81.4208
C(CO)(CO)O.[{M}].[{M}]>>C(O_[{M}])(CO)CO_[{M}]	-36.8737	0			C(C(O[{M}])CO_[{M}])([{M}])([{M}])O>>C(C(=O)CO_[{M}])([{M}])([{M}])O.[{M}H]	-40.7188	60.7038
C(O_[{M}])(CO)CO_[{M}].[{M}].[{M}]>>C(C(O_[{M}])CO_[{M}])([{M}])O.[{M}H]	-79.7489	20.8931			C(C(=O)CO_[{M}])([{M}])([{M}])O>>C(=O)(C(=O)CO_[{M}])[{M}].[{M}H]	11.907	64.2521
C(C(O_[{M}])CO_[{M}])([{M}])O.[{M}].[{M}]>>C(C([{M}])O)(O_[{M}])C[{M}].[{M}]O.[{M}]	18.6663	150.803			C(=O)(C(=O)CO_[{M}])[{M}].[{M}].[{M}]>>C(=O)([{M}])[{M}].C(=O)(CO_[{M}])[{M}]	-119.788	74.2951
C(C([{M}])O)(O_[{M}])C[{M}].[{M}H]>>C(O_[{M}])(C[{M}])CO_[{M}].[{M}]	56.6594	103.37			C(=O)([{M}])[{M}]>>O=[C:].[{M}].[{M}]	102.221	0
C(O_[{M}])(C[{M}])CO_[{M}].[{M}H]>>C(O_[{M}])(CO_[{M}])C.[{M}].[{M}]	29.2229	79.1437
C(O_[{M}])(CO_[{M}])C>>C(CO)(O)C.[{M}].[{M}]	38.1286	0			the above pathway is of length 8 and contains
					rule OHadsorption2 occurs 1 times
the above pathway is of length 6 and contains					rule CHscission occurs 1 times
rule OHadsorption2 occurs 1 times					rule CHscission2 occurs 1 times
rule OHdesorption2 occurs 1 times					rule CCscission occurs 1 times
rule CHscission occurs 1 times					rule OHscission4 occurs 1 times
rule CHformation occurs 1 times					rule CdoubleOFormation occurs 1 times
rule CHformation2 occurs 1 times					rule CdoubleOFromCOH occurs 1 times
rule COScission2 occurs 1 times					rule CarbonMonoxideFormation occurs 1 times
Max Ea is			150.803		Max Ea is			81.4208
C(CO)(CO)O.[{M}].[{M}]>>C(O_[{M}])(CO)CO_[{M}]	-36.8737	0			C(CO)(CO)O.[{M}].[{M}]>>C(O_[{M}])(CO)CO_[{M}]	-36.8737	0
C(O_[{M}])(CO)CO_[{M}].[{M}].[{M}]>>C(C(O_[{M}])CO_[{M}])([{M}])O.[{M}H]	-79.7489	20.8931			C(O_[{M}])(CO)CO_[{M}].[{M}].[{M}]>>C(C(O_[{M}])CO_[{M}])([{M}])O.[{M}H]	-79.7489	20.8931
C(C(O_[{M}])CO_[{M}])([{M}])O.[{M}].[{M}]>>C(C([{M}])O)(CO[{M}])O_[{M}].[{M}].[{M}H]	40.5136	88.8537			C(C(O_[{M}])CO_[{M}])([{M}])O.[{M}].[{M}]>>C(C([{M}])O)(CO_[{M}])([{M}])O.[{M}].[{M}H]	-7.20837	94.8845
C(C([{M}])O)(CO[{M}])O_[{M}].[{M}].[{M}]>>C(C([{M}])O)(O_[{M}])C[{M}].O([{M}])[{M}]	-29.3914	155.673			C(C([{M}])O)(CO_[{M}])([{M}])O>>C(=O)(C([{M}])O)CO_[{M}].[{M}H]	26.39	76.7074
C(C([{M}])O)(O_[{M}])C[{M}].[{M}H]>>C(O_[{M}])(C[{M}])CO_[{M}].[{M}]	56.6594	103.37			C(=O)(C([{M}])O)CO_[{M}].[{M}].[{M}]>>C(C(=O)CO_[{M}])([{M}])([{M}])O.[{M}H]	-33.9082	67.6507
C(O_[{M}])(C[{M}])CO_[{M}].[{M}H]>>C(O_[{M}])(CO_[{M}])C.[{M}].[{M}]	29.2229	79.1437			C(C(=O)CO_[{M}])([{M}])([{M}])O>>C(=O)(C(=O)CO_[{M}])[{M}].[{M}H]	11.907	64.2521
C(O_[{M}])(CO_[{M}])C>>C(CO)(O)C.[{M}].[{M}]	38.1286	0			C(=O)(C(=O)CO_[{M}])[{M}].[{M}].[{M}]>>C(=O)([{M}])[{M}].C(=O)(CO_[{M}])[{M}]	-119.788	74.2951
					C(=O)([{M}])[{M}]>>O=[C:].[{M}].[{M}]	102.221	0
the above pathway is of length 7 and contains
rule OHadsorption2 occurs 1 times					the above pathway is of length 8 and contains
rule OHdesorption2 occurs 1 times					rule OHadsorption2 occurs 1 times
rule CHscission occurs 1 times					rule CHscission occurs 2 times
rule OHscission2 occurs 1 times					rule CHscission2 occurs 1 times
rule CHformation occurs 1 times					rule CCscission occurs 1 times
rule CHformation2 occurs 1 times					rule CdoubleOFromCOH occurs 2 times
rule COScission occurs 1 times					rule CarbonMonoxideFormation occurs 1 times
Max Ea is			155.673		Max Ea is			94.8845
C(CO)(CO)O.[{M}].[{M}]>>C(O_[{M}])(CO)CO_[{M}]	-36.8737	0			C(CO)(CO)O.[{M}].[{M}]>>C(O_[{M}])(CO)CO_[{M}]	-36.8737	0
C(O_[{M}])(CO)CO_[{M}].[{M}].[{M}]>>C(O_[{M}])(CO[{M}])CO_[{M}].[{M}H]	17.4241	68.9967			C(O_[{M}])(CO)CO_[{M}].[{M}].[{M}]>>C(CO_[{M}])(CO_[{M}])([{M}])O.[{M}H]	-51.7113	49.4915
C(O_[{M}])(CO[{M}])CO_[{M}].[{M}].[{M}]>>C(C([{M}])O)(CO[{M}])O_[{M}].[{M}].[{M}H]	-56.6594	44.4444			C(CO_[{M}])(CO_[{M}])([{M}])O.[{M}].[{M}]>>C(C([{M}])O)(CO_[{M}])([{M}])O.[{M}].[{M}H]	-35.246	66.2861
C(C([{M}])O)(CO[{M}])O_[{M}].[{M}].[{M}]>>C(C([{M}])O)(O_[{M}])C[{M}].O([{M}])[{M}]	-29.3914	155.673			C(C([{M}])O)(CO_[{M}])([{M}])O>>C(=O)(C([{M}])O)CO_[{M}].[{M}H]	26.39	76.7074
C(C([{M}])O)(O_[{M}])C[{M}].[{M}H]>>C(O_[{M}])(C[{M}])CO_[{M}].[{M}]	56.6594	103.37			C(=O)(C([{M}])O)CO_[{M}].[{M}].[{M}]>>C(C(=O)CO_[{M}])([{M}])([{M}])O.[{M}H]	-33.9082	67.6507
C(O_[{M}])(C[{M}])CO_[{M}].[{M}H]>>C(O_[{M}])(CO_[{M}])C.[{M}].[{M}]	29.2229	79.1437			C(C(=O)CO_[{M}])([{M}])([{M}])O>>C(=O)(C(=O)CO_[{M}])[{M}].[{M}H]	11.907	64.2521
C(O_[{M}])(CO_[{M}])C>>C(CO)(O)C.[{M}].[{M}]	38.1286	0			C(=O)(C(=O)CO_[{M}])[{M}].[{M}].[{M}]>>C(=O)([{M}])[{M}].C(=O)(CO_[{M}])[{M}]	-119.788	74.2951
					C(=O)([{M}])[{M}]>>O=[C:].[{M}].[{M}]	102.221	0
the above pathway is of length 7 and contains
rule OHadsorption2 occurs 1 times					the above pathway is of length 8 and contains
rule OHdesorption2 occurs 1 times					rule OHadsorption2 occurs 1 times
rule CHscission2 occurs 1 times					rule CHscission occurs 1 times
rule OHscission occurs 1 times					rule CHscission2 occurs 1 times
rule CHformation occurs 1 times					rule CHscission7 occurs 1 times
rule CHformation2 occurs 1 times					rule CCscission occurs 1 times
rule COScission occurs 1 times					rule CdoubleOFromCOH occurs 2 times
Max Ea is			155.673		rule CarbonMonoxideFormation occurs 1 times
					Max Ea is			76.7074
C(CO)(CO)O.[{M}].[{M}]>>C(O_[{M}])(CO)CO_[{M}]	-36.8737	0
C(O_[{M}])(CO)CO_[{M}].[{M}].[{M}]>>C(CO_[{M}])(CO_[{M}])([{M}])O.[{M}H]	-51.7113	49.4915			C(CO)(CO)O.[{M}].[{M}]>>C(O_[{M}])(CO)CO_[{M}]	-36.8737	0
C(CO_[{M}])(CO_[{M}])([{M}])O.[{M}].[{M}]>>C(CO_[{M}])(C[{M}])([{M}])O.[{M}]O.[{M}]	40.0797	165.579			C(O_[{M}])(CO)CO_[{M}].[{M}].[{M}]>>C(C(O_[{M}])CO_[{M}])([{M}])O.[{M}H]	-79.7489	20.8931
C(CO_[{M}])(C[{M}])([{M}])O.[{M}H]>>C(O_[{M}])(C[{M}])CO_[{M}].[{M}]	7.20837	102.381			C(C(O_[{M}])CO_[{M}])([{M}])O.[{M}].[{M}]>>C(C([{M}])O)(CO_[{M}])O[{M}].[{M}].[{M}H]	46.4003	93.9163
C(O_[{M}])(C[{M}])CO_[{M}].[{M}H]>>C(O_[{M}])(CO_[{M}])C.[{M}].[{M}]	29.2229	79.1437			C(C([{M}])O)(CO_[{M}])O[{M}]>>C(=O)(C([{M}])O)CO_[{M}].[{M}H]	-27.2187	74.474
C(O_[{M}])(CO_[{M}])C>>C(CO)(O)C.[{M}].[{M}]	38.1286	0			C(=O)(C([{M}])O)CO_[{M}].[{M}].[{M}]>>C(C(=O)CO_[{M}])([{M}])([{M}])O.[{M}H]	-33.9082	67.6507
					C(C(=O)CO_[{M}])([{M}])([{M}])O>>C(=O)(C(=O)CO_[{M}])[{M}].[{M}H]	11.907	64.2521
the above pathway is of length 6 and contains					C(=O)(C(=O)CO_[{M}])[{M}].[{M}].[{M}]>>C(=O)([{M}])[{M}].C(=O)(CO_[{M}])[{M}]	-119.788	74.2951
rule OHadsorption2 occurs 1 times					C(=O)([{M}])[{M}]>>O=[C:].[{M}].[{M}]	102.221	0
rule OHdesorption2 occurs 1 times
rule CHscission7 occurs 1 times					the above pathway is of length 8 and contains
rule CHformation occurs 1 times					rule OHadsorption2 occurs 1 times
rule CHformation2 occurs 1 times					rule CHscission occurs 2 times
rule COScission2 occurs 1 times					rule CCscission occurs 1 times
Max Ea is			165.579		rule OHscission2 occurs 1 times
					rule CdoubleOFormation occurs 1 times
C(CO)(CO)O.[{M}].[{M}]>>C(O_[{M}])(CO)CO_[{M}]	-36.8737	0			rule CdoubleOFromCOH occurs 1 times
C(O_[{M}])(CO)CO_[{M}].[{M}].[{M}]>>C(CO_[{M}])(CO_[{M}])([{M}])O.[{M}H]	-51.7113	49.4915			rule CarbonMonoxideFormation occurs 1 times
C(CO_[{M}])(CO_[{M}])([{M}])O.[{M}].[{M}]>>C(CO[{M}])(CO_[{M}])([{M}])O.[{M}].[{M}H]	40.5136	88.8537			Max Ea is			93.9163
C(CO[{M}])(CO_[{M}])([{M}])O.[{M}].[{M}]>>C(CO_[{M}])(C[{M}])([{M}])O.O([{M}])[{M}]	-7.97797	173.66
C(CO_[{M}])(C[{M}])([{M}])O.[{M}H]>>C(O_[{M}])(C[{M}])CO_[{M}].[{M}]	7.20837	102.381			C(CO)(CO)O.[{M}].[{M}]>>C(O_[{M}])(CO)CO_[{M}]	-36.8737	0
C(O_[{M}])(C[{M}])CO_[{M}].[{M}H]>>C(O_[{M}])(CO_[{M}])C.[{M}].[{M}]	29.2229	79.1437			C(O_[{M}])(CO)CO_[{M}].[{M}].[{M}]>>C(O[{M}])(CO_[{M}])CO_[{M}].[{M}H]	23.3108	74.0593
C(O_[{M}])(CO_[{M}])C>>C(CO)(O)C.[{M}].[{M}]	38.1286	0			C(O[{M}])(CO_[{M}])CO_[{M}].[{M}].[{M}]>>C(C([{M}])O)(CO_[{M}])O[{M}].[{M}].[{M}H]	-56.6594	44.4444
					C(C([{M}])O)(CO_[{M}])O[{M}]>>C(=O)(C([{M}])O)CO_[{M}].[{M}H]	-27.2187	74.474
the above pathway is of length 7 and contains					C(=O)(C([{M}])O)CO_[{M}].[{M}].[{M}]>>C(C(=O)CO_[{M}])([{M}])([{M}])O.[{M}H]	-33.9082	67.6507
rule OHadsorption2 occurs 1 times					C(C(=O)CO_[{M}])([{M}])([{M}])O>>C(=O)(C(=O)CO_[{M}])[{M}].[{M}H]	11.907	64.2521
rule OHdesorption2 occurs 1 times					C(=O)(C(=O)CO_[{M}])[{M}].[{M}].[{M}]>>C(=O)([{M}])[{M}].C(=O)(CO_[{M}])[{M}]	-119.788	74.2951
rule CHscission7 occurs 1 times					C(=O)([{M}])[{M}]>>O=[C:].[{M}].[{M}]	102.221	0
rule OHscission2 occurs 1 times
rule CHformation occurs 1 times					the above pathway is of length 8 and contains
rule CHformation2 occurs 1 times					rule OHadsorption2 occurs 1 times
rule COScission occurs 1 times					rule CHscission occurs 1 times
Max Ea is			173.66		rule CHscission2 occurs 1 times
					rule CCscission occurs 1 times
C(CO)(CO)O.[{M}].[{M}]>>C(O_[{M}])(CO)CO_[{M}]	-36.8737	0			rule OHscission4 occurs 1 times
C(O_[{M}])(CO)CO_[{M}].[{M}].[{M}]>>C(O_[{M}])(CO[{M}])CO_[{M}].[{M}H]	17.4241	68.9967			rule CdoubleOFormation occurs 1 times
C(O_[{M}])(CO[{M}])CO_[{M}].[{M}].[{M}]>>C(CO[{M}])(CO_[{M}])([{M}])O.[{M}].[{M}H]	-28.6218	73.0428			rule CdoubleOFromCOH occurs 1 times
C(CO[{M}])(CO_[{M}])([{M}])O.[{M}].[{M}]>>C(CO_[{M}])(C[{M}])([{M}])O.O([{M}])[{M}]	-7.97797	173.66			rule CarbonMonoxideFormation occurs 1 times
C(CO_[{M}])(C[{M}])([{M}])O.[{M}H]>>C(O_[{M}])(C[{M}])CO_[{M}].[{M}]	7.20837	102.381			Max Ea is			74.474
C(O_[{M}])(C[{M}])CO_[{M}].[{M}H]>>C(O_[{M}])(CO_[{M}])C.[{M}].[{M}]	29.2229	79.1437
C(O_[{M}])(CO_[{M}])C>>C(CO)(O)C.[{M}].[{M}]	38.1286	0			C(CO)(CO)O.[{M}].[{M}]>>C(O_[{M}])(CO)CO_[{M}]	-36.8737	0
					C(O_[{M}])(CO)CO_[{M}].[{M}].[{M}]>>C(CO_[{M}])(CO_[{M}])([{M}])O.[{M}H]	-51.7113	49.4915
the above pathway is of length 7 and contains					C(CO_[{M}])(CO_[{M}])([{M}])O.[{M}].[{M}]>>C(O[{M}])(CO_[{M}])(CO_[{M}])[{M}].[{M}H]	38.8376	87.4123
rule OHadsorption2 occurs 1 times					C(O[{M}])(CO_[{M}])(CO_[{M}])[{M}].[{M}].[{M}]>>C(=O)(C([{M}])O)CO_[{M}].[{M}].[{M}].[{M}].[{M}H]	-47.6935	53.5896
rule OHdesorption2 occurs 1 times					C(=O)(C([{M}])O)CO_[{M}].[{M}].[{M}]>>C(C(=O)CO_[{M}])([{M}])([{M}])O.[{M}H]	-33.9082	67.6507
rule CHscission2 occurs 1 times					C(C(=O)CO_[{M}])([{M}])([{M}])O>>C(=O)(C(=O)CO_[{M}])[{M}].[{M}H]	11.907	64.2521
rule OHscission occurs 1 times					C(=O)(C(=O)CO_[{M}])[{M}].[{M}].[{M}]>>C(=O)([{M}])[{M}].C(=O)(CO_[{M}])[{M}]	-119.788	74.2951
rule CHformation occurs 1 times					C(=O)([{M}])[{M}]>>O=[C:].[{M}].[{M}]	102.221	0
rule CHformation2 occurs 1 times
rule COScission occurs 1 times					the above pathway is of length 8 and contains
Max Ea is			173.66		rule OHadsorption2 occurs 1 times
					rule CHscission occurs 1 times
C(CO)(CO)O.[{M}].[{M}]>>C(O_[{M}])(CO)CO_[{M}]	-36.8737	0			rule CHscission5 occurs 1 times
C(O_[{M}])(CO)CO_[{M}].[{M}].[{M}]>>C(O_[{M}])(CO[{M}])CO_[{M}].[{M}H]	17.4241	68.9967			rule CHscission7 occurs 1 times
C(O_[{M}])(CO[{M}])CO_[{M}].[{M}].[{M}]>>C(CO[{M}])(O_[{M}])C[{M}].[{M}]O.[{M}]	18.6663	150.803			rule CCscission occurs 1 times
C(CO[{M}])(O_[{M}])C[{M}].[{M}H]>>C(O_[{M}])(C[{M}])CO_[{M}].[{M}]	-40.5136	59.6839			rule OHscission occurs 1 times
C(O_[{M}])(C[{M}])CO_[{M}].[{M}H]>>C(O_[{M}])(CO_[{M}])C.[{M}].[{M}]	29.2229	79.1437			rule CdoubleOFromCOH occurs 1 times
C(O_[{M}])(CO_[{M}])C>>C(CO)(O)C.[{M}].[{M}]	38.1286	0			rule CarbonMonoxideFormation occurs 1 times
					Max Ea is			87.4123
the above pathway is of length 6 and contains
rule OHadsorption2 occurs 1 times					C(CO)(CO)O.[{M}].[{M}]>>C(O_[{M}])(CO)CO_[{M}]	-36.8737	0
rule OHdesorption2 occurs 1 times					C(O_[{M}])(CO)CO_[{M}].[{M}].[{M}]>>C(O[{M}])(CO_[{M}])CO_[{M}].[{M}H]	23.3108	74.0593
rule OHscission occurs 1 times					C(O[{M}])(CO_[{M}])CO_[{M}].[{M}].[{M}]>>C(O[{M}])(CO_[{M}])(CO_[{M}])[{M}].[{M}H]	-36.1845	65.3288			265.118
rule CHformation occurs 1 times					C(O[{M}])(CO_[{M}])(CO_[{M}])[{M}].[{M}].[{M}]>>C(=O)(C([{M}])O)CO_[{M}].[{M}].[{M}].[{M}].[{M}H]	-47.6935	53.5896
rule OHformation2 occurs 1 times					C(=O)(C([{M}])O)CO_[{M}].[{M}].[{M}]>>C(C(=O)CO_[{M}])([{M}])([{M}])O.[{M}H]	-33.9082	67.6507
rule COScission2 occurs 1 times					C(C(=O)CO_[{M}])([{M}])([{M}])O>>C(=O)(C(=O)CO_[{M}])[{M}].[{M}H]	11.907	64.2521
Max Ea is			150.803		C(=O)(C(=O)CO_[{M}])[{M}].[{M}].[{M}]>>C(=O)([{M}])[{M}].C(=O)(CO_[{M}])[{M}]	-119.788	74.2951		-96.448	89.6998
					C(=O)([{M}])[{M}]>>O=[C:].[{M}].[{M}]	102.221	0			15.4044
C(CO)(CO)O.[{M}].[{M}]>>C(O_[{M}])(CO)CO_[{M}]	-36.8737	0							97.8661	23.8068
C(O_[{M}])(CO)CO_[{M}].[{M}].[{M}]>>C(O_[{M}])(CO[{M}])CO_[{M}].[{M}H]	17.4241	68.9967			the above pathway is of length 8 and contains
C(O_[{M}])(CO[{M}])CO_[{M}].[{M}].[{M}]>>C(O_[{M}])(CO[{M}])CO[{M}].[{M}].[{M}H]	40.5136	88.8537			rule OHadsorption2 occurs 1 times
C(O_[{M}])(CO[{M}])CO[{M}].[{M}].[{M}]>>C(CO[{M}])(O_[{M}])C[{M}].O([{M}])[{M}]	-29.3914	155.673			rule CHscission occurs 2 times
C(CO[{M}])(O_[{M}])C[{M}].[{M}H]>>C(O_[{M}])(C[{M}])CO_[{M}].[{M}]	-40.5136	59.6839			rule CHscission5 occurs 1 times
C(O_[{M}])(C[{M}])CO_[{M}].[{M}H]>>C(O_[{M}])(CO_[{M}])C.[{M}].[{M}]	29.2229	79.1437			rule CCscission occurs 1 times
C(O_[{M}])(CO_[{M}])C>>C(CO)(O)C.[{M}].[{M}]	38.1286	0			rule OHscission4 occurs 1 times
					rule CdoubleOFromCOH occurs 1 times
the above pathway is of length 7 and contains					rule CarbonMonoxideFormation occurs 1 times
rule OHadsorption2 occurs 1 times					Max Ea is			74.2951
rule OHdesorption2 occurs 1 times
rule OHscission occurs 1 times					C(CO)(CO)O.[{M}].[{M}]>>C(O_[{M}])(CO)CO_[{M}]	-36.8737	0
rule OHscission2 occurs 1 times					C(O_[{M}])(CO)CO_[{M}].[{M}].[{M}]>>C(C(O_[{M}])CO_[{M}])([{M}])O.[{M}H]	-79.7489	20.8931
rule CHformation occurs 1 times					C(C(O_[{M}])CO_[{M}])([{M}])O.[{M}].[{M}]>>C(C(O_[{M}])CO_[{M}])([{M}])([{M}])O.[{M}H]	-20.408	81.4208
rule OHformation2 occurs 1 times					C(C(O_[{M}])CO_[{M}])([{M}])([{M}])O.[{M}].[{M}]>>C(C(CO_[{M}])([{M}])O)([{M}])([{M}])O.[{M}].[{M}H]	1.4391	103.705
rule COScission occurs 1 times					C(C(CO_[{M}])([{M}])O)([{M}])([{M}])O>>C(C(=O)[{M}])(CO_[{M}])([{M}])O.[{M}H]	-21.9441	35.1401
Max Ea is			155.673		C(C(=O)[{M}])(CO_[{M}])([{M}])O>>C(=O)(C(=O)CO_[{M}])[{M}].[{M}H]	38.0935	86.7724
					C(=O)(C(=O)CO_[{M}])[{M}].[{M}].[{M}]>>C(=O)([{M}])[{M}].C(=O)(CO_[{M}])[{M}]	-119.788	74.2951
C(CO)(CO)O.[{M}].[{M}]>>C(O_[{M}])(CO)CO_[{M}]	-36.8737	0			C(=O)([{M}])[{M}]>>O=[C:].[{M}].[{M}]	102.221	0
C(O_[{M}])(CO)CO_[{M}].[{M}].[{M}]>>C(O[{M}])(CO_[{M}])CO_[{M}].[{M}H]	23.3108	74.0593
C(O[{M}])(CO_[{M}])CO_[{M}].[{M}].[{M}]>>C(CO_[{M}])(O[{M}])C[{M}].[{M}]O.[{M}]	18.6663	150.803			the above pathway is of length 8 and contains
C(CO_[{M}])(O[{M}])C[{M}].[{M}H]>>C(O_[{M}])(C[{M}])CO_[{M}].[{M}]	-46.4003	60.508			rule OHadsorption2 occurs 1 times
C(O_[{M}])(C[{M}])CO_[{M}].[{M}H]>>C(O_[{M}])(CO_[{M}])C.[{M}].[{M}]	29.2229	79.1437			rule CHscission occurs 2 times
C(O_[{M}])(CO_[{M}])C>>C(CO)(O)C.[{M}].[{M}]	38.1286	0			rule CHscission2 occurs 1 times
					rule CCscission occurs 1 times
the above pathway is of length 6 and contains					rule CdoubleOFromCOH occurs 2 times
rule OHadsorption2 occurs 1 times					rule CarbonMonoxideFormation occurs 1 times
rule OHdesorption2 occurs 1 times					Max Ea is			103.705
rule OHscission4 occurs 1 times
rule CHformation occurs 1 times					C(CO)(CO)O.[{M}].[{M}]>>C(O_[{M}])(CO)CO_[{M}]	-36.8737	0
rule OHformation2 occurs 1 times					C(O_[{M}])(CO)CO_[{M}].[{M}].[{M}]>>C(C(O_[{M}])CO_[{M}])([{M}])O.[{M}H]	-79.7489	20.8931
rule COScission2 occurs 1 times					C(C(O_[{M}])CO_[{M}])([{M}])O.[{M}].[{M}]>>C(C([{M}])O)(CO_[{M}])([{M}])O.[{M}].[{M}H]	-7.20837	94.8845
Max Ea is			150.803		C(C([{M}])O)(CO_[{M}])([{M}])O.[{M}].[{M}]>>C(C(CO_[{M}])([{M}])O)([{M}])([{M}])O.[{M}H]	-11.7605	90.2412
					C(C(CO_[{M}])([{M}])O)([{M}])([{M}])O>>C(C(=O)[{M}])(CO_[{M}])([{M}])O.[{M}H]	-21.9441	35.1401
C(CO)(CO)O.[{M}].[{M}]>>C(O_[{M}])(CO)CO_[{M}]	-36.8737	0			C(C(=O)[{M}])(CO_[{M}])([{M}])O>>C(=O)(C(=O)CO_[{M}])[{M}].[{M}H]	38.0935	86.7724
C(O_[{M}])(CO)CO_[{M}].[{M}].[{M}]>>C(O_[{M}])(CO[{M}])CO_[{M}].[{M}H]	17.4241	68.9967			C(=O)(C(=O)CO_[{M}])[{M}].[{M}].[{M}]>>C(=O)([{M}])[{M}].C(=O)(CO_[{M}])[{M}]	-119.788	74.2951
C(O_[{M}])(CO[{M}])CO_[{M}].[{M}].[{M}]>>C(O[{M}])(CO[{M}])CO_[{M}].[{M}].[{M}H]	46.4003	93.9163			C(=O)([{M}])[{M}]>>O=[C:].[{M}].[{M}]	102.221	0
C(O[{M}])(CO[{M}])CO_[{M}].[{M}].[{M}]>>C(CO_[{M}])(O[{M}])C[{M}].O([{M}])[{M}]	-29.3914	155.673
C(CO_[{M}])(O[{M}])C[{M}].[{M}H]>>C(O_[{M}])(C[{M}])CO_[{M}].[{M}]	-46.4003	60.508			the above pathway is of length 8 and contains
C(O_[{M}])(C[{M}])CO_[{M}].[{M}H]>>C(O_[{M}])(CO_[{M}])C.[{M}].[{M}]	29.2229	79.1437			rule OHadsorption2 occurs 1 times
C(O_[{M}])(CO_[{M}])C>>C(CO)(O)C.[{M}].[{M}]	38.1286	0			rule CHscission occurs 2 times
					rule CHscission2 occurs 1 times
the above pathway is of length 7 and contains					rule CCscission occurs 1 times
rule OHadsorption2 occurs 1 times					rule CdoubleOFromCOH occurs 2 times
rule OHdesorption2 occurs 1 times					rule CarbonMonoxideFormation occurs 1 times
rule OHscission occurs 1 times					Max Ea is			94.8845
rule OHscission2 occurs 1 times
rule CHformation occurs 1 times					C(CO)(CO)O.[{M}].[{M}]>>C(O_[{M}])(CO)CO_[{M}]	-36.8737	0
rule OHformation2 occurs 1 times					C(O_[{M}])(CO)CO_[{M}].[{M}].[{M}]>>C(CO_[{M}])(CO_[{M}])([{M}])O.[{M}H]	-51.7113	49.4915
rule COScission occurs 1 times					C(CO_[{M}])(CO_[{M}])([{M}])O.[{M}].[{M}]>>C(C([{M}])O)(CO_[{M}])([{M}])O.[{M}].[{M}H]	-35.246	66.2861
Max Ea is			155.673		C(C([{M}])O)(CO_[{M}])([{M}])O.[{M}].[{M}]>>C(C(CO_[{M}])([{M}])O)([{M}])([{M}])O.[{M}H]	-11.7605	90.2412
					C(C(CO_[{M}])([{M}])O)([{M}])([{M}])O>>C(C(=O)[{M}])(CO_[{M}])([{M}])O.[{M}H]	-21.9441	35.1401
C(CO)(CO)O.[{M}].[{M}]>>C(O_[{M}])(CO)CO_[{M}]	-36.8737	0			C(C(=O)[{M}])(CO_[{M}])([{M}])O>>C(=O)(C(=O)CO_[{M}])[{M}].[{M}H]	38.0935	86.7724
C(O_[{M}])(CO)CO_[{M}].[{M}].[{M}]>>C(O[{M}])(CO_[{M}])CO_[{M}].[{M}H]	23.3108	74.0593			C(=O)(C(=O)CO_[{M}])[{M}].[{M}].[{M}]>>C(=O)([{M}])[{M}].C(=O)(CO_[{M}])[{M}]	-119.788	74.2951
C(O[{M}])(CO_[{M}])CO_[{M}].[{M}].[{M}]>>C(O[{M}])(CO[{M}])CO_[{M}].[{M}].[{M}H]	40.5136	88.8537			C(=O)([{M}])[{M}]>>O=[C:].[{M}].[{M}]	102.221	0
C(O[{M}])(CO[{M}])CO_[{M}].[{M}].[{M}]>>C(CO_[{M}])(O[{M}])C[{M}].O([{M}])[{M}]	-29.3914	155.673
C(CO_[{M}])(O[{M}])C[{M}].[{M}H]>>C(O_[{M}])(C[{M}])CO_[{M}].[{M}]	-46.4003	60.508			the above pathway is of length 8 and contains
C(O_[{M}])(C[{M}])CO_[{M}].[{M}H]>>C(O_[{M}])(CO_[{M}])C.[{M}].[{M}]	29.2229	79.1437			rule OHadsorption2 occurs 1 times
C(O_[{M}])(CO_[{M}])C>>C(CO)(O)C.[{M}].[{M}]	38.1286	0			rule CHscission occurs 1 times
					rule CHscission2 occurs 1 times
the above pathway is of length 7 and contains					rule CHscission7 occurs 1 times
rule OHadsorption2 occurs 1 times					rule CCscission occurs 1 times
rule OHdesorption2 occurs 1 times					rule CdoubleOFromCOH occurs 2 times
rule OHscission2 occurs 1 times					rule CarbonMonoxideFormation occurs 1 times
rule OHscission4 occurs 1 times					Max Ea is			90.2412
rule CHformation occurs 1 times
rule OHformation2 occurs 1 times					C(CO)(CO)O.[{M}].[{M}]>>C(O_[{M}])(CO)CO_[{M}]	-36.8737	0
rule COScission occurs 1 times					C(O_[{M}])(CO)CO_[{M}].[{M}].[{M}]>>C(C(O_[{M}])CO_[{M}])([{M}])O.[{M}H]	-79.7489	20.8931
Max Ea is			155.673		C(C(O_[{M}])CO_[{M}])([{M}])O.[{M}].[{M}]>>C(C(O_[{M}])CO_[{M}])([{M}])([{M}])O.[{M}H]	-20.408	81.4208
					C(C(O_[{M}])CO_[{M}])([{M}])([{M}])O>>C(=O)(C(O_[{M}])CO_[{M}])[{M}].[{M}H]	-5.59888	49.197
C(CO)(CO)O.[{M}].[{M}]>>C(O_[{M}])(CO)CO_[{M}]	-36.8737	0			C(=O)(C(O_[{M}])CO_[{M}])[{M}].[{M}].[{M}]>>C(C(=O)[{M}])(CO_[{M}])([{M}])O.[{M}].[{M}H]	-14.9061	87.0328
C(O_[{M}])(CO)CO_[{M}].[{M}].[{M}]>>C(C(O_[{M}])CO_[{M}])([{M}])O.[{M}H]	-79.7489	20.8931			C(C(=O)[{M}])(CO_[{M}])([{M}])O>>C(=O)(C(=O)CO_[{M}])[{M}].[{M}H]	38.0935	86.7724
C(C(O_[{M}])CO_[{M}])([{M}])O.[{M}].[{M}]>>C(C([{M}])O)(O_[{M}])C[{M}].[{M}]O.[{M}]	18.6663	150.803			C(=O)(C(=O)CO_[{M}])[{M}].[{M}].[{M}]>>C(=O)([{M}])[{M}].C(=O)(CO_[{M}])[{M}]	-119.788	74.2951
C(C([{M}])O)(O_[{M}])C[{M}].[{M}H]>>C(C([{M}])O)(O_[{M}])C.[{M}].[{M}]	29.2229	79.1437			C(=O)([{M}])[{M}]>>O=[C:].[{M}].[{M}]	102.221	0
C(C([{M}])O)(O_[{M}])C.[{M}H]>>C(O_[{M}])(CO_[{M}])C.[{M}]	56.6594	103.37
C(O_[{M}])(CO_[{M}])C>>C(CO)(O)C.[{M}].[{M}]	38.1286	0			the above pathway is of length 8 and contains
					rule OHadsorption2 occurs 1 times
the above pathway is of length 6 and contains					rule CHscission occurs 2 times
rule OHadsorption2 occurs 1 times					rule CHscission2 occurs 1 times
rule OHdesorption2 occurs 1 times					rule CCscission occurs 1 times
rule CHscission occurs 1 times					rule CdoubleOFromCOH occurs 2 times
rule CHformation occurs 1 times					rule CarbonMonoxideFormation occurs 1 times
rule CHformation2 occurs 1 times					Max Ea is			87.0328
rule COScission2 occurs 1 times
Max Ea is			150.803		C(CO)(CO)O.[{M}].[{M}]>>C(O_[{M}])(CO)CO_[{M}]	-36.8737	0
					C(O_[{M}])(CO)CO_[{M}].[{M}].[{M}]>>C(C(O_[{M}])CO_[{M}])([{M}])O.[{M}H]	-79.7489	20.8931
C(CO)(CO)O.[{M}].[{M}]>>C(O_[{M}])(CO)CO_[{M}]	-36.8737	0			C(C(O_[{M}])CO_[{M}])([{M}])O.[{M}].[{M}]>>C(C(O_[{M}])CO_[{M}])(O[{M}])[{M}].[{M}H]	38.8376	87.4123
C(O_[{M}])(CO)CO_[{M}].[{M}].[{M}]>>C(O_[{M}])(C[{M}])CO_[{M}].[{M}]O	-4.42321	134.871			C(C(O_[{M}])CO_[{M}])(O[{M}])[{M}].[{M}].[{M}]>>C(=O)(C(O_[{M}])CO_[{M}])[{M}].[{M}].[{M}].[{M}H]	-64.8444	36.0957
C(O_[{M}])(C[{M}])CO_[{M}].[{M}].[{M}]>>C(C([{M}])O)(O_[{M}])C[{M}].[{M}].[{M}H]	-56.6594	44.4444			C(=O)(C(O_[{M}])CO_[{M}])[{M}].[{M}].[{M}]>>C(C(=O)[{M}])(CO_[{M}])([{M}])O.[{M}].[{M}H]	-14.9061	87.0328
C(C([{M}])O)(O_[{M}])C[{M}].[{M}H]>>C(C([{M}])O)(O_[{M}])C.[{M}].[{M}]	29.2229	79.1437			C(C(=O)[{M}])(CO_[{M}])([{M}])O>>C(=O)(C(=O)CO_[{M}])[{M}].[{M}H]	38.0935	86.7724
C(C([{M}])O)(O_[{M}])C.[{M}H]>>C(O_[{M}])(CO_[{M}])C.[{M}]	56.6594	103.37			C(=O)(C(=O)CO_[{M}])[{M}].[{M}].[{M}]>>C(=O)([{M}])[{M}].C(=O)(CO_[{M}])[{M}]	-119.788	74.2951
C(O_[{M}])(CO_[{M}])C>>C(CO)(O)C.[{M}].[{M}]	38.1286	0			C(=O)([{M}])[{M}]>>O=[C:].[{M}].[{M}]	102.221	0
the above pathway is of length 6 and contains					the above pathway is of length 8 and contains
rule OHadsorption2 occurs 1 times					rule OHadsorption2 occurs 1 times
rule OHdesorption2 occurs 1 times					rule CHscission occurs 1 times
rule CHscission2 occurs 1 times					rule CHscission2 occurs 1 times
rule CHformation occurs 1 times					rule CHscission4 occurs 1 times
rule CHformation2 occurs 1 times					rule CCscission occurs 1 times
rule COScission occurs 1 times					rule OHscission occurs 1 times
Max Ea is			134.871		rule CdoubleOFromCOH occurs 1 times
					rule CarbonMonoxideFormation occurs 1 times
C(CO)(CO)O.[{M}].[{M}]>>C(O_[{M}])(CO)CO_[{M}]	-36.8737	0			Max Ea is			87.4123
C(O_[{M}])(CO)CO_[{M}].[{M}].[{M}]>>C(O_[{M}])(CO[{M}])CO_[{M}].[{M}H]	17.4241	68.9967
C(O_[{M}])(CO[{M}])CO_[{M}].[{M}].[{M}]>>C(O_[{M}])(C[{M}])CO_[{M}].O([{M}])[{M}]	-29.3914	155.673			C(CO)(CO)O.[{M}].[{M}]>>C(O_[{M}])(CO)CO_[{M}]	-36.8737	0
C(O_[{M}])(C[{M}])CO_[{M}].[{M}].[{M}]>>C(C([{M}])O)(O_[{M}])C[{M}].[{M}].[{M}H]	-56.6594	44.4444			C(O_[{M}])(CO)CO_[{M}].[{M}].[{M}]>>C(O_[{M}])(CO[{M}])CO_[{M}].[{M}H]	17.4241	68.9967
C(C([{M}])O)(O_[{M}])C[{M}].[{M}H]>>C(C([{M}])O)(O_[{M}])C.[{M}].[{M}]	29.2229	79.1437			C(O_[{M}])(CO[{M}])CO_[{M}].[{M}].[{M}]>>C(C(O_[{M}])CO_[{M}])(O[{M}])[{M}].[{M}H]	-58.3355	42.7348
C(C([{M}])O)(O_[{M}])C.[{M}H]>>C(O_[{M}])(CO_[{M}])C.[{M}]	56.6594	103.37			C(C(O_[{M}])CO_[{M}])(O[{M}])[{M}].[{M}].[{M}]>>C(=O)(C(O_[{M}])CO_[{M}])[{M}].[{M}].[{M}].[{M}H]	-64.8444	36.0957
C(O_[{M}])(CO_[{M}])C>>C(CO)(O)C.[{M}].[{M}]	38.1286	0			C(=O)(C(O_[{M}])CO_[{M}])[{M}].[{M}].[{M}]>>C(C(=O)[{M}])(CO_[{M}])([{M}])O.[{M}].[{M}H]	-14.9061	87.0328
					C(C(=O)[{M}])(CO_[{M}])([{M}])O>>C(=O)(C(=O)CO_[{M}])[{M}].[{M}H]	38.0935	86.7724
the above pathway is of length 7 and contains					C(=O)(C(=O)CO_[{M}])[{M}].[{M}].[{M}]>>C(=O)([{M}])[{M}].C(=O)(CO_[{M}])[{M}]	-119.788	74.2951
rule OHadsorption2 occurs 1 times					C(=O)([{M}])[{M}]>>O=[C:].[{M}].[{M}]	102.221	0
rule OHdesorption2 occurs 1 times
rule CHscission2 occurs 1 times					the above pathway is of length 8 and contains
rule OHscission occurs 1 times					rule OHadsorption2 occurs 1 times
rule CHformation occurs 1 times					rule CHscission occurs 1 times
rule CHformation2 occurs 1 times					rule CHscission2 occurs 1 times
rule COScission occurs 1 times					rule CHscission4 occurs 1 times
Max Ea is			155.673		rule CCscission occurs 1 times
					rule OHscission occurs 1 times
C(CO)(CO)O.[{M}].[{M}]>>C(O_[{M}])(CO)CO_[{M}]	-36.8737	0			rule CdoubleOFromCOH occurs 1 times
C(O_[{M}])(CO)CO_[{M}].[{M}].[{M}]>>C(C(O_[{M}])CO_[{M}])([{M}])O.[{M}H]	-79.7489	20.8931			rule CarbonMonoxideFormation occurs 1 times
C(C(O_[{M}])CO_[{M}])([{M}])O.[{M}].[{M}]>>C(C([{M}])O)(CO[{M}])O_[{M}].[{M}].[{M}H]	40.5136	88.8537			Max Ea is			87.0328
C(C([{M}])O)(CO[{M}])O_[{M}].[{M}].[{M}]>>C(C([{M}])O)(O_[{M}])C[{M}].O([{M}])[{M}]	-29.3914	155.673
C(C([{M}])O)(O_[{M}])C[{M}].[{M}H]>>C(C([{M}])O)(O_[{M}])C.[{M}].[{M}]	29.2229	79.1437			C(CO)(CO)O.[{M}].[{M}]>>C(O_[{M}])(CO)CO_[{M}]	-36.8737	0
C(C([{M}])O)(O_[{M}])C.[{M}H]>>C(O_[{M}])(CO_[{M}])C.[{M}]	56.6594	103.37			C(O_[{M}])(CO)CO_[{M}].[{M}].[{M}]>>C(C(O_[{M}])CO_[{M}])([{M}])O.[{M}H]	-79.7489	20.8931
C(O_[{M}])(CO_[{M}])C>>C(CO)(O)C.[{M}].[{M}]	38.1286	0			C(C(O_[{M}])CO_[{M}])([{M}])O.[{M}].[{M}]>>C(C(O_[{M}])CO_[{M}])(O[{M}])[{M}].[{M}H]	38.8376	87.4123
					C(C(O_[{M}])CO_[{M}])(O[{M}])[{M}]>>C(=O)(C(O_[{M}])CO_[{M}])[{M}].[{M}H]	-64.8444	36.0957
the above pathway is of length 7 and contains					C(=O)(C(O_[{M}])CO_[{M}])[{M}].[{M}].[{M}]>>C(C(=O)[{M}])(CO_[{M}])([{M}])O.[{M}].[{M}H]	-14.9061	87.0328
rule OHadsorption2 occurs 1 times					C(C(=O)[{M}])(CO_[{M}])([{M}])O>>C(=O)(C(=O)CO_[{M}])[{M}].[{M}H]	38.0935	86.7724
rule OHdesorption2 occurs 1 times					C(=O)(C(=O)CO_[{M}])[{M}].[{M}].[{M}]>>C(=O)([{M}])[{M}].C(=O)(CO_[{M}])[{M}]	-119.788	74.2951
rule CHscission occurs 1 times					C(=O)([{M}])[{M}]>>O=[C:].[{M}].[{M}]	102.221	0
rule OHscission2 occurs 1 times
rule CHformation occurs 1 times					the above pathway is of length 8 and contains
rule CHformation2 occurs 1 times					rule OHadsorption2 occurs 1 times
rule COScission occurs 1 times					rule CHscission occurs 1 times
Max Ea is			155.673		rule CHscission2 occurs 1 times
					rule CCscission occurs 1 times
C(CO)(CO)O.[{M}].[{M}]>>C(O_[{M}])(CO)CO_[{M}]	-36.8737	0			rule OHscission occurs 1 times
C(O_[{M}])(CO)CO_[{M}].[{M}].[{M}]>>C(O_[{M}])(CO[{M}])CO_[{M}].[{M}H]	17.4241	68.9967			rule CdoubleOFormation occurs 1 times
C(O_[{M}])(CO[{M}])CO_[{M}].[{M}].[{M}]>>C(C([{M}])O)(CO[{M}])O_[{M}].[{M}].[{M}H]	-56.6594	44.4444			rule CdoubleOFromCOH occurs 1 times
C(C([{M}])O)(CO[{M}])O_[{M}].[{M}].[{M}]>>C(C([{M}])O)(O_[{M}])C[{M}].O([{M}])[{M}]	-29.3914	155.673			rule CarbonMonoxideFormation occurs 1 times
C(C([{M}])O)(O_[{M}])C[{M}].[{M}H]>>C(C([{M}])O)(O_[{M}])C.[{M}].[{M}]	29.2229	79.1437			Max Ea is			87.4123
C(C([{M}])O)(O_[{M}])C.[{M}H]>>C(O_[{M}])(CO_[{M}])C.[{M}]	56.6594	103.37
C(O_[{M}])(CO_[{M}])C>>C(CO)(O)C.[{M}].[{M}]	38.1286	0			C(CO)(CO)O.[{M}].[{M}]>>C(O_[{M}])(CO)CO_[{M}]	-36.8737	0
					C(O_[{M}])(CO)CO_[{M}].[{M}].[{M}]>>C(O_[{M}])(CO[{M}])CO_[{M}].[{M}H]	17.4241	68.9967
the above pathway is of length 7 and contains					C(O_[{M}])(CO[{M}])CO_[{M}].[{M}].[{M}]>>C(C(O_[{M}])CO_[{M}])(O[{M}])[{M}].[{M}H]	-58.3355	42.7348
rule OHadsorption2 occurs 1 times					C(C(O_[{M}])CO_[{M}])(O[{M}])[{M}]>>C(=O)(C(O_[{M}])CO_[{M}])[{M}].[{M}H]	-64.8444	36.0957
rule OHdesorption2 occurs 1 times					C(=O)(C(O_[{M}])CO_[{M}])[{M}].[{M}].[{M}]>>C(C(=O)[{M}])(CO_[{M}])([{M}])O.[{M}].[{M}H]	-14.9061	87.0328
rule CHscission2 occurs 1 times					C(C(=O)[{M}])(CO_[{M}])([{M}])O>>C(=O)(C(=O)CO_[{M}])[{M}].[{M}H]	38.0935	86.7724
rule OHscission occurs 1 times					C(=O)(C(=O)CO_[{M}])[{M}].[{M}].[{M}]>>C(=O)([{M}])[{M}].C(=O)(CO_[{M}])[{M}]	-119.788	74.2951
rule CHformation occurs 1 times					C(=O)([{M}])[{M}]>>O=[C:].[{M}].[{M}]	102.221	0
rule CHformation2 occurs 1 times
rule COScission occurs 1 times					the above pathway is of length 8 and contains
Max Ea is			155.673		rule OHadsorption2 occurs 1 times
					rule CHscission occurs 1 times
C(CO)(CO)O.[{M}].[{M}]>>C(O_[{M}])(CO)CO_[{M}]	-36.8737	0			rule CHscission2 occurs 1 times
C(O_[{M}])(CO)CO_[{M}].[{M}].[{M}]>>C(CO_[{M}])(CO_[{M}])([{M}])O.[{M}H]	-51.7113	49.4915			rule CCscission occurs 1 times
C(CO_[{M}])(CO_[{M}])([{M}])O.[{M}].[{M}]>>C(CO_[{M}])(C[{M}])([{M}])O.[{M}]O.[{M}]	40.0797	165.579			rule OHscission occurs 1 times
C(CO_[{M}])(C[{M}])([{M}])O.[{M}H]>>C(CO_[{M}])([{M}])(O)C.[{M}].[{M}]	7.80945	60.7281			rule CdoubleOFormation occurs 1 times
C(CO_[{M}])([{M}])(O)C.[{M}H]>>C(O_[{M}])(CO_[{M}])C.[{M}]	28.6218	102.809			rule CdoubleOFromCOH occurs 1 times
C(O_[{M}])(CO_[{M}])C>>C(CO)(O)C.[{M}].[{M}]	38.1286	0			rule CarbonMonoxideFormation occurs 1 times
					Max Ea is			87.0328
the above pathway is of length 6 and contains
rule OHadsorption2 occurs 1 times					C(CO)(CO)O.[{M}].[{M}]>>C(O_[{M}])(CO)CO_[{M}]	-36.8737	0
rule OHdesorption2 occurs 1 times					C(O_[{M}])(CO)CO_[{M}].[{M}].[{M}]>>C(C(O_[{M}])CO_[{M}])([{M}])O.[{M}H]	-79.7489	20.8931
rule CHscission7 occurs 1 times					C(C(O_[{M}])CO_[{M}])([{M}])O.[{M}].[{M}]>>C(C([{M}])O)(CO_[{M}])([{M}])O.[{M}].[{M}H]	-7.20837	94.8845
rule CHformation occurs 1 times					C(C([{M}])O)(CO_[{M}])([{M}])O>>C(C=O)(CO_[{M}])([{M}])O.[{M}H]	-7.50427	47.5583
rule CHformation2 occurs 1 times					C(C=O)(CO_[{M}])([{M}])O.[{M}].[{M}]>>C(C(=O)[{M}])(CO_[{M}])([{M}])O.[{M}H]	-26.2004	75.5126
rule COScission2 occurs 1 times					C(C(=O)[{M}])(CO_[{M}])([{M}])O>>C(=O)(C(=O)CO_[{M}])[{M}].[{M}H]	38.0935	86.7724
Max Ea is			165.579		C(=O)(C(=O)CO_[{M}])[{M}].[{M}].[{M}]>>C(=O)([{M}])[{M}].C(=O)(CO_[{M}])[{M}]	-119.788	74.2951
					C(=O)([{M}])[{M}]>>O=[C:].[{M}].[{M}]	102.221	0
C(CO)(CO)O.[{M}].[{M}]>>C(O_[{M}])(CO)CO_[{M}]	-36.8737	0
C(O_[{M}])(CO)CO_[{M}].[{M}].[{M}]>>C(O_[{M}])(C[{M}])CO_[{M}].[{M}]O	-4.42321	134.871			the above pathway is of length 8 and contains
C(O_[{M}])(C[{M}])CO_[{M}].[{M}].[{M}]>>C(CO_[{M}])(C[{M}])([{M}])O.[{M}].[{M}H]	-7.20837	94.8845			rule OHadsorption2 occurs 1 times
C(CO_[{M}])(C[{M}])([{M}])O.[{M}H]>>C(CO_[{M}])([{M}])(O)C.[{M}].[{M}]	7.80945	60.7281			rule CHscission occurs 2 times
C(CO_[{M}])([{M}])(O)C.[{M}H]>>C(O_[{M}])(CO_[{M}])C.[{M}]	28.6218	102.809			rule CHscission2 occurs 1 times
C(O_[{M}])(CO_[{M}])C>>C(CO)(O)C.[{M}].[{M}]	38.1286	0			rule CCscission occurs 1 times
					rule CdoubleOFromCOH occurs 2 times
the above pathway is of length 6 and contains					rule CarbonMonoxideFormation occurs 1 times
rule OHadsorption2 occurs 1 times					Max Ea is			94.8845
rule OHdesorption2 occurs 1 times
rule CHscission2 occurs 1 times					C(CO)(CO)O.[{M}].[{M}]>>C(O_[{M}])(CO)CO_[{M}]	-36.8737	0
rule CHformation occurs 1 times					C(O_[{M}])(CO)CO_[{M}].[{M}].[{M}]>>C(CO_[{M}])(CO_[{M}])([{M}])O.[{M}H]	-51.7113	49.4915
rule CHformation2 occurs 1 times					C(CO_[{M}])(CO_[{M}])([{M}])O.[{M}].[{M}]>>C(C([{M}])O)(CO_[{M}])([{M}])O.[{M}].[{M}H]	-35.246	66.2861
rule COScission occurs 1 times					C(C([{M}])O)(CO_[{M}])([{M}])O>>C(C=O)(CO_[{M}])([{M}])O.[{M}H]	-7.50427	47.5583
Max Ea is			134.871		C(C=O)(CO_[{M}])([{M}])O.[{M}].[{M}]>>C(C(=O)[{M}])(CO_[{M}])([{M}])O.[{M}H]	-26.2004	75.5126
					C(C(=O)[{M}])(CO_[{M}])([{M}])O>>C(=O)(C(=O)CO_[{M}])[{M}].[{M}H]	38.0935	86.7724
C(CO)(CO)O.[{M}].[{M}]>>C(O_[{M}])(CO)CO_[{M}]	-36.8737	0			C(=O)(C(=O)CO_[{M}])[{M}].[{M}].[{M}]>>C(=O)([{M}])[{M}].C(=O)(CO_[{M}])[{M}]	-119.788	74.2951
C(O_[{M}])(CO)CO_[{M}].[{M}].[{M}]>>C(O_[{M}])(CO[{M}])CO_[{M}].[{M}H]	17.4241	68.9967			C(=O)([{M}])[{M}]>>O=[C:].[{M}].[{M}]	102.221	0
C(O_[{M}])(CO[{M}])CO_[{M}].[{M}].[{M}]>>C(O_[{M}])(C[{M}])CO_[{M}].O([{M}])[{M}]	-29.3914	155.673
C(O_[{M}])(C[{M}])CO_[{M}].[{M}].[{M}]>>C(CO_[{M}])(C[{M}])([{M}])O.[{M}].[{M}H]	-7.20837	94.8845			the above pathway is of length 8 and contains
C(CO_[{M}])(C[{M}])([{M}])O.[{M}H]>>C(CO_[{M}])([{M}])(O)C.[{M}].[{M}]	7.80945	60.7281			rule OHadsorption2 occurs 1 times
C(CO_[{M}])([{M}])(O)C.[{M}H]>>C(O_[{M}])(CO_[{M}])C.[{M}]	28.6218	102.809			rule CHscission occurs 1 times
C(O_[{M}])(CO_[{M}])C>>C(CO)(O)C.[{M}].[{M}]	38.1286	0			rule CHscission2 occurs 1 times
					rule CHscission7 occurs 1 times
the above pathway is of length 7 and contains					rule CCscission occurs 1 times
rule OHadsorption2 occurs 1 times					rule CdoubleOFromCOH occurs 2 times
rule OHdesorption2 occurs 1 times					rule CarbonMonoxideFormation occurs 1 times
rule CHscission2 occurs 1 times					Max Ea is			86.7724
rule OHscission occurs 1 times
rule CHformation occurs 1 times					C(CO)(CO)O.[{M}].[{M}]>>C(O_[{M}])(CO)CO_[{M}]	-36.8737	0
rule CHformation2 occurs 1 times					C(O_[{M}])(CO)CO_[{M}].[{M}].[{M}]>>C(C(O_[{M}])CO_[{M}])([{M}])O.[{M}H]	-79.7489	20.8931
rule COScission occurs 1 times					C(C(O_[{M}])CO_[{M}])([{M}])O.[{M}].[{M}]>>C(C(O_[{M}])CO_[{M}])(O[{M}])[{M}].[{M}H]	38.8376	87.4123
Max Ea is			155.673		C(C(O_[{M}])CO_[{M}])(O[{M}])[{M}].[{M}].[{M}]>>C(C=O)(CO_[{M}])([{M}])O.[{M}].[{M}].[{M}].[{M}H]	-53.5502	47.6158
					C(C=O)(CO_[{M}])([{M}])O.[{M}].[{M}]>>C(C(=O)[{M}])(CO_[{M}])([{M}])O.[{M}H]	-26.2004	75.5126
C(CO)(CO)O.[{M}].[{M}]>>C(O_[{M}])(CO)CO_[{M}]	-36.8737	0			C(C(=O)[{M}])(CO_[{M}])([{M}])O>>C(=O)(C(=O)CO_[{M}])[{M}].[{M}H]	38.0935	86.7724
C(O_[{M}])(CO)CO_[{M}].[{M}].[{M}]>>C(CO_[{M}])(CO_[{M}])([{M}])O.[{M}H]	-51.7113	49.4915			C(=O)(C(=O)CO_[{M}])[{M}].[{M}].[{M}]>>C(=O)([{M}])[{M}].C(=O)(CO_[{M}])[{M}]	-119.788	74.2951
C(CO_[{M}])(CO_[{M}])([{M}])O.[{M}].[{M}]>>C(CO[{M}])(CO_[{M}])([{M}])O.[{M}].[{M}H]	40.5136	88.8537			C(=O)([{M}])[{M}]>>O=[C:].[{M}].[{M}]	102.221	0
C(CO[{M}])(CO_[{M}])([{M}])O.[{M}].[{M}]>>C(CO_[{M}])(C[{M}])([{M}])O.O([{M}])[{M}]	-7.97797	173.66
C(CO_[{M}])(C[{M}])([{M}])O.[{M}H]>>C(CO_[{M}])([{M}])(O)C.[{M}].[{M}]	7.80945	60.7281			the above pathway is of length 8 and contains
C(CO_[{M}])([{M}])(O)C.[{M}H]>>C(O_[{M}])(CO_[{M}])C.[{M}]	28.6218	102.809			rule OHadsorption2 occurs 1 times
C(O_[{M}])(CO_[{M}])C>>C(CO)(O)C.[{M}].[{M}]	38.1286	0			rule CHscission occurs 2 times
					rule CHscission5 occurs 1 times
the above pathway is of length 7 and contains					rule CCscission occurs 1 times
rule OHadsorption2 occurs 1 times					rule OHscission occurs 1 times
rule OHdesorption2 occurs 1 times					rule CdoubleOFromCOH occurs 1 times
rule CHscission7 occurs 1 times					rule CarbonMonoxideFormation occurs 1 times
rule OHscission2 occurs 1 times					Max Ea is			87.4123
rule CHformation occurs 1 times
rule CHformation2 occurs 1 times					C(CO)(CO)O.[{M}].[{M}]>>C(O_[{M}])(CO)CO_[{M}]	-36.8737	0
rule COScission occurs 1 times					C(O_[{M}])(CO)CO_[{M}].[{M}].[{M}]>>C(O_[{M}])(CO[{M}])CO_[{M}].[{M}H]	17.4241	68.9967
Max Ea is			173.66		C(O_[{M}])(CO[{M}])CO_[{M}].[{M}].[{M}]>>C(C(O_[{M}])CO_[{M}])(O[{M}])[{M}].[{M}H]	-58.3355	42.7348
					C(C(O_[{M}])CO_[{M}])(O[{M}])[{M}].[{M}].[{M}]>>C(C=O)(CO_[{M}])([{M}])O.[{M}].[{M}].[{M}].[{M}H]	-53.5502	47.6158
C(CO)(CO)O.[{M}].[{M}]>>C(O_[{M}])(CO)CO_[{M}]	-36.8737	0			C(C=O)(CO_[{M}])([{M}])O.[{M}].[{M}]>>C(C(=O)[{M}])(CO_[{M}])([{M}])O.[{M}H]	-26.2004	75.5126
C(O_[{M}])(CO)CO_[{M}].[{M}].[{M}]>>C(O_[{M}])(CO[{M}])CO_[{M}].[{M}H]	17.4241	68.9967			C(C(=O)[{M}])(CO_[{M}])([{M}])O>>C(=O)(C(=O)CO_[{M}])[{M}].[{M}H]	38.0935	86.7724
C(O_[{M}])(CO[{M}])CO_[{M}].[{M}].[{M}]>>C(CO[{M}])(CO_[{M}])([{M}])O.[{M}].[{M}H]	-28.6218	73.0428			C(=O)(C(=O)CO_[{M}])[{M}].[{M}].[{M}]>>C(=O)([{M}])[{M}].C(=O)(CO_[{M}])[{M}]	-119.788	74.2951
C(CO[{M}])(CO_[{M}])([{M}])O.[{M}].[{M}]>>C(CO_[{M}])(C[{M}])([{M}])O.O([{M}])[{M}]	-7.97797	173.66			C(=O)([{M}])[{M}]>>O=[C:].[{M}].[{M}]	102.221	0
C(CO_[{M}])(C[{M}])([{M}])O.[{M}H]>>C(CO_[{M}])([{M}])(O)C.[{M}].[{M}]	7.80945	60.7281
C(CO_[{M}])([{M}])(O)C.[{M}H]>>C(O_[{M}])(CO_[{M}])C.[{M}]	28.6218	102.809			the above pathway is of length 8 and contains
C(O_[{M}])(CO_[{M}])C>>C(CO)(O)C.[{M}].[{M}]	38.1286	0			rule OHadsorption2 occurs 1 times
					rule CHscission occurs 2 times
the above pathway is of length 7 and contains					rule CHscission5 occurs 1 times
rule OHadsorption2 occurs 1 times					rule CCscission occurs 1 times
rule OHdesorption2 occurs 1 times					rule OHscission occurs 1 times
rule CHscission2 occurs 1 times					rule CdoubleOFromCOH occurs 1 times
rule OHscission occurs 1 times					rule CarbonMonoxideFormation occurs 1 times
rule CHformation occurs 1 times					Max Ea is			86.7724
rule CHformation2 occurs 1 times
rule COScission occurs 1 times					C(CO)(CO)O.[{M}].[{M}]>>C(O_[{M}])(CO)CO_[{M}]	-36.8737	0
Max Ea is			173.66		C(O_[{M}])(CO)CO_[{M}].[{M}].[{M}]>>C(CO_[{M}])(CO_[{M}])([{M}])O.[{M}H]	-51.7113	49.4915
					C(CO_[{M}])(CO_[{M}])([{M}])O.[{M}].[{M}]>>C(CO[{M}])(CO_[{M}])([{M}])O.[{M}].[{M}H]	40.5136	88.8537
C(CO)(CO)O.[{M}].[{M}]>>C(O_[{M}])(CO)CO_[{M}]	-36.8737	0			C(CO[{M}])(CO_[{M}])([{M}])O>>C(C=O)(CO_[{M}])([{M}])O.[{M}H]	-83.2639	17.3079
C(O_[{M}])(CO)CO_[{M}].[{M}].[{M}]>>C(O_[{M}])(CO[{M}])CO_[{M}].[{M}H]	17.4241	68.9967			C(C=O)(CO_[{M}])([{M}])O.[{M}].[{M}]>>C(C(=O)[{M}])(CO_[{M}])([{M}])O.[{M}H]	-26.2004	75.5126
C(O_[{M}])(CO[{M}])CO_[{M}].[{M}].[{M}]>>C(CO[{M}])(O_[{M}])C[{M}].[{M}]O.[{M}]	18.6663	150.803			C(C(=O)[{M}])(CO_[{M}])([{M}])O>>C(=O)(C(=O)CO_[{M}])[{M}].[{M}H]	38.0935	86.7724
C(CO[{M}])(O_[{M}])C[{M}].[{M}H]>>C(CO[{M}])(O_[{M}])C.[{M}].[{M}]	29.2229	79.1437			C(=O)(C(=O)CO_[{M}])[{M}].[{M}].[{M}]>>C(=O)([{M}])[{M}].C(=O)(CO_[{M}])[{M}]	-119.788	74.2951
C(CO[{M}])(O_[{M}])C.[{M}H]>>C(O_[{M}])(CO_[{M}])C.[{M}]	-40.5136	59.6839			C(=O)([{M}])[{M}]>>O=[C:].[{M}].[{M}]	102.221	0
C(O_[{M}])(CO_[{M}])C>>C(CO)(O)C.[{M}].[{M}]	38.1286	0
					the above pathway is of length 8 and contains
the above pathway is of length 6 and contains					rule OHadsorption2 occurs 1 times
rule OHadsorption2 occurs 1 times					rule CHscission occurs 1 times
rule OHdesorption2 occurs 1 times					rule CHscission7 occurs 1 times
rule OHscission occurs 1 times					rule CCscission occurs 1 times
rule CHformation occurs 1 times					rule OHscission2 occurs 1 times
rule OHformation2 occurs 1 times					rule CdoubleOFormation occurs 1 times
rule COScission2 occurs 1 times					rule CdoubleOFromCOH occurs 1 times
Max Ea is			150.803		rule CarbonMonoxideFormation occurs 1 times
					Max Ea is			88.8537
C(CO)(CO)O.[{M}].[{M}]>>C(O_[{M}])(CO)CO_[{M}]	-36.8737	0
C(O_[{M}])(CO)CO_[{M}].[{M}].[{M}]>>C(O_[{M}])(C[{M}])CO_[{M}].[{M}]O	-4.42321	134.871			C(CO)(CO)O.[{M}].[{M}]>>C(O_[{M}])(CO)CO_[{M}]	-36.8737	0
C(O_[{M}])(C[{M}])CO_[{M}].[{M}].[{M}]>>C(CO[{M}])(O_[{M}])C[{M}].[{M}].[{M}H]	40.5136	88.8537			C(O_[{M}])(CO)CO_[{M}].[{M}].[{M}]>>C(O_[{M}])(CO[{M}])CO_[{M}].[{M}H]	17.4241	68.9967
C(CO[{M}])(O_[{M}])C[{M}].[{M}H]>>C(CO[{M}])(O_[{M}])C.[{M}].[{M}]	29.2229	79.1437			C(O_[{M}])(CO[{M}])CO_[{M}].[{M}].[{M}]>>C(CO[{M}])(CO_[{M}])([{M}])O.[{M}].[{M}H]	-28.6218	73.0428
C(CO[{M}])(O_[{M}])C.[{M}H]>>C(O_[{M}])(CO_[{M}])C.[{M}]	-40.5136	59.6839			C(CO[{M}])(CO_[{M}])([{M}])O>>C(C=O)(CO_[{M}])([{M}])O.[{M}H]	-83.2639	17.3079
C(O_[{M}])(CO_[{M}])C>>C(CO)(O)C.[{M}].[{M}]	38.1286	0			C(C=O)(CO_[{M}])([{M}])O.[{M}].[{M}]>>C(C(=O)[{M}])(CO_[{M}])([{M}])O.[{M}H]	-26.2004	75.5126
					C(C(=O)[{M}])(CO_[{M}])([{M}])O>>C(=O)(C(=O)CO_[{M}])[{M}].[{M}H]	38.0935	86.7724
the above pathway is of length 6 and contains					C(=O)(C(=O)CO_[{M}])[{M}].[{M}].[{M}]>>C(=O)([{M}])[{M}].C(=O)(CO_[{M}])[{M}]	-119.788	74.2951
rule OHadsorption2 occurs 1 times					C(=O)([{M}])[{M}]>>O=[C:].[{M}].[{M}]	102.221	0
rule OHdesorption2 occurs 1 times
rule OHscission2 occurs 1 times					the above pathway is of length 8 and contains
rule CHformation occurs 1 times					rule OHadsorption2 occurs 1 times
rule OHformation2 occurs 1 times					rule CHscission occurs 1 times
rule COScission occurs 1 times					rule CHscission2 occurs 1 times
Max Ea is			134.871		rule CCscission occurs 1 times
					rule OHscission occurs 1 times
C(CO)(CO)O.[{M}].[{M}]>>C(O_[{M}])(CO)CO_[{M}]	-36.8737	0			rule CdoubleOFormation occurs 1 times
C(O_[{M}])(CO)CO_[{M}].[{M}].[{M}]>>C(O_[{M}])(CO[{M}])CO_[{M}].[{M}H]	17.4241	68.9967			rule CdoubleOFromCOH occurs 1 times
C(O_[{M}])(CO[{M}])CO_[{M}].[{M}].[{M}]>>C(O_[{M}])(C[{M}])CO_[{M}].O([{M}])[{M}]	-29.3914	155.673			rule CarbonMonoxideFormation occurs 1 times
C(O_[{M}])(C[{M}])CO_[{M}].[{M}].[{M}]>>C(CO[{M}])(O_[{M}])C[{M}].[{M}].[{M}H]	40.5136	88.8537			Max Ea is			86.7724
C(CO[{M}])(O_[{M}])C[{M}].[{M}H]>>C(CO[{M}])(O_[{M}])C.[{M}].[{M}]	29.2229	79.1437
C(CO[{M}])(O_[{M}])C.[{M}H]>>C(O_[{M}])(CO_[{M}])C.[{M}]	-40.5136	59.6839			C(CO)(CO)O.[{M}].[{M}]>>C(O_[{M}])(CO)CO_[{M}]	-36.8737	0
C(O_[{M}])(CO_[{M}])C>>C(CO)(O)C.[{M}].[{M}]	38.1286	0			C(O_[{M}])(CO)CO_[{M}].[{M}].[{M}]>>C(C(O_[{M}])CO_[{M}])([{M}])O.[{M}H]	-79.7489	20.8931
					C(C(O_[{M}])CO_[{M}])([{M}])O.[{M}].[{M}]>>C(C(O_[{M}])CO_[{M}])([{M}])([{M}])O.[{M}H]	-20.408	81.4208
the above pathway is of length 7 and contains					C(C(O_[{M}])CO_[{M}])([{M}])([{M}])O.[{M}].[{M}]>>C(C(O[{M}])CO_[{M}])([{M}])([{M}])O.[{M}].[{M}H]	46.4003	93.9163
rule OHadsorption2 occurs 1 times					C(C(O[{M}])CO_[{M}])([{M}])([{M}])O>>C(=O)(C(CO_[{M}])O[{M}])[{M}].[{M}H]	-5.59888	49.197
rule OHdesorption2 occurs 1 times					C(=O)(C(CO_[{M}])O[{M}])[{M}]>>C(=O)(C(=O)CO_[{M}])[{M}].[{M}H]	-23.2129	78.5599
rule OHscission occurs 1 times					C(=O)(C(=O)CO_[{M}])[{M}].[{M}].[{M}]>>C(=O)([{M}])[{M}].C(=O)(CO_[{M}])[{M}]	-119.788	74.2951
rule OHscission2 occurs 1 times					C(=O)([{M}])[{M}]>>O=[C:].[{M}].[{M}]	102.221	0
rule CHformation occurs 1 times
rule OHformation2 occurs 1 times					the above pathway is of length 8 and contains
rule COScission occurs 1 times					rule OHadsorption2 occurs 1 times
Max Ea is			155.673		rule CHscission occurs 2 times
					rule CCscission occurs 1 times
C(CO)(CO)O.[{M}].[{M}]>>C(O_[{M}])(CO)CO_[{M}]	-36.8737	0			rule OHscission2 occurs 1 times
C(O_[{M}])(CO)CO_[{M}].[{M}].[{M}]>>C(O_[{M}])(CO[{M}])CO_[{M}].[{M}H]	17.4241	68.9967			rule CdoubleOFormation occurs 1 times
C(O_[{M}])(CO[{M}])CO_[{M}].[{M}].[{M}]>>C(O_[{M}])(CO[{M}])CO[{M}].[{M}].[{M}H]	40.5136	88.8537			rule CdoubleOFromCOH occurs 1 times
C(O_[{M}])(CO[{M}])CO[{M}].[{M}].[{M}]>>C(CO[{M}])(O_[{M}])C[{M}].O([{M}])[{M}]	-29.3914	155.673			rule CarbonMonoxideFormation occurs 1 times
C(CO[{M}])(O_[{M}])C[{M}].[{M}H]>>C(CO[{M}])(O_[{M}])C.[{M}].[{M}]	29.2229	79.1437			Max Ea is			93.9163
C(CO[{M}])(O_[{M}])C.[{M}H]>>C(O_[{M}])(CO_[{M}])C.[{M}]	-40.5136	59.6839
C(O_[{M}])(CO_[{M}])C>>C(CO)(O)C.[{M}].[{M}]	38.1286	0			C(CO)(CO)O.[{M}].[{M}]>>C(O_[{M}])(CO)CO_[{M}]	-36.8737	0
					C(O_[{M}])(CO)CO_[{M}].[{M}].[{M}]>>C(C(O_[{M}])CO_[{M}])([{M}])O.[{M}H]	-79.7489	20.8931
the above pathway is of length 7 and contains					C(C(O_[{M}])CO_[{M}])([{M}])O.[{M}].[{M}]>>C(C([{M}])O)(CO_[{M}])O[{M}].[{M}].[{M}H]	46.4003	93.9163
rule OHadsorption2 occurs 1 times					C(C([{M}])O)(CO_[{M}])O[{M}].[{M}].[{M}]>>C(C(O[{M}])CO_[{M}])([{M}])([{M}])O.[{M}H]	-20.408	81.4208
rule OHdesorption2 occurs 1 times					C(C(O[{M}])CO_[{M}])([{M}])([{M}])O>>C(=O)(C(CO_[{M}])O[{M}])[{M}].[{M}H]	-5.59888	49.197
rule OHscission occurs 1 times					C(=O)(C(CO_[{M}])O[{M}])[{M}]>>C(=O)(C(=O)CO_[{M}])[{M}].[{M}H]	-23.2129	78.5599
rule OHscission2 occurs 1 times					C(=O)(C(=O)CO_[{M}])[{M}].[{M}].[{M}]>>C(=O)([{M}])[{M}].C(=O)(CO_[{M}])[{M}]	-119.788	74.2951
rule CHformation occurs 1 times					C(=O)([{M}])[{M}]>>O=[C:].[{M}].[{M}]	102.221	0
rule OHformation2 occurs 1 times
rule COScission occurs 1 times					the above pathway is of length 8 and contains
Max Ea is			155.673		rule OHadsorption2 occurs 1 times
					rule CHscission occurs 2 times
C(CO)(CO)O.[{M}].[{M}]>>C(O_[{M}])(CO)CO_[{M}]	-36.8737	0			rule CCscission occurs 1 times
C(O_[{M}])(CO)CO_[{M}].[{M}].[{M}]>>C(O[{M}])(CO_[{M}])CO_[{M}].[{M}H]	23.3108	74.0593			rule OHscission2 occurs 1 times
C(O[{M}])(CO_[{M}])CO_[{M}].[{M}].[{M}]>>C(CO_[{M}])(O[{M}])C[{M}].[{M}]O.[{M}]	18.6663	150.803			rule CdoubleOFormation occurs 1 times
C(CO_[{M}])(O[{M}])C[{M}].[{M}H]>>C(CO_[{M}])(O[{M}])C.[{M}].[{M}]	29.2229	79.1437			rule CdoubleOFromCOH occurs 1 times
C(CO_[{M}])(O[{M}])C.[{M}H]>>C(O_[{M}])(CO_[{M}])C.[{M}]	-46.4003	60.508			rule CarbonMonoxideFormation occurs 1 times
C(O_[{M}])(CO_[{M}])C>>C(CO)(O)C.[{M}].[{M}]	38.1286	0			Max Ea is			93.9163
the above pathway is of length 6 and contains					C(CO)(CO)O.[{M}].[{M}]>>C(O_[{M}])(CO)CO_[{M}]	-36.8737	0
rule OHadsorption2 occurs 1 times					C(O_[{M}])(CO)CO_[{M}].[{M}].[{M}]>>C(O[{M}])(CO_[{M}])CO_[{M}].[{M}H]	23.3108	74.0593
rule OHdesorption2 occurs 1 times					C(O[{M}])(CO_[{M}])CO_[{M}].[{M}].[{M}]>>C(C([{M}])O)(CO_[{M}])O[{M}].[{M}].[{M}H]	-56.6594	44.4444
rule OHscission4 occurs 1 times					C(C([{M}])O)(CO_[{M}])O[{M}].[{M}].[{M}]>>C(C(O[{M}])CO_[{M}])([{M}])([{M}])O.[{M}H]	-20.408	81.4208
rule CHformation occurs 1 times					C(C(O[{M}])CO_[{M}])([{M}])([{M}])O>>C(=O)(C(CO_[{M}])O[{M}])[{M}].[{M}H]	-5.59888	49.197
rule OHformation2 occurs 1 times					C(=O)(C(CO_[{M}])O[{M}])[{M}]>>C(=O)(C(=O)CO_[{M}])[{M}].[{M}H]	-23.2129	78.5599
rule COScission2 occurs 1 times					C(=O)(C(=O)CO_[{M}])[{M}].[{M}].[{M}]>>C(=O)([{M}])[{M}].C(=O)(CO_[{M}])[{M}]	-119.788	74.2951
Max Ea is			150.803		C(=O)([{M}])[{M}]>>O=[C:].[{M}].[{M}]	102.221	0
C(CO)(CO)O.[{M}].[{M}]>>C(O_[{M}])(CO)CO_[{M}]	-36.8737	0			the above pathway is of length 8 and contains
C(O_[{M}])(CO)CO_[{M}].[{M}].[{M}]>>C(O_[{M}])(C[{M}])CO_[{M}].[{M}]O	-4.42321	134.871			rule OHadsorption2 occurs 1 times
C(O_[{M}])(C[{M}])CO_[{M}].[{M}].[{M}]>>C(CO_[{M}])(O[{M}])C[{M}].[{M}].[{M}H]	46.4003	93.9163			rule CHscission occurs 1 times
C(CO_[{M}])(O[{M}])C[{M}].[{M}H]>>C(CO_[{M}])(O[{M}])C.[{M}].[{M}]	29.2229	79.1437			rule CHscission2 occurs 1 times
C(CO_[{M}])(O[{M}])C.[{M}H]>>C(O_[{M}])(CO_[{M}])C.[{M}]	-46.4003	60.508			rule CCscission occurs 1 times
C(O_[{M}])(CO_[{M}])C>>C(CO)(O)C.[{M}].[{M}]	38.1286	0			rule OHscission4 occurs 1 times
					rule CdoubleOFormation occurs 1 times
the above pathway is of length 6 and contains					rule CdoubleOFromCOH occurs 1 times
rule OHadsorption2 occurs 1 times					rule CarbonMonoxideFormation occurs 1 times
rule OHdesorption2 occurs 1 times					Max Ea is			81.4208
rule OHscission2 occurs 1 times
rule CHformation occurs 1 times					C(CO)(CO)O.[{M}].[{M}]>>C(O_[{M}])(CO)CO_[{M}]	-36.8737	0
rule OHformation2 occurs 1 times					C(O_[{M}])(CO)CO_[{M}].[{M}].[{M}]>>C(C(O_[{M}])CO_[{M}])([{M}])O.[{M}H]	-79.7489	20.8931
rule COScission occurs 1 times					C(C(O_[{M}])CO_[{M}])([{M}])O.[{M}].[{M}]>>C(C(O_[{M}])CO_[{M}])([{M}])([{M}])O.[{M}H]	-20.408	81.4208
Max Ea is			134.871		C(C(O_[{M}])CO_[{M}])([{M}])([{M}])O>>C(=O)(C(O_[{M}])CO_[{M}])[{M}].[{M}H]	-5.59888	49.197
					C(=O)(C(O_[{M}])CO_[{M}])[{M}].[{M}].[{M}]>>C(=O)(C(CO_[{M}])O[{M}])[{M}].[{M}].[{M}H]	46.4003	93.9163
C(CO)(CO)O.[{M}].[{M}]>>C(O_[{M}])(CO)CO_[{M}]	-36.8737	0			C(=O)(C(CO_[{M}])O[{M}])[{M}]>>C(=O)(C(=O)CO_[{M}])[{M}].[{M}H]	-23.2129	78.5599
C(O_[{M}])(CO)CO_[{M}].[{M}].[{M}]>>C(O_[{M}])(CO[{M}])CO_[{M}].[{M}H]	17.4241	68.9967			C(=O)(C(=O)CO_[{M}])[{M}].[{M}].[{M}]>>C(=O)([{M}])[{M}].C(=O)(CO_[{M}])[{M}]	-119.788	74.2951
C(O_[{M}])(CO[{M}])CO_[{M}].[{M}].[{M}]>>C(O_[{M}])(C[{M}])CO_[{M}].O([{M}])[{M}]	-29.3914	155.673			C(=O)([{M}])[{M}]>>O=[C:].[{M}].[{M}]	102.221	0
C(O_[{M}])(C[{M}])CO_[{M}].[{M}].[{M}]>>C(CO_[{M}])(O[{M}])C[{M}].[{M}].[{M}H]	46.4003	93.9163
C(CO_[{M}])(O[{M}])C[{M}].[{M}H]>>C(CO_[{M}])(O[{M}])C.[{M}].[{M}]	29.2229	79.1437			the above pathway is of length 8 and contains
C(CO_[{M}])(O[{M}])C.[{M}H]>>C(O_[{M}])(CO_[{M}])C.[{M}]	-46.4003	60.508			rule OHadsorption2 occurs 1 times
C(O_[{M}])(CO_[{M}])C>>C(CO)(O)C.[{M}].[{M}]	38.1286	0			rule CHscission occurs 2 times
					rule CCscission occurs 1 times
the above pathway is of length 7 and contains					rule OHscission2 occurs 1 times
rule OHadsorption2 occurs 1 times					rule CdoubleOFormation occurs 1 times
rule OHdesorption2 occurs 1 times					rule CdoubleOFromCOH occurs 1 times
rule OHscission occurs 1 times					rule CarbonMonoxideFormation occurs 1 times
rule OHscission2 occurs 1 times					Max Ea is			93.9163
rule CHformation occurs 1 times
rule OHformation2 occurs 1 times					C(CO)(CO)O.[{M}].[{M}]>>C(O_[{M}])(CO)CO_[{M}]	-36.8737	0
rule COScission occurs 1 times					C(O_[{M}])(CO)CO_[{M}].[{M}].[{M}]>>C(C(O_[{M}])CO_[{M}])([{M}])O.[{M}H]	-79.7489	20.8931
Max Ea is			155.673		C(C(O_[{M}])CO_[{M}])([{M}])O.[{M}].[{M}]>>C(C(O_[{M}])CO_[{M}])(O[{M}])[{M}].[{M}H]	38.8376	87.4123
					C(C(O_[{M}])CO_[{M}])(O[{M}])[{M}].[{M}].[{M}]>>C(=O)(C(O_[{M}])CO_[{M}])[{M}].[{M}].[{M}].[{M}H]	-64.8444	36.0957
C(CO)(CO)O.[{M}].[{M}]>>C(O_[{M}])(CO)CO_[{M}]	-36.8737	0			C(=O)(C(O_[{M}])CO_[{M}])[{M}].[{M}].[{M}]>>C(=O)(C(CO_[{M}])O[{M}])[{M}].[{M}].[{M}H]	46.4003	93.9163
C(O_[{M}])(CO)CO_[{M}].[{M}].[{M}]>>C(O_[{M}])(CO[{M}])CO_[{M}].[{M}H]	17.4241	68.9967			C(=O)(C(CO_[{M}])O[{M}])[{M}]>>C(=O)(C(=O)CO_[{M}])[{M}].[{M}H]	-23.2129	78.5599
C(O_[{M}])(CO[{M}])CO_[{M}].[{M}].[{M}]>>C(O[{M}])(CO[{M}])CO_[{M}].[{M}].[{M}H]	46.4003	93.9163			C(=O)(C(=O)CO_[{M}])[{M}].[{M}].[{M}]>>C(=O)([{M}])[{M}].C(=O)(CO_[{M}])[{M}]	-119.788	74.2951
C(O[{M}])(CO[{M}])CO_[{M}].[{M}].[{M}]>>C(CO_[{M}])(O[{M}])C[{M}].O([{M}])[{M}]	-29.3914	155.673			C(=O)([{M}])[{M}]>>O=[C:].[{M}].[{M}]	102.221	0
C(CO_[{M}])(O[{M}])C[{M}].[{M}H]>>C(CO_[{M}])(O[{M}])C.[{M}].[{M}]	29.2229	79.1437
C(CO_[{M}])(O[{M}])C.[{M}H]>>C(O_[{M}])(CO_[{M}])C.[{M}]	-46.4003	60.508			the above pathway is of length 8 and contains
C(O_[{M}])(CO_[{M}])C>>C(CO)(O)C.[{M}].[{M}]	38.1286	0			rule OHadsorption2 occurs 1 times
					rule CHscission occurs 1 times
the above pathway is of length 7 and contains					rule CHscission4 occurs 1 times
rule OHadsorption2 occurs 1 times					rule CCscission occurs 1 times
rule OHdesorption2 occurs 1 times					rule OHscission occurs 1 times
rule OHscission occurs 1 times					rule OHscission2 occurs 1 times
rule OHscission2 occurs 1 times					rule CdoubleOFormation occurs 1 times
rule CHformation occurs 1 times					rule CarbonMonoxideFormation occurs 1 times
rule OHformation2 occurs 1 times					Max Ea is			93.9163
rule COScission occurs 1 times
Max Ea is			155.673		C(CO)(CO)O.[{M}].[{M}]>>C(O_[{M}])(CO)CO_[{M}]	-36.8737	0
					C(O_[{M}])(CO)CO_[{M}].[{M}].[{M}]>>C(O_[{M}])(CO[{M}])CO_[{M}].[{M}H]	17.4241	68.9967
C(CO)(CO)O.[{M}].[{M}]>>C(O_[{M}])(CO)CO_[{M}]	-36.8737	0			C(O_[{M}])(CO[{M}])CO_[{M}].[{M}].[{M}]>>C(C(O_[{M}])CO_[{M}])(O[{M}])[{M}].[{M}H]	-58.3355	42.7348
C(O_[{M}])(CO)CO_[{M}].[{M}].[{M}]>>C(O[{M}])(CO_[{M}])CO_[{M}].[{M}H]	23.3108	74.0593			C(C(O_[{M}])CO_[{M}])(O[{M}])[{M}].[{M}].[{M}]>>C(=O)(C(O_[{M}])CO_[{M}])[{M}].[{M}].[{M}].[{M}H]	-64.8444	36.0957
C(O[{M}])(CO_[{M}])CO_[{M}].[{M}].[{M}]>>C(O[{M}])(CO[{M}])CO_[{M}].[{M}].[{M}H]	40.5136	88.8537			C(=O)(C(O_[{M}])CO_[{M}])[{M}].[{M}].[{M}]>>C(=O)(C(CO_[{M}])O[{M}])[{M}].[{M}].[{M}H]	46.4003	93.9163
C(O[{M}])(CO[{M}])CO_[{M}].[{M}].[{M}]>>C(CO_[{M}])(O[{M}])C[{M}].O([{M}])[{M}]	-29.3914	155.673			C(=O)(C(CO_[{M}])O[{M}])[{M}]>>C(=O)(C(=O)CO_[{M}])[{M}].[{M}H]	-23.2129	78.5599
C(CO_[{M}])(O[{M}])C[{M}].[{M}H]>>C(CO_[{M}])(O[{M}])C.[{M}].[{M}]	29.2229	79.1437			C(=O)(C(=O)CO_[{M}])[{M}].[{M}].[{M}]>>C(=O)([{M}])[{M}].C(=O)(CO_[{M}])[{M}]	-119.788	74.2951
C(CO_[{M}])(O[{M}])C.[{M}H]>>C(O_[{M}])(CO_[{M}])C.[{M}]	-46.4003	60.508			C(=O)([{M}])[{M}]>>O=[C:].[{M}].[{M}]	102.221	0
C(O_[{M}])(CO_[{M}])C>>C(CO)(O)C.[{M}].[{M}]	38.1286	0
					the above pathway is of length 8 and contains
the above pathway is of length 7 and contains					rule OHadsorption2 occurs 1 times
rule OHadsorption2 occurs 1 times					rule CHscission occurs 1 times
rule OHdesorption2 occurs 1 times					rule CHscission4 occurs 1 times
rule OHscission2 occurs 1 times					rule CCscission occurs 1 times
rule OHscission4 occurs 1 times					rule OHscission occurs 1 times
rule CHformation occurs 1 times					rule OHscission2 occurs 1 times
rule OHformation2 occurs 1 times					rule CdoubleOFormation occurs 1 times
rule COScission occurs 1 times					rule CarbonMonoxideFormation occurs 1 times
Max Ea is			155.673		Max Ea is			93.9163
total valid pathways is 36					C(CO)(CO)O.[{M}].[{M}]>>C(O_[{M}])(CO)CO_[{M}]	-36.8737	0
total distinct pathways is 36					C(O_[{M}])(CO)CO_[{M}].[{M}].[{M}]>>C(C(O_[{M}])CO_[{M}])([{M}])O.[{M}H]	-79.7489	20.8931
2 pathways from C(CO)(CO)O containing					C(C(O_[{M}])CO_[{M}])([{M}])O.[{M}].[{M}]>>C(C(O_[{M}])CO_[{M}])(O[{M}])[{M}].[{M}H]	38.8376	87.4123
1of rule OHadsorption2					C(C(O_[{M}])CO_[{M}])(O[{M}])[{M}]>>C(=O)(C(O_[{M}])CO_[{M}])[{M}].[{M}H]	-64.8444	36.0957
1of rule OHdesorption2					C(=O)(C(O_[{M}])CO_[{M}])[{M}].[{M}].[{M}]>>C(=O)(C(CO_[{M}])O[{M}])[{M}].[{M}].[{M}H]	46.4003	93.9163
1of rule OHscission2					C(=O)(C(CO_[{M}])O[{M}])[{M}]>>C(=O)(C(=O)CO_[{M}])[{M}].[{M}H]	-23.2129	78.5599
1of rule CHformation					C(=O)(C(=O)CO_[{M}])[{M}].[{M}].[{M}]>>C(=O)([{M}])[{M}].C(=O)(CO_[{M}])[{M}]	-119.788	74.2951
1of rule OHformation2					C(=O)([{M}])[{M}]>>O=[C:].[{M}].[{M}]	102.221	0
1of rule COScission
					the above pathway is of length 8 and contains
2 pathways from C(CO)(CO)O containing					rule OHadsorption2 occurs 1 times
1of rule OHadsorption2					rule CHscission occurs 1 times
1of rule OHdesorption2					rule CCscission occurs 1 times
1of rule CHscission7					rule OHscission occurs 1 times
1of rule CHformation					rule OHscission2 occurs 1 times
1of rule CHformation2					rule CdoubleOFormation occurs 2 times
1of rule COScission2					rule CarbonMonoxideFormation occurs 1 times
					Max Ea is			93.9163
2 pathways from C(CO)(CO)O containing
1of rule OHadsorption2					C(CO)(CO)O.[{M}].[{M}]>>C(O_[{M}])(CO)CO_[{M}]	-36.8737	0
1of rule OHdesorption2					C(O_[{M}])(CO)CO_[{M}].[{M}].[{M}]>>C(O_[{M}])(CO[{M}])CO_[{M}].[{M}H]	17.4241	68.9967
1of rule OHscission4					C(O_[{M}])(CO[{M}])CO_[{M}].[{M}].[{M}]>>C(C(O_[{M}])CO_[{M}])(O[{M}])[{M}].[{M}H]	-58.3355	42.7348
1of rule CHformation					C(C(O_[{M}])CO_[{M}])(O[{M}])[{M}]>>C(=O)(C(O_[{M}])CO_[{M}])[{M}].[{M}H]	-64.8444	36.0957
1of rule OHformation2					C(=O)(C(O_[{M}])CO_[{M}])[{M}].[{M}].[{M}]>>C(=O)(C(CO_[{M}])O[{M}])[{M}].[{M}].[{M}H]	46.4003	93.9163
1of rule COScission2					C(=O)(C(CO_[{M}])O[{M}])[{M}]>>C(=O)(C(=O)CO_[{M}])[{M}].[{M}H]	-23.2129	78.5599
					C(=O)(C(=O)CO_[{M}])[{M}].[{M}].[{M}]>>C(=O)([{M}])[{M}].C(=O)(CO_[{M}])[{M}]	-119.788	74.2951
6 pathways from C(CO)(CO)O containing					C(=O)([{M}])[{M}]>>O=[C:].[{M}].[{M}]	102.221	0
1of rule OHadsorption2
1of rule OHdesorption2					the above pathway is of length 8 and contains
1of rule CHscission2					rule OHadsorption2 occurs 1 times
1of rule OHscission					rule CHscission occurs 1 times
1of rule CHformation					rule CCscission occurs 1 times
1of rule CHformation2					rule OHscission occurs 1 times
1of rule COScission					rule OHscission2 occurs 1 times
					rule CdoubleOFormation occurs 2 times
3 pathways from C(CO)(CO)O containing					rule CarbonMonoxideFormation occurs 1 times
1of rule OHadsorption2					Max Ea is			93.9163
1of rule OHdesorption2
1of rule OHscission2					C(CO)(CO)O.[{M}].[{M}]>>C(O_[{M}])(CO)CO_[{M}]	-36.8737	0
1of rule OHscission4					C(O_[{M}])(CO)CO_[{M}].[{M}].[{M}]>>C(C(O_[{M}])CO_[{M}])([{M}])O.[{M}H]	-79.7489	20.8931
1of rule CHformation					C(C(O_[{M}])CO_[{M}])([{M}])O.[{M}].[{M}]>>C(C(O_[{M}])CO_[{M}])(O[{M}])[{M}].[{M}H]	38.8376	87.4123
1of rule OHformation2					C(C(O_[{M}])CO_[{M}])(O[{M}])[{M}].[{M}].[{M}]>>C(C(O[{M}])CO_[{M}])(O[{M}])[{M}].[{M}].[{M}H]	46.4003	93.9163
1of rule COScission					C(C(O[{M}])CO_[{M}])(O[{M}])[{M}].[{M}].[{M}]>>C(=O)(C(CO_[{M}])O[{M}])[{M}].[{M}].[{M}].[{M}H]	-64.8444	36.0957
					C(=O)(C(CO_[{M}])O[{M}])[{M}]>>C(=O)(C(=O)CO_[{M}])[{M}].[{M}H]	-23.2129	78.5599
1 pathways from C(CO)(CO)O containing					C(=O)(C(=O)CO_[{M}])[{M}].[{M}].[{M}]>>C(=O)([{M}])[{M}].C(=O)(CO_[{M}])[{M}]	-119.788	74.2951
1of rule OHadsorption2					C(=O)([{M}])[{M}]>>O=[C:].[{M}].[{M}]	102.221	0
1of rule OHdesorption2
1of rule CHformation					the above pathway is of length 8 and contains
1of rule COScission					rule OHadsorption2 occurs 1 times
					rule CHscission occurs 1 times
1 pathways from C(CO)(CO)O containing					rule CHscission4 occurs 1 times
1of rule OHadsorption2					rule CCscission occurs 1 times
1of rule OHdesorption2					rule OHscission occurs 1 times
1of rule OHscission					rule OHscission2 occurs 1 times
1of rule CHformation					rule CdoubleOFormation occurs 1 times
1of rule COScission					rule CarbonMonoxideFormation occurs 1 times
					Max Ea is			93.9163
2 pathways from C(CO)(CO)O containing
1of rule OHadsorption2					C(CO)(CO)O.[{M}].[{M}]>>C(O_[{M}])(CO)CO_[{M}]	-36.8737	0
1of rule OHdesorption2					C(O_[{M}])(CO)CO_[{M}].[{M}].[{M}]>>C(O_[{M}])(CO[{M}])CO_[{M}].[{M}H]	17.4241	68.9967
1of rule CHscission					C(O_[{M}])(CO[{M}])CO_[{M}].[{M}].[{M}]>>C(C(O_[{M}])CO_[{M}])(O[{M}])[{M}].[{M}H]	-58.3355	42.7348
1of rule CHformation					C(C(O_[{M}])CO_[{M}])(O[{M}])[{M}].[{M}].[{M}]>>C(C(O[{M}])CO_[{M}])(O[{M}])[{M}].[{M}].[{M}H]	46.4003	93.9163
1of rule CHformation2					C(C(O[{M}])CO_[{M}])(O[{M}])[{M}].[{M}].[{M}]>>C(=O)(C(CO_[{M}])O[{M}])[{M}].[{M}].[{M}].[{M}H]	-64.8444	36.0957
1of rule COScission2					C(=O)(C(CO_[{M}])O[{M}])[{M}]>>C(=O)(C(=O)CO_[{M}])[{M}].[{M}H]	-23.2129	78.5599
					C(=O)(C(=O)CO_[{M}])[{M}].[{M}].[{M}]>>C(=O)([{M}])[{M}].C(=O)(CO_[{M}])[{M}]	-119.788	74.2951
3 pathways from C(CO)(CO)O containing					C(=O)([{M}])[{M}]>>O=[C:].[{M}].[{M}]	102.221	0
1of rule OHadsorption2
1of rule OHdesorption2					the above pathway is of length 8 and contains
1of rule CHscission					rule OHadsorption2 occurs 1 times
1of rule OHscission2					rule CHscission occurs 1 times
1of rule CHformation					rule CHscission4 occurs 1 times
1of rule CHformation2					rule CCscission occurs 1 times
1of rule COScission					rule OHscission occurs 1 times
					rule OHscission2 occurs 1 times
2 pathways from C(CO)(CO)O containing					rule CdoubleOFormation occurs 1 times
1of rule OHadsorption2					rule CarbonMonoxideFormation occurs 1 times
1of rule OHdesorption2					Max Ea is			93.9163
1of rule CHscission2
1of rule CHformation					C(CO)(CO)O.[{M}].[{M}]>>C(O_[{M}])(CO)CO_[{M}]	-36.8737	0
1of rule CHformation2					C(O_[{M}])(CO)CO_[{M}].[{M}].[{M}]>>C(C(O_[{M}])CO_[{M}])([{M}])O.[{M}H]	-79.7489	20.8931
1of rule COScission					C(C(O_[{M}])CO_[{M}])([{M}])O.[{M}].[{M}]>>C(C([{M}])O)(CO_[{M}])O[{M}].[{M}].[{M}H]	46.4003	93.9163
					C(C([{M}])O)(CO_[{M}])O[{M}].[{M}].[{M}]>>C(C(O[{M}])CO_[{M}])(O[{M}])[{M}].[{M}H]	38.8376	87.4123
1 pathways from C(CO)(CO)O containing					C(C(O[{M}])CO_[{M}])(O[{M}])[{M}].[{M}].[{M}]>>C(=O)(C(CO_[{M}])O[{M}])[{M}].[{M}].[{M}].[{M}H]	-64.8444	36.0957
1of rule OHadsorption2					C(=O)(C(CO_[{M}])O[{M}])[{M}]>>C(=O)(C(=O)CO_[{M}])[{M}].[{M}H]	-23.2129	78.5599
1of rule OHdesorption2					C(=O)(C(=O)CO_[{M}])[{M}].[{M}].[{M}]>>C(=O)([{M}])[{M}].C(=O)(CO_[{M}])[{M}]	-119.788	74.2951
1of rule CHscission					C(=O)([{M}])[{M}]>>O=[C:].[{M}].[{M}]	102.221	0
1of rule OHscission
2of rule CHformation					the above pathway is of length 8 and contains
1of rule COScission					rule OHadsorption2 occurs 1 times
					rule CHscission occurs 1 times
6 pathways from C(CO)(CO)O containing					rule CHscission4 occurs 1 times
1of rule OHadsorption2					rule CCscission occurs 1 times
1of rule OHdesorption2					rule OHscission occurs 1 times
1of rule OHscission					rule OHscission2 occurs 1 times
1of rule OHscission2					rule CdoubleOFormation occurs 1 times
1of rule CHformation					rule CarbonMonoxideFormation occurs 1 times
1of rule OHformation2					Max Ea is			93.9163
1of rule COScission
					C(CO)(CO)O.[{M}].[{M}]>>C(O_[{M}])(CO)CO_[{M}]	-36.8737	0
3 pathways from C(CO)(CO)O containing					C(O_[{M}])(CO)CO_[{M}].[{M}].[{M}]>>C(O[{M}])(CO_[{M}])CO_[{M}].[{M}H]	23.3108	74.0593
1of rule OHadsorption2					C(O[{M}])(CO_[{M}])CO_[{M}].[{M}].[{M}]>>C(C([{M}])O)(CO_[{M}])O[{M}].[{M}].[{M}H]	-56.6594	44.4444
1of rule OHdesorption2					C(C([{M}])O)(CO_[{M}])O[{M}].[{M}].[{M}]>>C(C(O[{M}])CO_[{M}])(O[{M}])[{M}].[{M}H]	38.8376	87.4123
1of rule CHscission7					C(C(O[{M}])CO_[{M}])(O[{M}])[{M}].[{M}].[{M}]>>C(=O)(C(CO_[{M}])O[{M}])[{M}].[{M}].[{M}].[{M}H]	-64.8444	36.0957
1of rule OHscission2					C(=O)(C(CO_[{M}])O[{M}])[{M}]>>C(=O)(C(=O)CO_[{M}])[{M}].[{M}H]	-23.2129	78.5599
1of rule CHformation					C(=O)(C(=O)CO_[{M}])[{M}].[{M}].[{M}]>>C(=O)([{M}])[{M}].C(=O)(CO_[{M}])[{M}]	-119.788	74.2951
1of rule CHformation2					C(=O)([{M}])[{M}]>>O=[C:].[{M}].[{M}]	102.221	0
1of rule COScission
					the above pathway is of length 8 and contains
2 pathways from C(CO)(CO)O containing					rule OHadsorption2 occurs 1 times
1of rule OHadsorption2					rule CHscission2 occurs 1 times
1of rule OHdesorption2					rule CHscission4 occurs 1 times
1of rule OHscission					rule CCscission occurs 1 times
1of rule CHformation					rule OHscission occurs 1 times
1of rule OHformation2					rule OHscission4 occurs 1 times
1of rule COScission2					rule CdoubleOFormation occurs 1 times
					rule CarbonMonoxideFormation occurs 1 times
					Max Ea is			87.4123
Number of pathways of length 4 is: 1
Number of pathways of length 5 is: 1					C(CO)(CO)O.[{M}].[{M}]>>C(O_[{M}])(CO)CO_[{M}]	-36.8737	0
Number of pathways of length 6 is: 12					C(O_[{M}])(CO)CO_[{M}].[{M}].[{M}]>>C(O_[{M}])(CO[{M}])CO_[{M}].[{M}H]	17.4241	68.9967
Number of pathways of length 7 is: 22					C(O_[{M}])(CO[{M}])CO_[{M}].[{M}].[{M}]>>C(O[{M}])(CO[{M}])CO_[{M}].[{M}].[{M}H]	46.4003	93.9163
1 molecules satisfied the molecular constraints specified					C(O[{M}])(CO[{M}])CO_[{M}].[{M}].[{M}]>>C(C(O[{M}])CO_[{M}])(O[{M}])[{M}].[{M}H]	-58.3355	42.7348
					C(C(O[{M}])CO_[{M}])(O[{M}])[{M}].[{M}].[{M}]>>C(=O)(C(CO_[{M}])O[{M}])[{M}].[{M}].[{M}].[{M}H]	-64.8444	36.0957
					C(=O)(C(CO_[{M}])O[{M}])[{M}]>>C(=O)(C(=O)CO_[{M}])[{M}].[{M}H]	-23.2129	78.5599
					C(=O)(C(=O)CO_[{M}])[{M}].[{M}].[{M}]>>C(=O)([{M}])[{M}].C(=O)(CO_[{M}])[{M}]	-119.788	74.2951
					C(=O)([{M}])[{M}]>>O=[C:].[{M}].[{M}]	102.221	0
					the above pathway is of length 8 and contains
					rule OHadsorption2 occurs 1 times
					rule CHscission occurs 1 times
					rule CHscission4 occurs 1 times
					rule CCscission occurs 1 times
					rule OHscission occurs 1 times
					rule OHscission2 occurs 1 times
					rule CdoubleOFormation occurs 1 times
					rule CarbonMonoxideFormation occurs 1 times
					Max Ea is			93.9163
					C(CO)(CO)O.[{M}].[{M}]>>C(O_[{M}])(CO)CO_[{M}]	-36.8737	0
					C(O_[{M}])(CO)CO_[{M}].[{M}].[{M}]>>C(O[{M}])(CO_[{M}])CO_[{M}].[{M}H]	23.3108	74.0593
					C(O[{M}])(CO_[{M}])CO_[{M}].[{M}].[{M}]>>C(O[{M}])(CO[{M}])CO_[{M}].[{M}].[{M}H]	40.5136	88.8537
					C(O[{M}])(CO[{M}])CO_[{M}].[{M}].[{M}]>>C(C(O[{M}])CO_[{M}])(O[{M}])[{M}].[{M}H]	-58.3355	42.7348
					C(C(O[{M}])CO_[{M}])(O[{M}])[{M}].[{M}].[{M}]>>C(=O)(C(CO_[{M}])O[{M}])[{M}].[{M}].[{M}].[{M}H]	-64.8444	36.0957
					C(=O)(C(CO_[{M}])O[{M}])[{M}]>>C(=O)(C(=O)CO_[{M}])[{M}].[{M}H]	-23.2129	78.5599
					C(=O)(C(=O)CO_[{M}])[{M}].[{M}].[{M}]>>C(=O)([{M}])[{M}].C(=O)(CO_[{M}])[{M}]	-119.788	74.2951
					C(=O)([{M}])[{M}]>>O=[C:].[{M}].[{M}]	102.221	0
					the above pathway is of length 8 and contains
					rule OHadsorption2 occurs 1 times
					rule CHscission occurs 1 times
					rule CHscission4 occurs 1 times
					rule CCscission occurs 1 times
					rule OHscission2 occurs 1 times
					rule OHscission4 occurs 1 times
					rule CdoubleOFormation occurs 1 times
					rule CarbonMonoxideFormation occurs 1 times
					Max Ea is			88.8537
					C(CO)(CO)O.[{M}].[{M}]>>C(O_[{M}])(CO)CO_[{M}]	-36.8737	0
					C(O_[{M}])(CO)CO_[{M}].[{M}].[{M}]>>C(C(O_[{M}])CO_[{M}])([{M}])O.[{M}H]	-79.7489	20.8931
					C(C(O_[{M}])CO_[{M}])([{M}])O.[{M}].[{M}]>>C(C(O_[{M}])CO_[{M}])(O[{M}])[{M}].[{M}H]	38.8376	87.4123
					C(C(O_[{M}])CO_[{M}])(O[{M}])[{M}].[{M}].[{M}]>>C(C(O[{M}])CO_[{M}])(O[{M}])[{M}].[{M}].[{M}H]	46.4003	93.9163
					C(C(O[{M}])CO_[{M}])(O[{M}])[{M}]>>C(=O)(C(CO_[{M}])O[{M}])[{M}].[{M}H]	-64.8444	36.0957
					C(=O)(C(CO_[{M}])O[{M}])[{M}]>>C(=O)(C(=O)CO_[{M}])[{M}].[{M}H]	-23.2129	78.5599
					C(=O)(C(=O)CO_[{M}])[{M}].[{M}].[{M}]>>C(=O)([{M}])[{M}].C(=O)(CO_[{M}])[{M}]	-119.788	74.2951
					C(=O)([{M}])[{M}]>>O=[C:].[{M}].[{M}]	102.221	0
					the above pathway is of length 8 and contains
					rule OHadsorption2 occurs 1 times
					rule CHscission occurs 1 times
					rule CCscission occurs 1 times
					rule OHscission occurs 1 times
					rule OHscission2 occurs 1 times
					rule CdoubleOFormation occurs 2 times
					rule CarbonMonoxideFormation occurs 1 times
					Max Ea is			93.9163
					C(CO)(CO)O.[{M}].[{M}]>>C(O_[{M}])(CO)CO_[{M}]	-36.8737	0
					C(O_[{M}])(CO)CO_[{M}].[{M}].[{M}]>>C(O_[{M}])(CO[{M}])CO_[{M}].[{M}H]	17.4241	68.9967
					C(O_[{M}])(CO[{M}])CO_[{M}].[{M}].[{M}]>>C(C(O_[{M}])CO_[{M}])(O[{M}])[{M}].[{M}H]	-58.3355	42.7348
					C(C(O_[{M}])CO_[{M}])(O[{M}])[{M}].[{M}].[{M}]>>C(C(O[{M}])CO_[{M}])(O[{M}])[{M}].[{M}].[{M}H]	46.4003	93.9163
					C(C(O[{M}])CO_[{M}])(O[{M}])[{M}]>>C(=O)(C(CO_[{M}])O[{M}])[{M}].[{M}H]	-64.8444	36.0957
					C(=O)(C(CO_[{M}])O[{M}])[{M}]>>C(=O)(C(=O)CO_[{M}])[{M}].[{M}H]	-23.2129	78.5599
					C(=O)(C(=O)CO_[{M}])[{M}].[{M}].[{M}]>>C(=O)([{M}])[{M}].C(=O)(CO_[{M}])[{M}]	-119.788	74.2951
					C(=O)([{M}])[{M}]>>O=[C:].[{M}].[{M}]	102.221	0
					the above pathway is of length 8 and contains
					rule OHadsorption2 occurs 1 times
					rule CHscission occurs 1 times
					rule CCscission occurs 1 times
					rule OHscission occurs 1 times
					rule OHscission2 occurs 1 times
					rule CdoubleOFormation occurs 2 times
					rule CarbonMonoxideFormation occurs 1 times
					Max Ea is			93.9163
					C(CO)(CO)O.[{M}].[{M}]>>C(O_[{M}])(CO)CO_[{M}]	-36.8737	0
					C(O_[{M}])(CO)CO_[{M}].[{M}].[{M}]>>C(C(O_[{M}])CO_[{M}])([{M}])O.[{M}H]	-79.7489	20.8931
					C(C(O_[{M}])CO_[{M}])([{M}])O.[{M}].[{M}]>>C(C([{M}])O)(CO_[{M}])O[{M}].[{M}].[{M}H]	46.4003	93.9163
					C(C([{M}])O)(CO_[{M}])O[{M}].[{M}].[{M}]>>C(C(O[{M}])CO_[{M}])(O[{M}])[{M}].[{M}H]	38.8376	87.4123
					C(C(O[{M}])CO_[{M}])(O[{M}])[{M}]>>C(=O)(C(CO_[{M}])O[{M}])[{M}].[{M}H]	-64.8444	36.0957
					C(=O)(C(CO_[{M}])O[{M}])[{M}]>>C(=O)(C(=O)CO_[{M}])[{M}].[{M}H]	-23.2129	78.5599
					C(=O)(C(=O)CO_[{M}])[{M}].[{M}].[{M}]>>C(=O)([{M}])[{M}].C(=O)(CO_[{M}])[{M}]	-119.788	74.2951
					C(=O)([{M}])[{M}]>>O=[C:].[{M}].[{M}]	102.221	0
					the above pathway is of length 8 and contains
					rule OHadsorption2 occurs 1 times
					rule CHscission occurs 1 times
					rule CCscission occurs 1 times
					rule OHscission occurs 1 times
					rule OHscission2 occurs 1 times
					rule CdoubleOFormation occurs 2 times
					rule CarbonMonoxideFormation occurs 1 times
					Max Ea is			93.9163
					C(CO)(CO)O.[{M}].[{M}]>>C(O_[{M}])(CO)CO_[{M}]	-36.8737	0
					C(O_[{M}])(CO)CO_[{M}].[{M}].[{M}]>>C(O[{M}])(CO_[{M}])CO_[{M}].[{M}H]	23.3108	74.0593
					C(O[{M}])(CO_[{M}])CO_[{M}].[{M}].[{M}]>>C(C([{M}])O)(CO_[{M}])O[{M}].[{M}].[{M}H]	-56.6594	44.4444
					C(C([{M}])O)(CO_[{M}])O[{M}].[{M}].[{M}]>>C(C(O[{M}])CO_[{M}])(O[{M}])[{M}].[{M}H]	38.8376	87.4123
					C(C(O[{M}])CO_[{M}])(O[{M}])[{M}]>>C(=O)(C(CO_[{M}])O[{M}])[{M}].[{M}H]	-64.8444	36.0957
					C(=O)(C(CO_[{M}])O[{M}])[{M}]>>C(=O)(C(=O)CO_[{M}])[{M}].[{M}H]	-23.2129	78.5599
					C(=O)(C(=O)CO_[{M}])[{M}].[{M}].[{M}]>>C(=O)([{M}])[{M}].C(=O)(CO_[{M}])[{M}]	-119.788	74.2951
					C(=O)([{M}])[{M}]>>O=[C:].[{M}].[{M}]	102.221	0
					the above pathway is of length 8 and contains
					rule OHadsorption2 occurs 1 times
					rule CHscission2 occurs 1 times
					rule CCscission occurs 1 times
					rule OHscission occurs 1 times
					rule OHscission4 occurs 1 times
					rule CdoubleOFormation occurs 2 times
					rule CarbonMonoxideFormation occurs 1 times
					Max Ea is			87.4123
					C(CO)(CO)O.[{M}].[{M}]>>C(O_[{M}])(CO)CO_[{M}]	-36.8737	0
					C(O_[{M}])(CO)CO_[{M}].[{M}].[{M}]>>C(O_[{M}])(CO[{M}])CO_[{M}].[{M}H]	17.4241	68.9967
					C(O_[{M}])(CO[{M}])CO_[{M}].[{M}].[{M}]>>C(O[{M}])(CO[{M}])CO_[{M}].[{M}].[{M}H]	46.4003	93.9163
					C(O[{M}])(CO[{M}])CO_[{M}].[{M}].[{M}]>>C(C(O[{M}])CO_[{M}])(O[{M}])[{M}].[{M}H]	-58.3355	42.7348
					C(C(O[{M}])CO_[{M}])(O[{M}])[{M}]>>C(=O)(C(CO_[{M}])O[{M}])[{M}].[{M}H]	-64.8444	36.0957
					C(=O)(C(CO_[{M}])O[{M}])[{M}]>>C(=O)(C(=O)CO_[{M}])[{M}].[{M}H]	-23.2129	78.5599
					C(=O)(C(=O)CO_[{M}])[{M}].[{M}].[{M}]>>C(=O)([{M}])[{M}].C(=O)(CO_[{M}])[{M}]	-119.788	74.2951
					C(=O)([{M}])[{M}]>>O=[C:].[{M}].[{M}]	102.221	0
					the above pathway is of length 8 and contains
					rule OHadsorption2 occurs 1 times
					rule CHscission occurs 1 times
					rule CCscission occurs 1 times
					rule OHscission occurs 1 times
					rule OHscission2 occurs 1 times
					rule CdoubleOFormation occurs 2 times
					rule CarbonMonoxideFormation occurs 1 times
					Max Ea is			93.9163
					C(CO)(CO)O.[{M}].[{M}]>>C(O_[{M}])(CO)CO_[{M}]	-36.8737	0
					C(O_[{M}])(CO)CO_[{M}].[{M}].[{M}]>>C(O[{M}])(CO_[{M}])CO_[{M}].[{M}H]	23.3108	74.0593
					C(O[{M}])(CO_[{M}])CO_[{M}].[{M}].[{M}]>>C(O[{M}])(CO[{M}])CO_[{M}].[{M}].[{M}H]	40.5136	88.8537
					C(O[{M}])(CO[{M}])CO_[{M}].[{M}].[{M}]>>C(C(O[{M}])CO_[{M}])(O[{M}])[{M}].[{M}H]	-58.3355	42.7348
					C(C(O[{M}])CO_[{M}])(O[{M}])[{M}]>>C(=O)(C(CO_[{M}])O[{M}])[{M}].[{M}H]	-64.8444	36.0957
					C(=O)(C(CO_[{M}])O[{M}])[{M}]>>C(=O)(C(=O)CO_[{M}])[{M}].[{M}H]	-23.2129	78.5599
					C(=O)(C(=O)CO_[{M}])[{M}].[{M}].[{M}]>>C(=O)([{M}])[{M}].C(=O)(CO_[{M}])[{M}]	-119.788	74.2951
					C(=O)([{M}])[{M}]>>O=[C:].[{M}].[{M}]	102.221	0
					the above pathway is of length 8 and contains
					rule OHadsorption2 occurs 1 times
					rule CHscission occurs 1 times
					rule CCscission occurs 1 times
					rule OHscission2 occurs 1 times
					rule OHscission4 occurs 1 times
					rule CdoubleOFormation occurs 2 times
					rule CarbonMonoxideFormation occurs 1 times
					Max Ea is			88.8537
					C(CO)(CO)O.[{M}].[{M}]>>C(O_[{M}])(CO)CO_[{M}]	-36.8737	0
					C(O_[{M}])(CO)CO_[{M}].[{M}].[{M}]>>C(C(O_[{M}])CO_[{M}])([{M}])O.[{M}H]	-79.7489	20.8931
					C(C(O_[{M}])CO_[{M}])([{M}])O.[{M}].[{M}]>>C(C([{M}])O)(CO_[{M}])([{M}])O.[{M}].[{M}H]	-7.20837	94.8845
					C(C([{M}])O)(CO_[{M}])([{M}])O>>C(C=O)(CO_[{M}])([{M}])O.[{M}H]	-7.50427	47.5583
					C(C=O)(CO_[{M}])([{M}])O.[{M}].[{M}]>>C(C=O)(CO_[{M}])(O[{M}])[{M}].[{M}H]	38.8376	87.4123
					C(C=O)(CO_[{M}])(O[{M}])[{M}].[{M}].[{M}]>>C(=O)(C(=O)CO_[{M}])[{M}].[{M}].[{M}].[{M}H]	-26.9444	74.7537
					C(=O)(C(=O)CO_[{M}])[{M}].[{M}].[{M}]>>C(=O)([{M}])[{M}].C(=O)(CO_[{M}])[{M}]	-119.788	74.2951
					C(=O)([{M}])[{M}]>>O=[C:].[{M}].[{M}]	102.221	0
					the above pathway is of length 8 and contains
					rule OHadsorption2 occurs 1 times
					rule CHscission occurs 1 times
					rule CHscission2 occurs 1 times
					rule CHscission3 occurs 1 times
					rule CCscission occurs 1 times
					rule OHscission occurs 1 times
					rule CdoubleOFromCOH occurs 1 times
					rule CarbonMonoxideFormation occurs 1 times
					Max Ea is			94.8845
					C(CO)(CO)O.[{M}].[{M}]>>C(O_[{M}])(CO)CO_[{M}]	-36.8737	0
					C(O_[{M}])(CO)CO_[{M}].[{M}].[{M}]>>C(CO_[{M}])(CO_[{M}])([{M}])O.[{M}H]	-51.7113	49.4915
					C(CO_[{M}])(CO_[{M}])([{M}])O.[{M}].[{M}]>>C(C([{M}])O)(CO_[{M}])([{M}])O.[{M}].[{M}H]	-35.246	66.2861
					C(C([{M}])O)(CO_[{M}])([{M}])O>>C(C=O)(CO_[{M}])([{M}])O.[{M}H]	-7.50427	47.5583
					C(C=O)(CO_[{M}])([{M}])O.[{M}].[{M}]>>C(C=O)(CO_[{M}])(O[{M}])[{M}].[{M}H]	38.8376	87.4123
					C(C=O)(CO_[{M}])(O[{M}])[{M}].[{M}].[{M}]>>C(=O)(C(=O)CO_[{M}])[{M}].[{M}].[{M}].[{M}H]	-26.9444	74.7537
					C(=O)(C(=O)CO_[{M}])[{M}].[{M}].[{M}]>>C(=O)([{M}])[{M}].C(=O)(CO_[{M}])[{M}]	-119.788	74.2951
					C(=O)([{M}])[{M}]>>O=[C:].[{M}].[{M}]	102.221	0
					the above pathway is of length 8 and contains
					rule OHadsorption2 occurs 1 times
					rule CHscission2 occurs 1 times
					rule CHscission3 occurs 1 times
					rule CHscission7 occurs 1 times
					rule CCscission occurs 1 times
					rule OHscission occurs 1 times
					rule CdoubleOFromCOH occurs 1 times
					rule CarbonMonoxideFormation occurs 1 times
					Max Ea is			87.4123
					C(CO)(CO)O.[{M}].[{M}]>>C(O_[{M}])(CO)CO_[{M}]	-36.8737	0
					C(O_[{M}])(CO)CO_[{M}].[{M}].[{M}]>>C(C(O_[{M}])CO_[{M}])([{M}])O.[{M}H]	-79.7489	20.8931
					C(C(O_[{M}])CO_[{M}])([{M}])O.[{M}].[{M}]>>C(C(O_[{M}])CO_[{M}])(O[{M}])[{M}].[{M}H]	38.8376	87.4123
					C(C(O_[{M}])CO_[{M}])(O[{M}])[{M}].[{M}].[{M}]>>C(C=O)(CO_[{M}])([{M}])O.[{M}].[{M}].[{M}].[{M}H]	-53.5502	47.6158
					C(C=O)(CO_[{M}])([{M}])O.[{M}].[{M}]>>C(C=O)(CO_[{M}])(O[{M}])[{M}].[{M}H]	38.8376	87.4123
					C(C=O)(CO_[{M}])(O[{M}])[{M}].[{M}].[{M}]>>C(=O)(C(=O)CO_[{M}])[{M}].[{M}].[{M}].[{M}H]	-26.9444	74.7537
					C(=O)(C(=O)CO_[{M}])[{M}].[{M}].[{M}]>>C(=O)([{M}])[{M}].C(=O)(CO_[{M}])[{M}]	-119.788	74.2951
					C(=O)([{M}])[{M}]>>O=[C:].[{M}].[{M}]	102.221	0
					the above pathway is of length 8 and contains
					rule OHadsorption2 occurs 1 times
					rule CHscission occurs 1 times
					rule CHscission3 occurs 1 times
					rule CHscission5 occurs 1 times
					rule CCscission occurs 1 times
					rule OHscission occurs 2 times
					rule CarbonMonoxideFormation occurs 1 times
					Max Ea is			87.4123
					C(CO)(CO)O.[{M}].[{M}]>>C(O_[{M}])(CO)CO_[{M}]	-36.8737	0
					C(O_[{M}])(CO)CO_[{M}].[{M}].[{M}]>>C(O_[{M}])(CO[{M}])CO_[{M}].[{M}H]	17.4241	68.9967
					C(O_[{M}])(CO[{M}])CO_[{M}].[{M}].[{M}]>>C(C(O_[{M}])CO_[{M}])(O[{M}])[{M}].[{M}H]	-58.3355	42.7348
					C(C(O_[{M}])CO_[{M}])(O[{M}])[{M}].[{M}].[{M}]>>C(C=O)(CO_[{M}])([{M}])O.[{M}].[{M}].[{M}].[{M}H]	-53.5502	47.6158
					C(C=O)(CO_[{M}])([{M}])O.[{M}].[{M}]>>C(C=O)(CO_[{M}])(O[{M}])[{M}].[{M}H]	38.8376	87.4123
					C(C=O)(CO_[{M}])(O[{M}])[{M}].[{M}].[{M}]>>C(=O)(C(=O)CO_[{M}])[{M}].[{M}].[{M}].[{M}H]	-26.9444	74.7537
					C(=O)(C(=O)CO_[{M}])[{M}].[{M}].[{M}]>>C(=O)([{M}])[{M}].C(=O)(CO_[{M}])[{M}]	-119.788	74.2951
					C(=O)([{M}])[{M}]>>O=[C:].[{M}].[{M}]	102.221	0
					the above pathway is of length 8 and contains
					rule OHadsorption2 occurs 1 times
					rule CHscission occurs 1 times
					rule CHscission3 occurs 1 times
					rule CHscission5 occurs 1 times
					rule CCscission occurs 1 times
					rule OHscission occurs 2 times
					rule CarbonMonoxideFormation occurs 1 times
					Max Ea is			87.4123
					C(CO)(CO)O.[{M}].[{M}]>>C(O_[{M}])(CO)CO_[{M}]	-36.8737	0
					C(O_[{M}])(CO)CO_[{M}].[{M}].[{M}]>>C(CO_[{M}])(CO_[{M}])([{M}])O.[{M}H]	-51.7113	49.4915
					C(CO_[{M}])(CO_[{M}])([{M}])O.[{M}].[{M}]>>C(CO[{M}])(CO_[{M}])([{M}])O.[{M}].[{M}H]	40.5136	88.8537
					C(CO[{M}])(CO_[{M}])([{M}])O>>C(C=O)(CO_[{M}])([{M}])O.[{M}H]	-83.2639	17.3079
					C(C=O)(CO_[{M}])([{M}])O.[{M}].[{M}]>>C(C=O)(CO_[{M}])(O[{M}])[{M}].[{M}H]	38.8376	87.4123
					C(C=O)(CO_[{M}])(O[{M}])[{M}].[{M}].[{M}]>>C(=O)(C(=O)CO_[{M}])[{M}].[{M}].[{M}].[{M}H]	-26.9444	74.7537
					C(=O)(C(=O)CO_[{M}])[{M}].[{M}].[{M}]>>C(=O)([{M}])[{M}].C(=O)(CO_[{M}])[{M}]	-119.788	74.2951
					C(=O)([{M}])[{M}]>>O=[C:].[{M}].[{M}]	102.221	0
					the above pathway is of length 8 and contains
					rule OHadsorption2 occurs 1 times
					rule CHscission3 occurs 1 times
					rule CHscission7 occurs 1 times
					rule CCscission occurs 1 times
					rule OHscission occurs 1 times
					rule OHscission2 occurs 1 times
					rule CdoubleOFormation occurs 1 times
					rule CarbonMonoxideFormation occurs 1 times
					Max Ea is			88.8537
					C(CO)(CO)O.[{M}].[{M}]>>C(O_[{M}])(CO)CO_[{M}]	-36.8737	0
					C(O_[{M}])(CO)CO_[{M}].[{M}].[{M}]>>C(O_[{M}])(CO[{M}])CO_[{M}].[{M}H]	17.4241	68.9967
					C(O_[{M}])(CO[{M}])CO_[{M}].[{M}].[{M}]>>C(CO[{M}])(CO_[{M}])([{M}])O.[{M}].[{M}H]	-28.6218	73.0428
					C(CO[{M}])(CO_[{M}])([{M}])O>>C(C=O)(CO_[{M}])([{M}])O.[{M}H]	-83.2639	17.3079
					C(C=O)(CO_[{M}])([{M}])O.[{M}].[{M}]>>C(C=O)(CO_[{M}])(O[{M}])[{M}].[{M}H]	38.8376	87.4123
					C(C=O)(CO_[{M}])(O[{M}])[{M}].[{M}].[{M}]>>C(=O)(C(=O)CO_[{M}])[{M}].[{M}].[{M}].[{M}H]	-26.9444	74.7537
					C(=O)(C(=O)CO_[{M}])[{M}].[{M}].[{M}]>>C(=O)([{M}])[{M}].C(=O)(CO_[{M}])[{M}]	-119.788	74.2951
					C(=O)([{M}])[{M}]>>O=[C:].[{M}].[{M}]	102.221	0
					the above pathway is of length 8 and contains
					rule OHadsorption2 occurs 1 times
					rule CHscission2 occurs 1 times
					rule CHscission3 occurs 1 times
					rule CCscission occurs 1 times
					rule OHscission occurs 2 times
					rule CdoubleOFormation occurs 1 times
					rule CarbonMonoxideFormation occurs 1 times
					Max Ea is			87.4123
					C(CO)(CO)O.[{M}].[{M}]>>C(O_[{M}])(CO)CO_[{M}]	-36.8737	0
					C(O_[{M}])(CO)CO_[{M}].[{M}].[{M}]>>C(C(O_[{M}])CO_[{M}])([{M}])O.[{M}H]	-79.7489	20.8931
					C(C(O_[{M}])CO_[{M}])([{M}])O.[{M}].[{M}]>>C(C(O_[{M}])CO_[{M}])(O[{M}])[{M}].[{M}H]	38.8376	87.4123
					C(C(O_[{M}])CO_[{M}])(O[{M}])[{M}].[{M}].[{M}]>>C(C(O[{M}])CO_[{M}])(O[{M}])[{M}].[{M}].[{M}H]	46.4003	93.9163
					C(C(O[{M}])CO_[{M}])(O[{M}])[{M}].[{M}].[{M}]>>C(C=O)(CO_[{M}])(O[{M}])[{M}].[{M}].[{M}].[{M}H]	-61.1129	39.9018
					C(C=O)(CO_[{M}])(O[{M}])[{M}].[{M}].[{M}]>>C(=O)(C(=O)CO_[{M}])[{M}].[{M}].[{M}].[{M}H]	-26.9444	74.7537
					C(=O)(C(=O)CO_[{M}])[{M}].[{M}].[{M}]>>C(=O)([{M}])[{M}].C(=O)(CO_[{M}])[{M}]	-119.788	74.2951
					C(=O)([{M}])[{M}]>>O=[C:].[{M}].[{M}]	102.221	0
					the above pathway is of length 8 and contains
					rule OHadsorption2 occurs 1 times
					rule CHscission occurs 1 times
					rule CHscission3 occurs 2 times
					rule CCscission occurs 1 times
					rule OHscission occurs 1 times
					rule OHscission2 occurs 1 times
					rule CarbonMonoxideFormation occurs 1 times
					Max Ea is			93.9163
					C(CO)(CO)O.[{M}].[{M}]>>C(O_[{M}])(CO)CO_[{M}]	-36.8737	0
					C(O_[{M}])(CO)CO_[{M}].[{M}].[{M}]>>C(O_[{M}])(CO[{M}])CO_[{M}].[{M}H]	17.4241	68.9967
					C(O_[{M}])(CO[{M}])CO_[{M}].[{M}].[{M}]>>C(C(O_[{M}])CO_[{M}])(O[{M}])[{M}].[{M}H]	-58.3355	42.7348
					C(C(O_[{M}])CO_[{M}])(O[{M}])[{M}].[{M}].[{M}]>>C(C(O[{M}])CO_[{M}])(O[{M}])[{M}].[{M}].[{M}H]	46.4003	93.9163
					C(C(O[{M}])CO_[{M}])(O[{M}])[{M}].[{M}].[{M}]>>C(C=O)(CO_[{M}])(O[{M}])[{M}].[{M}].[{M}].[{M}H]	-61.1129	39.9018
					C(C=O)(CO_[{M}])(O[{M}])[{M}].[{M}].[{M}]>>C(=O)(C(=O)CO_[{M}])[{M}].[{M}].[{M}].[{M}H]	-26.9444	74.7537
					C(=O)(C(=O)CO_[{M}])[{M}].[{M}].[{M}]>>C(=O)([{M}])[{M}].C(=O)(CO_[{M}])[{M}]	-119.788	74.2951
					C(=O)([{M}])[{M}]>>O=[C:].[{M}].[{M}]	102.221	0
					the above pathway is of length 8 and contains
					rule OHadsorption2 occurs 1 times
					rule CHscission occurs 1 times
					rule CHscission3 occurs 2 times
					rule CCscission occurs 1 times
					rule OHscission occurs 1 times
					rule OHscission2 occurs 1 times
					rule CarbonMonoxideFormation occurs 1 times
					Max Ea is			93.9163
					C(CO)(CO)O.[{M}].[{M}]>>C(O_[{M}])(CO)CO_[{M}]	-36.8737	0
					C(O_[{M}])(CO)CO_[{M}].[{M}].[{M}]>>C(C(O_[{M}])CO_[{M}])([{M}])O.[{M}H]	-79.7489	20.8931
					C(C(O_[{M}])CO_[{M}])([{M}])O.[{M}].[{M}]>>C(C([{M}])O)(CO_[{M}])O[{M}].[{M}].[{M}H]	46.4003	93.9163
					C(C([{M}])O)(CO_[{M}])O[{M}].[{M}].[{M}]>>C(C(O[{M}])CO_[{M}])(O[{M}])[{M}].[{M}H]	38.8376	87.4123
					C(C(O[{M}])CO_[{M}])(O[{M}])[{M}].[{M}].[{M}]>>C(C=O)(CO_[{M}])(O[{M}])[{M}].[{M}].[{M}].[{M}H]	-61.1129	39.9018
					C(C=O)(CO_[{M}])(O[{M}])[{M}].[{M}].[{M}]>>C(=O)(C(=O)CO_[{M}])[{M}].[{M}].[{M}].[{M}H]	-26.9444	74.7537
					C(=O)(C(=O)CO_[{M}])[{M}].[{M}].[{M}]>>C(=O)([{M}])[{M}].C(=O)(CO_[{M}])[{M}]	-119.788	74.2951
					C(=O)([{M}])[{M}]>>O=[C:].[{M}].[{M}]	102.221	0
					the above pathway is of length 8 and contains
					rule OHadsorption2 occurs 1 times
					rule CHscission occurs 1 times
					rule CHscission3 occurs 2 times
					rule CCscission occurs 1 times
					rule OHscission occurs 1 times
					rule OHscission2 occurs 1 times
					rule CarbonMonoxideFormation occurs 1 times
					Max Ea is			93.9163
					C(CO)(CO)O.[{M}].[{M}]>>C(O_[{M}])(CO)CO_[{M}]	-36.8737	0
					C(O_[{M}])(CO)CO_[{M}].[{M}].[{M}]>>C(O[{M}])(CO_[{M}])CO_[{M}].[{M}H]	23.3108	74.0593
					C(O[{M}])(CO_[{M}])CO_[{M}].[{M}].[{M}]>>C(C([{M}])O)(CO_[{M}])O[{M}].[{M}].[{M}H]	-56.6594	44.4444
					C(C([{M}])O)(CO_[{M}])O[{M}].[{M}].[{M}]>>C(C(O[{M}])CO_[{M}])(O[{M}])[{M}].[{M}H]	38.8376	87.4123
					C(C(O[{M}])CO_[{M}])(O[{M}])[{M}].[{M}].[{M}]>>C(C=O)(CO_[{M}])(O[{M}])[{M}].[{M}].[{M}].[{M}H]	-61.1129	39.9018
					C(C=O)(CO_[{M}])(O[{M}])[{M}].[{M}].[{M}]>>C(=O)(C(=O)CO_[{M}])[{M}].[{M}].[{M}].[{M}H]	-26.9444	74.7537
					C(=O)(C(=O)CO_[{M}])[{M}].[{M}].[{M}]>>C(=O)([{M}])[{M}].C(=O)(CO_[{M}])[{M}]	-119.788	74.2951
					C(=O)([{M}])[{M}]>>O=[C:].[{M}].[{M}]	102.221	0
					the above pathway is of length 8 and contains
					rule OHadsorption2 occurs 1 times
					rule CHscission2 occurs 1 times
					rule CHscission3 occurs 2 times
					rule CCscission occurs 1 times
					rule OHscission occurs 1 times
					rule OHscission4 occurs 1 times
					rule CarbonMonoxideFormation occurs 1 times
					Max Ea is			87.4123
					C(CO)(CO)O.[{M}].[{M}]>>C(O_[{M}])(CO)CO_[{M}]	-36.8737	0
					C(O_[{M}])(CO)CO_[{M}].[{M}].[{M}]>>C(O_[{M}])(CO[{M}])CO_[{M}].[{M}H]	17.4241	68.9967
					C(O_[{M}])(CO[{M}])CO_[{M}].[{M}].[{M}]>>C(O[{M}])(CO[{M}])CO_[{M}].[{M}].[{M}H]	46.4003	93.9163
					C(O[{M}])(CO[{M}])CO_[{M}].[{M}].[{M}]>>C(C(O[{M}])CO_[{M}])(O[{M}])[{M}].[{M}H]	-58.3355	42.7348
					C(C(O[{M}])CO_[{M}])(O[{M}])[{M}].[{M}].[{M}]>>C(C=O)(CO_[{M}])(O[{M}])[{M}].[{M}].[{M}].[{M}H]	-61.1129	39.9018
					C(C=O)(CO_[{M}])(O[{M}])[{M}].[{M}].[{M}]>>C(=O)(C(=O)CO_[{M}])[{M}].[{M}].[{M}].[{M}H]	-26.9444	74.7537
					C(=O)(C(=O)CO_[{M}])[{M}].[{M}].[{M}]>>C(=O)([{M}])[{M}].C(=O)(CO_[{M}])[{M}]	-119.788	74.2951
					C(=O)([{M}])[{M}]>>O=[C:].[{M}].[{M}]	102.221	0
					the above pathway is of length 8 and contains
					rule OHadsorption2 occurs 1 times
					rule CHscission occurs 1 times
					rule CHscission3 occurs 2 times
					rule CCscission occurs 1 times
					rule OHscission occurs 1 times
					rule OHscission2 occurs 1 times
					rule CarbonMonoxideFormation occurs 1 times
					Max Ea is			93.9163
					C(CO)(CO)O.[{M}].[{M}]>>C(O_[{M}])(CO)CO_[{M}]	-36.8737	0
					C(O_[{M}])(CO)CO_[{M}].[{M}].[{M}]>>C(O[{M}])(CO_[{M}])CO_[{M}].[{M}H]	23.3108	74.0593
					C(O[{M}])(CO_[{M}])CO_[{M}].[{M}].[{M}]>>C(O[{M}])(CO[{M}])CO_[{M}].[{M}].[{M}H]	40.5136	88.8537
					C(O[{M}])(CO[{M}])CO_[{M}].[{M}].[{M}]>>C(C(O[{M}])CO_[{M}])(O[{M}])[{M}].[{M}H]	-58.3355	42.7348
					C(C(O[{M}])CO_[{M}])(O[{M}])[{M}].[{M}].[{M}]>>C(C=O)(CO_[{M}])(O[{M}])[{M}].[{M}].[{M}].[{M}H]	-61.1129	39.9018
					C(C=O)(CO_[{M}])(O[{M}])[{M}].[{M}].[{M}]>>C(=O)(C(=O)CO_[{M}])[{M}].[{M}].[{M}].[{M}H]	-26.9444	74.7537
					C(=O)(C(=O)CO_[{M}])[{M}].[{M}].[{M}]>>C(=O)([{M}])[{M}].C(=O)(CO_[{M}])[{M}]	-119.788	74.2951
					C(=O)([{M}])[{M}]>>O=[C:].[{M}].[{M}]	102.221	0
					the above pathway is of length 8 and contains
					rule OHadsorption2 occurs 1 times
					rule CHscission occurs 1 times
					rule CHscission3 occurs 2 times
					rule CCscission occurs 1 times
					rule OHscission2 occurs 1 times
					rule OHscission4 occurs 1 times
					rule CarbonMonoxideFormation occurs 1 times
					Max Ea is			88.8537
					C(CO)(CO)O.[{M}].[{M}]>>C(O_[{M}])(CO)CO_[{M}]	-36.8737	0
					C(O_[{M}])(CO)CO_[{M}].[{M}].[{M}]>>C(CO_[{M}])(CO_[{M}])([{M}])O.[{M}H]	-51.7113	49.4915
					C(CO_[{M}])(CO_[{M}])([{M}])O.[{M}].[{M}]>>C(O[{M}])(CO_[{M}])(CO_[{M}])[{M}].[{M}H]	38.8376	87.4123
					C(O[{M}])(CO_[{M}])(CO_[{M}])[{M}].[{M}].[{M}]>>C(O[{M}])(CO[{M}])(CO_[{M}])[{M}].[{M}].[{M}H]	40.5136	88.8537
					C(O[{M}])(CO[{M}])(CO_[{M}])[{M}]>>C(C=O)(CO_[{M}])(O[{M}])[{M}].[{M}H]	-83.2639	17.3079
					C(C=O)(CO_[{M}])(O[{M}])[{M}].[{M}].[{M}]>>C(=O)(C(=O)CO_[{M}])[{M}].[{M}].[{M}].[{M}H]	-26.9444	74.7537
					C(=O)(C(=O)CO_[{M}])[{M}].[{M}].[{M}]>>C(=O)([{M}])[{M}].C(=O)(CO_[{M}])[{M}]	-119.788	74.2951
					C(=O)([{M}])[{M}]>>O=[C:].[{M}].[{M}]	102.221	0
					the above pathway is of length 8 and contains
					rule OHadsorption2 occurs 1 times
					rule CHscission3 occurs 1 times
					rule CHscission7 occurs 1 times
					rule CCscission occurs 1 times
					rule OHscission occurs 1 times
					rule OHscission2 occurs 1 times
					rule CdoubleOFormation occurs 1 times
					rule CarbonMonoxideFormation occurs 1 times
					Max Ea is			88.8537
					C(CO)(CO)O.[{M}].[{M}]>>C(O_[{M}])(CO)CO_[{M}]	-36.8737	0
					C(O_[{M}])(CO)CO_[{M}].[{M}].[{M}]>>C(O[{M}])(CO_[{M}])CO_[{M}].[{M}H]	23.3108	74.0593
					C(O[{M}])(CO_[{M}])CO_[{M}].[{M}].[{M}]>>C(O[{M}])(CO_[{M}])(CO_[{M}])[{M}].[{M}H]	-36.1845	65.3288
					C(O[{M}])(CO_[{M}])(CO_[{M}])[{M}].[{M}].[{M}]>>C(O[{M}])(CO[{M}])(CO_[{M}])[{M}].[{M}].[{M}H]	40.5136	88.8537
					C(O[{M}])(CO[{M}])(CO_[{M}])[{M}]>>C(C=O)(CO_[{M}])(O[{M}])[{M}].[{M}H]	-83.2639	17.3079
					C(C=O)(CO_[{M}])(O[{M}])[{M}].[{M}].[{M}]>>C(=O)(C(=O)CO_[{M}])[{M}].[{M}].[{M}].[{M}H]	-26.9444	74.7537
					C(=O)(C(=O)CO_[{M}])[{M}].[{M}].[{M}]>>C(=O)([{M}])[{M}].C(=O)(CO_[{M}])[{M}]	-119.788	74.2951
					C(=O)([{M}])[{M}]>>O=[C:].[{M}].[{M}]	102.221	0
					the above pathway is of length 8 and contains
					rule OHadsorption2 occurs 1 times
					rule CHscission occurs 1 times
					rule CHscission3 occurs 1 times
					rule CCscission occurs 1 times
					rule OHscission2 occurs 1 times
					rule OHscission4 occurs 1 times
					rule CdoubleOFormation occurs 1 times
					rule CarbonMonoxideFormation occurs 1 times
					Max Ea is			88.8537
					C(CO)(CO)O.[{M}].[{M}]>>C(O_[{M}])(CO)CO_[{M}]	-36.8737	0
					C(O_[{M}])(CO)CO_[{M}].[{M}].[{M}]>>C(CO_[{M}])(CO_[{M}])([{M}])O.[{M}H]	-51.7113	49.4915
					C(CO_[{M}])(CO_[{M}])([{M}])O.[{M}].[{M}]>>C(CO[{M}])(CO_[{M}])([{M}])O.[{M}].[{M}H]	40.5136	88.8537
					C(CO[{M}])(CO_[{M}])([{M}])O.[{M}].[{M}]>>C(O[{M}])(CO[{M}])(CO_[{M}])[{M}].[{M}H]	38.8376	87.4123
					C(O[{M}])(CO[{M}])(CO_[{M}])[{M}]>>C(C=O)(CO_[{M}])(O[{M}])[{M}].[{M}H]	-83.2639	17.3079
					C(C=O)(CO_[{M}])(O[{M}])[{M}].[{M}].[{M}]>>C(=O)(C(=O)CO_[{M}])[{M}].[{M}].[{M}].[{M}H]	-26.9444	74.7537
					C(=O)(C(=O)CO_[{M}])[{M}].[{M}].[{M}]>>C(=O)([{M}])[{M}].C(=O)(CO_[{M}])[{M}]	-119.788	74.2951
					C(=O)([{M}])[{M}]>>O=[C:].[{M}].[{M}]	102.221	0
					the above pathway is of length 8 and contains
					rule OHadsorption2 occurs 1 times
					rule CHscission3 occurs 1 times
					rule CHscission7 occurs 1 times
					rule CCscission occurs 1 times
					rule OHscission occurs 1 times
					rule OHscission2 occurs 1 times
					rule CdoubleOFormation occurs 1 times
					rule CarbonMonoxideFormation occurs 1 times
					Max Ea is			88.8537
					C(CO)(CO)O.[{M}].[{M}]>>C(O_[{M}])(CO)CO_[{M}]	-36.8737	0
					C(O_[{M}])(CO)CO_[{M}].[{M}].[{M}]>>C(O_[{M}])(CO[{M}])CO_[{M}].[{M}H]	17.4241	68.9967
					C(O_[{M}])(CO[{M}])CO_[{M}].[{M}].[{M}]>>C(CO[{M}])(CO_[{M}])([{M}])O.[{M}].[{M}H]	-28.6218	73.0428
					C(CO[{M}])(CO_[{M}])([{M}])O.[{M}].[{M}]>>C(O[{M}])(CO[{M}])(CO_[{M}])[{M}].[{M}H]	38.8376	87.4123
					C(O[{M}])(CO[{M}])(CO_[{M}])[{M}]>>C(C=O)(CO_[{M}])(O[{M}])[{M}].[{M}H]	-83.2639	17.3079
					C(C=O)(CO_[{M}])(O[{M}])[{M}].[{M}].[{M}]>>C(=O)(C(=O)CO_[{M}])[{M}].[{M}].[{M}].[{M}H]	-26.9444	74.7537
					C(=O)(C(=O)CO_[{M}])[{M}].[{M}].[{M}]>>C(=O)([{M}])[{M}].C(=O)(CO_[{M}])[{M}]	-119.788	74.2951
					C(=O)([{M}])[{M}]>>O=[C:].[{M}].[{M}]	102.221	0
					the above pathway is of length 8 and contains
					rule OHadsorption2 occurs 1 times
					rule CHscission2 occurs 1 times
					rule CHscission3 occurs 1 times
					rule CCscission occurs 1 times
					rule OHscission occurs 2 times
					rule CdoubleOFormation occurs 1 times
					rule CarbonMonoxideFormation occurs 1 times
					Max Ea is			87.4123
					C(CO)(CO)O.[{M}].[{M}]>>C(O_[{M}])(CO)CO_[{M}]	-36.8737	0
					C(O_[{M}])(CO)CO_[{M}].[{M}].[{M}]>>C(O_[{M}])(CO[{M}])CO_[{M}].[{M}H]	17.4241	68.9967
					C(O_[{M}])(CO[{M}])CO_[{M}].[{M}].[{M}]>>C(O[{M}])(CO[{M}])CO_[{M}].[{M}].[{M}H]	46.4003	93.9163
					C(O[{M}])(CO[{M}])CO_[{M}].[{M}].[{M}]>>C(O[{M}])(CO[{M}])(CO_[{M}])[{M}].[{M}H]	-36.1845	65.3288
					C(O[{M}])(CO[{M}])(CO_[{M}])[{M}]>>C(C=O)(CO_[{M}])(O[{M}])[{M}].[{M}H]	-83.2639	17.3079
					C(C=O)(CO_[{M}])(O[{M}])[{M}].[{M}].[{M}]>>C(=O)(C(=O)CO_[{M}])[{M}].[{M}].[{M}].[{M}H]	-26.9444	74.7537
					C(=O)(C(=O)CO_[{M}])[{M}].[{M}].[{M}]>>C(=O)([{M}])[{M}].C(=O)(CO_[{M}])[{M}]	-119.788	74.2951
					C(=O)([{M}])[{M}]>>O=[C:].[{M}].[{M}]	102.221	0
					the above pathway is of length 8 and contains
					rule OHadsorption2 occurs 1 times
					rule CHscission occurs 1 times
					rule CHscission3 occurs 1 times
					rule CCscission occurs 1 times
					rule OHscission occurs 1 times
					rule OHscission2 occurs 1 times
					rule CdoubleOFormation occurs 1 times
					rule CarbonMonoxideFormation occurs 1 times
					Max Ea is			93.9163
					C(CO)(CO)O.[{M}].[{M}]>>C(O_[{M}])(CO)CO_[{M}]	-36.8737	0
					C(O_[{M}])(CO)CO_[{M}].[{M}].[{M}]>>C(O[{M}])(CO_[{M}])CO_[{M}].[{M}H]	23.3108	74.0593
					C(O[{M}])(CO_[{M}])CO_[{M}].[{M}].[{M}]>>C(O[{M}])(CO[{M}])CO_[{M}].[{M}].[{M}H]	40.5136	88.8537
					C(O[{M}])(CO[{M}])CO_[{M}].[{M}].[{M}]>>C(O[{M}])(CO[{M}])(CO_[{M}])[{M}].[{M}H]	-36.1845	65.3288
					C(O[{M}])(CO[{M}])(CO_[{M}])[{M}]>>C(C=O)(CO_[{M}])(O[{M}])[{M}].[{M}H]	-83.2639	17.3079
					C(C=O)(CO_[{M}])(O[{M}])[{M}].[{M}].[{M}]>>C(=O)(C(=O)CO_[{M}])[{M}].[{M}].[{M}].[{M}H]	-26.9444	74.7537
					C(=O)(C(=O)CO_[{M}])[{M}].[{M}].[{M}]>>C(=O)([{M}])[{M}].C(=O)(CO_[{M}])[{M}]	-119.788	74.2951
					C(=O)([{M}])[{M}]>>O=[C:].[{M}].[{M}]	102.221	0
					the above pathway is of length 8 and contains
					rule OHadsorption2 occurs 1 times
					rule CHscission occurs 1 times
					rule CHscission3 occurs 1 times
					rule CCscission occurs 1 times
					rule OHscission2 occurs 1 times
					rule OHscission4 occurs 1 times
					rule CdoubleOFormation occurs 1 times
					rule CarbonMonoxideFormation occurs 1 times
					Max Ea is			88.8537
					C(CO)(CO)O.[{M}].[{M}]>>C(O_[{M}])(CO)CO_[{M}]	-36.8737	0
					C(O_[{M}])(CO)CO_[{M}].[{M}].[{M}]>>C(C(O_[{M}])CO_[{M}])([{M}])O.[{M}H]	-79.7489	20.8931
					C(C(O_[{M}])CO_[{M}])([{M}])O.[{M}].[{M}]>>C(C([{M}])O)(CO_[{M}])([{M}])O.[{M}].[{M}H]	-7.20837	94.8845
					C(C([{M}])O)(CO_[{M}])([{M}])O>>C(=O)(C([{M}])O)CO_[{M}].[{M}H]	26.39	76.7074
					C(=O)(C([{M}])O)CO_[{M}].[{M}].[{M}]>>C(=O)(C(O[{M}])[{M}])CO_[{M}].[{M}H]	38.8376	87.4123
					C(=O)(C(O[{M}])[{M}])CO_[{M}].[{M}].[{M}]>>C(=O)(C(=O)CO_[{M}])[{M}].[{M}].[{M}].[{M}H]	-60.8387	40.1816
					C(=O)(C(=O)CO_[{M}])[{M}].[{M}].[{M}]>>C(=O)([{M}])[{M}].C(=O)(CO_[{M}])[{M}]	-119.788	74.2951
					C(=O)([{M}])[{M}]>>O=[C:].[{M}].[{M}]	102.221	0
					the above pathway is of length 8 and contains
					rule OHadsorption2 occurs 1 times
					rule CHscission occurs 1 times
					rule CHscission2 occurs 1 times
					rule CHscission4 occurs 1 times
					rule CCscission occurs 1 times
					rule OHscission occurs 1 times
					rule CdoubleOFromCOH occurs 1 times
					rule CarbonMonoxideFormation occurs 1 times
					Max Ea is			94.8845
					C(CO)(CO)O.[{M}].[{M}]>>C(O_[{M}])(CO)CO_[{M}]	-36.8737	0
					C(O_[{M}])(CO)CO_[{M}].[{M}].[{M}]>>C(CO_[{M}])(CO_[{M}])([{M}])O.[{M}H]	-51.7113	49.4915
					C(CO_[{M}])(CO_[{M}])([{M}])O.[{M}].[{M}]>>C(C([{M}])O)(CO_[{M}])([{M}])O.[{M}].[{M}H]	-35.246	66.2861
					C(C([{M}])O)(CO_[{M}])([{M}])O>>C(=O)(C([{M}])O)CO_[{M}].[{M}H]	26.39	76.7074
					C(=O)(C([{M}])O)CO_[{M}].[{M}].[{M}]>>C(=O)(C(O[{M}])[{M}])CO_[{M}].[{M}H]	38.8376	87.4123
					C(=O)(C(O[{M}])[{M}])CO_[{M}].[{M}].[{M}]>>C(=O)(C(=O)CO_[{M}])[{M}].[{M}].[{M}].[{M}H]	-60.8387	40.1816
					C(=O)(C(=O)CO_[{M}])[{M}].[{M}].[{M}]>>C(=O)([{M}])[{M}].C(=O)(CO_[{M}])[{M}]	-119.788	74.2951
					C(=O)([{M}])[{M}]>>O=[C:].[{M}].[{M}]	102.221	0
					the above pathway is of length 8 and contains
					rule OHadsorption2 occurs 1 times
					rule CHscission2 occurs 1 times
					rule CHscission4 occurs 1 times
					rule CHscission7 occurs 1 times
					rule CCscission occurs 1 times
					rule OHscission occurs 1 times
					rule CdoubleOFromCOH occurs 1 times
					rule CarbonMonoxideFormation occurs 1 times
					Max Ea is			87.4123
					C(CO)(CO)O.[{M}].[{M}]>>C(O_[{M}])(CO)CO_[{M}]	-36.8737	0
					C(O_[{M}])(CO)CO_[{M}].[{M}].[{M}]>>C(C(O_[{M}])CO_[{M}])([{M}])O.[{M}H]	-79.7489	20.8931
					C(C(O_[{M}])CO_[{M}])([{M}])O.[{M}].[{M}]>>C(C([{M}])O)(CO_[{M}])O[{M}].[{M}].[{M}H]	46.4003	93.9163
					C(C([{M}])O)(CO_[{M}])O[{M}]>>C(=O)(C([{M}])O)CO_[{M}].[{M}H]	-27.2187	74.474
					C(=O)(C([{M}])O)CO_[{M}].[{M}].[{M}]>>C(=O)(C(O[{M}])[{M}])CO_[{M}].[{M}H]	38.8376	87.4123
					C(=O)(C(O[{M}])[{M}])CO_[{M}].[{M}].[{M}]>>C(=O)(C(=O)CO_[{M}])[{M}].[{M}].[{M}].[{M}H]	-60.8387	40.1816
					C(=O)(C(=O)CO_[{M}])[{M}].[{M}].[{M}]>>C(=O)([{M}])[{M}].C(=O)(CO_[{M}])[{M}]	-119.788	74.2951
					C(=O)([{M}])[{M}]>>O=[C:].[{M}].[{M}]	102.221	0
					the above pathway is of length 8 and contains
					rule OHadsorption2 occurs 1 times
					rule CHscission occurs 1 times
					rule CHscission4 occurs 1 times
					rule CCscission occurs 1 times
					rule OHscission occurs 1 times
					rule OHscission2 occurs 1 times
					rule CdoubleOFormation occurs 1 times
					rule CarbonMonoxideFormation occurs 1 times
					Max Ea is			93.9163
					C(CO)(CO)O.[{M}].[{M}]>>C(O_[{M}])(CO)CO_[{M}]	-36.8737	0
					C(O_[{M}])(CO)CO_[{M}].[{M}].[{M}]>>C(O[{M}])(CO_[{M}])CO_[{M}].[{M}H]	23.3108	74.0593
					C(O[{M}])(CO_[{M}])CO_[{M}].[{M}].[{M}]>>C(C([{M}])O)(CO_[{M}])O[{M}].[{M}].[{M}H]	-56.6594	44.4444
					C(C([{M}])O)(CO_[{M}])O[{M}]>>C(=O)(C([{M}])O)CO_[{M}].[{M}H]	-27.2187	74.474
					C(=O)(C([{M}])O)CO_[{M}].[{M}].[{M}]>>C(=O)(C(O[{M}])[{M}])CO_[{M}].[{M}H]	38.8376	87.4123
					C(=O)(C(O[{M}])[{M}])CO_[{M}].[{M}].[{M}]>>C(=O)(C(=O)CO_[{M}])[{M}].[{M}].[{M}].[{M}H]	-60.8387	40.1816
					C(=O)(C(=O)CO_[{M}])[{M}].[{M}].[{M}]>>C(=O)([{M}])[{M}].C(=O)(CO_[{M}])[{M}]	-119.788	74.2951
					C(=O)([{M}])[{M}]>>O=[C:].[{M}].[{M}]	102.221	0
					the above pathway is of length 8 and contains
					rule OHadsorption2 occurs 1 times
					rule CHscission2 occurs 1 times
					rule CHscission4 occurs 1 times
					rule CCscission occurs 1 times
					rule OHscission occurs 1 times
					rule OHscission4 occurs 1 times
					rule CdoubleOFormation occurs 1 times
					rule CarbonMonoxideFormation occurs 1 times
					Max Ea is			87.4123
					C(CO)(CO)O.[{M}].[{M}]>>C(O_[{M}])(CO)CO_[{M}]	-36.8737	0
					C(O_[{M}])(CO)CO_[{M}].[{M}].[{M}]>>C(CO_[{M}])(CO_[{M}])([{M}])O.[{M}H]	-51.7113	49.4915
					C(CO_[{M}])(CO_[{M}])([{M}])O.[{M}].[{M}]>>C(O[{M}])(CO_[{M}])(CO_[{M}])[{M}].[{M}H]	38.8376	87.4123
					C(O[{M}])(CO_[{M}])(CO_[{M}])[{M}].[{M}].[{M}]>>C(=O)(C([{M}])O)CO_[{M}].[{M}].[{M}].[{M}].[{M}H]	-47.6935	53.5896
					C(=O)(C([{M}])O)CO_[{M}].[{M}].[{M}]>>C(=O)(C(O[{M}])[{M}])CO_[{M}].[{M}H]	38.8376	87.4123
					C(=O)(C(O[{M}])[{M}])CO_[{M}].[{M}].[{M}]>>C(=O)(C(=O)CO_[{M}])[{M}].[{M}].[{M}].[{M}H]	-60.8387	40.1816
					C(=O)(C(=O)CO_[{M}])[{M}].[{M}].[{M}]>>C(=O)([{M}])[{M}].C(=O)(CO_[{M}])[{M}]	-119.788	74.2951
					C(=O)([{M}])[{M}]>>O=[C:].[{M}].[{M}]	102.221	0
					the above pathway is of length 8 and contains
					rule OHadsorption2 occurs 1 times
					rule CHscission4 occurs 1 times
					rule CHscission5 occurs 1 times
					rule CHscission7 occurs 1 times
					rule CCscission occurs 1 times
					rule OHscission occurs 2 times
					rule CarbonMonoxideFormation occurs 1 times
					Max Ea is			87.4123
					C(CO)(CO)O.[{M}].[{M}]>>C(O_[{M}])(CO)CO_[{M}]	-36.8737	0
					C(O_[{M}])(CO)CO_[{M}].[{M}].[{M}]>>C(O[{M}])(CO_[{M}])CO_[{M}].[{M}H]	23.3108	74.0593
					C(O[{M}])(CO_[{M}])CO_[{M}].[{M}].[{M}]>>C(O[{M}])(CO_[{M}])(CO_[{M}])[{M}].[{M}H]	-36.1845	65.3288
					C(O[{M}])(CO_[{M}])(CO_[{M}])[{M}].[{M}].[{M}]>>C(=O)(C([{M}])O)CO_[{M}].[{M}].[{M}].[{M}].[{M}H]	-47.6935	53.5896
					C(=O)(C([{M}])O)CO_[{M}].[{M}].[{M}]>>C(=O)(C(O[{M}])[{M}])CO_[{M}].[{M}H]	38.8376	87.4123
					C(=O)(C(O[{M}])[{M}])CO_[{M}].[{M}].[{M}]>>C(=O)(C(=O)CO_[{M}])[{M}].[{M}].[{M}].[{M}H]	-60.8387	40.1816
					C(=O)(C(=O)CO_[{M}])[{M}].[{M}].[{M}]>>C(=O)([{M}])[{M}].C(=O)(CO_[{M}])[{M}]	-119.788	74.2951
					C(=O)([{M}])[{M}]>>O=[C:].[{M}].[{M}]	102.221	0
					the above pathway is of length 8 and contains
					rule OHadsorption2 occurs 1 times
					rule CHscission occurs 1 times
					rule CHscission4 occurs 1 times
					rule CHscission5 occurs 1 times
					rule CCscission occurs 1 times
					rule OHscission occurs 1 times
					rule OHscission4 occurs 1 times
					rule CarbonMonoxideFormation occurs 1 times
					Max Ea is			87.4123
					C(CO)(CO)O.[{M}].[{M}]>>C(O_[{M}])(CO)CO_[{M}]	-36.8737	0
					C(O_[{M}])(CO)CO_[{M}].[{M}].[{M}]>>C(C(O_[{M}])CO_[{M}])([{M}])O.[{M}H]	-79.7489	20.8931
					C(C(O_[{M}])CO_[{M}])([{M}])O.[{M}].[{M}]>>C(C(O_[{M}])CO_[{M}])(O[{M}])[{M}].[{M}H]	38.8376	87.4123
					C(C(O_[{M}])CO_[{M}])(O[{M}])[{M}].[{M}].[{M}]>>C(C(O[{M}])CO_[{M}])(O[{M}])[{M}].[{M}].[{M}H]	46.4003	93.9163
					C(C(O[{M}])CO_[{M}])(O[{M}])[{M}]>>C(=O)(C(O[{M}])[{M}])CO_[{M}].[{M}H]	-27.2187	74.474
					C(=O)(C(O[{M}])[{M}])CO_[{M}].[{M}].[{M}]>>C(=O)(C(=O)CO_[{M}])[{M}].[{M}].[{M}].[{M}H]	-60.8387	40.1816
					C(=O)(C(=O)CO_[{M}])[{M}].[{M}].[{M}]>>C(=O)([{M}])[{M}].C(=O)(CO_[{M}])[{M}]	-119.788	74.2951
					C(=O)([{M}])[{M}]>>O=[C:].[{M}].[{M}]	102.221	0
					the above pathway is of length 8 and contains
					rule OHadsorption2 occurs 1 times
					rule CHscission occurs 1 times
					rule CHscission4 occurs 1 times
					rule CCscission occurs 1 times
					rule OHscission occurs 1 times
					rule OHscission2 occurs 1 times
					rule CdoubleOFormation occurs 1 times
					rule CarbonMonoxideFormation occurs 1 times
					Max Ea is			93.9163
					C(CO)(CO)O.[{M}].[{M}]>>C(O_[{M}])(CO)CO_[{M}]	-36.8737	0
					C(O_[{M}])(CO)CO_[{M}].[{M}].[{M}]>>C(O_[{M}])(CO[{M}])CO_[{M}].[{M}H]	17.4241	68.9967
					C(O_[{M}])(CO[{M}])CO_[{M}].[{M}].[{M}]>>C(C(O_[{M}])CO_[{M}])(O[{M}])[{M}].[{M}H]	-58.3355	42.7348
					C(C(O_[{M}])CO_[{M}])(O[{M}])[{M}].[{M}].[{M}]>>C(C(O[{M}])CO_[{M}])(O[{M}])[{M}].[{M}].[{M}H]	46.4003	93.9163
					C(C(O[{M}])CO_[{M}])(O[{M}])[{M}]>>C(=O)(C(O[{M}])[{M}])CO_[{M}].[{M}H]	-27.2187	74.474
					C(=O)(C(O[{M}])[{M}])CO_[{M}].[{M}].[{M}]>>C(=O)(C(=O)CO_[{M}])[{M}].[{M}].[{M}].[{M}H]	-60.8387	40.1816
					C(=O)(C(=O)CO_[{M}])[{M}].[{M}].[{M}]>>C(=O)([{M}])[{M}].C(=O)(CO_[{M}])[{M}]	-119.788	74.2951
					C(=O)([{M}])[{M}]>>O=[C:].[{M}].[{M}]	102.221	0
					the above pathway is of length 8 and contains
					rule OHadsorption2 occurs 1 times
					rule CHscission occurs 1 times
					rule CHscission4 occurs 1 times
					rule CCscission occurs 1 times
					rule OHscission occurs 1 times
					rule OHscission2 occurs 1 times
					rule CdoubleOFormation occurs 1 times
					rule CarbonMonoxideFormation occurs 1 times
					Max Ea is			93.9163
					C(CO)(CO)O.[{M}].[{M}]>>C(O_[{M}])(CO)CO_[{M}]	-36.8737	0
					C(O_[{M}])(CO)CO_[{M}].[{M}].[{M}]>>C(C(O_[{M}])CO_[{M}])([{M}])O.[{M}H]	-79.7489	20.8931
					C(C(O_[{M}])CO_[{M}])([{M}])O.[{M}].[{M}]>>C(C([{M}])O)(CO_[{M}])O[{M}].[{M}].[{M}H]	46.4003	93.9163
					C(C([{M}])O)(CO_[{M}])O[{M}].[{M}].[{M}]>>C(C(O[{M}])CO_[{M}])(O[{M}])[{M}].[{M}H]	38.8376	87.4123
					C(C(O[{M}])CO_[{M}])(O[{M}])[{M}]>>C(=O)(C(O[{M}])[{M}])CO_[{M}].[{M}H]	-27.2187	74.474
					C(=O)(C(O[{M}])[{M}])CO_[{M}].[{M}].[{M}]>>C(=O)(C(=O)CO_[{M}])[{M}].[{M}].[{M}].[{M}H]	-60.8387	40.1816
					C(=O)(C(=O)CO_[{M}])[{M}].[{M}].[{M}]>>C(=O)([{M}])[{M}].C(=O)(CO_[{M}])[{M}]	-119.788	74.2951
					C(=O)([{M}])[{M}]>>O=[C:].[{M}].[{M}]	102.221	0
					the above pathway is of length 8 and contains
					rule OHadsorption2 occurs 1 times
					rule CHscission occurs 1 times
					rule CHscission4 occurs 1 times
					rule CCscission occurs 1 times
					rule OHscission occurs 1 times
					rule OHscission2 occurs 1 times
					rule CdoubleOFormation occurs 1 times
					rule CarbonMonoxideFormation occurs 1 times
					Max Ea is			93.9163
					C(CO)(CO)O.[{M}].[{M}]>>C(O_[{M}])(CO)CO_[{M}]	-36.8737	0
					C(O_[{M}])(CO)CO_[{M}].[{M}].[{M}]>>C(O[{M}])(CO_[{M}])CO_[{M}].[{M}H]	23.3108	74.0593
					C(O[{M}])(CO_[{M}])CO_[{M}].[{M}].[{M}]>>C(C([{M}])O)(CO_[{M}])O[{M}].[{M}].[{M}H]	-56.6594	44.4444
					C(C([{M}])O)(CO_[{M}])O[{M}].[{M}].[{M}]>>C(C(O[{M}])CO_[{M}])(O[{M}])[{M}].[{M}H]	38.8376	87.4123
					C(C(O[{M}])CO_[{M}])(O[{M}])[{M}]>>C(=O)(C(O[{M}])[{M}])CO_[{M}].[{M}H]	-27.2187	74.474
					C(=O)(C(O[{M}])[{M}])CO_[{M}].[{M}].[{M}]>>C(=O)(C(=O)CO_[{M}])[{M}].[{M}].[{M}].[{M}H]	-60.8387	40.1816
					C(=O)(C(=O)CO_[{M}])[{M}].[{M}].[{M}]>>C(=O)([{M}])[{M}].C(=O)(CO_[{M}])[{M}]	-119.788	74.2951
					C(=O)([{M}])[{M}]>>O=[C:].[{M}].[{M}]	102.221	0
					the above pathway is of length 8 and contains
					rule OHadsorption2 occurs 1 times
					rule CHscission2 occurs 1 times
					rule CHscission4 occurs 1 times
					rule CCscission occurs 1 times
					rule OHscission occurs 1 times
					rule OHscission4 occurs 1 times
					rule CdoubleOFormation occurs 1 times
					rule CarbonMonoxideFormation occurs 1 times
					Max Ea is			87.4123
					C(CO)(CO)O.[{M}].[{M}]>>C(O_[{M}])(CO)CO_[{M}]	-36.8737	0
					C(O_[{M}])(CO)CO_[{M}].[{M}].[{M}]>>C(O_[{M}])(CO[{M}])CO_[{M}].[{M}H]	17.4241	68.9967
					C(O_[{M}])(CO[{M}])CO_[{M}].[{M}].[{M}]>>C(O[{M}])(CO[{M}])CO_[{M}].[{M}].[{M}H]	46.4003	93.9163
					C(O[{M}])(CO[{M}])CO_[{M}].[{M}].[{M}]>>C(C(O[{M}])CO_[{M}])(O[{M}])[{M}].[{M}H]	-58.3355	42.7348
					C(C(O[{M}])CO_[{M}])(O[{M}])[{M}]>>C(=O)(C(O[{M}])[{M}])CO_[{M}].[{M}H]	-27.2187	74.474
					C(=O)(C(O[{M}])[{M}])CO_[{M}].[{M}].[{M}]>>C(=O)(C(=O)CO_[{M}])[{M}].[{M}].[{M}].[{M}H]	-60.8387	40.1816
					C(=O)(C(=O)CO_[{M}])[{M}].[{M}].[{M}]>>C(=O)([{M}])[{M}].C(=O)(CO_[{M}])[{M}]	-119.788	74.2951
					C(=O)([{M}])[{M}]>>O=[C:].[{M}].[{M}]	102.221	0
					the above pathway is of length 8 and contains
					rule OHadsorption2 occurs 1 times
					rule CHscission occurs 1 times
					rule CHscission4 occurs 1 times
					rule CCscission occurs 1 times
					rule OHscission occurs 1 times
					rule OHscission2 occurs 1 times
					rule CdoubleOFormation occurs 1 times
					rule CarbonMonoxideFormation occurs 1 times
					Max Ea is			93.9163
					C(CO)(CO)O.[{M}].[{M}]>>C(O_[{M}])(CO)CO_[{M}]	-36.8737	0
					C(O_[{M}])(CO)CO_[{M}].[{M}].[{M}]>>C(O[{M}])(CO_[{M}])CO_[{M}].[{M}H]	23.3108	74.0593
					C(O[{M}])(CO_[{M}])CO_[{M}].[{M}].[{M}]>>C(O[{M}])(CO[{M}])CO_[{M}].[{M}].[{M}H]	40.5136	88.8537
					C(O[{M}])(CO[{M}])CO_[{M}].[{M}].[{M}]>>C(C(O[{M}])CO_[{M}])(O[{M}])[{M}].[{M}H]	-58.3355	42.7348
					C(C(O[{M}])CO_[{M}])(O[{M}])[{M}]>>C(=O)(C(O[{M}])[{M}])CO_[{M}].[{M}H]	-27.2187	74.474
					C(=O)(C(O[{M}])[{M}])CO_[{M}].[{M}].[{M}]>>C(=O)(C(=O)CO_[{M}])[{M}].[{M}].[{M}].[{M}H]	-60.8387	40.1816
					C(=O)(C(=O)CO_[{M}])[{M}].[{M}].[{M}]>>C(=O)([{M}])[{M}].C(=O)(CO_[{M}])[{M}]	-119.788	74.2951
					C(=O)([{M}])[{M}]>>O=[C:].[{M}].[{M}]	102.221	0
					the above pathway is of length 8 and contains
					rule OHadsorption2 occurs 1 times
					rule CHscission occurs 1 times
					rule CHscission4 occurs 1 times
					rule CCscission occurs 1 times
					rule OHscission2 occurs 1 times
					rule OHscission4 occurs 1 times
					rule CdoubleOFormation occurs 1 times
					rule CarbonMonoxideFormation occurs 1 times
					Max Ea is			88.8537
					C(CO)(CO)O.[{M}].[{M}]>>C(O_[{M}])(CO)CO_[{M}]	-36.8737	0
					C(O_[{M}])(CO)CO_[{M}].[{M}].[{M}]>>C(CO_[{M}])(CO_[{M}])([{M}])O.[{M}H]	-51.7113	49.4915
					C(CO_[{M}])(CO_[{M}])([{M}])O.[{M}].[{M}]>>C(O[{M}])(CO_[{M}])(CO_[{M}])[{M}].[{M}H]	38.8376	87.4123
					C(O[{M}])(CO_[{M}])(CO_[{M}])[{M}].[{M}].[{M}]>>C(O[{M}])(CO[{M}])(CO_[{M}])[{M}].[{M}].[{M}H]	40.5136	88.8537
					C(O[{M}])(CO[{M}])(CO_[{M}])[{M}].[{M}].[{M}]>>C(=O)(C(O[{M}])[{M}])CO_[{M}].[{M}].[{M}].[{M}H]	-49.3696	51.88
					C(=O)(C(O[{M}])[{M}])CO_[{M}].[{M}].[{M}]>>C(=O)(C(=O)CO_[{M}])[{M}].[{M}].[{M}].[{M}H]	-60.8387	40.1816
					C(=O)(C(=O)CO_[{M}])[{M}].[{M}].[{M}]>>C(=O)([{M}])[{M}].C(=O)(CO_[{M}])[{M}]	-119.788	74.2951
					C(=O)([{M}])[{M}]>>O=[C:].[{M}].[{M}]	102.221	0
					the above pathway is of length 8 and contains
					rule OHadsorption2 occurs 1 times
					rule CHscission3 occurs 1 times
					rule CHscission4 occurs 1 times
					rule CHscission7 occurs 1 times
					rule CCscission occurs 1 times
					rule OHscission occurs 1 times
					rule OHscission2 occurs 1 times
					rule CarbonMonoxideFormation occurs 1 times
					Max Ea is			88.8537
					C(CO)(CO)O.[{M}].[{M}]>>C(O_[{M}])(CO)CO_[{M}]	-36.8737	0
					C(O_[{M}])(CO)CO_[{M}].[{M}].[{M}]>>C(O[{M}])(CO_[{M}])CO_[{M}].[{M}H]	23.3108	74.0593
					C(O[{M}])(CO_[{M}])CO_[{M}].[{M}].[{M}]>>C(O[{M}])(CO_[{M}])(CO_[{M}])[{M}].[{M}H]	-36.1845	65.3288
					C(O[{M}])(CO_[{M}])(CO_[{M}])[{M}].[{M}].[{M}]>>C(O[{M}])(CO[{M}])(CO_[{M}])[{M}].[{M}].[{M}H]	40.5136	88.8537
					C(O[{M}])(CO[{M}])(CO_[{M}])[{M}].[{M}].[{M}]>>C(=O)(C(O[{M}])[{M}])CO_[{M}].[{M}].[{M}].[{M}H]	-49.3696	51.88
					C(=O)(C(O[{M}])[{M}])CO_[{M}].[{M}].[{M}]>>C(=O)(C(=O)CO_[{M}])[{M}].[{M}].[{M}].[{M}H]	-60.8387	40.1816
					C(=O)(C(=O)CO_[{M}])[{M}].[{M}].[{M}]>>C(=O)([{M}])[{M}].C(=O)(CO_[{M}])[{M}]	-119.788	74.2951
					C(=O)([{M}])[{M}]>>O=[C:].[{M}].[{M}]	102.221	0
					the above pathway is of length 8 and contains
					rule OHadsorption2 occurs 1 times
					rule CHscission occurs 1 times
					rule CHscission3 occurs 1 times
					rule CHscission4 occurs 1 times
					rule CCscission occurs 1 times
					rule OHscission2 occurs 1 times
					rule OHscission4 occurs 1 times
					rule CarbonMonoxideFormation occurs 1 times
					Max Ea is			88.8537
					C(CO)(CO)O.[{M}].[{M}]>>C(O_[{M}])(CO)CO_[{M}]	-36.8737	0
					C(O_[{M}])(CO)CO_[{M}].[{M}].[{M}]>>C(CO_[{M}])(CO_[{M}])([{M}])O.[{M}H]	-51.7113	49.4915
					C(CO_[{M}])(CO_[{M}])([{M}])O.[{M}].[{M}]>>C(CO[{M}])(CO_[{M}])([{M}])O.[{M}].[{M}H]	40.5136	88.8537
					C(CO[{M}])(CO_[{M}])([{M}])O.[{M}].[{M}]>>C(O[{M}])(CO[{M}])(CO_[{M}])[{M}].[{M}H]	38.8376	87.4123
					C(O[{M}])(CO[{M}])(CO_[{M}])[{M}].[{M}].[{M}]>>C(=O)(C(O[{M}])[{M}])CO_[{M}].[{M}].[{M}].[{M}H]	-49.3696	51.88
					C(=O)(C(O[{M}])[{M}])CO_[{M}].[{M}].[{M}]>>C(=O)(C(=O)CO_[{M}])[{M}].[{M}].[{M}].[{M}H]	-60.8387	40.1816
					C(=O)(C(=O)CO_[{M}])[{M}].[{M}].[{M}]>>C(=O)([{M}])[{M}].C(=O)(CO_[{M}])[{M}]	-119.788	74.2951
					C(=O)([{M}])[{M}]>>O=[C:].[{M}].[{M}]	102.221	0
					the above pathway is of length 8 and contains
					rule OHadsorption2 occurs 1 times
					rule CHscission3 occurs 1 times
					rule CHscission4 occurs 1 times
					rule CHscission7 occurs 1 times
					rule CCscission occurs 1 times
					rule OHscission occurs 1 times
					rule OHscission2 occurs 1 times
					rule CarbonMonoxideFormation occurs 1 times
					Max Ea is			88.8537
					C(CO)(CO)O.[{M}].[{M}]>>C(O_[{M}])(CO)CO_[{M}]	-36.8737	0
					C(O_[{M}])(CO)CO_[{M}].[{M}].[{M}]>>C(O_[{M}])(CO[{M}])CO_[{M}].[{M}H]	17.4241	68.9967
					C(O_[{M}])(CO[{M}])CO_[{M}].[{M}].[{M}]>>C(CO[{M}])(CO_[{M}])([{M}])O.[{M}].[{M}H]	-28.6218	73.0428
					C(CO[{M}])(CO_[{M}])([{M}])O.[{M}].[{M}]>>C(O[{M}])(CO[{M}])(CO_[{M}])[{M}].[{M}H]	38.8376	87.4123
					C(O[{M}])(CO[{M}])(CO_[{M}])[{M}].[{M}].[{M}]>>C(=O)(C(O[{M}])[{M}])CO_[{M}].[{M}].[{M}].[{M}H]	-49.3696	51.88
					C(=O)(C(O[{M}])[{M}])CO_[{M}].[{M}].[{M}]>>C(=O)(C(=O)CO_[{M}])[{M}].[{M}].[{M}].[{M}H]	-60.8387	40.1816
					C(=O)(C(=O)CO_[{M}])[{M}].[{M}].[{M}]>>C(=O)([{M}])[{M}].C(=O)(CO_[{M}])[{M}]	-119.788	74.2951
					C(=O)([{M}])[{M}]>>O=[C:].[{M}].[{M}]	102.221	0
					the above pathway is of length 8 and contains
					rule OHadsorption2 occurs 1 times
					rule CHscission2 occurs 1 times
					rule CHscission3 occurs 1 times
					rule CHscission4 occurs 1 times
					rule CCscission occurs 1 times
					rule OHscission occurs 2 times
					rule CarbonMonoxideFormation occurs 1 times
					Max Ea is			87.4123
					C(CO)(CO)O.[{M}].[{M}]>>C(O_[{M}])(CO)CO_[{M}]	-36.8737	0
					C(O_[{M}])(CO)CO_[{M}].[{M}].[{M}]>>C(O_[{M}])(CO[{M}])CO_[{M}].[{M}H]	17.4241	68.9967
					C(O_[{M}])(CO[{M}])CO_[{M}].[{M}].[{M}]>>C(O[{M}])(CO[{M}])CO_[{M}].[{M}].[{M}H]	46.4003	93.9163
					C(O[{M}])(CO[{M}])CO_[{M}].[{M}].[{M}]>>C(O[{M}])(CO[{M}])(CO_[{M}])[{M}].[{M}H]	-36.1845	65.3288
					C(O[{M}])(CO[{M}])(CO_[{M}])[{M}].[{M}].[{M}]>>C(=O)(C(O[{M}])[{M}])CO_[{M}].[{M}].[{M}].[{M}H]	-49.3696	51.88
					C(=O)(C(O[{M}])[{M}])CO_[{M}].[{M}].[{M}]>>C(=O)(C(=O)CO_[{M}])[{M}].[{M}].[{M}].[{M}H]	-60.8387	40.1816
					C(=O)(C(=O)CO_[{M}])[{M}].[{M}].[{M}]>>C(=O)([{M}])[{M}].C(=O)(CO_[{M}])[{M}]	-119.788	74.2951
					C(=O)([{M}])[{M}]>>O=[C:].[{M}].[{M}]	102.221	0
					the above pathway is of length 8 and contains
					rule OHadsorption2 occurs 1 times
					rule CHscission occurs 1 times
					rule CHscission3 occurs 1 times
					rule CHscission4 occurs 1 times
					rule CCscission occurs 1 times
					rule OHscission occurs 1 times
					rule OHscission2 occurs 1 times
					rule CarbonMonoxideFormation occurs 1 times
					Max Ea is			93.9163
					C(CO)(CO)O.[{M}].[{M}]>>C(O_[{M}])(CO)CO_[{M}]	-36.8737	0
					C(O_[{M}])(CO)CO_[{M}].[{M}].[{M}]>>C(O[{M}])(CO_[{M}])CO_[{M}].[{M}H]	23.3108	74.0593
					C(O[{M}])(CO_[{M}])CO_[{M}].[{M}].[{M}]>>C(O[{M}])(CO[{M}])CO_[{M}].[{M}].[{M}H]	40.5136	88.8537
					C(O[{M}])(CO[{M}])CO_[{M}].[{M}].[{M}]>>C(O[{M}])(CO[{M}])(CO_[{M}])[{M}].[{M}H]	-36.1845	65.3288
					C(O[{M}])(CO[{M}])(CO_[{M}])[{M}].[{M}].[{M}]>>C(=O)(C(O[{M}])[{M}])CO_[{M}].[{M}].[{M}].[{M}H]	-49.3696	51.88
					C(=O)(C(O[{M}])[{M}])CO_[{M}].[{M}].[{M}]>>C(=O)(C(=O)CO_[{M}])[{M}].[{M}].[{M}].[{M}H]	-60.8387	40.1816
					C(=O)(C(=O)CO_[{M}])[{M}].[{M}].[{M}]>>C(=O)([{M}])[{M}].C(=O)(CO_[{M}])[{M}]	-119.788	74.2951
					C(=O)([{M}])[{M}]>>O=[C:].[{M}].[{M}]	102.221	0
					the above pathway is of length 8 and contains
					rule OHadsorption2 occurs 1 times
					rule CHscission occurs 1 times
					rule CHscission3 occurs 1 times
					rule CHscission4 occurs 1 times
					rule CCscission occurs 1 times
					rule OHscission2 occurs 1 times
					rule OHscission4 occurs 1 times
					rule CarbonMonoxideFormation occurs 1 times
					Max Ea is			88.8537
					C(CO)(CO)O.[{M}].[{M}]>>C(O_[{M}])(CO)CO_[{M}]	-36.8737	0
					C(O_[{M}])(CO)CO_[{M}].[{M}].[{M}]>>C(C(O_[{M}])CO_[{M}])([{M}])O.[{M}H]	-79.7489	20.8931
					C(C(O_[{M}])CO_[{M}])([{M}])O.[{M}].[{M}]>>C(C([{M}])O)(CO_[{M}])([{M}])O.[{M}].[{M}H]	-7.20837	94.8845
					C(C([{M}])O)(CO_[{M}])([{M}])O>>C(=O)(C([{M}])O)CO_[{M}].[{M}H]	26.39	76.7074
					C(=O)(C([{M}])O)CO_[{M}].[{M}].[{M}]>>C(=O)(C(O[{M}])[{M}])CO_[{M}].[{M}H]	38.8376	87.4123
					C(=O)(C(O[{M}])[{M}])CO_[{M}]>>C(=O)(C(=O)CO_[{M}])[{M}].[{M}H]	-60.8387	40.1816
					C(=O)(C(=O)CO_[{M}])[{M}].[{M}].[{M}]>>C(=O)([{M}])[{M}].C(=O)(CO_[{M}])[{M}]	-119.788	74.2951
					C(=O)([{M}])[{M}]>>O=[C:].[{M}].[{M}]	102.221	0
					the above pathway is of length 8 and contains
					rule OHadsorption2 occurs 1 times
					rule CHscission occurs 1 times
					rule CHscission2 occurs 1 times
					rule CCscission occurs 1 times
					rule OHscission occurs 1 times
					rule CdoubleOFormation occurs 1 times
					rule CdoubleOFromCOH occurs 1 times
					rule CarbonMonoxideFormation occurs 1 times
					Max Ea is			94.8845
					C(CO)(CO)O.[{M}].[{M}]>>C(O_[{M}])(CO)CO_[{M}]	-36.8737	0
					C(O_[{M}])(CO)CO_[{M}].[{M}].[{M}]>>C(CO_[{M}])(CO_[{M}])([{M}])O.[{M}H]	-51.7113	49.4915
					C(CO_[{M}])(CO_[{M}])([{M}])O.[{M}].[{M}]>>C(C([{M}])O)(CO_[{M}])([{M}])O.[{M}].[{M}H]	-35.246	66.2861
					C(C([{M}])O)(CO_[{M}])([{M}])O>>C(=O)(C([{M}])O)CO_[{M}].[{M}H]	26.39	76.7074
					C(=O)(C([{M}])O)CO_[{M}].[{M}].[{M}]>>C(=O)(C(O[{M}])[{M}])CO_[{M}].[{M}H]	38.8376	87.4123
					C(=O)(C(O[{M}])[{M}])CO_[{M}]>>C(=O)(C(=O)CO_[{M}])[{M}].[{M}H]	-60.8387	40.1816
					C(=O)(C(=O)CO_[{M}])[{M}].[{M}].[{M}]>>C(=O)([{M}])[{M}].C(=O)(CO_[{M}])[{M}]	-119.788	74.2951
					C(=O)([{M}])[{M}]>>O=[C:].[{M}].[{M}]	102.221	0
					the above pathway is of length 8 and contains
					rule OHadsorption2 occurs 1 times
					rule CHscission2 occurs 1 times
					rule CHscission7 occurs 1 times
					rule CCscission occurs 1 times
					rule OHscission occurs 1 times
					rule CdoubleOFormation occurs 1 times
					rule CdoubleOFromCOH occurs 1 times
					rule CarbonMonoxideFormation occurs 1 times
					Max Ea is			87.4123
					C(CO)(CO)O.[{M}].[{M}]>>C(O_[{M}])(CO)CO_[{M}]	-36.8737	0
					C(O_[{M}])(CO)CO_[{M}].[{M}].[{M}]>>C(C(O_[{M}])CO_[{M}])([{M}])O.[{M}H]	-79.7489	20.8931
					C(C(O_[{M}])CO_[{M}])([{M}])O.[{M}].[{M}]>>C(C([{M}])O)(CO_[{M}])O[{M}].[{M}].[{M}H]	46.4003	93.9163
					C(C([{M}])O)(CO_[{M}])O[{M}]>>C(=O)(C([{M}])O)CO_[{M}].[{M}H]	-27.2187	74.474
					C(=O)(C([{M}])O)CO_[{M}].[{M}].[{M}]>>C(=O)(C(O[{M}])[{M}])CO_[{M}].[{M}H]	38.8376	87.4123
					C(=O)(C(O[{M}])[{M}])CO_[{M}]>>C(=O)(C(=O)CO_[{M}])[{M}].[{M}H]	-60.8387	40.1816
					C(=O)(C(=O)CO_[{M}])[{M}].[{M}].[{M}]>>C(=O)([{M}])[{M}].C(=O)(CO_[{M}])[{M}]	-119.788	74.2951
					C(=O)([{M}])[{M}]>>O=[C:].[{M}].[{M}]	102.221	0
					the above pathway is of length 8 and contains
					rule OHadsorption2 occurs 1 times
					rule CHscission occurs 1 times
					rule CCscission occurs 1 times
					rule OHscission occurs 1 times
					rule OHscission2 occurs 1 times
					rule CdoubleOFormation occurs 2 times
					rule CarbonMonoxideFormation occurs 1 times
					Max Ea is			93.9163
					C(CO)(CO)O.[{M}].[{M}]>>C(O_[{M}])(CO)CO_[{M}]	-36.8737	0
					C(O_[{M}])(CO)CO_[{M}].[{M}].[{M}]>>C(O[{M}])(CO_[{M}])CO_[{M}].[{M}H]	23.3108	74.0593
					C(O[{M}])(CO_[{M}])CO_[{M}].[{M}].[{M}]>>C(C([{M}])O)(CO_[{M}])O[{M}].[{M}].[{M}H]	-56.6594	44.4444
					C(C([{M}])O)(CO_[{M}])O[{M}]>>C(=O)(C([{M}])O)CO_[{M}].[{M}H]	-27.2187	74.474
					C(=O)(C([{M}])O)CO_[{M}].[{M}].[{M}]>>C(=O)(C(O[{M}])[{M}])CO_[{M}].[{M}H]	38.8376	87.4123
					C(=O)(C(O[{M}])[{M}])CO_[{M}]>>C(=O)(C(=O)CO_[{M}])[{M}].[{M}H]	-60.8387	40.1816
					C(=O)(C(=O)CO_[{M}])[{M}].[{M}].[{M}]>>C(=O)([{M}])[{M}].C(=O)(CO_[{M}])[{M}]	-119.788	74.2951
					C(=O)([{M}])[{M}]>>O=[C:].[{M}].[{M}]	102.221	0
					the above pathway is of length 8 and contains
					rule OHadsorption2 occurs 1 times
					rule CHscission2 occurs 1 times
					rule CCscission occurs 1 times
					rule OHscission occurs 1 times
					rule OHscission4 occurs 1 times
					rule CdoubleOFormation occurs 2 times
					rule CarbonMonoxideFormation occurs 1 times
					Max Ea is			87.4123
					C(CO)(CO)O.[{M}].[{M}]>>C(O_[{M}])(CO)CO_[{M}]	-36.8737	0
					C(O_[{M}])(CO)CO_[{M}].[{M}].[{M}]>>C(CO_[{M}])(CO_[{M}])([{M}])O.[{M}H]	-51.7113	49.4915
					C(CO_[{M}])(CO_[{M}])([{M}])O.[{M}].[{M}]>>C(O[{M}])(CO_[{M}])(CO_[{M}])[{M}].[{M}H]	38.8376	87.4123
					C(O[{M}])(CO_[{M}])(CO_[{M}])[{M}].[{M}].[{M}]>>C(=O)(C([{M}])O)CO_[{M}].[{M}].[{M}].[{M}].[{M}H]	-47.6935	53.5896
					C(=O)(C([{M}])O)CO_[{M}].[{M}].[{M}]>>C(=O)(C(O[{M}])[{M}])CO_[{M}].[{M}H]	38.8376	87.4123
					C(=O)(C(O[{M}])[{M}])CO_[{M}]>>C(=O)(C(=O)CO_[{M}])[{M}].[{M}H]	-60.8387	40.1816
					C(=O)(C(=O)CO_[{M}])[{M}].[{M}].[{M}]>>C(=O)([{M}])[{M}].C(=O)(CO_[{M}])[{M}]	-119.788	74.2951
					C(=O)([{M}])[{M}]>>O=[C:].[{M}].[{M}]	102.221	0
					the above pathway is of length 8 and contains
					rule OHadsorption2 occurs 1 times
					rule CHscission5 occurs 1 times
					rule CHscission7 occurs 1 times
					rule CCscission occurs 1 times
					rule OHscission occurs 2 times
					rule CdoubleOFormation occurs 1 times
					rule CarbonMonoxideFormation occurs 1 times
					Max Ea is			87.4123
					C(CO)(CO)O.[{M}].[{M}]>>C(O_[{M}])(CO)CO_[{M}]	-36.8737	0
					C(O_[{M}])(CO)CO_[{M}].[{M}].[{M}]>>C(O[{M}])(CO_[{M}])CO_[{M}].[{M}H]	23.3108	74.0593
					C(O[{M}])(CO_[{M}])CO_[{M}].[{M}].[{M}]>>C(O[{M}])(CO_[{M}])(CO_[{M}])[{M}].[{M}H]	-36.1845	65.3288
					C(O[{M}])(CO_[{M}])(CO_[{M}])[{M}].[{M}].[{M}]>>C(=O)(C([{M}])O)CO_[{M}].[{M}].[{M}].[{M}].[{M}H]	-47.6935	53.5896
					C(=O)(C([{M}])O)CO_[{M}].[{M}].[{M}]>>C(=O)(C(O[{M}])[{M}])CO_[{M}].[{M}H]	38.8376	87.4123
					C(=O)(C(O[{M}])[{M}])CO_[{M}]>>C(=O)(C(=O)CO_[{M}])[{M}].[{M}H]	-60.8387	40.1816
					C(=O)(C(=O)CO_[{M}])[{M}].[{M}].[{M}]>>C(=O)([{M}])[{M}].C(=O)(CO_[{M}])[{M}]	-119.788	74.2951
					C(=O)([{M}])[{M}]>>O=[C:].[{M}].[{M}]	102.221	0
					the above pathway is of length 8 and contains
					rule OHadsorption2 occurs 1 times
					rule CHscission occurs 1 times
					rule CHscission5 occurs 1 times
					rule CCscission occurs 1 times
					rule OHscission occurs 1 times
					rule OHscission4 occurs 1 times
					rule CdoubleOFormation occurs 1 times
					rule CarbonMonoxideFormation occurs 1 times
					Max Ea is			87.4123
					C(CO)(CO)O.[{M}].[{M}]>>C(O_[{M}])(CO)CO_[{M}]	-36.8737	0
					C(O_[{M}])(CO)CO_[{M}].[{M}].[{M}]>>C(C(O_[{M}])CO_[{M}])([{M}])O.[{M}H]	-79.7489	20.8931
					C(C(O_[{M}])CO_[{M}])([{M}])O.[{M}].[{M}]>>C(C(O_[{M}])CO_[{M}])(O[{M}])[{M}].[{M}H]	38.8376	87.4123
					C(C(O_[{M}])CO_[{M}])(O[{M}])[{M}].[{M}].[{M}]>>C(C(O[{M}])CO_[{M}])(O[{M}])[{M}].[{M}].[{M}H]	46.4003	93.9163
					C(C(O[{M}])CO_[{M}])(O[{M}])[{M}]>>C(=O)(C(O[{M}])[{M}])CO_[{M}].[{M}H]	-27.2187	74.474
					C(=O)(C(O[{M}])[{M}])CO_[{M}]>>C(=O)(C(=O)CO_[{M}])[{M}].[{M}H]	-60.8387	40.1816
					C(=O)(C(=O)CO_[{M}])[{M}].[{M}].[{M}]>>C(=O)([{M}])[{M}].C(=O)(CO_[{M}])[{M}]	-119.788	74.2951
					C(=O)([{M}])[{M}]>>O=[C:].[{M}].[{M}]	102.221	0
					the above pathway is of length 8 and contains
					rule OHadsorption2 occurs 1 times
					rule CHscission occurs 1 times
					rule CCscission occurs 1 times
					rule OHscission occurs 1 times
					rule OHscission2 occurs 1 times
					rule CdoubleOFormation occurs 2 times
					rule CarbonMonoxideFormation occurs 1 times
					Max Ea is			93.9163
					C(CO)(CO)O.[{M}].[{M}]>>C(O_[{M}])(CO)CO_[{M}]	-36.8737	0
					C(O_[{M}])(CO)CO_[{M}].[{M}].[{M}]>>C(O_[{M}])(CO[{M}])CO_[{M}].[{M}H]	17.4241	68.9967
					C(O_[{M}])(CO[{M}])CO_[{M}].[{M}].[{M}]>>C(C(O_[{M}])CO_[{M}])(O[{M}])[{M}].[{M}H]	-58.3355	42.7348
					C(C(O_[{M}])CO_[{M}])(O[{M}])[{M}].[{M}].[{M}]>>C(C(O[{M}])CO_[{M}])(O[{M}])[{M}].[{M}].[{M}H]	46.4003	93.9163
					C(C(O[{M}])CO_[{M}])(O[{M}])[{M}]>>C(=O)(C(O[{M}])[{M}])CO_[{M}].[{M}H]	-27.2187	74.474
					C(=O)(C(O[{M}])[{M}])CO_[{M}]>>C(=O)(C(=O)CO_[{M}])[{M}].[{M}H]	-60.8387	40.1816
					C(=O)(C(=O)CO_[{M}])[{M}].[{M}].[{M}]>>C(=O)([{M}])[{M}].C(=O)(CO_[{M}])[{M}]	-119.788	74.2951
					C(=O)([{M}])[{M}]>>O=[C:].[{M}].[{M}]	102.221	0
					the above pathway is of length 8 and contains
					rule OHadsorption2 occurs 1 times
					rule CHscission occurs 1 times
					rule CCscission occurs 1 times
					rule OHscission occurs 1 times
					rule OHscission2 occurs 1 times
					rule CdoubleOFormation occurs 2 times
					rule CarbonMonoxideFormation occurs 1 times
					Max Ea is			93.9163
					C(CO)(CO)O.[{M}].[{M}]>>C(O_[{M}])(CO)CO_[{M}]	-36.8737	0
					C(O_[{M}])(CO)CO_[{M}].[{M}].[{M}]>>C(C(O_[{M}])CO_[{M}])([{M}])O.[{M}H]	-79.7489	20.8931
					C(C(O_[{M}])CO_[{M}])([{M}])O.[{M}].[{M}]>>C(C([{M}])O)(CO_[{M}])O[{M}].[{M}].[{M}H]	46.4003	93.9163
					C(C([{M}])O)(CO_[{M}])O[{M}].[{M}].[{M}]>>C(C(O[{M}])CO_[{M}])(O[{M}])[{M}].[{M}H]	38.8376	87.4123
					C(C(O[{M}])CO_[{M}])(O[{M}])[{M}]>>C(=O)(C(O[{M}])[{M}])CO_[{M}].[{M}H]	-27.2187	74.474
					C(=O)(C(O[{M}])[{M}])CO_[{M}]>>C(=O)(C(=O)CO_[{M}])[{M}].[{M}H]	-60.8387	40.1816
					C(=O)(C(=O)CO_[{M}])[{M}].[{M}].[{M}]>>C(=O)([{M}])[{M}].C(=O)(CO_[{M}])[{M}]	-119.788	74.2951
					C(=O)([{M}])[{M}]>>O=[C:].[{M}].[{M}]	102.221	0
					the above pathway is of length 8 and contains
					rule OHadsorption2 occurs 1 times
					rule CHscission occurs 1 times
					rule CCscission occurs 1 times
					rule OHscission occurs 1 times
					rule OHscission2 occurs 1 times
					rule CdoubleOFormation occurs 2 times
					rule CarbonMonoxideFormation occurs 1 times
					Max Ea is			93.9163
					C(CO)(CO)O.[{M}].[{M}]>>C(O_[{M}])(CO)CO_[{M}]	-36.8737	0
					C(O_[{M}])(CO)CO_[{M}].[{M}].[{M}]>>C(O[{M}])(CO_[{M}])CO_[{M}].[{M}H]	23.3108	74.0593
					C(O[{M}])(CO_[{M}])CO_[{M}].[{M}].[{M}]>>C(C([{M}])O)(CO_[{M}])O[{M}].[{M}].[{M}H]	-56.6594	44.4444
					C(C([{M}])O)(CO_[{M}])O[{M}].[{M}].[{M}]>>C(C(O[{M}])CO_[{M}])(O[{M}])[{M}].[{M}H]	38.8376	87.4123
					C(C(O[{M}])CO_[{M}])(O[{M}])[{M}]>>C(=O)(C(O[{M}])[{M}])CO_[{M}].[{M}H]	-27.2187	74.474
					C(=O)(C(O[{M}])[{M}])CO_[{M}]>>C(=O)(C(=O)CO_[{M}])[{M}].[{M}H]	-60.8387	40.1816
					C(=O)(C(=O)CO_[{M}])[{M}].[{M}].[{M}]>>C(=O)([{M}])[{M}].C(=O)(CO_[{M}])[{M}]	-119.788	74.2951
					C(=O)([{M}])[{M}]>>O=[C:].[{M}].[{M}]	102.221	0
					the above pathway is of length 8 and contains
					rule OHadsorption2 occurs 1 times
					rule CHscission2 occurs 1 times
					rule CCscission occurs 1 times
					rule OHscission occurs 1 times
					rule OHscission4 occurs 1 times
					rule CdoubleOFormation occurs 2 times
					rule CarbonMonoxideFormation occurs 1 times
					Max Ea is			87.4123
					C(CO)(CO)O.[{M}].[{M}]>>C(O_[{M}])(CO)CO_[{M}]	-36.8737	0
					C(O_[{M}])(CO)CO_[{M}].[{M}].[{M}]>>C(O_[{M}])(CO[{M}])CO_[{M}].[{M}H]	17.4241	68.9967
					C(O_[{M}])(CO[{M}])CO_[{M}].[{M}].[{M}]>>C(O[{M}])(CO[{M}])CO_[{M}].[{M}].[{M}H]	46.4003	93.9163
					C(O[{M}])(CO[{M}])CO_[{M}].[{M}].[{M}]>>C(C(O[{M}])CO_[{M}])(O[{M}])[{M}].[{M}H]	-58.3355	42.7348
					C(C(O[{M}])CO_[{M}])(O[{M}])[{M}]>>C(=O)(C(O[{M}])[{M}])CO_[{M}].[{M}H]	-27.2187	74.474
					C(=O)(C(O[{M}])[{M}])CO_[{M}]>>C(=O)(C(=O)CO_[{M}])[{M}].[{M}H]	-60.8387	40.1816
					C(=O)(C(=O)CO_[{M}])[{M}].[{M}].[{M}]>>C(=O)([{M}])[{M}].C(=O)(CO_[{M}])[{M}]	-119.788	74.2951
					C(=O)([{M}])[{M}]>>O=[C:].[{M}].[{M}]	102.221	0
					the above pathway is of length 8 and contains
					rule OHadsorption2 occurs 1 times
					rule CHscission occurs 1 times
					rule CCscission occurs 1 times
					rule OHscission occurs 1 times
					rule OHscission2 occurs 1 times
					rule CdoubleOFormation occurs 2 times
					rule CarbonMonoxideFormation occurs 1 times
					Max Ea is			93.9163
					C(CO)(CO)O.[{M}].[{M}]>>C(O_[{M}])(CO)CO_[{M}]	-36.8737	0
					C(O_[{M}])(CO)CO_[{M}].[{M}].[{M}]>>C(O[{M}])(CO_[{M}])CO_[{M}].[{M}H]	23.3108	74.0593
					C(O[{M}])(CO_[{M}])CO_[{M}].[{M}].[{M}]>>C(O[{M}])(CO[{M}])CO_[{M}].[{M}].[{M}H]	40.5136	88.8537
					C(O[{M}])(CO[{M}])CO_[{M}].[{M}].[{M}]>>C(C(O[{M}])CO_[{M}])(O[{M}])[{M}].[{M}H]	-58.3355	42.7348
					C(C(O[{M}])CO_[{M}])(O[{M}])[{M}]>>C(=O)(C(O[{M}])[{M}])CO_[{M}].[{M}H]	-27.2187	74.474
					C(=O)(C(O[{M}])[{M}])CO_[{M}]>>C(=O)(C(=O)CO_[{M}])[{M}].[{M}H]	-60.8387	40.1816
					C(=O)(C(=O)CO_[{M}])[{M}].[{M}].[{M}]>>C(=O)([{M}])[{M}].C(=O)(CO_[{M}])[{M}]	-119.788	74.2951
					C(=O)([{M}])[{M}]>>O=[C:].[{M}].[{M}]	102.221	0
					the above pathway is of length 8 and contains
					rule OHadsorption2 occurs 1 times
					rule CHscission occurs 1 times
					rule CCscission occurs 1 times
					rule OHscission2 occurs 1 times
					rule OHscission4 occurs 1 times
					rule CdoubleOFormation occurs 2 times
					rule CarbonMonoxideFormation occurs 1 times
					Max Ea is			88.8537
					C(CO)(CO)O.[{M}].[{M}]>>C(O_[{M}])(CO)CO_[{M}]	-36.8737	0
					C(O_[{M}])(CO)CO_[{M}].[{M}].[{M}]>>C(CO_[{M}])(CO_[{M}])([{M}])O.[{M}H]	-51.7113	49.4915
					C(CO_[{M}])(CO_[{M}])([{M}])O.[{M}].[{M}]>>C(O[{M}])(CO_[{M}])(CO_[{M}])[{M}].[{M}H]	38.8376	87.4123
					C(O[{M}])(CO_[{M}])(CO_[{M}])[{M}].[{M}].[{M}]>>C(O[{M}])(CO[{M}])(CO_[{M}])[{M}].[{M}].[{M}H]	40.5136	88.8537
					C(O[{M}])(CO[{M}])(CO_[{M}])[{M}].[{M}].[{M}]>>C(=O)(C(O[{M}])[{M}])CO_[{M}].[{M}].[{M}].[{M}H]	-49.3696	51.88
					C(=O)(C(O[{M}])[{M}])CO_[{M}]>>C(=O)(C(=O)CO_[{M}])[{M}].[{M}H]	-60.8387	40.1816
					C(=O)(C(=O)CO_[{M}])[{M}].[{M}].[{M}]>>C(=O)([{M}])[{M}].C(=O)(CO_[{M}])[{M}]	-119.788	74.2951
					C(=O)([{M}])[{M}]>>O=[C:].[{M}].[{M}]	102.221	0
					the above pathway is of length 8 and contains
					rule OHadsorption2 occurs 1 times
					rule CHscission3 occurs 1 times
					rule CHscission7 occurs 1 times
					rule CCscission occurs 1 times
					rule OHscission occurs 1 times
					rule OHscission2 occurs 1 times
					rule CdoubleOFormation occurs 1 times
					rule CarbonMonoxideFormation occurs 1 times
					Max Ea is			88.8537
					C(CO)(CO)O.[{M}].[{M}]>>C(O_[{M}])(CO)CO_[{M}]	-36.8737	0
					C(O_[{M}])(CO)CO_[{M}].[{M}].[{M}]>>C(O[{M}])(CO_[{M}])CO_[{M}].[{M}H]	23.3108	74.0593
					C(O[{M}])(CO_[{M}])CO_[{M}].[{M}].[{M}]>>C(O[{M}])(CO_[{M}])(CO_[{M}])[{M}].[{M}H]	-36.1845	65.3288
					C(O[{M}])(CO_[{M}])(CO_[{M}])[{M}].[{M}].[{M}]>>C(O[{M}])(CO[{M}])(CO_[{M}])[{M}].[{M}].[{M}H]	40.5136	88.8537
					C(O[{M}])(CO[{M}])(CO_[{M}])[{M}].[{M}].[{M}]>>C(=O)(C(O[{M}])[{M}])CO_[{M}].[{M}].[{M}].[{M}H]	-49.3696	51.88
					C(=O)(C(O[{M}])[{M}])CO_[{M}]>>C(=O)(C(=O)CO_[{M}])[{M}].[{M}H]	-60.8387	40.1816
					C(=O)(C(=O)CO_[{M}])[{M}].[{M}].[{M}]>>C(=O)([{M}])[{M}].C(=O)(CO_[{M}])[{M}]	-119.788	74.2951
					C(=O)([{M}])[{M}]>>O=[C:].[{M}].[{M}]	102.221	0
					the above pathway is of length 8 and contains
					rule OHadsorption2 occurs 1 times
					rule CHscission occurs 1 times
					rule CHscission3 occurs 1 times
					rule CCscission occurs 1 times
					rule OHscission2 occurs 1 times
					rule OHscission4 occurs 1 times
					rule CdoubleOFormation occurs 1 times
					rule CarbonMonoxideFormation occurs 1 times
					Max Ea is			88.8537
					C(CO)(CO)O.[{M}].[{M}]>>C(O_[{M}])(CO)CO_[{M}]	-36.8737	0
					C(O_[{M}])(CO)CO_[{M}].[{M}].[{M}]>>C(CO_[{M}])(CO_[{M}])([{M}])O.[{M}H]	-51.7113	49.4915
					C(CO_[{M}])(CO_[{M}])([{M}])O.[{M}].[{M}]>>C(CO[{M}])(CO_[{M}])([{M}])O.[{M}].[{M}H]	40.5136	88.8537
					C(CO[{M}])(CO_[{M}])([{M}])O.[{M}].[{M}]>>C(O[{M}])(CO[{M}])(CO_[{M}])[{M}].[{M}H]	38.8376	87.4123
					C(O[{M}])(CO[{M}])(CO_[{M}])[{M}].[{M}].[{M}]>>C(=O)(C(O[{M}])[{M}])CO_[{M}].[{M}].[{M}].[{M}H]	-49.3696	51.88
					C(=O)(C(O[{M}])[{M}])CO_[{M}]>>C(=O)(C(=O)CO_[{M}])[{M}].[{M}H]	-60.8387	40.1816
					C(=O)(C(=O)CO_[{M}])[{M}].[{M}].[{M}]>>C(=O)([{M}])[{M}].C(=O)(CO_[{M}])[{M}]	-119.788	74.2951
					C(=O)([{M}])[{M}]>>O=[C:].[{M}].[{M}]	102.221	0
					the above pathway is of length 8 and contains
					rule OHadsorption2 occurs 1 times
					rule CHscission3 occurs 1 times
					rule CHscission7 occurs 1 times
					rule CCscission occurs 1 times
					rule OHscission occurs 1 times
					rule OHscission2 occurs 1 times
					rule CdoubleOFormation occurs 1 times
					rule CarbonMonoxideFormation occurs 1 times
					Max Ea is			88.8537
					C(CO)(CO)O.[{M}].[{M}]>>C(O_[{M}])(CO)CO_[{M}]	-36.8737	0
					C(O_[{M}])(CO)CO_[{M}].[{M}].[{M}]>>C(O_[{M}])(CO[{M}])CO_[{M}].[{M}H]	17.4241	68.9967
					C(O_[{M}])(CO[{M}])CO_[{M}].[{M}].[{M}]>>C(CO[{M}])(CO_[{M}])([{M}])O.[{M}].[{M}H]	-28.6218	73.0428
					C(CO[{M}])(CO_[{M}])([{M}])O.[{M}].[{M}]>>C(O[{M}])(CO[{M}])(CO_[{M}])[{M}].[{M}H]	38.8376	87.4123
					C(O[{M}])(CO[{M}])(CO_[{M}])[{M}].[{M}].[{M}]>>C(=O)(C(O[{M}])[{M}])CO_[{M}].[{M}].[{M}].[{M}H]	-49.3696	51.88
					C(=O)(C(O[{M}])[{M}])CO_[{M}]>>C(=O)(C(=O)CO_[{M}])[{M}].[{M}H]	-60.8387	40.1816
					C(=O)(C(=O)CO_[{M}])[{M}].[{M}].[{M}]>>C(=O)([{M}])[{M}].C(=O)(CO_[{M}])[{M}]	-119.788	74.2951
					C(=O)([{M}])[{M}]>>O=[C:].[{M}].[{M}]	102.221	0
					the above pathway is of length 8 and contains
					rule OHadsorption2 occurs 1 times
					rule CHscission2 occurs 1 times
					rule CHscission3 occurs 1 times
					rule CCscission occurs 1 times
					rule OHscission occurs 2 times
					rule CdoubleOFormation occurs 1 times
					rule CarbonMonoxideFormation occurs 1 times
					Max Ea is			87.4123
					C(CO)(CO)O.[{M}].[{M}]>>C(O_[{M}])(CO)CO_[{M}]	-36.8737	0
					C(O_[{M}])(CO)CO_[{M}].[{M}].[{M}]>>C(O_[{M}])(CO[{M}])CO_[{M}].[{M}H]	17.4241	68.9967
					C(O_[{M}])(CO[{M}])CO_[{M}].[{M}].[{M}]>>C(O[{M}])(CO[{M}])CO_[{M}].[{M}].[{M}H]	46.4003	93.9163
					C(O[{M}])(CO[{M}])CO_[{M}].[{M}].[{M}]>>C(O[{M}])(CO[{M}])(CO_[{M}])[{M}].[{M}H]	-36.1845	65.3288
					C(O[{M}])(CO[{M}])(CO_[{M}])[{M}].[{M}].[{M}]>>C(=O)(C(O[{M}])[{M}])CO_[{M}].[{M}].[{M}].[{M}H]	-49.3696	51.88
					C(=O)(C(O[{M}])[{M}])CO_[{M}]>>C(=O)(C(=O)CO_[{M}])[{M}].[{M}H]	-60.8387	40.1816
					C(=O)(C(=O)CO_[{M}])[{M}].[{M}].[{M}]>>C(=O)([{M}])[{M}].C(=O)(CO_[{M}])[{M}]	-119.788	74.2951
					C(=O)([{M}])[{M}]>>O=[C:].[{M}].[{M}]	102.221	0
					the above pathway is of length 8 and contains
					rule OHadsorption2 occurs 1 times
					rule CHscission occurs 1 times
					rule CHscission3 occurs 1 times
					rule CCscission occurs 1 times
					rule OHscission occurs 1 times
					rule OHscission2 occurs 1 times
					rule CdoubleOFormation occurs 1 times
					rule CarbonMonoxideFormation occurs 1 times
					Max Ea is			93.9163
					C(CO)(CO)O.[{M}].[{M}]>>C(O_[{M}])(CO)CO_[{M}]	-36.8737	0
					C(O_[{M}])(CO)CO_[{M}].[{M}].[{M}]>>C(O[{M}])(CO_[{M}])CO_[{M}].[{M}H]	23.3108	74.0593
					C(O[{M}])(CO_[{M}])CO_[{M}].[{M}].[{M}]>>C(O[{M}])(CO[{M}])CO_[{M}].[{M}].[{M}H]	40.5136	88.8537
					C(O[{M}])(CO[{M}])CO_[{M}].[{M}].[{M}]>>C(O[{M}])(CO[{M}])(CO_[{M}])[{M}].[{M}H]	-36.1845	65.3288
					C(O[{M}])(CO[{M}])(CO_[{M}])[{M}].[{M}].[{M}]>>C(=O)(C(O[{M}])[{M}])CO_[{M}].[{M}].[{M}].[{M}H]	-49.3696	51.88
					C(=O)(C(O[{M}])[{M}])CO_[{M}]>>C(=O)(C(=O)CO_[{M}])[{M}].[{M}H]	-60.8387	40.1816
					C(=O)(C(=O)CO_[{M}])[{M}].[{M}].[{M}]>>C(=O)([{M}])[{M}].C(=O)(CO_[{M}])[{M}]	-119.788	74.2951
					C(=O)([{M}])[{M}]>>O=[C:].[{M}].[{M}]	102.221	0
					the above pathway is of length 8 and contains
					rule OHadsorption2 occurs 1 times
					rule CHscission occurs 1 times
					rule CHscission3 occurs 1 times
					rule CCscission occurs 1 times
					rule OHscission2 occurs 1 times
					rule OHscission4 occurs 1 times
					rule CdoubleOFormation occurs 1 times
					rule CarbonMonoxideFormation occurs 1 times
					Max Ea is			88.8537
					total valid pathways is 100
					total distinct pathways is 100
					2 pathways from C(CO)(CO)O containing
					1of rule OHadsorption2
					1of rule CHscission
					1of rule CHscission3
					1of rule CCscission
					1of rule OHscission
					1of rule OHscission2
					1of rule CdoubleOFormation
					1of rule CarbonMonoxideFormation
					1 pathways from C(CO)(CO)O containing
					1of rule OHadsorption2
					1of rule CHscission2
					1of rule CHscission7
					1of rule CCscission
					1of rule OHscission
					1of rule CdoubleOFormation
					1of rule CdoubleOFromCOH
					1of rule CarbonMonoxideFormation
					1 pathways from C(CO)(CO)O containing
					1of rule OHadsorption2
					1of rule CHscission4
					1of rule CHscission5
					1of rule CHscission7
					1of rule CCscission
					2of rule OHscission
					1of rule CarbonMonoxideFormation
					1 pathways from C(CO)(CO)O containing
					1of rule OHadsorption2
					1of rule CHscission5
					1of rule CHscission7
					1of rule CCscission
					2of rule OHscission
					1of rule CdoubleOFormation
					1of rule CarbonMonoxideFormation
					1 pathways from C(CO)(CO)O containing
					1of rule OHadsorption2
					1of rule CHscission2
					1of rule CHscission4
					1of rule CHscission7
					1of rule CCscission
					1of rule OHscission
					1of rule CdoubleOFromCOH
					1of rule CarbonMonoxideFormation
					1 pathways from C(CO)(CO)O containing
					1of rule OHadsorption2
					1of rule CHscission
					1of rule CHscission3
					1of rule CHscission4
					1of rule CCscission
					1of rule OHscission
					1of rule OHscission2
					1of rule CarbonMonoxideFormation
					1 pathways from C(CO)(CO)O containing
					1of rule OHadsorption2
					1of rule CHscission
					1of rule CHscission7
					1of rule CCscission
					1of rule OHscission2
					1of rule CdoubleOFormation
					1of rule CdoubleOFromCOH
					1of rule CarbonMonoxideFormation
					2 pathways from C(CO)(CO)O containing
					1of rule OHadsorption2
					1of rule CHscission3
					1of rule CHscission4
					1of rule CHscission7
					1of rule CCscission
					1of rule OHscission
					1of rule OHscission2
					1of rule CarbonMonoxideFormation
					4 pathways from C(CO)(CO)O containing
					1of rule OHadsorption2
					1of rule CHscission
					1of rule CHscission2
					1of rule CHscission7
					1of rule CCscission
					2of rule CdoubleOFromCOH
					1of rule CarbonMonoxideFormation
					1 pathways from C(CO)(CO)O containing
					1of rule OHadsorption2
					2of rule CHscission
					1of rule CHscission5
					1of rule CCscission
					1of rule OHscission4
					1of rule CdoubleOFromCOH
					1of rule CarbonMonoxideFormation
					3 pathways from C(CO)(CO)O containing
					1of rule OHadsorption2
					1of rule CHscission2
					1of rule CCscission
					1of rule OHscission
					1of rule OHscission4
					2of rule CdoubleOFormation
					1of rule CarbonMonoxideFormation
					2 pathways from C(CO)(CO)O containing
					1of rule OHadsorption2
					1of rule CHscission
					1of rule CHscission3
					1of rule CHscission4
					1of rule CCscission
					1of rule OHscission2
					1of rule OHscission4
					1of rule CarbonMonoxideFormation
					1 pathways from C(CO)(CO)O containing
					1of rule OHadsorption2
					1of rule CHscission2
					1of rule CHscission3
					1of rule CHscission4
					1of rule CCscission
					2of rule OHscission
					1of rule CarbonMonoxideFormation
					4 pathways from C(CO)(CO)O containing
					1of rule OHadsorption2
					1of rule CHscission
					1of rule CHscission3
					1of rule CCscission
					1of rule OHscission2
					1of rule OHscission4
					1of rule CdoubleOFormation
					1of rule CarbonMonoxideFormation
					3 pathways from C(CO)(CO)O containing
					1of rule OHadsorption2
					1of rule CHscission
					1of rule CHscission2
					1of rule CHscission4
					1of rule CCscission
					1of rule OHscission
					1of rule CdoubleOFromCOH
					1of rule CarbonMonoxideFormation
					4 pathways from C(CO)(CO)O containing
					1of rule OHadsorption2
					1of rule CHscission
					1of rule CHscission2
					1of rule CCscission
					1of rule OHscission
					1of rule CdoubleOFormation
					1of rule CdoubleOFromCOH
					1of rule CarbonMonoxideFormation
					2 pathways from C(CO)(CO)O containing
					1of rule OHadsorption2
					1of rule CHscission
					1of rule CHscission4
					1of rule CCscission
					1of rule OHscission2
					1of rule OHscission4
					1of rule CdoubleOFormation
					1of rule CarbonMonoxideFormation
					3 pathways from C(CO)(CO)O containing
					1of rule OHadsorption2
					1of rule CHscission
					1of rule CHscission2
					1of rule CCscission
					1of rule OHscission4
					1of rule CdoubleOFormation
					1of rule CdoubleOFromCOH
					1of rule CarbonMonoxideFormation
					2 pathways from C(CO)(CO)O containing
					1of rule OHadsorption2
					2of rule CHscission
					1of rule CHscission5
					1of rule CCscission
					1of rule OHscission
					1of rule CdoubleOFromCOH
					1of rule CarbonMonoxideFormation
					1 pathways from C(CO)(CO)O containing
					1of rule OHadsorption2
					1of rule CHscission
					2of rule CHscission3
					1of rule CCscission
					1of rule OHscission2
					1of rule OHscission4
					1of rule CarbonMonoxideFormation
					2 pathways from C(CO)(CO)O containing
					1of rule OHadsorption2
					1of rule CHscission
					1of rule CCscission
					1of rule OHscission2
					1of rule OHscission4
					2of rule CdoubleOFormation
					1of rule CarbonMonoxideFormation
[truncated: 129 more rows]

## Sheet: Pd
This is the output from RING for pathways query. All reactions in a pathway are given together and all pathways are given one below the other. The second column is the enthalpy of reaction, and the third column is the activation barriers. The Max Ea in the pathway is given in the fourth
Results on Pd at 550K
Propane diol					Carbon Monoxide
molecule C(CO)(O)C satisfies constraints					molecule O=[C:] satisfies constraints
shortest path to the molecule is 4					shortest path to the molecule is 5
Pathways for C(CO)(O)C					Pathways for O=[C:]
C(CO)(CO)O.[{M}].[{M}]>>C(O_[{M}])(CO)CO_[{M}]	-34.9437	0			C(CO)(CO)O.[{M}].[{M}]>>C(O_[{M}])(CO)CO_[{M}]	-34.9437	0
C(O_[{M}])(CO)CO_[{M}].[{M}].[{M}]>>C(O_[{M}])(C[{M}])CO_[{M}].[{M}]O	9.32679	144.359			C(O_[{M}])(CO)CO_[{M}].[{M}].[{M}]>>C(C(O_[{M}])CO_[{M}])([{M}])O.[{M}H]	-86.2239	14.2886
C(O_[{M}])(C[{M}])CO_[{M}].[{M}H]>>C(O_[{M}])(CO_[{M}])C.[{M}].[{M}]	35.6979	84.7122			C(C(O_[{M}])CO_[{M}])([{M}])O.[{M}].[{M}]>>C(C(O_[{M}])CO_[{M}])([{M}])([{M}])O.[{M}H]	-26.883	74.8163
C(O_[{M}])(CO_[{M}])C>>C(CO)(O)C.[{M}].[{M}]	36.1986	0			C(C(O_[{M}])CO_[{M}])([{M}])([{M}])O.[{M}].[{M}]>>C(C(CO_[{M}])([{M}])O)([{M}])([{M}])O.[{M}].[{M}H]	-6.0009	96.1161
					C(C(CO_[{M}])([{M}])O)([{M}])([{M}])O>>C(C(=O)CO_[{M}])([{M}])([{M}])O.[{M}H]	-20.0826	36.741
the above pathway is of length 4 and contains					C(C(=O)CO_[{M}])([{M}])([{M}])O>>C(=O)(C(=O)CO_[{M}])[{M}].[{M}H]	-12.418	43.3326
rule OHadsorption2 occurs 1 times					C(=O)(C(=O)CO_[{M}])[{M}].[{M}].[{M}]>>C(=O)([{M}])[{M}].C(=O)(CO_[{M}])[{M}]	-101.938	86.0761
rule OHdesorption2 occurs 1 times					C(=O)([{M}])[{M}]>>O=[C:].[{M}].[{M}]	84.3706	0
rule CHformation occurs 1 times
rule COScission occurs 1 times					the above pathway is of length 8 and contains
Max Ea is			144.359		rule OHadsorption2 occurs 1 times
					rule CHscission occurs 2 times
C(CO)(CO)O.[{M}].[{M}]>>C(O_[{M}])(CO)CO_[{M}]	-34.9437	0			rule CHscission2 occurs 1 times
C(O_[{M}])(CO)CO_[{M}].[{M}].[{M}]>>C(O_[{M}])(CO[{M}])CO_[{M}].[{M}H]	6.84912	59.9022			rule CCscission occurs 1 times
C(O_[{M}])(CO[{M}])CO_[{M}].[{M}].[{M}]>>C(O_[{M}])(C[{M}])CO_[{M}].O([{M}])[{M}]	-15.6414	167.223			rule CdoubleOFromCOH occurs 2 times
C(O_[{M}])(C[{M}])CO_[{M}].[{M}H]>>C(O_[{M}])(CO_[{M}])C.[{M}].[{M}]	35.6979	84.7122			rule CarbonMonoxideFormation occurs 1 times
C(O_[{M}])(CO_[{M}])C>>C(CO)(O)C.[{M}].[{M}]	36.1986	0			Max Ea is			96.1161
the above pathway is of length 5 and contains					C(CO)(CO)O.[{M}].[{M}]>>C(O_[{M}])(CO)CO_[{M}]	-34.9437	0
rule OHadsorption2 occurs 1 times					C(O_[{M}])(CO)CO_[{M}].[{M}].[{M}]>>C(C(O_[{M}])CO_[{M}])([{M}])O.[{M}H]	-86.2239	14.2886
rule OHdesorption2 occurs 1 times					C(C(O_[{M}])CO_[{M}])([{M}])O.[{M}].[{M}]>>C(C([{M}])O)(CO_[{M}])([{M}])O.[{M}].[{M}H]	-14.6484	87.2957
rule OHscission occurs 1 times					C(C([{M}])O)(CO_[{M}])([{M}])O.[{M}].[{M}]>>C(C(CO_[{M}])([{M}])O)([{M}])([{M}])O.[{M}H]	-18.2355	83.6367
rule CHformation occurs 1 times					C(C(CO_[{M}])([{M}])O)([{M}])([{M}])O>>C(C(=O)CO_[{M}])([{M}])([{M}])O.[{M}H]	-20.0826	36.741
rule COScission occurs 1 times					C(C(=O)CO_[{M}])([{M}])([{M}])O>>C(=O)(C(=O)CO_[{M}])[{M}].[{M}H]	-12.418	43.3326
Max Ea is			167.223		C(=O)(C(=O)CO_[{M}])[{M}].[{M}].[{M}]>>C(=O)([{M}])[{M}].C(=O)(CO_[{M}])[{M}]	-101.938	86.0761
					C(=O)([{M}])[{M}]>>O=[C:].[{M}].[{M}]	84.3706	0
C(CO)(CO)O.[{M}].[{M}]>>C(O_[{M}])(CO)CO_[{M}]	-34.9437	0
C(O_[{M}])(CO)CO_[{M}].[{M}].[{M}]>>C(C(O_[{M}])CO_[{M}])([{M}])O.[{M}H]	-86.2239	14.2886			the above pathway is of length 8 and contains
C(C(O_[{M}])CO_[{M}])([{M}])O.[{M}].[{M}]>>C(C(O_[{M}])CO_[{M}])(O[{M}])[{M}].[{M}H]	28.2626	78.3178			rule OHadsorption2 occurs 1 times
C(C(O_[{M}])CO_[{M}])(O[{M}])[{M}].[{M}H]>>C(O_[{M}])(CO[{M}])CO_[{M}].[{M}].[{M}]	64.8105	109.749			rule CHscission occurs 2 times
C(O_[{M}])(CO[{M}])CO_[{M}].[{M}].[{M}]>>C(O_[{M}])(C[{M}])CO_[{M}].O([{M}])[{M}]	-15.6414	167.223			rule CHscission2 occurs 1 times
C(O_[{M}])(C[{M}])CO_[{M}].[{M}H]>>C(O_[{M}])(CO_[{M}])C.[{M}].[{M}]	35.6979	84.7122			rule CCscission occurs 1 times
C(O_[{M}])(CO_[{M}])C>>C(CO)(O)C.[{M}].[{M}]	36.1986	0			rule CdoubleOFromCOH occurs 2 times
					rule CarbonMonoxideFormation occurs 1 times
the above pathway is of length 7 and contains					Max Ea is			87.2957
rule OHadsorption2 occurs 1 times
rule OHdesorption2 occurs 1 times					C(CO)(CO)O.[{M}].[{M}]>>C(O_[{M}])(CO)CO_[{M}]	-34.9437	0
rule CHscission occurs 1 times					C(O_[{M}])(CO)CO_[{M}].[{M}].[{M}]>>C(CO_[{M}])(CO_[{M}])([{M}])O.[{M}H]	-58.1863	42.887
rule OHscission occurs 1 times					C(CO_[{M}])(CO_[{M}])([{M}])O.[{M}].[{M}]>>C(C([{M}])O)(CO_[{M}])([{M}])O.[{M}].[{M}H]	-42.686	58.6973
rule CHformation occurs 2 times					C(C([{M}])O)(CO_[{M}])([{M}])O.[{M}].[{M}]>>C(C(CO_[{M}])([{M}])O)([{M}])([{M}])O.[{M}H]	-18.2355	83.6367
rule COScission occurs 1 times					C(C(CO_[{M}])([{M}])O)([{M}])([{M}])O>>C(C(=O)CO_[{M}])([{M}])([{M}])O.[{M}H]	-20.0826	36.741
Max Ea is			167.223		C(C(=O)CO_[{M}])([{M}])([{M}])O>>C(=O)(C(=O)CO_[{M}])[{M}].[{M}H]	-12.418	43.3326
					C(=O)(C(=O)CO_[{M}])[{M}].[{M}].[{M}]>>C(=O)([{M}])[{M}].C(=O)(CO_[{M}])[{M}]	-101.938	86.0761
C(CO)(CO)O.[{M}].[{M}]>>C(O_[{M}])(CO)CO_[{M}]	-34.9437	0			C(=O)([{M}])[{M}]>>O=[C:].[{M}].[{M}]	84.3706	0
C(O_[{M}])(CO)CO_[{M}].[{M}].[{M}]>>C(C(O_[{M}])CO_[{M}])([{M}])O.[{M}H]	-86.2239	14.2886
C(C(O_[{M}])CO_[{M}])([{M}])O.[{M}].[{M}]>>C(C([{M}])O)(CO[{M}])O_[{M}].[{M}].[{M}H]	28.9736	78.9293			the above pathway is of length 8 and contains
C(C([{M}])O)(CO[{M}])O_[{M}].[{M}H]>>C(O_[{M}])(CO[{M}])CO_[{M}].[{M}]	64.0994	103.519			rule OHadsorption2 occurs 1 times
C(O_[{M}])(CO[{M}])CO_[{M}].[{M}].[{M}]>>C(O_[{M}])(C[{M}])CO_[{M}].O([{M}])[{M}]	-15.6414	167.223			rule CHscission occurs 1 times
C(O_[{M}])(C[{M}])CO_[{M}].[{M}H]>>C(O_[{M}])(CO_[{M}])C.[{M}].[{M}]	35.6979	84.7122			rule CHscission2 occurs 1 times
C(O_[{M}])(CO_[{M}])C>>C(CO)(O)C.[{M}].[{M}]	36.1986	0			rule CHscission7 occurs 1 times
					rule CCscission occurs 1 times
the above pathway is of length 7 and contains					rule CdoubleOFromCOH occurs 2 times
rule OHadsorption2 occurs 1 times					rule CarbonMonoxideFormation occurs 1 times
rule OHdesorption2 occurs 1 times					Max Ea is			86.0761
rule CHscission occurs 1 times
rule OHscission2 occurs 1 times					C(CO)(CO)O.[{M}].[{M}]>>C(O_[{M}])(CO)CO_[{M}]	-34.9437	0
rule CHformation occurs 1 times					C(O_[{M}])(CO)CO_[{M}].[{M}].[{M}]>>C(C(O_[{M}])CO_[{M}])([{M}])O.[{M}H]	-86.2239	14.2886
rule CHformation2 occurs 1 times					C(C(O_[{M}])CO_[{M}])([{M}])O.[{M}].[{M}]>>C(C(O_[{M}])CO_[{M}])([{M}])([{M}])O.[{M}H]	-26.883	74.8163
rule COScission occurs 1 times					C(C(O_[{M}])CO_[{M}])([{M}])([{M}])O.[{M}].[{M}]>>C(C(O[{M}])CO_[{M}])([{M}])([{M}])O.[{M}].[{M}H]	34.8603	83.9919
Max Ea is			167.223		C(C(O[{M}])CO_[{M}])([{M}])([{M}])O>>C(C(=O)CO_[{M}])([{M}])([{M}])O.[{M}H]	-60.9438	40.0743
					C(C(=O)CO_[{M}])([{M}])([{M}])O>>C(=O)(C(=O)CO_[{M}])[{M}].[{M}H]	-12.418	43.3326
C(CO)(CO)O.[{M}].[{M}]>>C(O_[{M}])(CO)CO_[{M}]	-34.9437	0			C(=O)(C(=O)CO_[{M}])[{M}].[{M}].[{M}]>>C(=O)([{M}])[{M}].C(=O)(CO_[{M}])[{M}]	-101.938	86.0761
C(O_[{M}])(CO)CO_[{M}].[{M}].[{M}]>>C(CO_[{M}])(CO_[{M}])([{M}])O.[{M}H]	-58.1863	42.887			C(=O)([{M}])[{M}]>>O=[C:].[{M}].[{M}]	84.3706	0
C(CO_[{M}])(CO_[{M}])([{M}])O.[{M}].[{M}]>>C(CO[{M}])(CO_[{M}])([{M}])O.[{M}].[{M}H]	28.9736	78.9293
C(CO[{M}])(CO_[{M}])([{M}])O.[{M}H]>>C(O_[{M}])(CO[{M}])CO_[{M}].[{M}]	36.0618	102.958			the above pathway is of length 8 and contains
C(O_[{M}])(CO[{M}])CO_[{M}].[{M}].[{M}]>>C(O_[{M}])(C[{M}])CO_[{M}].O([{M}])[{M}]	-15.6414	167.223			rule OHadsorption2 occurs 1 times
C(O_[{M}])(C[{M}])CO_[{M}].[{M}H]>>C(O_[{M}])(CO_[{M}])C.[{M}].[{M}]	35.6979	84.7122			rule CHscission occurs 2 times
C(O_[{M}])(CO_[{M}])C>>C(CO)(O)C.[{M}].[{M}]	36.1986	0			rule CCscission occurs 1 times
					rule OHscission2 occurs 1 times
the above pathway is of length 7 and contains					rule CdoubleOFormation occurs 1 times
rule OHadsorption2 occurs 1 times					rule CdoubleOFromCOH occurs 1 times
rule OHdesorption2 occurs 1 times					rule CarbonMonoxideFormation occurs 1 times
rule CHscission7 occurs 1 times					Max Ea is			86.0761
rule OHscission2 occurs 1 times
rule CHformation occurs 1 times					C(CO)(CO)O.[{M}].[{M}]>>C(O_[{M}])(CO)CO_[{M}]	-34.9437	0
rule CHformation2 occurs 1 times					C(O_[{M}])(CO)CO_[{M}].[{M}].[{M}]>>C(C(O_[{M}])CO_[{M}])([{M}])O.[{M}H]	-86.2239	14.2886
rule COScission occurs 1 times					C(C(O_[{M}])CO_[{M}])([{M}])O.[{M}].[{M}]>>C(C([{M}])O)(CO_[{M}])O[{M}].[{M}].[{M}H]	34.8603	83.9919
Max Ea is			167.223		C(C([{M}])O)(CO_[{M}])O[{M}].[{M}].[{M}]>>C(C(O[{M}])CO_[{M}])([{M}])([{M}])O.[{M}H]	-26.883	74.8163
					C(C(O[{M}])CO_[{M}])([{M}])([{M}])O>>C(C(=O)CO_[{M}])([{M}])([{M}])O.[{M}H]	-60.9438	40.0743
C(CO)(CO)O.[{M}].[{M}]>>C(O_[{M}])(CO)CO_[{M}]	-34.9437	0			C(C(=O)CO_[{M}])([{M}])([{M}])O>>C(=O)(C(=O)CO_[{M}])[{M}].[{M}H]	-12.418	43.3326
C(O_[{M}])(CO)CO_[{M}].[{M}].[{M}]>>C(O[{M}])(CO_[{M}])CO_[{M}].[{M}H]	12.7358	64.9648			C(=O)(C(=O)CO_[{M}])[{M}].[{M}].[{M}]>>C(=O)([{M}])[{M}].C(=O)(CO_[{M}])[{M}]	-101.938	86.0761
C(O[{M}])(CO_[{M}])CO_[{M}].[{M}].[{M}]>>C(O[{M}])(CO[{M}])CO_[{M}].[{M}].[{M}H]	28.9736	78.9293			C(=O)([{M}])[{M}]>>O=[C:].[{M}].[{M}]	84.3706	0
C(O[{M}])(CO[{M}])CO_[{M}].[{M}H]>>C(O_[{M}])(CO[{M}])CO_[{M}].[{M}]	-34.8603	58.8924
C(O_[{M}])(CO[{M}])CO_[{M}].[{M}].[{M}]>>C(O_[{M}])(C[{M}])CO_[{M}].O([{M}])[{M}]	-15.6414	167.223			the above pathway is of length 8 and contains
C(O_[{M}])(C[{M}])CO_[{M}].[{M}H]>>C(O_[{M}])(CO_[{M}])C.[{M}].[{M}]	35.6979	84.7122			rule OHadsorption2 occurs 1 times
C(O_[{M}])(CO_[{M}])C>>C(CO)(O)C.[{M}].[{M}]	36.1986	0			rule CHscission occurs 2 times
					rule CCscission occurs 1 times
the above pathway is of length 7 and contains					rule OHscission2 occurs 1 times
rule OHadsorption2 occurs 1 times					rule CdoubleOFormation occurs 1 times
rule OHdesorption2 occurs 1 times					rule CdoubleOFromCOH occurs 1 times
rule OHscission2 occurs 1 times					rule CarbonMonoxideFormation occurs 1 times
rule OHscission4 occurs 1 times					Max Ea is			86.0761
rule CHformation occurs 1 times
rule OHformation2 occurs 1 times					C(CO)(CO)O.[{M}].[{M}]>>C(O_[{M}])(CO)CO_[{M}]	-34.9437	0
rule COScission occurs 1 times					C(O_[{M}])(CO)CO_[{M}].[{M}].[{M}]>>C(O[{M}])(CO_[{M}])CO_[{M}].[{M}H]	12.7358	64.9648
Max Ea is			167.223		C(O[{M}])(CO_[{M}])CO_[{M}].[{M}].[{M}]>>C(C([{M}])O)(CO_[{M}])O[{M}].[{M}].[{M}H]	-64.0994	36.8556
					C(C([{M}])O)(CO_[{M}])O[{M}].[{M}].[{M}]>>C(C(O[{M}])CO_[{M}])([{M}])([{M}])O.[{M}H]	-26.883	74.8163
C(CO)(CO)O.[{M}].[{M}]>>C(O_[{M}])(CO)CO_[{M}]	-34.9437	0			C(C(O[{M}])CO_[{M}])([{M}])([{M}])O>>C(C(=O)CO_[{M}])([{M}])([{M}])O.[{M}H]	-60.9438	40.0743
C(O_[{M}])(CO)CO_[{M}].[{M}].[{M}]>>C(C(O_[{M}])CO_[{M}])([{M}])O.[{M}H]	-86.2239	14.2886			C(C(=O)CO_[{M}])([{M}])([{M}])O>>C(=O)(C(=O)CO_[{M}])[{M}].[{M}H]	-12.418	43.3326
C(C(O_[{M}])CO_[{M}])([{M}])O.[{M}].[{M}]>>C(C([{M}])O)(O_[{M}])C[{M}].[{M}]O.[{M}]	31.4513	159.625			C(=O)(C(=O)CO_[{M}])[{M}].[{M}].[{M}]>>C(=O)([{M}])[{M}].C(=O)(CO_[{M}])[{M}]	-101.938	86.0761
C(C([{M}])O)(O_[{M}])C[{M}].[{M}H]>>C(O_[{M}])(C[{M}])CO_[{M}].[{M}]	64.0994	103.519			C(=O)([{M}])[{M}]>>O=[C:].[{M}].[{M}]	84.3706	0
C(O_[{M}])(C[{M}])CO_[{M}].[{M}H]>>C(O_[{M}])(CO_[{M}])C.[{M}].[{M}]	35.6979	84.7122
C(O_[{M}])(CO_[{M}])C>>C(CO)(O)C.[{M}].[{M}]	36.1986	0			the above pathway is of length 8 and contains
					rule OHadsorption2 occurs 1 times
the above pathway is of length 6 and contains					rule CHscission occurs 1 times
rule OHadsorption2 occurs 1 times					rule CHscission2 occurs 1 times
rule OHdesorption2 occurs 1 times					rule CCscission occurs 1 times
rule CHscission occurs 1 times					rule OHscission4 occurs 1 times
rule CHformation occurs 1 times					rule CdoubleOFormation occurs 1 times
rule CHformation2 occurs 1 times					rule CdoubleOFromCOH occurs 1 times
rule COScission2 occurs 1 times					rule CarbonMonoxideFormation occurs 1 times
Max Ea is			159.625		Max Ea is			86.0761
C(CO)(CO)O.[{M}].[{M}]>>C(O_[{M}])(CO)CO_[{M}]	-34.9437	0			C(CO)(CO)O.[{M}].[{M}]>>C(O_[{M}])(CO)CO_[{M}]	-34.9437	0
C(O_[{M}])(CO)CO_[{M}].[{M}].[{M}]>>C(C(O_[{M}])CO_[{M}])([{M}])O.[{M}H]	-86.2239	14.2886			C(O_[{M}])(CO)CO_[{M}].[{M}].[{M}]>>C(C(O_[{M}])CO_[{M}])([{M}])O.[{M}H]	-86.2239	14.2886
C(C(O_[{M}])CO_[{M}])([{M}])O.[{M}].[{M}]>>C(C([{M}])O)(CO[{M}])O_[{M}].[{M}].[{M}H]	28.9736	78.9293			C(C(O_[{M}])CO_[{M}])([{M}])O.[{M}].[{M}]>>C(C([{M}])O)(CO_[{M}])([{M}])O.[{M}].[{M}H]	-14.6484	87.2957
C(C([{M}])O)(CO[{M}])O_[{M}].[{M}].[{M}]>>C(C([{M}])O)(O_[{M}])C[{M}].O([{M}])[{M}]	-15.6414	167.223			C(C([{M}])O)(CO_[{M}])([{M}])O>>C(=O)(C([{M}])O)CO_[{M}].[{M}H]	2.06501	55.7879
C(C([{M}])O)(O_[{M}])C[{M}].[{M}H]>>C(O_[{M}])(C[{M}])CO_[{M}].[{M}]	64.0994	103.519			C(=O)(C([{M}])O)CO_[{M}].[{M}].[{M}]>>C(C(=O)CO_[{M}])([{M}])([{M}])O.[{M}H]	-40.3832	61.0462
C(O_[{M}])(C[{M}])CO_[{M}].[{M}H]>>C(O_[{M}])(CO_[{M}])C.[{M}].[{M}]	35.6979	84.7122			C(C(=O)CO_[{M}])([{M}])([{M}])O>>C(=O)(C(=O)CO_[{M}])[{M}].[{M}H]	-12.418	43.3326
C(O_[{M}])(CO_[{M}])C>>C(CO)(O)C.[{M}].[{M}]	36.1986	0			C(=O)(C(=O)CO_[{M}])[{M}].[{M}].[{M}]>>C(=O)([{M}])[{M}].C(=O)(CO_[{M}])[{M}]	-101.938	86.0761
					C(=O)([{M}])[{M}]>>O=[C:].[{M}].[{M}]	84.3706	0
the above pathway is of length 7 and contains
rule OHadsorption2 occurs 1 times					the above pathway is of length 8 and contains
rule OHdesorption2 occurs 1 times					rule OHadsorption2 occurs 1 times
rule CHscission occurs 1 times					rule CHscission occurs 2 times
rule OHscission2 occurs 1 times					rule CHscission2 occurs 1 times
rule CHformation occurs 1 times					rule CCscission occurs 1 times
rule CHformation2 occurs 1 times					rule CdoubleOFromCOH occurs 2 times
rule COScission occurs 1 times					rule CarbonMonoxideFormation occurs 1 times
Max Ea is			167.223		Max Ea is			87.2957
C(CO)(CO)O.[{M}].[{M}]>>C(O_[{M}])(CO)CO_[{M}]	-34.9437	0			C(CO)(CO)O.[{M}].[{M}]>>C(O_[{M}])(CO)CO_[{M}]	-34.9437	0
C(O_[{M}])(CO)CO_[{M}].[{M}].[{M}]>>C(O_[{M}])(CO[{M}])CO_[{M}].[{M}H]	6.84912	59.9022			C(O_[{M}])(CO)CO_[{M}].[{M}].[{M}]>>C(CO_[{M}])(CO_[{M}])([{M}])O.[{M}H]	-58.1863	42.887
C(O_[{M}])(CO[{M}])CO_[{M}].[{M}].[{M}]>>C(C([{M}])O)(CO[{M}])O_[{M}].[{M}].[{M}H]	-64.0994	36.8556			C(CO_[{M}])(CO_[{M}])([{M}])O.[{M}].[{M}]>>C(C([{M}])O)(CO_[{M}])([{M}])O.[{M}].[{M}H]	-42.686	58.6973
C(C([{M}])O)(CO[{M}])O_[{M}].[{M}].[{M}]>>C(C([{M}])O)(O_[{M}])C[{M}].O([{M}])[{M}]	-15.6414	167.223			C(C([{M}])O)(CO_[{M}])([{M}])O>>C(=O)(C([{M}])O)CO_[{M}].[{M}H]	2.06501	55.7879
C(C([{M}])O)(O_[{M}])C[{M}].[{M}H]>>C(O_[{M}])(C[{M}])CO_[{M}].[{M}]	64.0994	103.519			C(=O)(C([{M}])O)CO_[{M}].[{M}].[{M}]>>C(C(=O)CO_[{M}])([{M}])([{M}])O.[{M}H]	-40.3832	61.0462
C(O_[{M}])(C[{M}])CO_[{M}].[{M}H]>>C(O_[{M}])(CO_[{M}])C.[{M}].[{M}]	35.6979	84.7122			C(C(=O)CO_[{M}])([{M}])([{M}])O>>C(=O)(C(=O)CO_[{M}])[{M}].[{M}H]	-12.418	43.3326
C(O_[{M}])(CO_[{M}])C>>C(CO)(O)C.[{M}].[{M}]	36.1986	0			C(=O)(C(=O)CO_[{M}])[{M}].[{M}].[{M}]>>C(=O)([{M}])[{M}].C(=O)(CO_[{M}])[{M}]	-101.938	86.0761
					C(=O)([{M}])[{M}]>>O=[C:].[{M}].[{M}]	84.3706	0
the above pathway is of length 7 and contains
rule OHadsorption2 occurs 1 times					the above pathway is of length 8 and contains
rule OHdesorption2 occurs 1 times					rule OHadsorption2 occurs 1 times
rule CHscission2 occurs 1 times					rule CHscission occurs 1 times
rule OHscission occurs 1 times					rule CHscission2 occurs 1 times
rule CHformation occurs 1 times					rule CHscission7 occurs 1 times
rule CHformation2 occurs 1 times					rule CCscission occurs 1 times
rule COScission occurs 1 times					rule CdoubleOFromCOH occurs 2 times
Max Ea is			167.223		rule CarbonMonoxideFormation occurs 1 times
					Max Ea is			86.0761
C(CO)(CO)O.[{M}].[{M}]>>C(O_[{M}])(CO)CO_[{M}]	-34.9437	0
C(O_[{M}])(CO)CO_[{M}].[{M}].[{M}]>>C(CO_[{M}])(CO_[{M}])([{M}])O.[{M}H]	-58.1863	42.887			C(CO)(CO)O.[{M}].[{M}]>>C(O_[{M}])(CO)CO_[{M}]	-34.9437	0
C(CO_[{M}])(CO_[{M}])([{M}])O.[{M}].[{M}]>>C(CO_[{M}])(C[{M}])([{M}])O.[{M}]O.[{M}]	52.8647	174.4			C(O_[{M}])(CO)CO_[{M}].[{M}].[{M}]>>C(C(O_[{M}])CO_[{M}])([{M}])O.[{M}H]	-86.2239	14.2886
C(CO_[{M}])(C[{M}])([{M}])O.[{M}H]>>C(O_[{M}])(C[{M}])CO_[{M}].[{M}]	14.6484	102.53			C(C(O_[{M}])CO_[{M}])([{M}])O.[{M}].[{M}]>>C(C([{M}])O)(CO_[{M}])O[{M}].[{M}].[{M}H]	34.8603	83.9919
C(O_[{M}])(C[{M}])CO_[{M}].[{M}H]>>C(O_[{M}])(CO_[{M}])C.[{M}].[{M}]	35.6979	84.7122			C(C([{M}])O)(CO_[{M}])O[{M}]>>C(=O)(C([{M}])O)CO_[{M}].[{M}H]	-47.4437	53.8445
C(O_[{M}])(CO_[{M}])C>>C(CO)(O)C.[{M}].[{M}]	36.1986	0			C(=O)(C([{M}])O)CO_[{M}].[{M}].[{M}]>>C(C(=O)CO_[{M}])([{M}])([{M}])O.[{M}H]	-40.3832	61.0462
					C(C(=O)CO_[{M}])([{M}])([{M}])O>>C(=O)(C(=O)CO_[{M}])[{M}].[{M}H]	-12.418	43.3326
the above pathway is of length 6 and contains					C(=O)(C(=O)CO_[{M}])[{M}].[{M}].[{M}]>>C(=O)([{M}])[{M}].C(=O)(CO_[{M}])[{M}]	-101.938	86.0761
rule OHadsorption2 occurs 1 times					C(=O)([{M}])[{M}]>>O=[C:].[{M}].[{M}]	84.3706	0
rule OHdesorption2 occurs 1 times
rule CHscission7 occurs 1 times					the above pathway is of length 8 and contains
rule CHformation occurs 1 times					rule OHadsorption2 occurs 1 times
rule CHformation2 occurs 1 times					rule CHscission occurs 2 times
rule COScission2 occurs 1 times					rule CCscission occurs 1 times
Max Ea is			174.4		rule OHscission2 occurs 1 times
					rule CdoubleOFormation occurs 1 times
C(CO)(CO)O.[{M}].[{M}]>>C(O_[{M}])(CO)CO_[{M}]	-34.9437	0			rule CdoubleOFromCOH occurs 1 times
C(O_[{M}])(CO)CO_[{M}].[{M}].[{M}]>>C(O_[{M}])(CO[{M}])CO_[{M}].[{M}H]	6.84912	59.9022			rule CarbonMonoxideFormation occurs 1 times
C(O_[{M}])(CO[{M}])CO_[{M}].[{M}].[{M}]>>C(CO[{M}])(O_[{M}])C[{M}].[{M}]O.[{M}]	31.4513	159.625			Max Ea is			86.0761
C(CO[{M}])(O_[{M}])C[{M}].[{M}H]>>C(O_[{M}])(C[{M}])CO_[{M}].[{M}]	-28.9736	58.0683
C(O_[{M}])(C[{M}])CO_[{M}].[{M}H]>>C(O_[{M}])(CO_[{M}])C.[{M}].[{M}]	35.6979	84.7122			C(CO)(CO)O.[{M}].[{M}]>>C(O_[{M}])(CO)CO_[{M}]	-34.9437	0
C(O_[{M}])(CO_[{M}])C>>C(CO)(O)C.[{M}].[{M}]	36.1986	0			C(O_[{M}])(CO)CO_[{M}].[{M}].[{M}]>>C(O[{M}])(CO_[{M}])CO_[{M}].[{M}H]	12.7358	64.9648
					C(O[{M}])(CO_[{M}])CO_[{M}].[{M}].[{M}]>>C(C([{M}])O)(CO_[{M}])O[{M}].[{M}].[{M}H]	-64.0994	36.8556
the above pathway is of length 6 and contains					C(C([{M}])O)(CO_[{M}])O[{M}]>>C(=O)(C([{M}])O)CO_[{M}].[{M}H]	-47.4437	53.8445
rule OHadsorption2 occurs 1 times					C(=O)(C([{M}])O)CO_[{M}].[{M}].[{M}]>>C(C(=O)CO_[{M}])([{M}])([{M}])O.[{M}H]	-40.3832	61.0462
rule OHdesorption2 occurs 1 times					C(C(=O)CO_[{M}])([{M}])([{M}])O>>C(=O)(C(=O)CO_[{M}])[{M}].[{M}H]	-12.418	43.3326
rule OHscission occurs 1 times					C(=O)(C(=O)CO_[{M}])[{M}].[{M}].[{M}]>>C(=O)([{M}])[{M}].C(=O)(CO_[{M}])[{M}]	-101.938	86.0761
rule CHformation occurs 1 times					C(=O)([{M}])[{M}]>>O=[C:].[{M}].[{M}]	84.3706	0
rule OHformation2 occurs 1 times
rule COScission2 occurs 1 times					the above pathway is of length 8 and contains
Max Ea is			159.625		rule OHadsorption2 occurs 1 times
					rule CHscission occurs 1 times
C(CO)(CO)O.[{M}].[{M}]>>C(O_[{M}])(CO)CO_[{M}]	-34.9437	0			rule CHscission2 occurs 1 times
C(O_[{M}])(CO)CO_[{M}].[{M}].[{M}]>>C(O_[{M}])(CO[{M}])CO_[{M}].[{M}H]	6.84912	59.9022			rule CCscission occurs 1 times
C(O_[{M}])(CO[{M}])CO_[{M}].[{M}].[{M}]>>C(O_[{M}])(CO[{M}])CO[{M}].[{M}].[{M}H]	28.9736	78.9293			rule OHscission4 occurs 1 times
C(O_[{M}])(CO[{M}])CO[{M}].[{M}].[{M}]>>C(CO[{M}])(O_[{M}])C[{M}].O([{M}])[{M}]	-15.6414	167.223			rule CdoubleOFormation occurs 1 times
C(CO[{M}])(O_[{M}])C[{M}].[{M}H]>>C(O_[{M}])(C[{M}])CO_[{M}].[{M}]	-28.9736	58.0683			rule CdoubleOFromCOH occurs 1 times
C(O_[{M}])(C[{M}])CO_[{M}].[{M}H]>>C(O_[{M}])(CO_[{M}])C.[{M}].[{M}]	35.6979	84.7122			rule CarbonMonoxideFormation occurs 1 times
C(O_[{M}])(CO_[{M}])C>>C(CO)(O)C.[{M}].[{M}]	36.1986	0			Max Ea is			86.0761
the above pathway is of length 7 and contains					C(CO)(CO)O.[{M}].[{M}]>>C(O_[{M}])(CO)CO_[{M}]	-34.9437	0
rule OHadsorption2 occurs 1 times					C(O_[{M}])(CO)CO_[{M}].[{M}].[{M}]>>C(CO_[{M}])(CO_[{M}])([{M}])O.[{M}H]	-58.1863	42.887
rule OHdesorption2 occurs 1 times					C(CO_[{M}])(CO_[{M}])([{M}])O.[{M}].[{M}]>>C(O[{M}])(CO_[{M}])(CO_[{M}])[{M}].[{M}H]	28.2626	78.3178
rule OHscission occurs 1 times					C(O[{M}])(CO_[{M}])(CO_[{M}])[{M}].[{M}].[{M}]>>C(=O)(C([{M}])O)CO_[{M}].[{M}].[{M}].[{M}].[{M}H]	-68.8835	31.9758
rule OHscission2 occurs 1 times					C(=O)(C([{M}])O)CO_[{M}].[{M}].[{M}]>>C(C(=O)CO_[{M}])([{M}])([{M}])O.[{M}H]	-40.3832	61.0462
rule CHformation occurs 1 times					C(C(=O)CO_[{M}])([{M}])([{M}])O>>C(=O)(C(=O)CO_[{M}])[{M}].[{M}H]	-12.418	43.3326
rule OHformation2 occurs 1 times					C(=O)(C(=O)CO_[{M}])[{M}].[{M}].[{M}]>>C(=O)([{M}])[{M}].C(=O)(CO_[{M}])[{M}]	-101.938	86.0761
rule COScission occurs 1 times					C(=O)([{M}])[{M}]>>O=[C:].[{M}].[{M}]	84.3706	0
Max Ea is			167.223
					the above pathway is of length 8 and contains
C(CO)(CO)O.[{M}].[{M}]>>C(O_[{M}])(CO)CO_[{M}]	-34.9437	0			rule OHadsorption2 occurs 1 times
C(O_[{M}])(CO)CO_[{M}].[{M}].[{M}]>>C(O[{M}])(CO_[{M}])CO_[{M}].[{M}H]	12.7358	64.9648			rule CHscission occurs 1 times
C(O[{M}])(CO_[{M}])CO_[{M}].[{M}].[{M}]>>C(CO_[{M}])(O[{M}])C[{M}].[{M}]O.[{M}]	31.4513	159.625			rule CHscission5 occurs 1 times
C(CO_[{M}])(O[{M}])C[{M}].[{M}H]>>C(O_[{M}])(C[{M}])CO_[{M}].[{M}]	-34.8603	58.8924			rule CHscission7 occurs 1 times
C(O_[{M}])(C[{M}])CO_[{M}].[{M}H]>>C(O_[{M}])(CO_[{M}])C.[{M}].[{M}]	35.6979	84.7122			rule CCscission occurs 1 times
C(O_[{M}])(CO_[{M}])C>>C(CO)(O)C.[{M}].[{M}]	36.1986	0			rule OHscission occurs 1 times
					rule CdoubleOFromCOH occurs 1 times
the above pathway is of length 6 and contains					rule CarbonMonoxideFormation occurs 1 times
rule OHadsorption2 occurs 1 times					Max Ea is			86.0761
rule OHdesorption2 occurs 1 times
rule OHscission4 occurs 1 times					C(CO)(CO)O.[{M}].[{M}]>>C(O_[{M}])(CO)CO_[{M}]	-34.9437	0
rule CHformation occurs 1 times					C(O_[{M}])(CO)CO_[{M}].[{M}].[{M}]>>C(O[{M}])(CO_[{M}])CO_[{M}].[{M}H]	12.7358	64.9648
rule OHformation2 occurs 1 times					C(O[{M}])(CO_[{M}])CO_[{M}].[{M}].[{M}]>>C(O[{M}])(CO_[{M}])(CO_[{M}])[{M}].[{M}H]	-42.6595	58.7243
rule COScission2 occurs 1 times					C(O[{M}])(CO_[{M}])(CO_[{M}])[{M}].[{M}].[{M}]>>C(=O)(C([{M}])O)CO_[{M}].[{M}].[{M}].[{M}].[{M}H]	-68.8835	31.9758
Max Ea is			159.625		C(=O)(C([{M}])O)CO_[{M}].[{M}].[{M}]>>C(C(=O)CO_[{M}])([{M}])([{M}])O.[{M}H]	-40.3832	61.0462
					C(C(=O)CO_[{M}])([{M}])([{M}])O>>C(=O)(C(=O)CO_[{M}])[{M}].[{M}H]	-12.418	43.3326
C(CO)(CO)O.[{M}].[{M}]>>C(O_[{M}])(CO)CO_[{M}]	-34.9437	0			C(=O)(C(=O)CO_[{M}])[{M}].[{M}].[{M}]>>C(=O)([{M}])[{M}].C(=O)(CO_[{M}])[{M}]	-101.938	86.0761
C(O_[{M}])(CO)CO_[{M}].[{M}].[{M}]>>C(O_[{M}])(CO[{M}])CO_[{M}].[{M}H]	6.84912	59.9022			C(=O)([{M}])[{M}]>>O=[C:].[{M}].[{M}]	84.3706	0
C(O_[{M}])(CO[{M}])CO_[{M}].[{M}].[{M}]>>C(O[{M}])(CO[{M}])CO_[{M}].[{M}].[{M}H]	34.8603	83.9919
C(O[{M}])(CO[{M}])CO_[{M}].[{M}].[{M}]>>C(CO_[{M}])(O[{M}])C[{M}].O([{M}])[{M}]	-15.6414	167.223			the above pathway is of length 8 and contains
C(CO_[{M}])(O[{M}])C[{M}].[{M}H]>>C(O_[{M}])(C[{M}])CO_[{M}].[{M}]	-34.8603	58.8924			rule OHadsorption2 occurs 1 times
C(O_[{M}])(C[{M}])CO_[{M}].[{M}H]>>C(O_[{M}])(CO_[{M}])C.[{M}].[{M}]	35.6979	84.7122			rule CHscission occurs 2 times
C(O_[{M}])(CO_[{M}])C>>C(CO)(O)C.[{M}].[{M}]	36.1986	0			rule CHscission5 occurs 1 times
					rule CCscission occurs 1 times
the above pathway is of length 7 and contains					rule OHscission4 occurs 1 times
rule OHadsorption2 occurs 1 times					rule CdoubleOFromCOH occurs 1 times
rule OHdesorption2 occurs 1 times					rule CarbonMonoxideFormation occurs 1 times
rule OHscission occurs 1 times					Max Ea is			86.0761
rule OHscission2 occurs 1 times
rule CHformation occurs 1 times					C(CO)(CO)O.[{M}].[{M}]>>C(O_[{M}])(CO)CO_[{M}]	-34.9437	0
rule OHformation2 occurs 1 times					C(O_[{M}])(CO)CO_[{M}].[{M}].[{M}]>>C(C(O_[{M}])CO_[{M}])([{M}])O.[{M}H]	-86.2239	14.2886
rule COScission occurs 1 times					C(C(O_[{M}])CO_[{M}])([{M}])O.[{M}].[{M}]>>C(C(O_[{M}])CO_[{M}])([{M}])([{M}])O.[{M}H]	-26.883	74.8163
Max Ea is			167.223		C(C(O_[{M}])CO_[{M}])([{M}])([{M}])O.[{M}].[{M}]>>C(C(CO_[{M}])([{M}])O)([{M}])([{M}])O.[{M}].[{M}H]	-6.0009	96.1161
					C(C(CO_[{M}])([{M}])O)([{M}])([{M}])O>>C(C(=O)[{M}])(CO_[{M}])([{M}])O.[{M}H]	-46.2691	14.2206
C(CO)(CO)O.[{M}].[{M}]>>C(O_[{M}])(CO)CO_[{M}]	-34.9437	0			C(C(=O)[{M}])(CO_[{M}])([{M}])O>>C(=O)(C(=O)CO_[{M}])[{M}].[{M}H]	13.7685	65.8529
C(O_[{M}])(CO)CO_[{M}].[{M}].[{M}]>>C(O[{M}])(CO_[{M}])CO_[{M}].[{M}H]	12.7358	64.9648			C(=O)(C(=O)CO_[{M}])[{M}].[{M}].[{M}]>>C(=O)([{M}])[{M}].C(=O)(CO_[{M}])[{M}]	-101.938	86.0761
C(O[{M}])(CO_[{M}])CO_[{M}].[{M}].[{M}]>>C(O[{M}])(CO[{M}])CO_[{M}].[{M}].[{M}H]	28.9736	78.9293			C(=O)([{M}])[{M}]>>O=[C:].[{M}].[{M}]	84.3706	0
C(O[{M}])(CO[{M}])CO_[{M}].[{M}].[{M}]>>C(CO_[{M}])(O[{M}])C[{M}].O([{M}])[{M}]	-15.6414	167.223
C(CO_[{M}])(O[{M}])C[{M}].[{M}H]>>C(O_[{M}])(C[{M}])CO_[{M}].[{M}]	-34.8603	58.8924			the above pathway is of length 8 and contains
C(O_[{M}])(C[{M}])CO_[{M}].[{M}H]>>C(O_[{M}])(CO_[{M}])C.[{M}].[{M}]	35.6979	84.7122			rule OHadsorption2 occurs 1 times
C(O_[{M}])(CO_[{M}])C>>C(CO)(O)C.[{M}].[{M}]	36.1986	0			rule CHscission occurs 2 times
					rule CHscission2 occurs 1 times
the above pathway is of length 7 and contains					rule CCscission occurs 1 times
rule OHadsorption2 occurs 1 times					rule CdoubleOFromCOH occurs 2 times
rule OHdesorption2 occurs 1 times					rule CarbonMonoxideFormation occurs 1 times
rule OHscission2 occurs 1 times					Max Ea is			96.1161
rule OHscission4 occurs 1 times
rule CHformation occurs 1 times					C(CO)(CO)O.[{M}].[{M}]>>C(O_[{M}])(CO)CO_[{M}]	-34.9437	0
rule OHformation2 occurs 1 times					C(O_[{M}])(CO)CO_[{M}].[{M}].[{M}]>>C(C(O_[{M}])CO_[{M}])([{M}])O.[{M}H]	-86.2239	14.2886
rule COScission occurs 1 times					C(C(O_[{M}])CO_[{M}])([{M}])O.[{M}].[{M}]>>C(C([{M}])O)(CO_[{M}])([{M}])O.[{M}].[{M}H]	-14.6484	87.2957
Max Ea is			167.223		C(C([{M}])O)(CO_[{M}])([{M}])O.[{M}].[{M}]>>C(C(CO_[{M}])([{M}])O)([{M}])([{M}])O.[{M}H]	-18.2355	83.6367
					C(C(CO_[{M}])([{M}])O)([{M}])([{M}])O>>C(C(=O)[{M}])(CO_[{M}])([{M}])O.[{M}H]	-46.2691	14.2206
C(CO)(CO)O.[{M}].[{M}]>>C(O_[{M}])(CO)CO_[{M}]	-34.9437	0			C(C(=O)[{M}])(CO_[{M}])([{M}])O>>C(=O)(C(=O)CO_[{M}])[{M}].[{M}H]	13.7685	65.8529
C(O_[{M}])(CO)CO_[{M}].[{M}].[{M}]>>C(C(O_[{M}])CO_[{M}])([{M}])O.[{M}H]	-86.2239	14.2886			C(=O)(C(=O)CO_[{M}])[{M}].[{M}].[{M}]>>C(=O)([{M}])[{M}].C(=O)(CO_[{M}])[{M}]	-101.938	86.0761
C(C(O_[{M}])CO_[{M}])([{M}])O.[{M}].[{M}]>>C(C([{M}])O)(O_[{M}])C[{M}].[{M}]O.[{M}]	31.4513	159.625			C(=O)([{M}])[{M}]>>O=[C:].[{M}].[{M}]	84.3706	0
C(C([{M}])O)(O_[{M}])C[{M}].[{M}H]>>C(C([{M}])O)(O_[{M}])C.[{M}].[{M}]	35.6979	84.7122
C(C([{M}])O)(O_[{M}])C.[{M}H]>>C(O_[{M}])(CO_[{M}])C.[{M}]	64.0994	103.519			the above pathway is of length 8 and contains
C(O_[{M}])(CO_[{M}])C>>C(CO)(O)C.[{M}].[{M}]	36.1986	0			rule OHadsorption2 occurs 1 times
					rule CHscission occurs 2 times
the above pathway is of length 6 and contains					rule CHscission2 occurs 1 times
rule OHadsorption2 occurs 1 times					rule CCscission occurs 1 times
rule OHdesorption2 occurs 1 times					rule CdoubleOFromCOH occurs 2 times
rule CHscission occurs 1 times					rule CarbonMonoxideFormation occurs 1 times
rule CHformation occurs 1 times					Max Ea is			87.2957
rule CHformation2 occurs 1 times
rule COScission2 occurs 1 times					C(CO)(CO)O.[{M}].[{M}]>>C(O_[{M}])(CO)CO_[{M}]	-34.9437	0
Max Ea is			159.625		C(O_[{M}])(CO)CO_[{M}].[{M}].[{M}]>>C(CO_[{M}])(CO_[{M}])([{M}])O.[{M}H]	-58.1863	42.887
					C(CO_[{M}])(CO_[{M}])([{M}])O.[{M}].[{M}]>>C(C([{M}])O)(CO_[{M}])([{M}])O.[{M}].[{M}H]	-42.686	58.6973
C(CO)(CO)O.[{M}].[{M}]>>C(O_[{M}])(CO)CO_[{M}]	-34.9437	0			C(C([{M}])O)(CO_[{M}])([{M}])O.[{M}].[{M}]>>C(C(CO_[{M}])([{M}])O)([{M}])([{M}])O.[{M}H]	-18.2355	83.6367
C(O_[{M}])(CO)CO_[{M}].[{M}].[{M}]>>C(O_[{M}])(C[{M}])CO_[{M}].[{M}]O	9.32679	144.359			C(C(CO_[{M}])([{M}])O)([{M}])([{M}])O>>C(C(=O)[{M}])(CO_[{M}])([{M}])O.[{M}H]	-46.2691	14.2206
C(O_[{M}])(C[{M}])CO_[{M}].[{M}].[{M}]>>C(C([{M}])O)(O_[{M}])C[{M}].[{M}].[{M}H]	-64.0994	36.8556			C(C(=O)[{M}])(CO_[{M}])([{M}])O>>C(=O)(C(=O)CO_[{M}])[{M}].[{M}H]	13.7685	65.8529
C(C([{M}])O)(O_[{M}])C[{M}].[{M}H]>>C(C([{M}])O)(O_[{M}])C.[{M}].[{M}]	35.6979	84.7122			C(=O)(C(=O)CO_[{M}])[{M}].[{M}].[{M}]>>C(=O)([{M}])[{M}].C(=O)(CO_[{M}])[{M}]	-101.938	86.0761
C(C([{M}])O)(O_[{M}])C.[{M}H]>>C(O_[{M}])(CO_[{M}])C.[{M}]	64.0994	103.519			C(=O)([{M}])[{M}]>>O=[C:].[{M}].[{M}]	84.3706	0
C(O_[{M}])(CO_[{M}])C>>C(CO)(O)C.[{M}].[{M}]	36.1986	0
					the above pathway is of length 8 and contains
the above pathway is of length 6 and contains					rule OHadsorption2 occurs 1 times
rule OHadsorption2 occurs 1 times					rule CHscission occurs 1 times
rule OHdesorption2 occurs 1 times					rule CHscission2 occurs 1 times
rule CHscission2 occurs 1 times					rule CHscission7 occurs 1 times
rule CHformation occurs 1 times					rule CCscission occurs 1 times
rule CHformation2 occurs 1 times					rule CdoubleOFromCOH occurs 2 times
rule COScission occurs 1 times					rule CarbonMonoxideFormation occurs 1 times
Max Ea is			144.359		Max Ea is			86.0761
C(CO)(CO)O.[{M}].[{M}]>>C(O_[{M}])(CO)CO_[{M}]	-34.9437	0			C(CO)(CO)O.[{M}].[{M}]>>C(O_[{M}])(CO)CO_[{M}]	-34.9437	0
C(O_[{M}])(CO)CO_[{M}].[{M}].[{M}]>>C(O_[{M}])(CO[{M}])CO_[{M}].[{M}H]	6.84912	59.9022			C(O_[{M}])(CO)CO_[{M}].[{M}].[{M}]>>C(C(O_[{M}])CO_[{M}])([{M}])O.[{M}H]	-86.2239	14.2886
C(O_[{M}])(CO[{M}])CO_[{M}].[{M}].[{M}]>>C(O_[{M}])(C[{M}])CO_[{M}].O([{M}])[{M}]	-15.6414	167.223			C(C(O_[{M}])CO_[{M}])([{M}])O.[{M}].[{M}]>>C(C(O_[{M}])CO_[{M}])([{M}])([{M}])O.[{M}H]	-26.883	74.8163
C(O_[{M}])(C[{M}])CO_[{M}].[{M}].[{M}]>>C(C([{M}])O)(O_[{M}])C[{M}].[{M}].[{M}H]	-64.0994	36.8556			C(C(O_[{M}])CO_[{M}])([{M}])([{M}])O>>C(=O)(C(O_[{M}])CO_[{M}])[{M}].[{M}H]	-29.9239	28.2775
C(C([{M}])O)(O_[{M}])C[{M}].[{M}H]>>C(C([{M}])O)(O_[{M}])C.[{M}].[{M}]	35.6979	84.7122			C(=O)(C(O_[{M}])CO_[{M}])[{M}].[{M}].[{M}]>>C(C(=O)[{M}])(CO_[{M}])([{M}])O.[{M}].[{M}H]	-22.3461	79.444
C(C([{M}])O)(O_[{M}])C.[{M}H]>>C(O_[{M}])(CO_[{M}])C.[{M}]	64.0994	103.519			C(C(=O)[{M}])(CO_[{M}])([{M}])O>>C(=O)(C(=O)CO_[{M}])[{M}].[{M}H]	13.7685	65.8529
C(O_[{M}])(CO_[{M}])C>>C(CO)(O)C.[{M}].[{M}]	36.1986	0			C(=O)(C(=O)CO_[{M}])[{M}].[{M}].[{M}]>>C(=O)([{M}])[{M}].C(=O)(CO_[{M}])[{M}]	-101.938	86.0761
					C(=O)([{M}])[{M}]>>O=[C:].[{M}].[{M}]	84.3706	0
the above pathway is of length 7 and contains
rule OHadsorption2 occurs 1 times					the above pathway is of length 8 and contains
rule OHdesorption2 occurs 1 times					rule OHadsorption2 occurs 1 times
rule CHscission2 occurs 1 times					rule CHscission occurs 2 times
rule OHscission occurs 1 times					rule CHscission2 occurs 1 times
rule CHformation occurs 1 times					rule CCscission occurs 1 times
rule CHformation2 occurs 1 times					rule CdoubleOFromCOH occurs 2 times
rule COScission occurs 1 times					rule CarbonMonoxideFormation occurs 1 times
Max Ea is			167.223		Max Ea is			86.0761
C(CO)(CO)O.[{M}].[{M}]>>C(O_[{M}])(CO)CO_[{M}]	-34.9437	0			C(CO)(CO)O.[{M}].[{M}]>>C(O_[{M}])(CO)CO_[{M}]	-34.9437	0
C(O_[{M}])(CO)CO_[{M}].[{M}].[{M}]>>C(C(O_[{M}])CO_[{M}])([{M}])O.[{M}H]	-86.2239	14.2886			C(O_[{M}])(CO)CO_[{M}].[{M}].[{M}]>>C(C(O_[{M}])CO_[{M}])([{M}])O.[{M}H]	-86.2239	14.2886
C(C(O_[{M}])CO_[{M}])([{M}])O.[{M}].[{M}]>>C(C([{M}])O)(CO[{M}])O_[{M}].[{M}].[{M}H]	28.9736	78.9293			C(C(O_[{M}])CO_[{M}])([{M}])O.[{M}].[{M}]>>C(C(O_[{M}])CO_[{M}])(O[{M}])[{M}].[{M}H]	28.2626	78.3178
C(C([{M}])O)(CO[{M}])O_[{M}].[{M}].[{M}]>>C(C([{M}])O)(O_[{M}])C[{M}].O([{M}])[{M}]	-15.6414	167.223			C(C(O_[{M}])CO_[{M}])(O[{M}])[{M}].[{M}].[{M}]>>C(=O)(C(O_[{M}])CO_[{M}])[{M}].[{M}].[{M}].[{M}H]	-85.0694	15.4662
C(C([{M}])O)(O_[{M}])C[{M}].[{M}H]>>C(C([{M}])O)(O_[{M}])C.[{M}].[{M}]	35.6979	84.7122			C(=O)(C(O_[{M}])CO_[{M}])[{M}].[{M}].[{M}]>>C(C(=O)[{M}])(CO_[{M}])([{M}])O.[{M}].[{M}H]	-22.3461	79.444
C(C([{M}])O)(O_[{M}])C.[{M}H]>>C(O_[{M}])(CO_[{M}])C.[{M}]	64.0994	103.519			C(C(=O)[{M}])(CO_[{M}])([{M}])O>>C(=O)(C(=O)CO_[{M}])[{M}].[{M}H]	13.7685	65.8529
C(O_[{M}])(CO_[{M}])C>>C(CO)(O)C.[{M}].[{M}]	36.1986	0			C(=O)(C(=O)CO_[{M}])[{M}].[{M}].[{M}]>>C(=O)([{M}])[{M}].C(=O)(CO_[{M}])[{M}]	-101.938	86.0761
					C(=O)([{M}])[{M}]>>O=[C:].[{M}].[{M}]	84.3706	0
the above pathway is of length 7 and contains
rule OHadsorption2 occurs 1 times					the above pathway is of length 8 and contains
rule OHdesorption2 occurs 1 times					rule OHadsorption2 occurs 1 times
rule CHscission occurs 1 times					rule CHscission occurs 1 times
rule OHscission2 occurs 1 times					rule CHscission2 occurs 1 times
rule CHformation occurs 1 times					rule CHscission4 occurs 1 times
rule CHformation2 occurs 1 times					rule CCscission occurs 1 times
rule COScission occurs 1 times					rule OHscission occurs 1 times
Max Ea is			167.223		rule CdoubleOFromCOH occurs 1 times
					rule CarbonMonoxideFormation occurs 1 times
C(CO)(CO)O.[{M}].[{M}]>>C(O_[{M}])(CO)CO_[{M}]	-34.9437	0			Max Ea is			86.0761
C(O_[{M}])(CO)CO_[{M}].[{M}].[{M}]>>C(O_[{M}])(CO[{M}])CO_[{M}].[{M}H]	6.84912	59.9022
C(O_[{M}])(CO[{M}])CO_[{M}].[{M}].[{M}]>>C(C([{M}])O)(CO[{M}])O_[{M}].[{M}].[{M}H]	-64.0994	36.8556			C(CO)(CO)O.[{M}].[{M}]>>C(O_[{M}])(CO)CO_[{M}]	-34.9437	0
C(C([{M}])O)(CO[{M}])O_[{M}].[{M}].[{M}]>>C(C([{M}])O)(O_[{M}])C[{M}].O([{M}])[{M}]	-15.6414	167.223			C(O_[{M}])(CO)CO_[{M}].[{M}].[{M}]>>C(O_[{M}])(CO[{M}])CO_[{M}].[{M}H]	6.84912	59.9022
C(C([{M}])O)(O_[{M}])C[{M}].[{M}H]>>C(C([{M}])O)(O_[{M}])C.[{M}].[{M}]	35.6979	84.7122			C(O_[{M}])(CO[{M}])CO_[{M}].[{M}].[{M}]>>C(C(O_[{M}])CO_[{M}])(O[{M}])[{M}].[{M}H]	-64.8105	36.1303
C(C([{M}])O)(O_[{M}])C.[{M}H]>>C(O_[{M}])(CO_[{M}])C.[{M}]	64.0994	103.519			C(C(O_[{M}])CO_[{M}])(O[{M}])[{M}].[{M}].[{M}]>>C(=O)(C(O_[{M}])CO_[{M}])[{M}].[{M}].[{M}].[{M}H]	-85.0694	15.4662
C(O_[{M}])(CO_[{M}])C>>C(CO)(O)C.[{M}].[{M}]	36.1986	0			C(=O)(C(O_[{M}])CO_[{M}])[{M}].[{M}].[{M}]>>C(C(=O)[{M}])(CO_[{M}])([{M}])O.[{M}].[{M}H]	-22.3461	79.444
					C(C(=O)[{M}])(CO_[{M}])([{M}])O>>C(=O)(C(=O)CO_[{M}])[{M}].[{M}H]	13.7685	65.8529
the above pathway is of length 7 and contains					C(=O)(C(=O)CO_[{M}])[{M}].[{M}].[{M}]>>C(=O)([{M}])[{M}].C(=O)(CO_[{M}])[{M}]	-101.938	86.0761
rule OHadsorption2 occurs 1 times					C(=O)([{M}])[{M}]>>O=[C:].[{M}].[{M}]	84.3706	0
rule OHdesorption2 occurs 1 times
rule CHscission2 occurs 1 times					the above pathway is of length 8 and contains
rule OHscission occurs 1 times					rule OHadsorption2 occurs 1 times
rule CHformation occurs 1 times					rule CHscission occurs 1 times
rule CHformation2 occurs 1 times					rule CHscission2 occurs 1 times
rule COScission occurs 1 times					rule CHscission4 occurs 1 times
Max Ea is			167.223		rule CCscission occurs 1 times
					rule OHscission occurs 1 times
C(CO)(CO)O.[{M}].[{M}]>>C(O_[{M}])(CO)CO_[{M}]	-34.9437	0			rule CdoubleOFromCOH occurs 1 times
C(O_[{M}])(CO)CO_[{M}].[{M}].[{M}]>>C(CO_[{M}])(CO_[{M}])([{M}])O.[{M}H]	-58.1863	42.887			rule CarbonMonoxideFormation occurs 1 times
C(CO_[{M}])(CO_[{M}])([{M}])O.[{M}].[{M}]>>C(CO_[{M}])(C[{M}])([{M}])O.[{M}]O.[{M}]	52.8647	174.4			Max Ea is			86.0761
C(CO_[{M}])(C[{M}])([{M}])O.[{M}H]>>C(CO_[{M}])([{M}])(O)C.[{M}].[{M}]	14.2844	66.2966
C(CO_[{M}])([{M}])(O)C.[{M}H]>>C(O_[{M}])(CO_[{M}])C.[{M}]	36.0618	102.958			C(CO)(CO)O.[{M}].[{M}]>>C(O_[{M}])(CO)CO_[{M}]	-34.9437	0
C(O_[{M}])(CO_[{M}])C>>C(CO)(O)C.[{M}].[{M}]	36.1986	0			C(O_[{M}])(CO)CO_[{M}].[{M}].[{M}]>>C(C(O_[{M}])CO_[{M}])([{M}])O.[{M}H]	-86.2239	14.2886
					C(C(O_[{M}])CO_[{M}])([{M}])O.[{M}].[{M}]>>C(C(O_[{M}])CO_[{M}])(O[{M}])[{M}].[{M}H]	28.2626	78.3178
the above pathway is of length 6 and contains					C(C(O_[{M}])CO_[{M}])(O[{M}])[{M}]>>C(=O)(C(O_[{M}])CO_[{M}])[{M}].[{M}H]	-85.0694	15.4662
rule OHadsorption2 occurs 1 times					C(=O)(C(O_[{M}])CO_[{M}])[{M}].[{M}].[{M}]>>C(C(=O)[{M}])(CO_[{M}])([{M}])O.[{M}].[{M}H]	-22.3461	79.444
rule OHdesorption2 occurs 1 times					C(C(=O)[{M}])(CO_[{M}])([{M}])O>>C(=O)(C(=O)CO_[{M}])[{M}].[{M}H]	13.7685	65.8529
rule CHscission7 occurs 1 times					C(=O)(C(=O)CO_[{M}])[{M}].[{M}].[{M}]>>C(=O)([{M}])[{M}].C(=O)(CO_[{M}])[{M}]	-101.938	86.0761
rule CHformation occurs 1 times					C(=O)([{M}])[{M}]>>O=[C:].[{M}].[{M}]	84.3706	0
rule CHformation2 occurs 1 times
rule COScission2 occurs 1 times					the above pathway is of length 8 and contains
Max Ea is			174.4		rule OHadsorption2 occurs 1 times
					rule CHscission occurs 1 times
C(CO)(CO)O.[{M}].[{M}]>>C(O_[{M}])(CO)CO_[{M}]	-34.9437	0			rule CHscission2 occurs 1 times
C(O_[{M}])(CO)CO_[{M}].[{M}].[{M}]>>C(O_[{M}])(C[{M}])CO_[{M}].[{M}]O	9.32679	144.359			rule CCscission occurs 1 times
C(O_[{M}])(C[{M}])CO_[{M}].[{M}].[{M}]>>C(CO_[{M}])(C[{M}])([{M}])O.[{M}].[{M}H]	-14.6484	87.2957			rule OHscission occurs 1 times
C(CO_[{M}])(C[{M}])([{M}])O.[{M}H]>>C(CO_[{M}])([{M}])(O)C.[{M}].[{M}]	14.2844	66.2966			rule CdoubleOFormation occurs 1 times
C(CO_[{M}])([{M}])(O)C.[{M}H]>>C(O_[{M}])(CO_[{M}])C.[{M}]	36.0618	102.958			rule CdoubleOFromCOH occurs 1 times
C(O_[{M}])(CO_[{M}])C>>C(CO)(O)C.[{M}].[{M}]	36.1986	0			rule CarbonMonoxideFormation occurs 1 times
					Max Ea is			86.0761
the above pathway is of length 6 and contains
rule OHadsorption2 occurs 1 times					C(CO)(CO)O.[{M}].[{M}]>>C(O_[{M}])(CO)CO_[{M}]	-34.9437	0
rule OHdesorption2 occurs 1 times					C(O_[{M}])(CO)CO_[{M}].[{M}].[{M}]>>C(O_[{M}])(CO[{M}])CO_[{M}].[{M}H]	6.84912	59.9022
rule CHscission2 occurs 1 times					C(O_[{M}])(CO[{M}])CO_[{M}].[{M}].[{M}]>>C(C(O_[{M}])CO_[{M}])(O[{M}])[{M}].[{M}H]	-64.8105	36.1303
rule CHformation occurs 1 times					C(C(O_[{M}])CO_[{M}])(O[{M}])[{M}]>>C(=O)(C(O_[{M}])CO_[{M}])[{M}].[{M}H]	-85.0694	15.4662
rule CHformation2 occurs 1 times					C(=O)(C(O_[{M}])CO_[{M}])[{M}].[{M}].[{M}]>>C(C(=O)[{M}])(CO_[{M}])([{M}])O.[{M}].[{M}H]	-22.3461	79.444
rule COScission occurs 1 times					C(C(=O)[{M}])(CO_[{M}])([{M}])O>>C(=O)(C(=O)CO_[{M}])[{M}].[{M}H]	13.7685	65.8529
Max Ea is			144.359		C(=O)(C(=O)CO_[{M}])[{M}].[{M}].[{M}]>>C(=O)([{M}])[{M}].C(=O)(CO_[{M}])[{M}]	-101.938	86.0761
					C(=O)([{M}])[{M}]>>O=[C:].[{M}].[{M}]	84.3706	0
C(CO)(CO)O.[{M}].[{M}]>>C(O_[{M}])(CO)CO_[{M}]	-34.9437	0
C(O_[{M}])(CO)CO_[{M}].[{M}].[{M}]>>C(O_[{M}])(CO[{M}])CO_[{M}].[{M}H]	6.84912	59.9022			the above pathway is of length 8 and contains
C(O_[{M}])(CO[{M}])CO_[{M}].[{M}].[{M}]>>C(O_[{M}])(C[{M}])CO_[{M}].O([{M}])[{M}]	-15.6414	167.223			rule OHadsorption2 occurs 1 times
C(O_[{M}])(C[{M}])CO_[{M}].[{M}].[{M}]>>C(CO_[{M}])(C[{M}])([{M}])O.[{M}].[{M}H]	-14.6484	87.2957			rule CHscission occurs 1 times
C(CO_[{M}])(C[{M}])([{M}])O.[{M}H]>>C(CO_[{M}])([{M}])(O)C.[{M}].[{M}]	14.2844	66.2966			rule CHscission2 occurs 1 times
C(CO_[{M}])([{M}])(O)C.[{M}H]>>C(O_[{M}])(CO_[{M}])C.[{M}]	36.0618	102.958			rule CCscission occurs 1 times
C(O_[{M}])(CO_[{M}])C>>C(CO)(O)C.[{M}].[{M}]	36.1986	0			rule OHscission occurs 1 times
					rule CdoubleOFormation occurs 1 times
the above pathway is of length 7 and contains					rule CdoubleOFromCOH occurs 1 times
rule OHadsorption2 occurs 1 times					rule CarbonMonoxideFormation occurs 1 times
rule OHdesorption2 occurs 1 times					Max Ea is			86.0761
rule CHscission2 occurs 1 times
rule OHscission occurs 1 times					C(CO)(CO)O.[{M}].[{M}]>>C(O_[{M}])(CO)CO_[{M}]	-34.9437	0
rule CHformation occurs 1 times					C(O_[{M}])(CO)CO_[{M}].[{M}].[{M}]>>C(C(O_[{M}])CO_[{M}])([{M}])O.[{M}H]	-86.2239	14.2886
rule CHformation2 occurs 1 times					C(C(O_[{M}])CO_[{M}])([{M}])O.[{M}].[{M}]>>C(C([{M}])O)(CO_[{M}])([{M}])O.[{M}].[{M}H]	-14.6484	87.2957
rule COScission occurs 1 times					C(C([{M}])O)(CO_[{M}])([{M}])O>>C(C=O)(CO_[{M}])([{M}])O.[{M}H]	-30.8643	27.4687
Max Ea is			167.223		C(C=O)(CO_[{M}])([{M}])O.[{M}].[{M}]>>C(C(=O)[{M}])(CO_[{M}])([{M}])O.[{M}H]	-33.6404	67.9238
					C(C(=O)[{M}])(CO_[{M}])([{M}])O>>C(=O)(C(=O)CO_[{M}])[{M}].[{M}H]	13.7685	65.8529
C(CO)(CO)O.[{M}].[{M}]>>C(O_[{M}])(CO)CO_[{M}]	-34.9437	0			C(=O)(C(=O)CO_[{M}])[{M}].[{M}].[{M}]>>C(=O)([{M}])[{M}].C(=O)(CO_[{M}])[{M}]	-101.938	86.0761
C(O_[{M}])(CO)CO_[{M}].[{M}].[{M}]>>C(O_[{M}])(CO[{M}])CO_[{M}].[{M}H]	6.84912	59.9022			C(=O)([{M}])[{M}]>>O=[C:].[{M}].[{M}]	84.3706	0
C(O_[{M}])(CO[{M}])CO_[{M}].[{M}].[{M}]>>C(CO[{M}])(O_[{M}])C[{M}].[{M}]O.[{M}]	31.4513	159.625
C(CO[{M}])(O_[{M}])C[{M}].[{M}H]>>C(CO[{M}])(O_[{M}])C.[{M}].[{M}]	35.6979	84.7122			the above pathway is of length 8 and contains
C(CO[{M}])(O_[{M}])C.[{M}H]>>C(O_[{M}])(CO_[{M}])C.[{M}]	-28.9736	58.0683			rule OHadsorption2 occurs 1 times
C(O_[{M}])(CO_[{M}])C>>C(CO)(O)C.[{M}].[{M}]	36.1986	0			rule CHscission occurs 2 times
					rule CHscission2 occurs 1 times
the above pathway is of length 6 and contains					rule CCscission occurs 1 times
rule OHadsorption2 occurs 1 times					rule CdoubleOFromCOH occurs 2 times
rule OHdesorption2 occurs 1 times					rule CarbonMonoxideFormation occurs 1 times
rule OHscission occurs 1 times					Max Ea is			87.2957
rule CHformation occurs 1 times
rule OHformation2 occurs 1 times					C(CO)(CO)O.[{M}].[{M}]>>C(O_[{M}])(CO)CO_[{M}]	-34.9437	0
rule COScission2 occurs 1 times					C(O_[{M}])(CO)CO_[{M}].[{M}].[{M}]>>C(CO_[{M}])(CO_[{M}])([{M}])O.[{M}H]	-58.1863	42.887
Max Ea is			159.625		C(CO_[{M}])(CO_[{M}])([{M}])O.[{M}].[{M}]>>C(C([{M}])O)(CO_[{M}])([{M}])O.[{M}].[{M}H]	-42.686	58.6973
					C(C([{M}])O)(CO_[{M}])([{M}])O>>C(C=O)(CO_[{M}])([{M}])O.[{M}H]	-30.8643	27.4687
C(CO)(CO)O.[{M}].[{M}]>>C(O_[{M}])(CO)CO_[{M}]	-34.9437	0			C(C=O)(CO_[{M}])([{M}])O.[{M}].[{M}]>>C(C(=O)[{M}])(CO_[{M}])([{M}])O.[{M}H]	-33.6404	67.9238
C(O_[{M}])(CO)CO_[{M}].[{M}].[{M}]>>C(O_[{M}])(C[{M}])CO_[{M}].[{M}]O	9.32679	144.359			C(C(=O)[{M}])(CO_[{M}])([{M}])O>>C(=O)(C(=O)CO_[{M}])[{M}].[{M}H]	13.7685	65.8529
C(O_[{M}])(C[{M}])CO_[{M}].[{M}].[{M}]>>C(CO[{M}])(O_[{M}])C[{M}].[{M}].[{M}H]	28.9736	78.9293			C(=O)(C(=O)CO_[{M}])[{M}].[{M}].[{M}]>>C(=O)([{M}])[{M}].C(=O)(CO_[{M}])[{M}]	-101.938	86.0761
C(CO[{M}])(O_[{M}])C[{M}].[{M}H]>>C(CO[{M}])(O_[{M}])C.[{M}].[{M}]	35.6979	84.7122			C(=O)([{M}])[{M}]>>O=[C:].[{M}].[{M}]	84.3706	0
C(CO[{M}])(O_[{M}])C.[{M}H]>>C(O_[{M}])(CO_[{M}])C.[{M}]	-28.9736	58.0683
C(O_[{M}])(CO_[{M}])C>>C(CO)(O)C.[{M}].[{M}]	36.1986	0			the above pathway is of length 8 and contains
					rule OHadsorption2 occurs 1 times
the above pathway is of length 6 and contains					rule CHscission occurs 1 times
rule OHadsorption2 occurs 1 times					rule CHscission2 occurs 1 times
rule OHdesorption2 occurs 1 times					rule CHscission7 occurs 1 times
rule OHscission2 occurs 1 times					rule CCscission occurs 1 times
rule CHformation occurs 1 times					rule CdoubleOFromCOH occurs 2 times
rule OHformation2 occurs 1 times					rule CarbonMonoxideFormation occurs 1 times
rule COScission occurs 1 times					Max Ea is			86.0761
Max Ea is			144.359
					C(CO)(CO)O.[{M}].[{M}]>>C(O_[{M}])(CO)CO_[{M}]	-34.9437	0
C(CO)(CO)O.[{M}].[{M}]>>C(O_[{M}])(CO)CO_[{M}]	-34.9437	0			C(O_[{M}])(CO)CO_[{M}].[{M}].[{M}]>>C(C(O_[{M}])CO_[{M}])([{M}])O.[{M}H]	-86.2239	14.2886
C(O_[{M}])(CO)CO_[{M}].[{M}].[{M}]>>C(O_[{M}])(CO[{M}])CO_[{M}].[{M}H]	6.84912	59.9022			C(C(O_[{M}])CO_[{M}])([{M}])O.[{M}].[{M}]>>C(C(O_[{M}])CO_[{M}])(O[{M}])[{M}].[{M}H]	28.2626	78.3178
C(O_[{M}])(CO[{M}])CO_[{M}].[{M}].[{M}]>>C(O_[{M}])(C[{M}])CO_[{M}].O([{M}])[{M}]	-15.6414	167.223			C(C(O_[{M}])CO_[{M}])(O[{M}])[{M}].[{M}].[{M}]>>C(C=O)(CO_[{M}])([{M}])O.[{M}].[{M}].[{M}].[{M}H]	-73.7752	26.9863
C(O_[{M}])(C[{M}])CO_[{M}].[{M}].[{M}]>>C(CO[{M}])(O_[{M}])C[{M}].[{M}].[{M}H]	28.9736	78.9293			C(C=O)(CO_[{M}])([{M}])O.[{M}].[{M}]>>C(C(=O)[{M}])(CO_[{M}])([{M}])O.[{M}H]	-33.6404	67.9238
C(CO[{M}])(O_[{M}])C[{M}].[{M}H]>>C(CO[{M}])(O_[{M}])C.[{M}].[{M}]	35.6979	84.7122			C(C(=O)[{M}])(CO_[{M}])([{M}])O>>C(=O)(C(=O)CO_[{M}])[{M}].[{M}H]	13.7685	65.8529
C(CO[{M}])(O_[{M}])C.[{M}H]>>C(O_[{M}])(CO_[{M}])C.[{M}]	-28.9736	58.0683			C(=O)(C(=O)CO_[{M}])[{M}].[{M}].[{M}]>>C(=O)([{M}])[{M}].C(=O)(CO_[{M}])[{M}]	-101.938	86.0761
C(O_[{M}])(CO_[{M}])C>>C(CO)(O)C.[{M}].[{M}]	36.1986	0			C(=O)([{M}])[{M}]>>O=[C:].[{M}].[{M}]	84.3706	0
the above pathway is of length 7 and contains					the above pathway is of length 8 and contains
rule OHadsorption2 occurs 1 times					rule OHadsorption2 occurs 1 times
rule OHdesorption2 occurs 1 times					rule CHscission occurs 2 times
rule OHscission occurs 1 times					rule CHscission5 occurs 1 times
rule OHscission2 occurs 1 times					rule CCscission occurs 1 times
rule CHformation occurs 1 times					rule OHscission occurs 1 times
rule OHformation2 occurs 1 times					rule CdoubleOFromCOH occurs 1 times
rule COScission occurs 1 times					rule CarbonMonoxideFormation occurs 1 times
Max Ea is			167.223		Max Ea is			86.0761
C(CO)(CO)O.[{M}].[{M}]>>C(O_[{M}])(CO)CO_[{M}]	-34.9437	0			C(CO)(CO)O.[{M}].[{M}]>>C(O_[{M}])(CO)CO_[{M}]	-34.9437	0
C(O_[{M}])(CO)CO_[{M}].[{M}].[{M}]>>C(O_[{M}])(CO[{M}])CO_[{M}].[{M}H]	6.84912	59.9022			C(O_[{M}])(CO)CO_[{M}].[{M}].[{M}]>>C(O_[{M}])(CO[{M}])CO_[{M}].[{M}H]	6.84912	59.9022
C(O_[{M}])(CO[{M}])CO_[{M}].[{M}].[{M}]>>C(O_[{M}])(CO[{M}])CO[{M}].[{M}].[{M}H]	28.9736	78.9293			C(O_[{M}])(CO[{M}])CO_[{M}].[{M}].[{M}]>>C(C(O_[{M}])CO_[{M}])(O[{M}])[{M}].[{M}H]	-64.8105	36.1303
C(O_[{M}])(CO[{M}])CO[{M}].[{M}].[{M}]>>C(CO[{M}])(O_[{M}])C[{M}].O([{M}])[{M}]	-15.6414	167.223			C(C(O_[{M}])CO_[{M}])(O[{M}])[{M}].[{M}].[{M}]>>C(C=O)(CO_[{M}])([{M}])O.[{M}].[{M}].[{M}].[{M}H]	-73.7752	26.9863
C(CO[{M}])(O_[{M}])C[{M}].[{M}H]>>C(CO[{M}])(O_[{M}])C.[{M}].[{M}]	35.6979	84.7122			C(C=O)(CO_[{M}])([{M}])O.[{M}].[{M}]>>C(C(=O)[{M}])(CO_[{M}])([{M}])O.[{M}H]	-33.6404	67.9238
C(CO[{M}])(O_[{M}])C.[{M}H]>>C(O_[{M}])(CO_[{M}])C.[{M}]	-28.9736	58.0683			C(C(=O)[{M}])(CO_[{M}])([{M}])O>>C(=O)(C(=O)CO_[{M}])[{M}].[{M}H]	13.7685	65.8529
C(O_[{M}])(CO_[{M}])C>>C(CO)(O)C.[{M}].[{M}]	36.1986	0			C(=O)(C(=O)CO_[{M}])[{M}].[{M}].[{M}]>>C(=O)([{M}])[{M}].C(=O)(CO_[{M}])[{M}]	-101.938	86.0761
					C(=O)([{M}])[{M}]>>O=[C:].[{M}].[{M}]	84.3706	0
the above pathway is of length 7 and contains
rule OHadsorption2 occurs 1 times					the above pathway is of length 8 and contains
rule OHdesorption2 occurs 1 times					rule OHadsorption2 occurs 1 times
rule OHscission occurs 1 times					rule CHscission occurs 2 times
rule OHscission2 occurs 1 times					rule CHscission5 occurs 1 times
rule CHformation occurs 1 times					rule CCscission occurs 1 times
rule OHformation2 occurs 1 times					rule OHscission occurs 1 times
rule COScission occurs 1 times					rule CdoubleOFromCOH occurs 1 times
Max Ea is			167.223		rule CarbonMonoxideFormation occurs 1 times
					Max Ea is			86.0761
C(CO)(CO)O.[{M}].[{M}]>>C(O_[{M}])(CO)CO_[{M}]	-34.9437	0
C(O_[{M}])(CO)CO_[{M}].[{M}].[{M}]>>C(O[{M}])(CO_[{M}])CO_[{M}].[{M}H]	12.7358	64.9648			C(CO)(CO)O.[{M}].[{M}]>>C(O_[{M}])(CO)CO_[{M}]	-34.9437	0
C(O[{M}])(CO_[{M}])CO_[{M}].[{M}].[{M}]>>C(CO_[{M}])(O[{M}])C[{M}].[{M}]O.[{M}]	31.4513	159.625			C(O_[{M}])(CO)CO_[{M}].[{M}].[{M}]>>C(CO_[{M}])(CO_[{M}])([{M}])O.[{M}H]	-58.1863	42.887
C(CO_[{M}])(O[{M}])C[{M}].[{M}H]>>C(CO_[{M}])(O[{M}])C.[{M}].[{M}]	35.6979	84.7122			C(CO_[{M}])(CO_[{M}])([{M}])O.[{M}].[{M}]>>C(CO[{M}])(CO_[{M}])([{M}])O.[{M}].[{M}H]	28.9736	78.9293
C(CO_[{M}])(O[{M}])C.[{M}H]>>C(O_[{M}])(CO_[{M}])C.[{M}]	-34.8603	58.8924			C(CO[{M}])(CO_[{M}])([{M}])O>>C(C=O)(CO_[{M}])([{M}])O.[{M}H]	-102.524	-2.33734
C(O_[{M}])(CO_[{M}])C>>C(CO)(O)C.[{M}].[{M}]	36.1986	0			C(C=O)(CO_[{M}])([{M}])O.[{M}].[{M}]>>C(C(=O)[{M}])(CO_[{M}])([{M}])O.[{M}H]	-33.6404	67.9238
					C(C(=O)[{M}])(CO_[{M}])([{M}])O>>C(=O)(C(=O)CO_[{M}])[{M}].[{M}H]	13.7685	65.8529
the above pathway is of length 6 and contains					C(=O)(C(=O)CO_[{M}])[{M}].[{M}].[{M}]>>C(=O)([{M}])[{M}].C(=O)(CO_[{M}])[{M}]	-101.938	86.0761
rule OHadsorption2 occurs 1 times					C(=O)([{M}])[{M}]>>O=[C:].[{M}].[{M}]	84.3706	0
rule OHdesorption2 occurs 1 times
rule OHscission4 occurs 1 times					the above pathway is of length 8 and contains
rule CHformation occurs 1 times					rule OHadsorption2 occurs 1 times
rule OHformation2 occurs 1 times					rule CHscission occurs 1 times
rule COScission2 occurs 1 times					rule CHscission7 occurs 1 times
Max Ea is			159.625		rule CCscission occurs 1 times
					rule OHscission2 occurs 1 times
C(CO)(CO)O.[{M}].[{M}]>>C(O_[{M}])(CO)CO_[{M}]	-34.9437	0			rule CdoubleOFormation occurs 1 times
C(O_[{M}])(CO)CO_[{M}].[{M}].[{M}]>>C(O_[{M}])(C[{M}])CO_[{M}].[{M}]O	9.32679	144.359			rule CdoubleOFromCOH occurs 1 times
C(O_[{M}])(C[{M}])CO_[{M}].[{M}].[{M}]>>C(CO_[{M}])(O[{M}])C[{M}].[{M}].[{M}H]	34.8603	83.9919			rule CarbonMonoxideFormation occurs 1 times
C(CO_[{M}])(O[{M}])C[{M}].[{M}H]>>C(CO_[{M}])(O[{M}])C.[{M}].[{M}]	35.6979	84.7122			Max Ea is			86.0761
C(CO_[{M}])(O[{M}])C.[{M}H]>>C(O_[{M}])(CO_[{M}])C.[{M}]	-34.8603	58.8924
C(O_[{M}])(CO_[{M}])C>>C(CO)(O)C.[{M}].[{M}]	36.1986	0			C(CO)(CO)O.[{M}].[{M}]>>C(O_[{M}])(CO)CO_[{M}]	-34.9437	0
					C(O_[{M}])(CO)CO_[{M}].[{M}].[{M}]>>C(O_[{M}])(CO[{M}])CO_[{M}].[{M}H]	6.84912	59.9022
the above pathway is of length 6 and contains					C(O_[{M}])(CO[{M}])CO_[{M}].[{M}].[{M}]>>C(CO[{M}])(CO_[{M}])([{M}])O.[{M}].[{M}H]	-36.0618	65.454
rule OHadsorption2 occurs 1 times					C(CO[{M}])(CO_[{M}])([{M}])O>>C(C=O)(CO_[{M}])([{M}])O.[{M}H]	-102.524	-2.33734
rule OHdesorption2 occurs 1 times					C(C=O)(CO_[{M}])([{M}])O.[{M}].[{M}]>>C(C(=O)[{M}])(CO_[{M}])([{M}])O.[{M}H]	-33.6404	67.9238
rule OHscission2 occurs 1 times					C(C(=O)[{M}])(CO_[{M}])([{M}])O>>C(=O)(C(=O)CO_[{M}])[{M}].[{M}H]	13.7685	65.8529
rule CHformation occurs 1 times					C(=O)(C(=O)CO_[{M}])[{M}].[{M}].[{M}]>>C(=O)([{M}])[{M}].C(=O)(CO_[{M}])[{M}]	-101.938	86.0761
rule OHformation2 occurs 1 times					C(=O)([{M}])[{M}]>>O=[C:].[{M}].[{M}]	84.3706	0
rule COScission occurs 1 times
Max Ea is			144.359		the above pathway is of length 8 and contains
					rule OHadsorption2 occurs 1 times
C(CO)(CO)O.[{M}].[{M}]>>C(O_[{M}])(CO)CO_[{M}]	-34.9437	0			rule CHscission occurs 1 times
C(O_[{M}])(CO)CO_[{M}].[{M}].[{M}]>>C(O_[{M}])(CO[{M}])CO_[{M}].[{M}H]	6.84912	59.9022			rule CHscission2 occurs 1 times
C(O_[{M}])(CO[{M}])CO_[{M}].[{M}].[{M}]>>C(O_[{M}])(C[{M}])CO_[{M}].O([{M}])[{M}]	-15.6414	167.223			rule CCscission occurs 1 times
C(O_[{M}])(C[{M}])CO_[{M}].[{M}].[{M}]>>C(CO_[{M}])(O[{M}])C[{M}].[{M}].[{M}H]	34.8603	83.9919			rule OHscission occurs 1 times
C(CO_[{M}])(O[{M}])C[{M}].[{M}H]>>C(CO_[{M}])(O[{M}])C.[{M}].[{M}]	35.6979	84.7122			rule CdoubleOFormation occurs 1 times
C(CO_[{M}])(O[{M}])C.[{M}H]>>C(O_[{M}])(CO_[{M}])C.[{M}]	-34.8603	58.8924			rule CdoubleOFromCOH occurs 1 times
C(O_[{M}])(CO_[{M}])C>>C(CO)(O)C.[{M}].[{M}]	36.1986	0			rule CarbonMonoxideFormation occurs 1 times
					Max Ea is			86.0761
the above pathway is of length 7 and contains
rule OHadsorption2 occurs 1 times					C(CO)(CO)O.[{M}].[{M}]>>C(O_[{M}])(CO)CO_[{M}]	-34.9437	0
rule OHdesorption2 occurs 1 times					C(O_[{M}])(CO)CO_[{M}].[{M}].[{M}]>>C(C(O_[{M}])CO_[{M}])([{M}])O.[{M}H]	-86.2239	14.2886
rule OHscission occurs 1 times					C(C(O_[{M}])CO_[{M}])([{M}])O.[{M}].[{M}]>>C(C(O_[{M}])CO_[{M}])([{M}])([{M}])O.[{M}H]	-26.883	74.8163
rule OHscission2 occurs 1 times					C(C(O_[{M}])CO_[{M}])([{M}])([{M}])O.[{M}].[{M}]>>C(C(O[{M}])CO_[{M}])([{M}])([{M}])O.[{M}].[{M}H]	34.8603	83.9919
rule CHformation occurs 1 times					C(C(O[{M}])CO_[{M}])([{M}])([{M}])O>>C(=O)(C(CO_[{M}])O[{M}])[{M}].[{M}H]	-29.9239	28.2775
rule OHformation2 occurs 1 times					C(=O)(C(CO_[{M}])O[{M}])[{M}]>>C(=O)(C(=O)CO_[{M}])[{M}].[{M}H]	-43.4379	57.9304
rule COScission occurs 1 times					C(=O)(C(=O)CO_[{M}])[{M}].[{M}].[{M}]>>C(=O)([{M}])[{M}].C(=O)(CO_[{M}])[{M}]	-101.938	86.0761
Max Ea is			167.223		C(=O)([{M}])[{M}]>>O=[C:].[{M}].[{M}]	84.3706	0
C(CO)(CO)O.[{M}].[{M}]>>C(O_[{M}])(CO)CO_[{M}]	-34.9437	0			the above pathway is of length 8 and contains
C(O_[{M}])(CO)CO_[{M}].[{M}].[{M}]>>C(O_[{M}])(CO[{M}])CO_[{M}].[{M}H]	6.84912	59.9022			rule OHadsorption2 occurs 1 times
C(O_[{M}])(CO[{M}])CO_[{M}].[{M}].[{M}]>>C(O[{M}])(CO[{M}])CO_[{M}].[{M}].[{M}H]	34.8603	83.9919			rule CHscission occurs 2 times
C(O[{M}])(CO[{M}])CO_[{M}].[{M}].[{M}]>>C(CO_[{M}])(O[{M}])C[{M}].O([{M}])[{M}]	-15.6414	167.223			rule CCscission occurs 1 times
C(CO_[{M}])(O[{M}])C[{M}].[{M}H]>>C(CO_[{M}])(O[{M}])C.[{M}].[{M}]	35.6979	84.7122			rule OHscission2 occurs 1 times
C(CO_[{M}])(O[{M}])C.[{M}H]>>C(O_[{M}])(CO_[{M}])C.[{M}]	-34.8603	58.8924			rule CdoubleOFormation occurs 1 times
C(O_[{M}])(CO_[{M}])C>>C(CO)(O)C.[{M}].[{M}]	36.1986	0			rule CdoubleOFromCOH occurs 1 times
					rule CarbonMonoxideFormation occurs 1 times
the above pathway is of length 7 and contains					Max Ea is			86.0761
rule OHadsorption2 occurs 1 times
rule OHdesorption2 occurs 1 times					C(CO)(CO)O.[{M}].[{M}]>>C(O_[{M}])(CO)CO_[{M}]	-34.9437	0
rule OHscission occurs 1 times					C(O_[{M}])(CO)CO_[{M}].[{M}].[{M}]>>C(C(O_[{M}])CO_[{M}])([{M}])O.[{M}H]	-86.2239	14.2886
rule OHscission2 occurs 1 times					C(C(O_[{M}])CO_[{M}])([{M}])O.[{M}].[{M}]>>C(C([{M}])O)(CO_[{M}])O[{M}].[{M}].[{M}H]	34.8603	83.9919
rule CHformation occurs 1 times					C(C([{M}])O)(CO_[{M}])O[{M}].[{M}].[{M}]>>C(C(O[{M}])CO_[{M}])([{M}])([{M}])O.[{M}H]	-26.883	74.8163
rule OHformation2 occurs 1 times					C(C(O[{M}])CO_[{M}])([{M}])([{M}])O>>C(=O)(C(CO_[{M}])O[{M}])[{M}].[{M}H]	-29.9239	28.2775
rule COScission occurs 1 times					C(=O)(C(CO_[{M}])O[{M}])[{M}]>>C(=O)(C(=O)CO_[{M}])[{M}].[{M}H]	-43.4379	57.9304
Max Ea is			167.223		C(=O)(C(=O)CO_[{M}])[{M}].[{M}].[{M}]>>C(=O)([{M}])[{M}].C(=O)(CO_[{M}])[{M}]	-101.938	86.0761
					C(=O)([{M}])[{M}]>>O=[C:].[{M}].[{M}]	84.3706	0
C(CO)(CO)O.[{M}].[{M}]>>C(O_[{M}])(CO)CO_[{M}]	-34.9437	0
C(O_[{M}])(CO)CO_[{M}].[{M}].[{M}]>>C(O[{M}])(CO_[{M}])CO_[{M}].[{M}H]	12.7358	64.9648			the above pathway is of length 8 and contains
C(O[{M}])(CO_[{M}])CO_[{M}].[{M}].[{M}]>>C(O[{M}])(CO[{M}])CO_[{M}].[{M}].[{M}H]	28.9736	78.9293			rule OHadsorption2 occurs 1 times
C(O[{M}])(CO[{M}])CO_[{M}].[{M}].[{M}]>>C(CO_[{M}])(O[{M}])C[{M}].O([{M}])[{M}]	-15.6414	167.223			rule CHscission occurs 2 times
C(CO_[{M}])(O[{M}])C[{M}].[{M}H]>>C(CO_[{M}])(O[{M}])C.[{M}].[{M}]	35.6979	84.7122			rule CCscission occurs 1 times
C(CO_[{M}])(O[{M}])C.[{M}H]>>C(O_[{M}])(CO_[{M}])C.[{M}]	-34.8603	58.8924			rule OHscission2 occurs 1 times
C(O_[{M}])(CO_[{M}])C>>C(CO)(O)C.[{M}].[{M}]	36.1986	0			rule CdoubleOFormation occurs 1 times
					rule CdoubleOFromCOH occurs 1 times
the above pathway is of length 7 and contains					rule CarbonMonoxideFormation occurs 1 times
rule OHadsorption2 occurs 1 times					Max Ea is			86.0761
rule OHdesorption2 occurs 1 times
rule OHscission2 occurs 1 times					C(CO)(CO)O.[{M}].[{M}]>>C(O_[{M}])(CO)CO_[{M}]	-34.9437	0
rule OHscission4 occurs 1 times					C(O_[{M}])(CO)CO_[{M}].[{M}].[{M}]>>C(O[{M}])(CO_[{M}])CO_[{M}].[{M}H]	12.7358	64.9648
rule CHformation occurs 1 times					C(O[{M}])(CO_[{M}])CO_[{M}].[{M}].[{M}]>>C(C([{M}])O)(CO_[{M}])O[{M}].[{M}].[{M}H]	-64.0994	36.8556
rule OHformation2 occurs 1 times					C(C([{M}])O)(CO_[{M}])O[{M}].[{M}].[{M}]>>C(C(O[{M}])CO_[{M}])([{M}])([{M}])O.[{M}H]	-26.883	74.8163
rule COScission occurs 1 times					C(C(O[{M}])CO_[{M}])([{M}])([{M}])O>>C(=O)(C(CO_[{M}])O[{M}])[{M}].[{M}H]	-29.9239	28.2775
Max Ea is			167.223		C(=O)(C(CO_[{M}])O[{M}])[{M}]>>C(=O)(C(=O)CO_[{M}])[{M}].[{M}H]	-43.4379	57.9304
					C(=O)(C(=O)CO_[{M}])[{M}].[{M}].[{M}]>>C(=O)([{M}])[{M}].C(=O)(CO_[{M}])[{M}]	-101.938	86.0761
total valid pathways is 32					C(=O)([{M}])[{M}]>>O=[C:].[{M}].[{M}]	84.3706	0
total distinct pathways is 32
2 pathways from C(CO)(CO)O containing					the above pathway is of length 8 and contains
1of rule OHadsorption2					rule OHadsorption2 occurs 1 times
1of rule OHdesorption2					rule CHscission occurs 1 times
1of rule OHscission2					rule CHscission2 occurs 1 times
1of rule CHformation					rule CCscission occurs 1 times
1of rule OHformation2					rule OHscission4 occurs 1 times
1of rule COScission					rule CdoubleOFormation occurs 1 times
					rule CdoubleOFromCOH occurs 1 times
2 pathways from C(CO)(CO)O containing					rule CarbonMonoxideFormation occurs 1 times
1of rule OHadsorption2					Max Ea is			86.0761
1of rule OHdesorption2
1of rule CHscission7					C(CO)(CO)O.[{M}].[{M}]>>C(O_[{M}])(CO)CO_[{M}]	-34.9437	0
1of rule CHformation					C(O_[{M}])(CO)CO_[{M}].[{M}].[{M}]>>C(C(O_[{M}])CO_[{M}])([{M}])O.[{M}H]	-86.2239	14.2886
1of rule CHformation2					C(C(O_[{M}])CO_[{M}])([{M}])O.[{M}].[{M}]>>C(C(O_[{M}])CO_[{M}])([{M}])([{M}])O.[{M}H]	-26.883	74.8163
1of rule COScission2					C(C(O_[{M}])CO_[{M}])([{M}])([{M}])O>>C(=O)(C(O_[{M}])CO_[{M}])[{M}].[{M}H]	-29.9239	28.2775
					C(=O)(C(O_[{M}])CO_[{M}])[{M}].[{M}].[{M}]>>C(=O)(C(CO_[{M}])O[{M}])[{M}].[{M}].[{M}H]	34.8603	83.9919
2 pathways from C(CO)(CO)O containing					C(=O)(C(CO_[{M}])O[{M}])[{M}]>>C(=O)(C(=O)CO_[{M}])[{M}].[{M}H]	-43.4379	57.9304
1of rule OHadsorption2					C(=O)(C(=O)CO_[{M}])[{M}].[{M}].[{M}]>>C(=O)([{M}])[{M}].C(=O)(CO_[{M}])[{M}]	-101.938	86.0761
1of rule OHdesorption2					C(=O)([{M}])[{M}]>>O=[C:].[{M}].[{M}]	84.3706	0
1of rule OHscission4
1of rule CHformation					the above pathway is of length 8 and contains
1of rule OHformation2					rule OHadsorption2 occurs 1 times
1of rule COScission2					rule CHscission occurs 2 times
					rule CCscission occurs 1 times
4 pathways from C(CO)(CO)O containing					rule OHscission2 occurs 1 times
1of rule OHadsorption2					rule CdoubleOFormation occurs 1 times
1of rule OHdesorption2					rule CdoubleOFromCOH occurs 1 times
1of rule CHscission2					rule CarbonMonoxideFormation occurs 1 times
1of rule OHscission					Max Ea is			86.0761
1of rule CHformation
1of rule CHformation2					C(CO)(CO)O.[{M}].[{M}]>>C(O_[{M}])(CO)CO_[{M}]	-34.9437	0
1of rule COScission					C(O_[{M}])(CO)CO_[{M}].[{M}].[{M}]>>C(C(O_[{M}])CO_[{M}])([{M}])O.[{M}H]	-86.2239	14.2886
					C(C(O_[{M}])CO_[{M}])([{M}])O.[{M}].[{M}]>>C(C(O_[{M}])CO_[{M}])(O[{M}])[{M}].[{M}H]	28.2626	78.3178
3 pathways from C(CO)(CO)O containing					C(C(O_[{M}])CO_[{M}])(O[{M}])[{M}].[{M}].[{M}]>>C(=O)(C(O_[{M}])CO_[{M}])[{M}].[{M}].[{M}].[{M}H]	-85.0694	15.4662
1of rule OHadsorption2					C(=O)(C(O_[{M}])CO_[{M}])[{M}].[{M}].[{M}]>>C(=O)(C(CO_[{M}])O[{M}])[{M}].[{M}].[{M}H]	34.8603	83.9919
1of rule OHdesorption2					C(=O)(C(CO_[{M}])O[{M}])[{M}]>>C(=O)(C(=O)CO_[{M}])[{M}].[{M}H]	-43.4379	57.9304
1of rule OHscission2					C(=O)(C(=O)CO_[{M}])[{M}].[{M}].[{M}]>>C(=O)([{M}])[{M}].C(=O)(CO_[{M}])[{M}]	-101.938	86.0761
1of rule OHscission4					C(=O)([{M}])[{M}]>>O=[C:].[{M}].[{M}]	84.3706	0
1of rule CHformation
1of rule OHformation2					the above pathway is of length 8 and contains
1of rule COScission					rule OHadsorption2 occurs 1 times
					rule CHscission occurs 1 times
1 pathways from C(CO)(CO)O containing					rule CHscission4 occurs 1 times
1of rule OHadsorption2					rule CCscission occurs 1 times
1of rule OHdesorption2					rule OHscission occurs 1 times
1of rule CHformation					rule OHscission2 occurs 1 times
1of rule COScission					rule CdoubleOFormation occurs 1 times
					rule CarbonMonoxideFormation occurs 1 times
1 pathways from C(CO)(CO)O containing					Max Ea is			86.0761
1of rule OHadsorption2
1of rule OHdesorption2					C(CO)(CO)O.[{M}].[{M}]>>C(O_[{M}])(CO)CO_[{M}]	-34.9437	0
1of rule OHscission					C(O_[{M}])(CO)CO_[{M}].[{M}].[{M}]>>C(O_[{M}])(CO[{M}])CO_[{M}].[{M}H]	6.84912	59.9022
1of rule CHformation					C(O_[{M}])(CO[{M}])CO_[{M}].[{M}].[{M}]>>C(C(O_[{M}])CO_[{M}])(O[{M}])[{M}].[{M}H]	-64.8105	36.1303
1of rule COScission					C(C(O_[{M}])CO_[{M}])(O[{M}])[{M}].[{M}].[{M}]>>C(=O)(C(O_[{M}])CO_[{M}])[{M}].[{M}].[{M}].[{M}H]	-85.0694	15.4662
					C(=O)(C(O_[{M}])CO_[{M}])[{M}].[{M}].[{M}]>>C(=O)(C(CO_[{M}])O[{M}])[{M}].[{M}].[{M}H]	34.8603	83.9919
2 pathways from C(CO)(CO)O containing					C(=O)(C(CO_[{M}])O[{M}])[{M}]>>C(=O)(C(=O)CO_[{M}])[{M}].[{M}H]	-43.4379	57.9304
1of rule OHadsorption2					C(=O)(C(=O)CO_[{M}])[{M}].[{M}].[{M}]>>C(=O)([{M}])[{M}].C(=O)(CO_[{M}])[{M}]	-101.938	86.0761
1of rule OHdesorption2					C(=O)([{M}])[{M}]>>O=[C:].[{M}].[{M}]	84.3706	0
1of rule CHscission
1of rule CHformation					the above pathway is of length 8 and contains
1of rule CHformation2					rule OHadsorption2 occurs 1 times
1of rule COScission2					rule CHscission occurs 1 times
					rule CHscission4 occurs 1 times
3 pathways from C(CO)(CO)O containing					rule CCscission occurs 1 times
1of rule OHadsorption2					rule OHscission occurs 1 times
1of rule OHdesorption2					rule OHscission2 occurs 1 times
1of rule CHscission					rule CdoubleOFormation occurs 1 times
1of rule OHscission2					rule CarbonMonoxideFormation occurs 1 times
1of rule CHformation					Max Ea is			86.0761
1of rule CHformation2
1of rule COScission					C(CO)(CO)O.[{M}].[{M}]>>C(O_[{M}])(CO)CO_[{M}]	-34.9437	0
					C(O_[{M}])(CO)CO_[{M}].[{M}].[{M}]>>C(C(O_[{M}])CO_[{M}])([{M}])O.[{M}H]	-86.2239	14.2886
2 pathways from C(CO)(CO)O containing					C(C(O_[{M}])CO_[{M}])([{M}])O.[{M}].[{M}]>>C(C(O_[{M}])CO_[{M}])(O[{M}])[{M}].[{M}H]	28.2626	78.3178
1of rule OHadsorption2					C(C(O_[{M}])CO_[{M}])(O[{M}])[{M}]>>C(=O)(C(O_[{M}])CO_[{M}])[{M}].[{M}H]	-85.0694	15.4662
1of rule OHdesorption2					C(=O)(C(O_[{M}])CO_[{M}])[{M}].[{M}].[{M}]>>C(=O)(C(CO_[{M}])O[{M}])[{M}].[{M}].[{M}H]	34.8603	83.9919
1of rule CHscission2					C(=O)(C(CO_[{M}])O[{M}])[{M}]>>C(=O)(C(=O)CO_[{M}])[{M}].[{M}H]	-43.4379	57.9304
1of rule CHformation					C(=O)(C(=O)CO_[{M}])[{M}].[{M}].[{M}]>>C(=O)([{M}])[{M}].C(=O)(CO_[{M}])[{M}]	-101.938	86.0761
1of rule CHformation2					C(=O)([{M}])[{M}]>>O=[C:].[{M}].[{M}]	84.3706	0
1of rule COScission
					the above pathway is of length 8 and contains
1 pathways from C(CO)(CO)O containing					rule OHadsorption2 occurs 1 times
1of rule OHadsorption2					rule CHscission occurs 1 times
1of rule OHdesorption2					rule CCscission occurs 1 times
1of rule CHscission					rule OHscission occurs 1 times
1of rule OHscission					rule OHscission2 occurs 1 times
2of rule CHformation					rule CdoubleOFormation occurs 2 times
1of rule COScission					rule CarbonMonoxideFormation occurs 1 times
					Max Ea is			86.0761
6 pathways from C(CO)(CO)O containing
1of rule OHadsorption2					C(CO)(CO)O.[{M}].[{M}]>>C(O_[{M}])(CO)CO_[{M}]	-34.9437	0
1of rule OHdesorption2					C(O_[{M}])(CO)CO_[{M}].[{M}].[{M}]>>C(O_[{M}])(CO[{M}])CO_[{M}].[{M}H]	6.84912	59.9022
1of rule OHscission					C(O_[{M}])(CO[{M}])CO_[{M}].[{M}].[{M}]>>C(C(O_[{M}])CO_[{M}])(O[{M}])[{M}].[{M}H]	-64.8105	36.1303
1of rule OHscission2					C(C(O_[{M}])CO_[{M}])(O[{M}])[{M}]>>C(=O)(C(O_[{M}])CO_[{M}])[{M}].[{M}H]	-85.0694	15.4662
1of rule CHformation					C(=O)(C(O_[{M}])CO_[{M}])[{M}].[{M}].[{M}]>>C(=O)(C(CO_[{M}])O[{M}])[{M}].[{M}].[{M}H]	34.8603	83.9919
1of rule OHformation2					C(=O)(C(CO_[{M}])O[{M}])[{M}]>>C(=O)(C(=O)CO_[{M}])[{M}].[{M}H]	-43.4379	57.9304
1of rule COScission					C(=O)(C(=O)CO_[{M}])[{M}].[{M}].[{M}]>>C(=O)([{M}])[{M}].C(=O)(CO_[{M}])[{M}]	-101.938	86.0761
					C(=O)([{M}])[{M}]>>O=[C:].[{M}].[{M}]	84.3706	0
1 pathways from C(CO)(CO)O containing
1of rule OHadsorption2					the above pathway is of length 8 and contains
1of rule OHdesorption2					rule OHadsorption2 occurs 1 times
1of rule CHscission7					rule CHscission occurs 1 times
1of rule OHscission2					rule CCscission occurs 1 times
1of rule CHformation					rule OHscission occurs 1 times
1of rule CHformation2					rule OHscission2 occurs 1 times
1of rule COScission					rule CdoubleOFormation occurs 2 times
					rule CarbonMonoxideFormation occurs 1 times
2 pathways from C(CO)(CO)O containing					Max Ea is			86.0761
1of rule OHadsorption2
1of rule OHdesorption2					C(CO)(CO)O.[{M}].[{M}]>>C(O_[{M}])(CO)CO_[{M}]	-34.9437	0
1of rule OHscission					C(O_[{M}])(CO)CO_[{M}].[{M}].[{M}]>>C(C(O_[{M}])CO_[{M}])([{M}])O.[{M}H]	-86.2239	14.2886
1of rule CHformation					C(C(O_[{M}])CO_[{M}])([{M}])O.[{M}].[{M}]>>C(C(O_[{M}])CO_[{M}])(O[{M}])[{M}].[{M}H]	28.2626	78.3178
1of rule OHformation2					C(C(O_[{M}])CO_[{M}])(O[{M}])[{M}].[{M}].[{M}]>>C(C(O[{M}])CO_[{M}])(O[{M}])[{M}].[{M}].[{M}H]	34.8603	83.9919
1of rule COScission2					C(C(O[{M}])CO_[{M}])(O[{M}])[{M}].[{M}].[{M}]>>C(=O)(C(CO_[{M}])O[{M}])[{M}].[{M}].[{M}].[{M}H]	-85.0694	15.4662
					C(=O)(C(CO_[{M}])O[{M}])[{M}]>>C(=O)(C(=O)CO_[{M}])[{M}].[{M}H]	-43.4379	57.9304
					C(=O)(C(=O)CO_[{M}])[{M}].[{M}].[{M}]>>C(=O)([{M}])[{M}].C(=O)(CO_[{M}])[{M}]	-101.938	86.0761
Number of pathways of length 4 is: 1					C(=O)([{M}])[{M}]>>O=[C:].[{M}].[{M}]	84.3706	0
Number of pathways of length 5 is: 1
Number of pathways of length 6 is: 12					the above pathway is of length 8 and contains
Number of pathways of length 7 is: 18					rule OHadsorption2 occurs 1 times
1 molecules satisfied the molecular constraints specified					rule CHscission occurs 1 times
					rule CHscission4 occurs 1 times
					rule CCscission occurs 1 times
					rule OHscission occurs 1 times
					rule OHscission2 occurs 1 times
					rule CdoubleOFormation occurs 1 times
					rule CarbonMonoxideFormation occurs 1 times
					Max Ea is			86.0761
					C(CO)(CO)O.[{M}].[{M}]>>C(O_[{M}])(CO)CO_[{M}]	-34.9437	0
					C(O_[{M}])(CO)CO_[{M}].[{M}].[{M}]>>C(O_[{M}])(CO[{M}])CO_[{M}].[{M}H]	6.84912	59.9022
					C(O_[{M}])(CO[{M}])CO_[{M}].[{M}].[{M}]>>C(C(O_[{M}])CO_[{M}])(O[{M}])[{M}].[{M}H]	-64.8105	36.1303
					C(C(O_[{M}])CO_[{M}])(O[{M}])[{M}].[{M}].[{M}]>>C(C(O[{M}])CO_[{M}])(O[{M}])[{M}].[{M}].[{M}H]	34.8603	83.9919
					C(C(O[{M}])CO_[{M}])(O[{M}])[{M}].[{M}].[{M}]>>C(=O)(C(CO_[{M}])O[{M}])[{M}].[{M}].[{M}].[{M}H]	-85.0694	15.4662
					C(=O)(C(CO_[{M}])O[{M}])[{M}]>>C(=O)(C(=O)CO_[{M}])[{M}].[{M}H]	-43.4379	57.9304
					C(=O)(C(=O)CO_[{M}])[{M}].[{M}].[{M}]>>C(=O)([{M}])[{M}].C(=O)(CO_[{M}])[{M}]	-101.938	86.0761
					C(=O)([{M}])[{M}]>>O=[C:].[{M}].[{M}]	84.3706	0
					the above pathway is of length 8 and contains
					rule OHadsorption2 occurs 1 times
					rule CHscission occurs 1 times
					rule CHscission4 occurs 1 times
					rule CCscission occurs 1 times
					rule OHscission occurs 1 times
					rule OHscission2 occurs 1 times
					rule CdoubleOFormation occurs 1 times
					rule CarbonMonoxideFormation occurs 1 times
					Max Ea is			86.0761
					C(CO)(CO)O.[{M}].[{M}]>>C(O_[{M}])(CO)CO_[{M}]	-34.9437	0
					C(O_[{M}])(CO)CO_[{M}].[{M}].[{M}]>>C(C(O_[{M}])CO_[{M}])([{M}])O.[{M}H]	-86.2239	14.2886
					C(C(O_[{M}])CO_[{M}])([{M}])O.[{M}].[{M}]>>C(C([{M}])O)(CO_[{M}])O[{M}].[{M}].[{M}H]	34.8603	83.9919
					C(C([{M}])O)(CO_[{M}])O[{M}].[{M}].[{M}]>>C(C(O[{M}])CO_[{M}])(O[{M}])[{M}].[{M}H]	28.2626	78.3178
					C(C(O[{M}])CO_[{M}])(O[{M}])[{M}].[{M}].[{M}]>>C(=O)(C(CO_[{M}])O[{M}])[{M}].[{M}].[{M}].[{M}H]	-85.0694	15.4662
					C(=O)(C(CO_[{M}])O[{M}])[{M}]>>C(=O)(C(=O)CO_[{M}])[{M}].[{M}H]	-43.4379	57.9304
					C(=O)(C(=O)CO_[{M}])[{M}].[{M}].[{M}]>>C(=O)([{M}])[{M}].C(=O)(CO_[{M}])[{M}]	-101.938	86.0761
					C(=O)([{M}])[{M}]>>O=[C:].[{M}].[{M}]	84.3706	0
					the above pathway is of length 8 and contains
					rule OHadsorption2 occurs 1 times
					rule CHscission occurs 1 times
					rule CHscission4 occurs 1 times
					rule CCscission occurs 1 times
					rule OHscission occurs 1 times
					rule OHscission2 occurs 1 times
					rule CdoubleOFormation occurs 1 times
					rule CarbonMonoxideFormation occurs 1 times
					Max Ea is			86.0761
					C(CO)(CO)O.[{M}].[{M}]>>C(O_[{M}])(CO)CO_[{M}]	-34.9437	0
					C(O_[{M}])(CO)CO_[{M}].[{M}].[{M}]>>C(O[{M}])(CO_[{M}])CO_[{M}].[{M}H]	12.7358	64.9648
					C(O[{M}])(CO_[{M}])CO_[{M}].[{M}].[{M}]>>C(C([{M}])O)(CO_[{M}])O[{M}].[{M}].[{M}H]	-64.0994	36.8556
					C(C([{M}])O)(CO_[{M}])O[{M}].[{M}].[{M}]>>C(C(O[{M}])CO_[{M}])(O[{M}])[{M}].[{M}H]	28.2626	78.3178
					C(C(O[{M}])CO_[{M}])(O[{M}])[{M}].[{M}].[{M}]>>C(=O)(C(CO_[{M}])O[{M}])[{M}].[{M}].[{M}].[{M}H]	-85.0694	15.4662
					C(=O)(C(CO_[{M}])O[{M}])[{M}]>>C(=O)(C(=O)CO_[{M}])[{M}].[{M}H]	-43.4379	57.9304
					C(=O)(C(=O)CO_[{M}])[{M}].[{M}].[{M}]>>C(=O)([{M}])[{M}].C(=O)(CO_[{M}])[{M}]	-101.938	86.0761
					C(=O)([{M}])[{M}]>>O=[C:].[{M}].[{M}]	84.3706	0
					the above pathway is of length 8 and contains
					rule OHadsorption2 occurs 1 times
					rule CHscission2 occurs 1 times
					rule CHscission4 occurs 1 times
					rule CCscission occurs 1 times
					rule OHscission occurs 1 times
					rule OHscission4 occurs 1 times
					rule CdoubleOFormation occurs 1 times
					rule CarbonMonoxideFormation occurs 1 times
					Max Ea is			86.0761
					C(CO)(CO)O.[{M}].[{M}]>>C(O_[{M}])(CO)CO_[{M}]	-34.9437	0
					C(O_[{M}])(CO)CO_[{M}].[{M}].[{M}]>>C(O_[{M}])(CO[{M}])CO_[{M}].[{M}H]	6.84912	59.9022
					C(O_[{M}])(CO[{M}])CO_[{M}].[{M}].[{M}]>>C(O[{M}])(CO[{M}])CO_[{M}].[{M}].[{M}H]	34.8603	83.9919
					C(O[{M}])(CO[{M}])CO_[{M}].[{M}].[{M}]>>C(C(O[{M}])CO_[{M}])(O[{M}])[{M}].[{M}H]	-64.8105	36.1303
					C(C(O[{M}])CO_[{M}])(O[{M}])[{M}].[{M}].[{M}]>>C(=O)(C(CO_[{M}])O[{M}])[{M}].[{M}].[{M}].[{M}H]	-85.0694	15.4662
					C(=O)(C(CO_[{M}])O[{M}])[{M}]>>C(=O)(C(=O)CO_[{M}])[{M}].[{M}H]	-43.4379	57.9304
					C(=O)(C(=O)CO_[{M}])[{M}].[{M}].[{M}]>>C(=O)([{M}])[{M}].C(=O)(CO_[{M}])[{M}]	-101.938	86.0761
					C(=O)([{M}])[{M}]>>O=[C:].[{M}].[{M}]	84.3706	0
					the above pathway is of length 8 and contains
					rule OHadsorption2 occurs 1 times
					rule CHscission occurs 1 times
					rule CHscission4 occurs 1 times
					rule CCscission occurs 1 times
					rule OHscission occurs 1 times
					rule OHscission2 occurs 1 times
					rule CdoubleOFormation occurs 1 times
					rule CarbonMonoxideFormation occurs 1 times
					Max Ea is			86.0761
					C(CO)(CO)O.[{M}].[{M}]>>C(O_[{M}])(CO)CO_[{M}]	-34.9437	0
					C(O_[{M}])(CO)CO_[{M}].[{M}].[{M}]>>C(O[{M}])(CO_[{M}])CO_[{M}].[{M}H]	12.7358	64.9648
					C(O[{M}])(CO_[{M}])CO_[{M}].[{M}].[{M}]>>C(O[{M}])(CO[{M}])CO_[{M}].[{M}].[{M}H]	28.9736	78.9293
					C(O[{M}])(CO[{M}])CO_[{M}].[{M}].[{M}]>>C(C(O[{M}])CO_[{M}])(O[{M}])[{M}].[{M}H]	-64.8105	36.1303
					C(C(O[{M}])CO_[{M}])(O[{M}])[{M}].[{M}].[{M}]>>C(=O)(C(CO_[{M}])O[{M}])[{M}].[{M}].[{M}].[{M}H]	-85.0694	15.4662
					C(=O)(C(CO_[{M}])O[{M}])[{M}]>>C(=O)(C(=O)CO_[{M}])[{M}].[{M}H]	-43.4379	57.9304
					C(=O)(C(=O)CO_[{M}])[{M}].[{M}].[{M}]>>C(=O)([{M}])[{M}].C(=O)(CO_[{M}])[{M}]	-101.938	86.0761
					C(=O)([{M}])[{M}]>>O=[C:].[{M}].[{M}]	84.3706	0
					the above pathway is of length 8 and contains
					rule OHadsorption2 occurs 1 times
					rule CHscission occurs 1 times
					rule CHscission4 occurs 1 times
					rule CCscission occurs 1 times
					rule OHscission2 occurs 1 times
					rule OHscission4 occurs 1 times
					rule CdoubleOFormation occurs 1 times
					rule CarbonMonoxideFormation occurs 1 times
					Max Ea is			86.0761
					C(CO)(CO)O.[{M}].[{M}]>>C(O_[{M}])(CO)CO_[{M}]	-34.9437	0
					C(O_[{M}])(CO)CO_[{M}].[{M}].[{M}]>>C(C(O_[{M}])CO_[{M}])([{M}])O.[{M}H]	-86.2239	14.2886
					C(C(O_[{M}])CO_[{M}])([{M}])O.[{M}].[{M}]>>C(C(O_[{M}])CO_[{M}])(O[{M}])[{M}].[{M}H]	28.2626	78.3178
					C(C(O_[{M}])CO_[{M}])(O[{M}])[{M}].[{M}].[{M}]>>C(C(O[{M}])CO_[{M}])(O[{M}])[{M}].[{M}].[{M}H]	34.8603	83.9919
					C(C(O[{M}])CO_[{M}])(O[{M}])[{M}]>>C(=O)(C(CO_[{M}])O[{M}])[{M}].[{M}H]	-85.0694	15.4662
					C(=O)(C(CO_[{M}])O[{M}])[{M}]>>C(=O)(C(=O)CO_[{M}])[{M}].[{M}H]	-43.4379	57.9304
					C(=O)(C(=O)CO_[{M}])[{M}].[{M}].[{M}]>>C(=O)([{M}])[{M}].C(=O)(CO_[{M}])[{M}]	-101.938	86.0761
					C(=O)([{M}])[{M}]>>O=[C:].[{M}].[{M}]	84.3706	0
					the above pathway is of length 8 and contains
					rule OHadsorption2 occurs 1 times
					rule CHscission occurs 1 times
					rule CCscission occurs 1 times
					rule OHscission occurs 1 times
					rule OHscission2 occurs 1 times
					rule CdoubleOFormation occurs 2 times
					rule CarbonMonoxideFormation occurs 1 times
					Max Ea is			86.0761
					C(CO)(CO)O.[{M}].[{M}]>>C(O_[{M}])(CO)CO_[{M}]	-34.9437	0
					C(O_[{M}])(CO)CO_[{M}].[{M}].[{M}]>>C(O_[{M}])(CO[{M}])CO_[{M}].[{M}H]	6.84912	59.9022
					C(O_[{M}])(CO[{M}])CO_[{M}].[{M}].[{M}]>>C(C(O_[{M}])CO_[{M}])(O[{M}])[{M}].[{M}H]	-64.8105	36.1303
					C(C(O_[{M}])CO_[{M}])(O[{M}])[{M}].[{M}].[{M}]>>C(C(O[{M}])CO_[{M}])(O[{M}])[{M}].[{M}].[{M}H]	34.8603	83.9919
					C(C(O[{M}])CO_[{M}])(O[{M}])[{M}]>>C(=O)(C(CO_[{M}])O[{M}])[{M}].[{M}H]	-85.0694	15.4662
					C(=O)(C(CO_[{M}])O[{M}])[{M}]>>C(=O)(C(=O)CO_[{M}])[{M}].[{M}H]	-43.4379	57.9304
					C(=O)(C(=O)CO_[{M}])[{M}].[{M}].[{M}]>>C(=O)([{M}])[{M}].C(=O)(CO_[{M}])[{M}]	-101.938	86.0761
					C(=O)([{M}])[{M}]>>O=[C:].[{M}].[{M}]	84.3706	0
					the above pathway is of length 8 and contains
					rule OHadsorption2 occurs 1 times
					rule CHscission occurs 1 times
					rule CCscission occurs 1 times
					rule OHscission occurs 1 times
					rule OHscission2 occurs 1 times
					rule CdoubleOFormation occurs 2 times
					rule CarbonMonoxideFormation occurs 1 times
					Max Ea is			86.0761
					C(CO)(CO)O.[{M}].[{M}]>>C(O_[{M}])(CO)CO_[{M}]	-34.9437	0
					C(O_[{M}])(CO)CO_[{M}].[{M}].[{M}]>>C(C(O_[{M}])CO_[{M}])([{M}])O.[{M}H]	-86.2239	14.2886
					C(C(O_[{M}])CO_[{M}])([{M}])O.[{M}].[{M}]>>C(C([{M}])O)(CO_[{M}])O[{M}].[{M}].[{M}H]	34.8603	83.9919
					C(C([{M}])O)(CO_[{M}])O[{M}].[{M}].[{M}]>>C(C(O[{M}])CO_[{M}])(O[{M}])[{M}].[{M}H]	28.2626	78.3178
					C(C(O[{M}])CO_[{M}])(O[{M}])[{M}]>>C(=O)(C(CO_[{M}])O[{M}])[{M}].[{M}H]	-85.0694	15.4662
					C(=O)(C(CO_[{M}])O[{M}])[{M}]>>C(=O)(C(=O)CO_[{M}])[{M}].[{M}H]	-43.4379	57.9304
					C(=O)(C(=O)CO_[{M}])[{M}].[{M}].[{M}]>>C(=O)([{M}])[{M}].C(=O)(CO_[{M}])[{M}]	-101.938	86.0761
					C(=O)([{M}])[{M}]>>O=[C:].[{M}].[{M}]	84.3706	0
					the above pathway is of length 8 and contains
					rule OHadsorption2 occurs 1 times
					rule CHscission occurs 1 times
					rule CCscission occurs 1 times
					rule OHscission occurs 1 times
					rule OHscission2 occurs 1 times
					rule CdoubleOFormation occurs 2 times
					rule CarbonMonoxideFormation occurs 1 times
					Max Ea is			86.0761
					C(CO)(CO)O.[{M}].[{M}]>>C(O_[{M}])(CO)CO_[{M}]	-34.9437	0
					C(O_[{M}])(CO)CO_[{M}].[{M}].[{M}]>>C(O[{M}])(CO_[{M}])CO_[{M}].[{M}H]	12.7358	64.9648
					C(O[{M}])(CO_[{M}])CO_[{M}].[{M}].[{M}]>>C(C([{M}])O)(CO_[{M}])O[{M}].[{M}].[{M}H]	-64.0994	36.8556
					C(C([{M}])O)(CO_[{M}])O[{M}].[{M}].[{M}]>>C(C(O[{M}])CO_[{M}])(O[{M}])[{M}].[{M}H]	28.2626	78.3178
					C(C(O[{M}])CO_[{M}])(O[{M}])[{M}]>>C(=O)(C(CO_[{M}])O[{M}])[{M}].[{M}H]	-85.0694	15.4662
					C(=O)(C(CO_[{M}])O[{M}])[{M}]>>C(=O)(C(=O)CO_[{M}])[{M}].[{M}H]	-43.4379	57.9304
					C(=O)(C(=O)CO_[{M}])[{M}].[{M}].[{M}]>>C(=O)([{M}])[{M}].C(=O)(CO_[{M}])[{M}]	-101.938	86.0761
					C(=O)([{M}])[{M}]>>O=[C:].[{M}].[{M}]	84.3706	0
					the above pathway is of length 8 and contains
					rule OHadsorption2 occurs 1 times
					rule CHscission2 occurs 1 times
					rule CCscission occurs 1 times
					rule OHscission occurs 1 times
					rule OHscission4 occurs 1 times
					rule CdoubleOFormation occurs 2 times
					rule CarbonMonoxideFormation occurs 1 times
					Max Ea is			86.0761
					C(CO)(CO)O.[{M}].[{M}]>>C(O_[{M}])(CO)CO_[{M}]	-34.9437	0
					C(O_[{M}])(CO)CO_[{M}].[{M}].[{M}]>>C(O_[{M}])(CO[{M}])CO_[{M}].[{M}H]	6.84912	59.9022
					C(O_[{M}])(CO[{M}])CO_[{M}].[{M}].[{M}]>>C(O[{M}])(CO[{M}])CO_[{M}].[{M}].[{M}H]	34.8603	83.9919
					C(O[{M}])(CO[{M}])CO_[{M}].[{M}].[{M}]>>C(C(O[{M}])CO_[{M}])(O[{M}])[{M}].[{M}H]	-64.8105	36.1303
					C(C(O[{M}])CO_[{M}])(O[{M}])[{M}]>>C(=O)(C(CO_[{M}])O[{M}])[{M}].[{M}H]	-85.0694	15.4662
					C(=O)(C(CO_[{M}])O[{M}])[{M}]>>C(=O)(C(=O)CO_[{M}])[{M}].[{M}H]	-43.4379	57.9304
					C(=O)(C(=O)CO_[{M}])[{M}].[{M}].[{M}]>>C(=O)([{M}])[{M}].C(=O)(CO_[{M}])[{M}]	-101.938	86.0761
					C(=O)([{M}])[{M}]>>O=[C:].[{M}].[{M}]	84.3706	0
					the above pathway is of length 8 and contains
					rule OHadsorption2 occurs 1 times
					rule CHscission occurs 1 times
					rule CCscission occurs 1 times
					rule OHscission occurs 1 times
					rule OHscission2 occurs 1 times
					rule CdoubleOFormation occurs 2 times
					rule CarbonMonoxideFormation occurs 1 times
					Max Ea is			86.0761
					C(CO)(CO)O.[{M}].[{M}]>>C(O_[{M}])(CO)CO_[{M}]	-34.9437	0
					C(O_[{M}])(CO)CO_[{M}].[{M}].[{M}]>>C(O[{M}])(CO_[{M}])CO_[{M}].[{M}H]	12.7358	64.9648
					C(O[{M}])(CO_[{M}])CO_[{M}].[{M}].[{M}]>>C(O[{M}])(CO[{M}])CO_[{M}].[{M}].[{M}H]	28.9736	78.9293
					C(O[{M}])(CO[{M}])CO_[{M}].[{M}].[{M}]>>C(C(O[{M}])CO_[{M}])(O[{M}])[{M}].[{M}H]	-64.8105	36.1303
					C(C(O[{M}])CO_[{M}])(O[{M}])[{M}]>>C(=O)(C(CO_[{M}])O[{M}])[{M}].[{M}H]	-85.0694	15.4662
					C(=O)(C(CO_[{M}])O[{M}])[{M}]>>C(=O)(C(=O)CO_[{M}])[{M}].[{M}H]	-43.4379	57.9304
					C(=O)(C(=O)CO_[{M}])[{M}].[{M}].[{M}]>>C(=O)([{M}])[{M}].C(=O)(CO_[{M}])[{M}]	-101.938	86.0761
					C(=O)([{M}])[{M}]>>O=[C:].[{M}].[{M}]	84.3706	0
					the above pathway is of length 8 and contains
					rule OHadsorption2 occurs 1 times
					rule CHscission occurs 1 times
					rule CCscission occurs 1 times
					rule OHscission2 occurs 1 times
					rule OHscission4 occurs 1 times
					rule CdoubleOFormation occurs 2 times
					rule CarbonMonoxideFormation occurs 1 times
					Max Ea is			86.0761
					C(CO)(CO)O.[{M}].[{M}]>>C(O_[{M}])(CO)CO_[{M}]	-34.9437	0
					C(O_[{M}])(CO)CO_[{M}].[{M}].[{M}]>>C(C(O_[{M}])CO_[{M}])([{M}])O.[{M}H]	-86.2239	14.2886
					C(C(O_[{M}])CO_[{M}])([{M}])O.[{M}].[{M}]>>C(C([{M}])O)(CO_[{M}])([{M}])O.[{M}].[{M}H]	-14.6484	87.2957
					C(C([{M}])O)(CO_[{M}])([{M}])O>>C(C=O)(CO_[{M}])([{M}])O.[{M}H]	-30.8643	27.4687
					C(C=O)(CO_[{M}])([{M}])O.[{M}].[{M}]>>C(C=O)(CO_[{M}])(O[{M}])[{M}].[{M}H]	28.2626	78.3178
					C(C=O)(CO_[{M}])(O[{M}])[{M}].[{M}].[{M}]>>C(=O)(C(=O)CO_[{M}])[{M}].[{M}].[{M}].[{M}H]	-48.1344	53.1399
					C(=O)(C(=O)CO_[{M}])[{M}].[{M}].[{M}]>>C(=O)([{M}])[{M}].C(=O)(CO_[{M}])[{M}]	-101.938	86.0761
					C(=O)([{M}])[{M}]>>O=[C:].[{M}].[{M}]	84.3706	0
					the above pathway is of length 8 and contains
					rule OHadsorption2 occurs 1 times
					rule CHscission occurs 1 times
					rule CHscission2 occurs 1 times
					rule CHscission3 occurs 1 times
					rule CCscission occurs 1 times
					rule OHscission occurs 1 times
					rule CdoubleOFromCOH occurs 1 times
					rule CarbonMonoxideFormation occurs 1 times
					Max Ea is			87.2957
					C(CO)(CO)O.[{M}].[{M}]>>C(O_[{M}])(CO)CO_[{M}]	-34.9437	0
					C(O_[{M}])(CO)CO_[{M}].[{M}].[{M}]>>C(CO_[{M}])(CO_[{M}])([{M}])O.[{M}H]	-58.1863	42.887
					C(CO_[{M}])(CO_[{M}])([{M}])O.[{M}].[{M}]>>C(C([{M}])O)(CO_[{M}])([{M}])O.[{M}].[{M}H]	-42.686	58.6973
					C(C([{M}])O)(CO_[{M}])([{M}])O>>C(C=O)(CO_[{M}])([{M}])O.[{M}H]	-30.8643	27.4687
					C(C=O)(CO_[{M}])([{M}])O.[{M}].[{M}]>>C(C=O)(CO_[{M}])(O[{M}])[{M}].[{M}H]	28.2626	78.3178
					C(C=O)(CO_[{M}])(O[{M}])[{M}].[{M}].[{M}]>>C(=O)(C(=O)CO_[{M}])[{M}].[{M}].[{M}].[{M}H]	-48.1344	53.1399
					C(=O)(C(=O)CO_[{M}])[{M}].[{M}].[{M}]>>C(=O)([{M}])[{M}].C(=O)(CO_[{M}])[{M}]	-101.938	86.0761
					C(=O)([{M}])[{M}]>>O=[C:].[{M}].[{M}]	84.3706	0
					the above pathway is of length 8 and contains
					rule OHadsorption2 occurs 1 times
					rule CHscission2 occurs 1 times
					rule CHscission3 occurs 1 times
					rule CHscission7 occurs 1 times
					rule CCscission occurs 1 times
					rule OHscission occurs 1 times
					rule CdoubleOFromCOH occurs 1 times
					rule CarbonMonoxideFormation occurs 1 times
					Max Ea is			86.0761
					C(CO)(CO)O.[{M}].[{M}]>>C(O_[{M}])(CO)CO_[{M}]	-34.9437	0
					C(O_[{M}])(CO)CO_[{M}].[{M}].[{M}]>>C(C(O_[{M}])CO_[{M}])([{M}])O.[{M}H]	-86.2239	14.2886
					C(C(O_[{M}])CO_[{M}])([{M}])O.[{M}].[{M}]>>C(C(O_[{M}])CO_[{M}])(O[{M}])[{M}].[{M}H]	28.2626	78.3178
					C(C(O_[{M}])CO_[{M}])(O[{M}])[{M}].[{M}].[{M}]>>C(C=O)(CO_[{M}])([{M}])O.[{M}].[{M}].[{M}].[{M}H]	-73.7752	26.9863
					C(C=O)(CO_[{M}])([{M}])O.[{M}].[{M}]>>C(C=O)(CO_[{M}])(O[{M}])[{M}].[{M}H]	28.2626	78.3178
					C(C=O)(CO_[{M}])(O[{M}])[{M}].[{M}].[{M}]>>C(=O)(C(=O)CO_[{M}])[{M}].[{M}].[{M}].[{M}H]	-48.1344	53.1399
					C(=O)(C(=O)CO_[{M}])[{M}].[{M}].[{M}]>>C(=O)([{M}])[{M}].C(=O)(CO_[{M}])[{M}]	-101.938	86.0761
					C(=O)([{M}])[{M}]>>O=[C:].[{M}].[{M}]	84.3706	0
					the above pathway is of length 8 and contains
					rule OHadsorption2 occurs 1 times
					rule CHscission occurs 1 times
					rule CHscission3 occurs 1 times
					rule CHscission5 occurs 1 times
					rule CCscission occurs 1 times
					rule OHscission occurs 2 times
					rule CarbonMonoxideFormation occurs 1 times
					Max Ea is			86.0761
					C(CO)(CO)O.[{M}].[{M}]>>C(O_[{M}])(CO)CO_[{M}]	-34.9437	0
					C(O_[{M}])(CO)CO_[{M}].[{M}].[{M}]>>C(O_[{M}])(CO[{M}])CO_[{M}].[{M}H]	6.84912	59.9022
					C(O_[{M}])(CO[{M}])CO_[{M}].[{M}].[{M}]>>C(C(O_[{M}])CO_[{M}])(O[{M}])[{M}].[{M}H]	-64.8105	36.1303
					C(C(O_[{M}])CO_[{M}])(O[{M}])[{M}].[{M}].[{M}]>>C(C=O)(CO_[{M}])([{M}])O.[{M}].[{M}].[{M}].[{M}H]	-73.7752	26.9863
					C(C=O)(CO_[{M}])([{M}])O.[{M}].[{M}]>>C(C=O)(CO_[{M}])(O[{M}])[{M}].[{M}H]	28.2626	78.3178
					C(C=O)(CO_[{M}])(O[{M}])[{M}].[{M}].[{M}]>>C(=O)(C(=O)CO_[{M}])[{M}].[{M}].[{M}].[{M}H]	-48.1344	53.1399
					C(=O)(C(=O)CO_[{M}])[{M}].[{M}].[{M}]>>C(=O)([{M}])[{M}].C(=O)(CO_[{M}])[{M}]	-101.938	86.0761
					C(=O)([{M}])[{M}]>>O=[C:].[{M}].[{M}]	84.3706	0
					the above pathway is of length 8 and contains
					rule OHadsorption2 occurs 1 times
					rule CHscission occurs 1 times
					rule CHscission3 occurs 1 times
					rule CHscission5 occurs 1 times
					rule CCscission occurs 1 times
					rule OHscission occurs 2 times
					rule CarbonMonoxideFormation occurs 1 times
					Max Ea is			86.0761
					C(CO)(CO)O.[{M}].[{M}]>>C(O_[{M}])(CO)CO_[{M}]	-34.9437	0
					C(O_[{M}])(CO)CO_[{M}].[{M}].[{M}]>>C(CO_[{M}])(CO_[{M}])([{M}])O.[{M}H]	-58.1863	42.887
					C(CO_[{M}])(CO_[{M}])([{M}])O.[{M}].[{M}]>>C(CO[{M}])(CO_[{M}])([{M}])O.[{M}].[{M}H]	28.9736	78.9293
					C(CO[{M}])(CO_[{M}])([{M}])O>>C(C=O)(CO_[{M}])([{M}])O.[{M}H]	-102.524	-2.33734
					C(C=O)(CO_[{M}])([{M}])O.[{M}].[{M}]>>C(C=O)(CO_[{M}])(O[{M}])[{M}].[{M}H]	28.2626	78.3178
					C(C=O)(CO_[{M}])(O[{M}])[{M}].[{M}].[{M}]>>C(=O)(C(=O)CO_[{M}])[{M}].[{M}].[{M}].[{M}H]	-48.1344	53.1399
					C(=O)(C(=O)CO_[{M}])[{M}].[{M}].[{M}]>>C(=O)([{M}])[{M}].C(=O)(CO_[{M}])[{M}]	-101.938	86.0761
					C(=O)([{M}])[{M}]>>O=[C:].[{M}].[{M}]	84.3706	0
					the above pathway is of length 8 and contains
					rule OHadsorption2 occurs 1 times
					rule CHscission3 occurs 1 times
					rule CHscission7 occurs 1 times
					rule CCscission occurs 1 times
					rule OHscission occurs 1 times
					rule OHscission2 occurs 1 times
					rule CdoubleOFormation occurs 1 times
					rule CarbonMonoxideFormation occurs 1 times
					Max Ea is			86.0761
					C(CO)(CO)O.[{M}].[{M}]>>C(O_[{M}])(CO)CO_[{M}]	-34.9437	0
					C(O_[{M}])(CO)CO_[{M}].[{M}].[{M}]>>C(O_[{M}])(CO[{M}])CO_[{M}].[{M}H]	6.84912	59.9022
					C(O_[{M}])(CO[{M}])CO_[{M}].[{M}].[{M}]>>C(CO[{M}])(CO_[{M}])([{M}])O.[{M}].[{M}H]	-36.0618	65.454
					C(CO[{M}])(CO_[{M}])([{M}])O>>C(C=O)(CO_[{M}])([{M}])O.[{M}H]	-102.524	-2.33734
					C(C=O)(CO_[{M}])([{M}])O.[{M}].[{M}]>>C(C=O)(CO_[{M}])(O[{M}])[{M}].[{M}H]	28.2626	78.3178
					C(C=O)(CO_[{M}])(O[{M}])[{M}].[{M}].[{M}]>>C(=O)(C(=O)CO_[{M}])[{M}].[{M}].[{M}].[{M}H]	-48.1344	53.1399
					C(=O)(C(=O)CO_[{M}])[{M}].[{M}].[{M}]>>C(=O)([{M}])[{M}].C(=O)(CO_[{M}])[{M}]	-101.938	86.0761
					C(=O)([{M}])[{M}]>>O=[C:].[{M}].[{M}]	84.3706	0
					the above pathway is of length 8 and contains
					rule OHadsorption2 occurs 1 times
					rule CHscission2 occurs 1 times
					rule CHscission3 occurs 1 times
					rule CCscission occurs 1 times
					rule OHscission occurs 2 times
					rule CdoubleOFormation occurs 1 times
					rule CarbonMonoxideFormation occurs 1 times
					Max Ea is			86.0761
					C(CO)(CO)O.[{M}].[{M}]>>C(O_[{M}])(CO)CO_[{M}]	-34.9437	0
					C(O_[{M}])(CO)CO_[{M}].[{M}].[{M}]>>C(C(O_[{M}])CO_[{M}])([{M}])O.[{M}H]	-86.2239	14.2886
					C(C(O_[{M}])CO_[{M}])([{M}])O.[{M}].[{M}]>>C(C(O_[{M}])CO_[{M}])(O[{M}])[{M}].[{M}H]	28.2626	78.3178
					C(C(O_[{M}])CO_[{M}])(O[{M}])[{M}].[{M}].[{M}]>>C(C(O[{M}])CO_[{M}])(O[{M}])[{M}].[{M}].[{M}H]	34.8603	83.9919
					C(C(O[{M}])CO_[{M}])(O[{M}])[{M}].[{M}].[{M}]>>C(C=O)(CO_[{M}])(O[{M}])[{M}].[{M}].[{M}].[{M}H]	-80.3729	20.2566
					C(C=O)(CO_[{M}])(O[{M}])[{M}].[{M}].[{M}]>>C(=O)(C(=O)CO_[{M}])[{M}].[{M}].[{M}].[{M}H]	-48.1344	53.1399
					C(=O)(C(=O)CO_[{M}])[{M}].[{M}].[{M}]>>C(=O)([{M}])[{M}].C(=O)(CO_[{M}])[{M}]	-101.938	86.0761
					C(=O)([{M}])[{M}]>>O=[C:].[{M}].[{M}]	84.3706	0
					the above pathway is of length 8 and contains
					rule OHadsorption2 occurs 1 times
					rule CHscission occurs 1 times
					rule CHscission3 occurs 2 times
					rule CCscission occurs 1 times
					rule OHscission occurs 1 times
					rule OHscission2 occurs 1 times
					rule CarbonMonoxideFormation occurs 1 times
					Max Ea is			86.0761
					C(CO)(CO)O.[{M}].[{M}]>>C(O_[{M}])(CO)CO_[{M}]	-34.9437	0
					C(O_[{M}])(CO)CO_[{M}].[{M}].[{M}]>>C(O_[{M}])(CO[{M}])CO_[{M}].[{M}H]	6.84912	59.9022
					C(O_[{M}])(CO[{M}])CO_[{M}].[{M}].[{M}]>>C(C(O_[{M}])CO_[{M}])(O[{M}])[{M}].[{M}H]	-64.8105	36.1303
					C(C(O_[{M}])CO_[{M}])(O[{M}])[{M}].[{M}].[{M}]>>C(C(O[{M}])CO_[{M}])(O[{M}])[{M}].[{M}].[{M}H]	34.8603	83.9919
					C(C(O[{M}])CO_[{M}])(O[{M}])[{M}].[{M}].[{M}]>>C(C=O)(CO_[{M}])(O[{M}])[{M}].[{M}].[{M}].[{M}H]	-80.3729	20.2566
					C(C=O)(CO_[{M}])(O[{M}])[{M}].[{M}].[{M}]>>C(=O)(C(=O)CO_[{M}])[{M}].[{M}].[{M}].[{M}H]	-48.1344	53.1399
					C(=O)(C(=O)CO_[{M}])[{M}].[{M}].[{M}]>>C(=O)([{M}])[{M}].C(=O)(CO_[{M}])[{M}]	-101.938	86.0761
					C(=O)([{M}])[{M}]>>O=[C:].[{M}].[{M}]	84.3706	0
					the above pathway is of length 8 and contains
					rule OHadsorption2 occurs 1 times
					rule CHscission occurs 1 times
					rule CHscission3 occurs 2 times
					rule CCscission occurs 1 times
					rule OHscission occurs 1 times
					rule OHscission2 occurs 1 times
					rule CarbonMonoxideFormation occurs 1 times
					Max Ea is			86.0761
					C(CO)(CO)O.[{M}].[{M}]>>C(O_[{M}])(CO)CO_[{M}]	-34.9437	0
					C(O_[{M}])(CO)CO_[{M}].[{M}].[{M}]>>C(C(O_[{M}])CO_[{M}])([{M}])O.[{M}H]	-86.2239	14.2886
					C(C(O_[{M}])CO_[{M}])([{M}])O.[{M}].[{M}]>>C(C([{M}])O)(CO_[{M}])O[{M}].[{M}].[{M}H]	34.8603	83.9919
					C(C([{M}])O)(CO_[{M}])O[{M}].[{M}].[{M}]>>C(C(O[{M}])CO_[{M}])(O[{M}])[{M}].[{M}H]	28.2626	78.3178
					C(C(O[{M}])CO_[{M}])(O[{M}])[{M}].[{M}].[{M}]>>C(C=O)(CO_[{M}])(O[{M}])[{M}].[{M}].[{M}].[{M}H]	-80.3729	20.2566
					C(C=O)(CO_[{M}])(O[{M}])[{M}].[{M}].[{M}]>>C(=O)(C(=O)CO_[{M}])[{M}].[{M}].[{M}].[{M}H]	-48.1344	53.1399
					C(=O)(C(=O)CO_[{M}])[{M}].[{M}].[{M}]>>C(=O)([{M}])[{M}].C(=O)(CO_[{M}])[{M}]	-101.938	86.0761
					C(=O)([{M}])[{M}]>>O=[C:].[{M}].[{M}]	84.3706	0
					the above pathway is of length 8 and contains
					rule OHadsorption2 occurs 1 times
					rule CHscission occurs 1 times
					rule CHscission3 occurs 2 times
					rule CCscission occurs 1 times
					rule OHscission occurs 1 times
					rule OHscission2 occurs 1 times
					rule CarbonMonoxideFormation occurs 1 times
					Max Ea is			86.0761
					C(CO)(CO)O.[{M}].[{M}]>>C(O_[{M}])(CO)CO_[{M}]	-34.9437	0
					C(O_[{M}])(CO)CO_[{M}].[{M}].[{M}]>>C(O[{M}])(CO_[{M}])CO_[{M}].[{M}H]	12.7358	64.9648
					C(O[{M}])(CO_[{M}])CO_[{M}].[{M}].[{M}]>>C(C([{M}])O)(CO_[{M}])O[{M}].[{M}].[{M}H]	-64.0994	36.8556
					C(C([{M}])O)(CO_[{M}])O[{M}].[{M}].[{M}]>>C(C(O[{M}])CO_[{M}])(O[{M}])[{M}].[{M}H]	28.2626	78.3178
					C(C(O[{M}])CO_[{M}])(O[{M}])[{M}].[{M}].[{M}]>>C(C=O)(CO_[{M}])(O[{M}])[{M}].[{M}].[{M}].[{M}H]	-80.3729	20.2566
					C(C=O)(CO_[{M}])(O[{M}])[{M}].[{M}].[{M}]>>C(=O)(C(=O)CO_[{M}])[{M}].[{M}].[{M}].[{M}H]	-48.1344	53.1399
					C(=O)(C(=O)CO_[{M}])[{M}].[{M}].[{M}]>>C(=O)([{M}])[{M}].C(=O)(CO_[{M}])[{M}]	-101.938	86.0761
					C(=O)([{M}])[{M}]>>O=[C:].[{M}].[{M}]	84.3706	0
					the above pathway is of length 8 and contains
					rule OHadsorption2 occurs 1 times
					rule CHscission2 occurs 1 times
					rule CHscission3 occurs 2 times
					rule CCscission occurs 1 times
					rule OHscission occurs 1 times
					rule OHscission4 occurs 1 times
					rule CarbonMonoxideFormation occurs 1 times
					Max Ea is			86.0761
					C(CO)(CO)O.[{M}].[{M}]>>C(O_[{M}])(CO)CO_[{M}]	-34.9437	0
					C(O_[{M}])(CO)CO_[{M}].[{M}].[{M}]>>C(O_[{M}])(CO[{M}])CO_[{M}].[{M}H]	6.84912	59.9022
					C(O_[{M}])(CO[{M}])CO_[{M}].[{M}].[{M}]>>C(O[{M}])(CO[{M}])CO_[{M}].[{M}].[{M}H]	34.8603	83.9919
					C(O[{M}])(CO[{M}])CO_[{M}].[{M}].[{M}]>>C(C(O[{M}])CO_[{M}])(O[{M}])[{M}].[{M}H]	-64.8105	36.1303
					C(C(O[{M}])CO_[{M}])(O[{M}])[{M}].[{M}].[{M}]>>C(C=O)(CO_[{M}])(O[{M}])[{M}].[{M}].[{M}].[{M}H]	-80.3729	20.2566
					C(C=O)(CO_[{M}])(O[{M}])[{M}].[{M}].[{M}]>>C(=O)(C(=O)CO_[{M}])[{M}].[{M}].[{M}].[{M}H]	-48.1344	53.1399
					C(=O)(C(=O)CO_[{M}])[{M}].[{M}].[{M}]>>C(=O)([{M}])[{M}].C(=O)(CO_[{M}])[{M}]	-101.938	86.0761
					C(=O)([{M}])[{M}]>>O=[C:].[{M}].[{M}]	84.3706	0
					the above pathway is of length 8 and contains
					rule OHadsorption2 occurs 1 times
					rule CHscission occurs 1 times
					rule CHscission3 occurs 2 times
					rule CCscission occurs 1 times
					rule OHscission occurs 1 times
					rule OHscission2 occurs 1 times
					rule CarbonMonoxideFormation occurs 1 times
					Max Ea is			86.0761
					C(CO)(CO)O.[{M}].[{M}]>>C(O_[{M}])(CO)CO_[{M}]	-34.9437	0
					C(O_[{M}])(CO)CO_[{M}].[{M}].[{M}]>>C(O[{M}])(CO_[{M}])CO_[{M}].[{M}H]	12.7358	64.9648
					C(O[{M}])(CO_[{M}])CO_[{M}].[{M}].[{M}]>>C(O[{M}])(CO[{M}])CO_[{M}].[{M}].[{M}H]	28.9736	78.9293
					C(O[{M}])(CO[{M}])CO_[{M}].[{M}].[{M}]>>C(C(O[{M}])CO_[{M}])(O[{M}])[{M}].[{M}H]	-64.8105	36.1303
					C(C(O[{M}])CO_[{M}])(O[{M}])[{M}].[{M}].[{M}]>>C(C=O)(CO_[{M}])(O[{M}])[{M}].[{M}].[{M}].[{M}H]	-80.3729	20.2566
					C(C=O)(CO_[{M}])(O[{M}])[{M}].[{M}].[{M}]>>C(=O)(C(=O)CO_[{M}])[{M}].[{M}].[{M}].[{M}H]	-48.1344	53.1399
					C(=O)(C(=O)CO_[{M}])[{M}].[{M}].[{M}]>>C(=O)([{M}])[{M}].C(=O)(CO_[{M}])[{M}]	-101.938	86.0761
					C(=O)([{M}])[{M}]>>O=[C:].[{M}].[{M}]	84.3706	0
					the above pathway is of length 8 and contains
					rule OHadsorption2 occurs 1 times
					rule CHscission occurs 1 times
					rule CHscission3 occurs 2 times
					rule CCscission occurs 1 times
					rule OHscission2 occurs 1 times
					rule OHscission4 occurs 1 times
					rule CarbonMonoxideFormation occurs 1 times
					Max Ea is			86.0761
					C(CO)(CO)O.[{M}].[{M}]>>C(O_[{M}])(CO)CO_[{M}]	-34.9437	0
					C(O_[{M}])(CO)CO_[{M}].[{M}].[{M}]>>C(CO_[{M}])(CO_[{M}])([{M}])O.[{M}H]	-58.1863	42.887
					C(CO_[{M}])(CO_[{M}])([{M}])O.[{M}].[{M}]>>C(O[{M}])(CO_[{M}])(CO_[{M}])[{M}].[{M}H]	28.2626	78.3178
					C(O[{M}])(CO_[{M}])(CO_[{M}])[{M}].[{M}].[{M}]>>C(O[{M}])(CO[{M}])(CO_[{M}])[{M}].[{M}].[{M}H]	28.9736	78.9293
					C(O[{M}])(CO[{M}])(CO_[{M}])[{M}]>>C(C=O)(CO_[{M}])(O[{M}])[{M}].[{M}H]	-102.524	-2.33734
					C(C=O)(CO_[{M}])(O[{M}])[{M}].[{M}].[{M}]>>C(=O)(C(=O)CO_[{M}])[{M}].[{M}].[{M}].[{M}H]	-48.1344	53.1399
					C(=O)(C(=O)CO_[{M}])[{M}].[{M}].[{M}]>>C(=O)([{M}])[{M}].C(=O)(CO_[{M}])[{M}]	-101.938	86.0761
					C(=O)([{M}])[{M}]>>O=[C:].[{M}].[{M}]	84.3706	0
					the above pathway is of length 8 and contains
					rule OHadsorption2 occurs 1 times
					rule CHscission3 occurs 1 times
					rule CHscission7 occurs 1 times
					rule CCscission occurs 1 times
					rule OHscission occurs 1 times
					rule OHscission2 occurs 1 times
					rule CdoubleOFormation occurs 1 times
					rule CarbonMonoxideFormation occurs 1 times
					Max Ea is			86.0761
					C(CO)(CO)O.[{M}].[{M}]>>C(O_[{M}])(CO)CO_[{M}]	-34.9437	0
					C(O_[{M}])(CO)CO_[{M}].[{M}].[{M}]>>C(O[{M}])(CO_[{M}])CO_[{M}].[{M}H]	12.7358	64.9648
					C(O[{M}])(CO_[{M}])CO_[{M}].[{M}].[{M}]>>C(O[{M}])(CO_[{M}])(CO_[{M}])[{M}].[{M}H]	-42.6595	58.7243
					C(O[{M}])(CO_[{M}])(CO_[{M}])[{M}].[{M}].[{M}]>>C(O[{M}])(CO[{M}])(CO_[{M}])[{M}].[{M}].[{M}H]	28.9736	78.9293
					C(O[{M}])(CO[{M}])(CO_[{M}])[{M}]>>C(C=O)(CO_[{M}])(O[{M}])[{M}].[{M}H]	-102.524	-2.33734
					C(C=O)(CO_[{M}])(O[{M}])[{M}].[{M}].[{M}]>>C(=O)(C(=O)CO_[{M}])[{M}].[{M}].[{M}].[{M}H]	-48.1344	53.1399
					C(=O)(C(=O)CO_[{M}])[{M}].[{M}].[{M}]>>C(=O)([{M}])[{M}].C(=O)(CO_[{M}])[{M}]	-101.938	86.0761
					C(=O)([{M}])[{M}]>>O=[C:].[{M}].[{M}]	84.3706	0
					the above pathway is of length 8 and contains
					rule OHadsorption2 occurs 1 times
					rule CHscission occurs 1 times
					rule CHscission3 occurs 1 times
					rule CCscission occurs 1 times
					rule OHscission2 occurs 1 times
					rule OHscission4 occurs 1 times
					rule CdoubleOFormation occurs 1 times
					rule CarbonMonoxideFormation occurs 1 times
					Max Ea is			86.0761
					C(CO)(CO)O.[{M}].[{M}]>>C(O_[{M}])(CO)CO_[{M}]	-34.9437	0
					C(O_[{M}])(CO)CO_[{M}].[{M}].[{M}]>>C(CO_[{M}])(CO_[{M}])([{M}])O.[{M}H]	-58.1863	42.887
					C(CO_[{M}])(CO_[{M}])([{M}])O.[{M}].[{M}]>>C(CO[{M}])(CO_[{M}])([{M}])O.[{M}].[{M}H]	28.9736	78.9293
					C(CO[{M}])(CO_[{M}])([{M}])O.[{M}].[{M}]>>C(O[{M}])(CO[{M}])(CO_[{M}])[{M}].[{M}H]	28.2626	78.3178
					C(O[{M}])(CO[{M}])(CO_[{M}])[{M}]>>C(C=O)(CO_[{M}])(O[{M}])[{M}].[{M}H]	-102.524	-2.33734
					C(C=O)(CO_[{M}])(O[{M}])[{M}].[{M}].[{M}]>>C(=O)(C(=O)CO_[{M}])[{M}].[{M}].[{M}].[{M}H]	-48.1344	53.1399
					C(=O)(C(=O)CO_[{M}])[{M}].[{M}].[{M}]>>C(=O)([{M}])[{M}].C(=O)(CO_[{M}])[{M}]	-101.938	86.0761
					C(=O)([{M}])[{M}]>>O=[C:].[{M}].[{M}]	84.3706	0
					the above pathway is of length 8 and contains
					rule OHadsorption2 occurs 1 times
					rule CHscission3 occurs 1 times
					rule CHscission7 occurs 1 times
					rule CCscission occurs 1 times
					rule OHscission occurs 1 times
					rule OHscission2 occurs 1 times
					rule CdoubleOFormation occurs 1 times
					rule CarbonMonoxideFormation occurs 1 times
					Max Ea is			86.0761
					C(CO)(CO)O.[{M}].[{M}]>>C(O_[{M}])(CO)CO_[{M}]	-34.9437	0
					C(O_[{M}])(CO)CO_[{M}].[{M}].[{M}]>>C(O_[{M}])(CO[{M}])CO_[{M}].[{M}H]	6.84912	59.9022
					C(O_[{M}])(CO[{M}])CO_[{M}].[{M}].[{M}]>>C(CO[{M}])(CO_[{M}])([{M}])O.[{M}].[{M}H]	-36.0618	65.454
					C(CO[{M}])(CO_[{M}])([{M}])O.[{M}].[{M}]>>C(O[{M}])(CO[{M}])(CO_[{M}])[{M}].[{M}H]	28.2626	78.3178
					C(O[{M}])(CO[{M}])(CO_[{M}])[{M}]>>C(C=O)(CO_[{M}])(O[{M}])[{M}].[{M}H]	-102.524	-2.33734
					C(C=O)(CO_[{M}])(O[{M}])[{M}].[{M}].[{M}]>>C(=O)(C(=O)CO_[{M}])[{M}].[{M}].[{M}].[{M}H]	-48.1344	53.1399
					C(=O)(C(=O)CO_[{M}])[{M}].[{M}].[{M}]>>C(=O)([{M}])[{M}].C(=O)(CO_[{M}])[{M}]	-101.938	86.0761
					C(=O)([{M}])[{M}]>>O=[C:].[{M}].[{M}]	84.3706	0
					the above pathway is of length 8 and contains
					rule OHadsorption2 occurs 1 times
					rule CHscission2 occurs 1 times
					rule CHscission3 occurs 1 times
					rule CCscission occurs 1 times
					rule OHscission occurs 2 times
					rule CdoubleOFormation occurs 1 times
					rule CarbonMonoxideFormation occurs 1 times
					Max Ea is			86.0761
					C(CO)(CO)O.[{M}].[{M}]>>C(O_[{M}])(CO)CO_[{M}]	-34.9437	0
					C(O_[{M}])(CO)CO_[{M}].[{M}].[{M}]>>C(O_[{M}])(CO[{M}])CO_[{M}].[{M}H]	6.84912	59.9022
					C(O_[{M}])(CO[{M}])CO_[{M}].[{M}].[{M}]>>C(O[{M}])(CO[{M}])CO_[{M}].[{M}].[{M}H]	34.8603	83.9919
					C(O[{M}])(CO[{M}])CO_[{M}].[{M}].[{M}]>>C(O[{M}])(CO[{M}])(CO_[{M}])[{M}].[{M}H]	-42.6595	58.7243
					C(O[{M}])(CO[{M}])(CO_[{M}])[{M}]>>C(C=O)(CO_[{M}])(O[{M}])[{M}].[{M}H]	-102.524	-2.33734
					C(C=O)(CO_[{M}])(O[{M}])[{M}].[{M}].[{M}]>>C(=O)(C(=O)CO_[{M}])[{M}].[{M}].[{M}].[{M}H]	-48.1344	53.1399
					C(=O)(C(=O)CO_[{M}])[{M}].[{M}].[{M}]>>C(=O)([{M}])[{M}].C(=O)(CO_[{M}])[{M}]	-101.938	86.0761
					C(=O)([{M}])[{M}]>>O=[C:].[{M}].[{M}]	84.3706	0
					the above pathway is of length 8 and contains
					rule OHadsorption2 occurs 1 times
					rule CHscission occurs 1 times
					rule CHscission3 occurs 1 times
					rule CCscission occurs 1 times
					rule OHscission occurs 1 times
					rule OHscission2 occurs 1 times
					rule CdoubleOFormation occurs 1 times
					rule CarbonMonoxideFormation occurs 1 times
					Max Ea is			86.0761
					C(CO)(CO)O.[{M}].[{M}]>>C(O_[{M}])(CO)CO_[{M}]	-34.9437	0
					C(O_[{M}])(CO)CO_[{M}].[{M}].[{M}]>>C(O[{M}])(CO_[{M}])CO_[{M}].[{M}H]	12.7358	64.9648
					C(O[{M}])(CO_[{M}])CO_[{M}].[{M}].[{M}]>>C(O[{M}])(CO[{M}])CO_[{M}].[{M}].[{M}H]	28.9736	78.9293
					C(O[{M}])(CO[{M}])CO_[{M}].[{M}].[{M}]>>C(O[{M}])(CO[{M}])(CO_[{M}])[{M}].[{M}H]	-42.6595	58.7243
					C(O[{M}])(CO[{M}])(CO_[{M}])[{M}]>>C(C=O)(CO_[{M}])(O[{M}])[{M}].[{M}H]	-102.524	-2.33734
					C(C=O)(CO_[{M}])(O[{M}])[{M}].[{M}].[{M}]>>C(=O)(C(=O)CO_[{M}])[{M}].[{M}].[{M}].[{M}H]	-48.1344	53.1399
					C(=O)(C(=O)CO_[{M}])[{M}].[{M}].[{M}]>>C(=O)([{M}])[{M}].C(=O)(CO_[{M}])[{M}]	-101.938	86.0761
					C(=O)([{M}])[{M}]>>O=[C:].[{M}].[{M}]	84.3706	0
					the above pathway is of length 8 and contains
					rule OHadsorption2 occurs 1 times
					rule CHscission occurs 1 times
					rule CHscission3 occurs 1 times
					rule CCscission occurs 1 times
					rule OHscission2 occurs 1 times
					rule OHscission4 occurs 1 times
					rule CdoubleOFormation occurs 1 times
					rule CarbonMonoxideFormation occurs 1 times
					Max Ea is			86.0761
					C(CO)(CO)O.[{M}].[{M}]>>C(O_[{M}])(CO)CO_[{M}]	-34.9437	0
					C(O_[{M}])(CO)CO_[{M}].[{M}].[{M}]>>C(C(O_[{M}])CO_[{M}])([{M}])O.[{M}H]	-86.2239	14.2886
					C(C(O_[{M}])CO_[{M}])([{M}])O.[{M}].[{M}]>>C(C([{M}])O)(CO_[{M}])([{M}])O.[{M}].[{M}H]	-14.6484	87.2957
					C(C([{M}])O)(CO_[{M}])([{M}])O>>C(=O)(C([{M}])O)CO_[{M}].[{M}H]	2.06501	55.7879
					C(=O)(C([{M}])O)CO_[{M}].[{M}].[{M}]>>C(=O)(C(O[{M}])[{M}])CO_[{M}].[{M}H]	28.2626	78.3178
					C(=O)(C(O[{M}])[{M}])CO_[{M}].[{M}].[{M}]>>C(=O)(C(=O)CO_[{M}])[{M}].[{M}].[{M}].[{M}H]	-81.0637	19.5521
					C(=O)(C(=O)CO_[{M}])[{M}].[{M}].[{M}]>>C(=O)([{M}])[{M}].C(=O)(CO_[{M}])[{M}]	-101.938	86.0761
					C(=O)([{M}])[{M}]>>O=[C:].[{M}].[{M}]	84.3706	0
					the above pathway is of length 8 and contains
					rule OHadsorption2 occurs 1 times
					rule CHscission occurs 1 times
					rule CHscission2 occurs 1 times
					rule CHscission4 occurs 1 times
					rule CCscission occurs 1 times
					rule OHscission occurs 1 times
					rule CdoubleOFromCOH occurs 1 times
					rule CarbonMonoxideFormation occurs 1 times
					Max Ea is			87.2957
					C(CO)(CO)O.[{M}].[{M}]>>C(O_[{M}])(CO)CO_[{M}]	-34.9437	0
					C(O_[{M}])(CO)CO_[{M}].[{M}].[{M}]>>C(CO_[{M}])(CO_[{M}])([{M}])O.[{M}H]	-58.1863	42.887
					C(CO_[{M}])(CO_[{M}])([{M}])O.[{M}].[{M}]>>C(C([{M}])O)(CO_[{M}])([{M}])O.[{M}].[{M}H]	-42.686	58.6973
					C(C([{M}])O)(CO_[{M}])([{M}])O>>C(=O)(C([{M}])O)CO_[{M}].[{M}H]	2.06501	55.7879
					C(=O)(C([{M}])O)CO_[{M}].[{M}].[{M}]>>C(=O)(C(O[{M}])[{M}])CO_[{M}].[{M}H]	28.2626	78.3178
					C(=O)(C(O[{M}])[{M}])CO_[{M}].[{M}].[{M}]>>C(=O)(C(=O)CO_[{M}])[{M}].[{M}].[{M}].[{M}H]	-81.0637	19.5521
					C(=O)(C(=O)CO_[{M}])[{M}].[{M}].[{M}]>>C(=O)([{M}])[{M}].C(=O)(CO_[{M}])[{M}]	-101.938	86.0761
					C(=O)([{M}])[{M}]>>O=[C:].[{M}].[{M}]	84.3706	0
					the above pathway is of length 8 and contains
					rule OHadsorption2 occurs 1 times
					rule CHscission2 occurs 1 times
					rule CHscission4 occurs 1 times
					rule CHscission7 occurs 1 times
					rule CCscission occurs 1 times
					rule OHscission occurs 1 times
					rule CdoubleOFromCOH occurs 1 times
					rule CarbonMonoxideFormation occurs 1 times
					Max Ea is			86.0761
					C(CO)(CO)O.[{M}].[{M}]>>C(O_[{M}])(CO)CO_[{M}]	-34.9437	0
					C(O_[{M}])(CO)CO_[{M}].[{M}].[{M}]>>C(C(O_[{M}])CO_[{M}])([{M}])O.[{M}H]	-86.2239	14.2886
					C(C(O_[{M}])CO_[{M}])([{M}])O.[{M}].[{M}]>>C(C([{M}])O)(CO_[{M}])O[{M}].[{M}].[{M}H]	34.8603	83.9919
					C(C([{M}])O)(CO_[{M}])O[{M}]>>C(=O)(C([{M}])O)CO_[{M}].[{M}H]	-47.4437	53.8445
					C(=O)(C([{M}])O)CO_[{M}].[{M}].[{M}]>>C(=O)(C(O[{M}])[{M}])CO_[{M}].[{M}H]	28.2626	78.3178
					C(=O)(C(O[{M}])[{M}])CO_[{M}].[{M}].[{M}]>>C(=O)(C(=O)CO_[{M}])[{M}].[{M}].[{M}].[{M}H]	-81.0637	19.5521
					C(=O)(C(=O)CO_[{M}])[{M}].[{M}].[{M}]>>C(=O)([{M}])[{M}].C(=O)(CO_[{M}])[{M}]	-101.938	86.0761
					C(=O)([{M}])[{M}]>>O=[C:].[{M}].[{M}]	84.3706	0
					the above pathway is of length 8 and contains
					rule OHadsorption2 occurs 1 times
					rule CHscission occurs 1 times
					rule CHscission4 occurs 1 times
					rule CCscission occurs 1 times
					rule OHscission occurs 1 times
					rule OHscission2 occurs 1 times
					rule CdoubleOFormation occurs 1 times
					rule CarbonMonoxideFormation occurs 1 times
					Max Ea is			86.0761
					C(CO)(CO)O.[{M}].[{M}]>>C(O_[{M}])(CO)CO_[{M}]	-34.9437	0
					C(O_[{M}])(CO)CO_[{M}].[{M}].[{M}]>>C(O[{M}])(CO_[{M}])CO_[{M}].[{M}H]	12.7358	64.9648
					C(O[{M}])(CO_[{M}])CO_[{M}].[{M}].[{M}]>>C(C([{M}])O)(CO_[{M}])O[{M}].[{M}].[{M}H]	-64.0994	36.8556
					C(C([{M}])O)(CO_[{M}])O[{M}]>>C(=O)(C([{M}])O)CO_[{M}].[{M}H]	-47.4437	53.8445
					C(=O)(C([{M}])O)CO_[{M}].[{M}].[{M}]>>C(=O)(C(O[{M}])[{M}])CO_[{M}].[{M}H]	28.2626	78.3178
					C(=O)(C(O[{M}])[{M}])CO_[{M}].[{M}].[{M}]>>C(=O)(C(=O)CO_[{M}])[{M}].[{M}].[{M}].[{M}H]	-81.0637	19.5521
					C(=O)(C(=O)CO_[{M}])[{M}].[{M}].[{M}]>>C(=O)([{M}])[{M}].C(=O)(CO_[{M}])[{M}]	-101.938	86.0761
					C(=O)([{M}])[{M}]>>O=[C:].[{M}].[{M}]	84.3706	0
					the above pathway is of length 8 and contains
					rule OHadsorption2 occurs 1 times
					rule CHscission2 occurs 1 times
					rule CHscission4 occurs 1 times
					rule CCscission occurs 1 times
					rule OHscission occurs 1 times
					rule OHscission4 occurs 1 times
					rule CdoubleOFormation occurs 1 times
					rule CarbonMonoxideFormation occurs 1 times
					Max Ea is			86.0761
					C(CO)(CO)O.[{M}].[{M}]>>C(O_[{M}])(CO)CO_[{M}]	-34.9437	0
					C(O_[{M}])(CO)CO_[{M}].[{M}].[{M}]>>C(CO_[{M}])(CO_[{M}])([{M}])O.[{M}H]	-58.1863	42.887
					C(CO_[{M}])(CO_[{M}])([{M}])O.[{M}].[{M}]>>C(O[{M}])(CO_[{M}])(CO_[{M}])[{M}].[{M}H]	28.2626	78.3178
					C(O[{M}])(CO_[{M}])(CO_[{M}])[{M}].[{M}].[{M}]>>C(=O)(C([{M}])O)CO_[{M}].[{M}].[{M}].[{M}].[{M}H]	-68.8835	31.9758
					C(=O)(C([{M}])O)CO_[{M}].[{M}].[{M}]>>C(=O)(C(O[{M}])[{M}])CO_[{M}].[{M}H]	28.2626	78.3178
					C(=O)(C(O[{M}])[{M}])CO_[{M}].[{M}].[{M}]>>C(=O)(C(=O)CO_[{M}])[{M}].[{M}].[{M}].[{M}H]	-81.0637	19.5521
					C(=O)(C(=O)CO_[{M}])[{M}].[{M}].[{M}]>>C(=O)([{M}])[{M}].C(=O)(CO_[{M}])[{M}]	-101.938	86.0761
					C(=O)([{M}])[{M}]>>O=[C:].[{M}].[{M}]	84.3706	0
					the above pathway is of length 8 and contains
					rule OHadsorption2 occurs 1 times
					rule CHscission4 occurs 1 times
					rule CHscission5 occurs 1 times
					rule CHscission7 occurs 1 times
					rule CCscission occurs 1 times
					rule OHscission occurs 2 times
					rule CarbonMonoxideFormation occurs 1 times
					Max Ea is			86.0761
					C(CO)(CO)O.[{M}].[{M}]>>C(O_[{M}])(CO)CO_[{M}]	-34.9437	0
					C(O_[{M}])(CO)CO_[{M}].[{M}].[{M}]>>C(O[{M}])(CO_[{M}])CO_[{M}].[{M}H]	12.7358	64.9648
					C(O[{M}])(CO_[{M}])CO_[{M}].[{M}].[{M}]>>C(O[{M}])(CO_[{M}])(CO_[{M}])[{M}].[{M}H]	-42.6595	58.7243
					C(O[{M}])(CO_[{M}])(CO_[{M}])[{M}].[{M}].[{M}]>>C(=O)(C([{M}])O)CO_[{M}].[{M}].[{M}].[{M}].[{M}H]	-68.8835	31.9758
					C(=O)(C([{M}])O)CO_[{M}].[{M}].[{M}]>>C(=O)(C(O[{M}])[{M}])CO_[{M}].[{M}H]	28.2626	78.3178
					C(=O)(C(O[{M}])[{M}])CO_[{M}].[{M}].[{M}]>>C(=O)(C(=O)CO_[{M}])[{M}].[{M}].[{M}].[{M}H]	-81.0637	19.5521
					C(=O)(C(=O)CO_[{M}])[{M}].[{M}].[{M}]>>C(=O)([{M}])[{M}].C(=O)(CO_[{M}])[{M}]	-101.938	86.0761
					C(=O)([{M}])[{M}]>>O=[C:].[{M}].[{M}]	84.3706	0
					the above pathway is of length 8 and contains
					rule OHadsorption2 occurs 1 times
					rule CHscission occurs 1 times
					rule CHscission4 occurs 1 times
					rule CHscission5 occurs 1 times
					rule CCscission occurs 1 times
					rule OHscission occurs 1 times
					rule OHscission4 occurs 1 times
					rule CarbonMonoxideFormation occurs 1 times
					Max Ea is			86.0761
					C(CO)(CO)O.[{M}].[{M}]>>C(O_[{M}])(CO)CO_[{M}]	-34.9437	0
					C(O_[{M}])(CO)CO_[{M}].[{M}].[{M}]>>C(C(O_[{M}])CO_[{M}])([{M}])O.[{M}H]	-86.2239	14.2886
					C(C(O_[{M}])CO_[{M}])([{M}])O.[{M}].[{M}]>>C(C(O_[{M}])CO_[{M}])(O[{M}])[{M}].[{M}H]	28.2626	78.3178
					C(C(O_[{M}])CO_[{M}])(O[{M}])[{M}].[{M}].[{M}]>>C(C(O[{M}])CO_[{M}])(O[{M}])[{M}].[{M}].[{M}H]	34.8603	83.9919
					C(C(O[{M}])CO_[{M}])(O[{M}])[{M}]>>C(=O)(C(O[{M}])[{M}])CO_[{M}].[{M}H]	-47.4437	53.8445
					C(=O)(C(O[{M}])[{M}])CO_[{M}].[{M}].[{M}]>>C(=O)(C(=O)CO_[{M}])[{M}].[{M}].[{M}].[{M}H]	-81.0637	19.5521
					C(=O)(C(=O)CO_[{M}])[{M}].[{M}].[{M}]>>C(=O)([{M}])[{M}].C(=O)(CO_[{M}])[{M}]	-101.938	86.0761
					C(=O)([{M}])[{M}]>>O=[C:].[{M}].[{M}]	84.3706	0
					the above pathway is of length 8 and contains
					rule OHadsorption2 occurs 1 times
					rule CHscission occurs 1 times
					rule CHscission4 occurs 1 times
					rule CCscission occurs 1 times
					rule OHscission occurs 1 times
					rule OHscission2 occurs 1 times
					rule CdoubleOFormation occurs 1 times
					rule CarbonMonoxideFormation occurs 1 times
					Max Ea is			86.0761
					C(CO)(CO)O.[{M}].[{M}]>>C(O_[{M}])(CO)CO_[{M}]	-34.9437	0
					C(O_[{M}])(CO)CO_[{M}].[{M}].[{M}]>>C(O_[{M}])(CO[{M}])CO_[{M}].[{M}H]	6.84912	59.9022
					C(O_[{M}])(CO[{M}])CO_[{M}].[{M}].[{M}]>>C(C(O_[{M}])CO_[{M}])(O[{M}])[{M}].[{M}H]	-64.8105	36.1303
					C(C(O_[{M}])CO_[{M}])(O[{M}])[{M}].[{M}].[{M}]>>C(C(O[{M}])CO_[{M}])(O[{M}])[{M}].[{M}].[{M}H]	34.8603	83.9919
					C(C(O[{M}])CO_[{M}])(O[{M}])[{M}]>>C(=O)(C(O[{M}])[{M}])CO_[{M}].[{M}H]	-47.4437	53.8445
					C(=O)(C(O[{M}])[{M}])CO_[{M}].[{M}].[{M}]>>C(=O)(C(=O)CO_[{M}])[{M}].[{M}].[{M}].[{M}H]	-81.0637	19.5521
					C(=O)(C(=O)CO_[{M}])[{M}].[{M}].[{M}]>>C(=O)([{M}])[{M}].C(=O)(CO_[{M}])[{M}]	-101.938	86.0761
					C(=O)([{M}])[{M}]>>O=[C:].[{M}].[{M}]	84.3706	0
					the above pathway is of length 8 and contains
					rule OHadsorption2 occurs 1 times
					rule CHscission occurs 1 times
					rule CHscission4 occurs 1 times
					rule CCscission occurs 1 times
					rule OHscission occurs 1 times
					rule OHscission2 occurs 1 times
					rule CdoubleOFormation occurs 1 times
					rule CarbonMonoxideFormation occurs 1 times
					Max Ea is			86.0761
					C(CO)(CO)O.[{M}].[{M}]>>C(O_[{M}])(CO)CO_[{M}]	-34.9437	0
					C(O_[{M}])(CO)CO_[{M}].[{M}].[{M}]>>C(C(O_[{M}])CO_[{M}])([{M}])O.[{M}H]	-86.2239	14.2886
					C(C(O_[{M}])CO_[{M}])([{M}])O.[{M}].[{M}]>>C(C([{M}])O)(CO_[{M}])O[{M}].[{M}].[{M}H]	34.8603	83.9919
					C(C([{M}])O)(CO_[{M}])O[{M}].[{M}].[{M}]>>C(C(O[{M}])CO_[{M}])(O[{M}])[{M}].[{M}H]	28.2626	78.3178
					C(C(O[{M}])CO_[{M}])(O[{M}])[{M}]>>C(=O)(C(O[{M}])[{M}])CO_[{M}].[{M}H]	-47.4437	53.8445
					C(=O)(C(O[{M}])[{M}])CO_[{M}].[{M}].[{M}]>>C(=O)(C(=O)CO_[{M}])[{M}].[{M}].[{M}].[{M}H]	-81.0637	19.5521
					C(=O)(C(=O)CO_[{M}])[{M}].[{M}].[{M}]>>C(=O)([{M}])[{M}].C(=O)(CO_[{M}])[{M}]	-101.938	86.0761
					C(=O)([{M}])[{M}]>>O=[C:].[{M}].[{M}]	84.3706	0
					the above pathway is of length 8 and contains
					rule OHadsorption2 occurs 1 times
					rule CHscission occurs 1 times
					rule CHscission4 occurs 1 times
					rule CCscission occurs 1 times
					rule OHscission occurs 1 times
					rule OHscission2 occurs 1 times
					rule CdoubleOFormation occurs 1 times
					rule CarbonMonoxideFormation occurs 1 times
					Max Ea is			86.0761
					C(CO)(CO)O.[{M}].[{M}]>>C(O_[{M}])(CO)CO_[{M}]	-34.9437	0
					C(O_[{M}])(CO)CO_[{M}].[{M}].[{M}]>>C(O[{M}])(CO_[{M}])CO_[{M}].[{M}H]	12.7358	64.9648
					C(O[{M}])(CO_[{M}])CO_[{M}].[{M}].[{M}]>>C(C([{M}])O)(CO_[{M}])O[{M}].[{M}].[{M}H]	-64.0994	36.8556
					C(C([{M}])O)(CO_[{M}])O[{M}].[{M}].[{M}]>>C(C(O[{M}])CO_[{M}])(O[{M}])[{M}].[{M}H]	28.2626	78.3178
					C(C(O[{M}])CO_[{M}])(O[{M}])[{M}]>>C(=O)(C(O[{M}])[{M}])CO_[{M}].[{M}H]	-47.4437	53.8445
					C(=O)(C(O[{M}])[{M}])CO_[{M}].[{M}].[{M}]>>C(=O)(C(=O)CO_[{M}])[{M}].[{M}].[{M}].[{M}H]	-81.0637	19.5521
					C(=O)(C(=O)CO_[{M}])[{M}].[{M}].[{M}]>>C(=O)([{M}])[{M}].C(=O)(CO_[{M}])[{M}]	-101.938	86.0761
					C(=O)([{M}])[{M}]>>O=[C:].[{M}].[{M}]	84.3706	0
					the above pathway is of length 8 and contains
					rule OHadsorption2 occurs 1 times
					rule CHscission2 occurs 1 times
					rule CHscission4 occurs 1 times
					rule CCscission occurs 1 times
					rule OHscission occurs 1 times
					rule OHscission4 occurs 1 times
					rule CdoubleOFormation occurs 1 times
					rule CarbonMonoxideFormation occurs 1 times
					Max Ea is			86.0761
					C(CO)(CO)O.[{M}].[{M}]>>C(O_[{M}])(CO)CO_[{M}]	-34.9437	0
					C(O_[{M}])(CO)CO_[{M}].[{M}].[{M}]>>C(O_[{M}])(CO[{M}])CO_[{M}].[{M}H]	6.84912	59.9022
					C(O_[{M}])(CO[{M}])CO_[{M}].[{M}].[{M}]>>C(O[{M}])(CO[{M}])CO_[{M}].[{M}].[{M}H]	34.8603	83.9919
					C(O[{M}])(CO[{M}])CO_[{M}].[{M}].[{M}]>>C(C(O[{M}])CO_[{M}])(O[{M}])[{M}].[{M}H]	-64.8105	36.1303
					C(C(O[{M}])CO_[{M}])(O[{M}])[{M}]>>C(=O)(C(O[{M}])[{M}])CO_[{M}].[{M}H]	-47.4437	53.8445
					C(=O)(C(O[{M}])[{M}])CO_[{M}].[{M}].[{M}]>>C(=O)(C(=O)CO_[{M}])[{M}].[{M}].[{M}].[{M}H]	-81.0637	19.5521
					C(=O)(C(=O)CO_[{M}])[{M}].[{M}].[{M}]>>C(=O)([{M}])[{M}].C(=O)(CO_[{M}])[{M}]	-101.938	86.0761
					C(=O)([{M}])[{M}]>>O=[C:].[{M}].[{M}]	84.3706	0
					the above pathway is of length 8 and contains
					rule OHadsorption2 occurs 1 times
					rule CHscission occurs 1 times
					rule CHscission4 occurs 1 times
					rule CCscission occurs 1 times
					rule OHscission occurs 1 times
					rule OHscission2 occurs 1 times
					rule CdoubleOFormation occurs 1 times
					rule CarbonMonoxideFormation occurs 1 times
					Max Ea is			86.0761
					C(CO)(CO)O.[{M}].[{M}]>>C(O_[{M}])(CO)CO_[{M}]	-34.9437	0
					C(O_[{M}])(CO)CO_[{M}].[{M}].[{M}]>>C(O[{M}])(CO_[{M}])CO_[{M}].[{M}H]	12.7358	64.9648
					C(O[{M}])(CO_[{M}])CO_[{M}].[{M}].[{M}]>>C(O[{M}])(CO[{M}])CO_[{M}].[{M}].[{M}H]	28.9736	78.9293
					C(O[{M}])(CO[{M}])CO_[{M}].[{M}].[{M}]>>C(C(O[{M}])CO_[{M}])(O[{M}])[{M}].[{M}H]	-64.8105	36.1303
					C(C(O[{M}])CO_[{M}])(O[{M}])[{M}]>>C(=O)(C(O[{M}])[{M}])CO_[{M}].[{M}H]	-47.4437	53.8445
					C(=O)(C(O[{M}])[{M}])CO_[{M}].[{M}].[{M}]>>C(=O)(C(=O)CO_[{M}])[{M}].[{M}].[{M}].[{M}H]	-81.0637	19.5521
					C(=O)(C(=O)CO_[{M}])[{M}].[{M}].[{M}]>>C(=O)([{M}])[{M}].C(=O)(CO_[{M}])[{M}]	-101.938	86.0761
					C(=O)([{M}])[{M}]>>O=[C:].[{M}].[{M}]	84.3706	0
					the above pathway is of length 8 and contains
					rule OHadsorption2 occurs 1 times
					rule CHscission occurs 1 times
					rule CHscission4 occurs 1 times
					rule CCscission occurs 1 times
					rule OHscission2 occurs 1 times
					rule OHscission4 occurs 1 times
					rule CdoubleOFormation occurs 1 times
					rule CarbonMonoxideFormation occurs 1 times
					Max Ea is			86.0761
					C(CO)(CO)O.[{M}].[{M}]>>C(O_[{M}])(CO)CO_[{M}]	-34.9437	0
					C(O_[{M}])(CO)CO_[{M}].[{M}].[{M}]>>C(CO_[{M}])(CO_[{M}])([{M}])O.[{M}H]	-58.1863	42.887
					C(CO_[{M}])(CO_[{M}])([{M}])O.[{M}].[{M}]>>C(O[{M}])(CO_[{M}])(CO_[{M}])[{M}].[{M}H]	28.2626	78.3178
					C(O[{M}])(CO_[{M}])(CO_[{M}])[{M}].[{M}].[{M}]>>C(O[{M}])(CO[{M}])(CO_[{M}])[{M}].[{M}].[{M}H]	28.9736	78.9293
					C(O[{M}])(CO[{M}])(CO_[{M}])[{M}].[{M}].[{M}]>>C(=O)(C(O[{M}])[{M}])CO_[{M}].[{M}].[{M}].[{M}H]	-69.5946	31.2505
					C(=O)(C(O[{M}])[{M}])CO_[{M}].[{M}].[{M}]>>C(=O)(C(=O)CO_[{M}])[{M}].[{M}].[{M}].[{M}H]	-81.0637	19.5521
					C(=O)(C(=O)CO_[{M}])[{M}].[{M}].[{M}]>>C(=O)([{M}])[{M}].C(=O)(CO_[{M}])[{M}]	-101.938	86.0761
					C(=O)([{M}])[{M}]>>O=[C:].[{M}].[{M}]	84.3706	0
					the above pathway is of length 8 and contains
					rule OHadsorption2 occurs 1 times
					rule CHscission3 occurs 1 times
					rule CHscission4 occurs 1 times
					rule CHscission7 occurs 1 times
					rule CCscission occurs 1 times
					rule OHscission occurs 1 times
					rule OHscission2 occurs 1 times
					rule CarbonMonoxideFormation occurs 1 times
					Max Ea is			86.0761
					C(CO)(CO)O.[{M}].[{M}]>>C(O_[{M}])(CO)CO_[{M}]	-34.9437	0
					C(O_[{M}])(CO)CO_[{M}].[{M}].[{M}]>>C(O[{M}])(CO_[{M}])CO_[{M}].[{M}H]	12.7358	64.9648
					C(O[{M}])(CO_[{M}])CO_[{M}].[{M}].[{M}]>>C(O[{M}])(CO_[{M}])(CO_[{M}])[{M}].[{M}H]	-42.6595	58.7243
					C(O[{M}])(CO_[{M}])(CO_[{M}])[{M}].[{M}].[{M}]>>C(O[{M}])(CO[{M}])(CO_[{M}])[{M}].[{M}].[{M}H]	28.9736	78.9293
					C(O[{M}])(CO[{M}])(CO_[{M}])[{M}].[{M}].[{M}]>>C(=O)(C(O[{M}])[{M}])CO_[{M}].[{M}].[{M}].[{M}H]	-69.5946	31.2505
					C(=O)(C(O[{M}])[{M}])CO_[{M}].[{M}].[{M}]>>C(=O)(C(=O)CO_[{M}])[{M}].[{M}].[{M}].[{M}H]	-81.0637	19.5521
					C(=O)(C(=O)CO_[{M}])[{M}].[{M}].[{M}]>>C(=O)([{M}])[{M}].C(=O)(CO_[{M}])[{M}]	-101.938	86.0761
					C(=O)([{M}])[{M}]>>O=[C:].[{M}].[{M}]	84.3706	0
					the above pathway is of length 8 and contains
					rule OHadsorption2 occurs 1 times
					rule CHscission occurs 1 times
					rule CHscission3 occurs 1 times
					rule CHscission4 occurs 1 times
					rule CCscission occurs 1 times
					rule OHscission2 occurs 1 times
					rule OHscission4 occurs 1 times
					rule CarbonMonoxideFormation occurs 1 times
					Max Ea is			86.0761
					C(CO)(CO)O.[{M}].[{M}]>>C(O_[{M}])(CO)CO_[{M}]	-34.9437	0
					C(O_[{M}])(CO)CO_[{M}].[{M}].[{M}]>>C(CO_[{M}])(CO_[{M}])([{M}])O.[{M}H]	-58.1863	42.887
					C(CO_[{M}])(CO_[{M}])([{M}])O.[{M}].[{M}]>>C(CO[{M}])(CO_[{M}])([{M}])O.[{M}].[{M}H]	28.9736	78.9293
					C(CO[{M}])(CO_[{M}])([{M}])O.[{M}].[{M}]>>C(O[{M}])(CO[{M}])(CO_[{M}])[{M}].[{M}H]	28.2626	78.3178
					C(O[{M}])(CO[{M}])(CO_[{M}])[{M}].[{M}].[{M}]>>C(=O)(C(O[{M}])[{M}])CO_[{M}].[{M}].[{M}].[{M}H]	-69.5946	31.2505
					C(=O)(C(O[{M}])[{M}])CO_[{M}].[{M}].[{M}]>>C(=O)(C(=O)CO_[{M}])[{M}].[{M}].[{M}].[{M}H]	-81.0637	19.5521
					C(=O)(C(=O)CO_[{M}])[{M}].[{M}].[{M}]>>C(=O)([{M}])[{M}].C(=O)(CO_[{M}])[{M}]	-101.938	86.0761
					C(=O)([{M}])[{M}]>>O=[C:].[{M}].[{M}]	84.3706	0
					the above pathway is of length 8 and contains
					rule OHadsorption2 occurs 1 times
					rule CHscission3 occurs 1 times
					rule CHscission4 occurs 1 times
					rule CHscission7 occurs 1 times
					rule CCscission occurs 1 times
					rule OHscission occurs 1 times
					rule OHscission2 occurs 1 times
					rule CarbonMonoxideFormation occurs 1 times
					Max Ea is			86.0761
					C(CO)(CO)O.[{M}].[{M}]>>C(O_[{M}])(CO)CO_[{M}]	-34.9437	0
					C(O_[{M}])(CO)CO_[{M}].[{M}].[{M}]>>C(O_[{M}])(CO[{M}])CO_[{M}].[{M}H]	6.84912	59.9022
					C(O_[{M}])(CO[{M}])CO_[{M}].[{M}].[{M}]>>C(CO[{M}])(CO_[{M}])([{M}])O.[{M}].[{M}H]	-36.0618	65.454
					C(CO[{M}])(CO_[{M}])([{M}])O.[{M}].[{M}]>>C(O[{M}])(CO[{M}])(CO_[{M}])[{M}].[{M}H]	28.2626	78.3178
					C(O[{M}])(CO[{M}])(CO_[{M}])[{M}].[{M}].[{M}]>>C(=O)(C(O[{M}])[{M}])CO_[{M}].[{M}].[{M}].[{M}H]	-69.5946	31.2505
					C(=O)(C(O[{M}])[{M}])CO_[{M}].[{M}].[{M}]>>C(=O)(C(=O)CO_[{M}])[{M}].[{M}].[{M}].[{M}H]	-81.0637	19.5521
					C(=O)(C(=O)CO_[{M}])[{M}].[{M}].[{M}]>>C(=O)([{M}])[{M}].C(=O)(CO_[{M}])[{M}]	-101.938	86.0761
					C(=O)([{M}])[{M}]>>O=[C:].[{M}].[{M}]	84.3706	0
					the above pathway is of length 8 and contains
					rule OHadsorption2 occurs 1 times
					rule CHscission2 occurs 1 times
					rule CHscission3 occurs 1 times
					rule CHscission4 occurs 1 times
					rule CCscission occurs 1 times
					rule OHscission occurs 2 times
					rule CarbonMonoxideFormation occurs 1 times
					Max Ea is			86.0761
					C(CO)(CO)O.[{M}].[{M}]>>C(O_[{M}])(CO)CO_[{M}]	-34.9437	0
					C(O_[{M}])(CO)CO_[{M}].[{M}].[{M}]>>C(O_[{M}])(CO[{M}])CO_[{M}].[{M}H]	6.84912	59.9022
					C(O_[{M}])(CO[{M}])CO_[{M}].[{M}].[{M}]>>C(O[{M}])(CO[{M}])CO_[{M}].[{M}].[{M}H]	34.8603	83.9919
					C(O[{M}])(CO[{M}])CO_[{M}].[{M}].[{M}]>>C(O[{M}])(CO[{M}])(CO_[{M}])[{M}].[{M}H]	-42.6595	58.7243
					C(O[{M}])(CO[{M}])(CO_[{M}])[{M}].[{M}].[{M}]>>C(=O)(C(O[{M}])[{M}])CO_[{M}].[{M}].[{M}].[{M}H]	-69.5946	31.2505
					C(=O)(C(O[{M}])[{M}])CO_[{M}].[{M}].[{M}]>>C(=O)(C(=O)CO_[{M}])[{M}].[{M}].[{M}].[{M}H]	-81.0637	19.5521
					C(=O)(C(=O)CO_[{M}])[{M}].[{M}].[{M}]>>C(=O)([{M}])[{M}].C(=O)(CO_[{M}])[{M}]	-101.938	86.0761
					C(=O)([{M}])[{M}]>>O=[C:].[{M}].[{M}]	84.3706	0
					the above pathway is of length 8 and contains
					rule OHadsorption2 occurs 1 times
					rule CHscission occurs 1 times
					rule CHscission3 occurs 1 times
					rule CHscission4 occurs 1 times
					rule CCscission occurs 1 times
					rule OHscission occurs 1 times
					rule OHscission2 occurs 1 times
					rule CarbonMonoxideFormation occurs 1 times
					Max Ea is			86.0761
					C(CO)(CO)O.[{M}].[{M}]>>C(O_[{M}])(CO)CO_[{M}]	-34.9437	0
					C(O_[{M}])(CO)CO_[{M}].[{M}].[{M}]>>C(O[{M}])(CO_[{M}])CO_[{M}].[{M}H]	12.7358	64.9648
					C(O[{M}])(CO_[{M}])CO_[{M}].[{M}].[{M}]>>C(O[{M}])(CO[{M}])CO_[{M}].[{M}].[{M}H]	28.9736	78.9293
					C(O[{M}])(CO[{M}])CO_[{M}].[{M}].[{M}]>>C(O[{M}])(CO[{M}])(CO_[{M}])[{M}].[{M}H]	-42.6595	58.7243
					C(O[{M}])(CO[{M}])(CO_[{M}])[{M}].[{M}].[{M}]>>C(=O)(C(O[{M}])[{M}])CO_[{M}].[{M}].[{M}].[{M}H]	-69.5946	31.2505
					C(=O)(C(O[{M}])[{M}])CO_[{M}].[{M}].[{M}]>>C(=O)(C(=O)CO_[{M}])[{M}].[{M}].[{M}].[{M}H]	-81.0637	19.5521
					C(=O)(C(=O)CO_[{M}])[{M}].[{M}].[{M}]>>C(=O)([{M}])[{M}].C(=O)(CO_[{M}])[{M}]	-101.938	86.0761
					C(=O)([{M}])[{M}]>>O=[C:].[{M}].[{M}]	84.3706	0
					the above pathway is of length 8 and contains
					rule OHadsorption2 occurs 1 times
					rule CHscission occurs 1 times
					rule CHscission3 occurs 1 times
					rule CHscission4 occurs 1 times
					rule CCscission occurs 1 times
					rule OHscission2 occurs 1 times
					rule OHscission4 occurs 1 times
					rule CarbonMonoxideFormation occurs 1 times
					Max Ea is			86.0761
					C(CO)(CO)O.[{M}].[{M}]>>C(O_[{M}])(CO)CO_[{M}]	-34.9437	0
					C(O_[{M}])(CO)CO_[{M}].[{M}].[{M}]>>C(C(O_[{M}])CO_[{M}])([{M}])O.[{M}H]	-86.2239	14.2886
					C(C(O_[{M}])CO_[{M}])([{M}])O.[{M}].[{M}]>>C(C([{M}])O)(CO_[{M}])([{M}])O.[{M}].[{M}H]	-14.6484	87.2957
					C(C([{M}])O)(CO_[{M}])([{M}])O>>C(=O)(C([{M}])O)CO_[{M}].[{M}H]	2.06501	55.7879
					C(=O)(C([{M}])O)CO_[{M}].[{M}].[{M}]>>C(=O)(C(O[{M}])[{M}])CO_[{M}].[{M}H]	28.2626	78.3178
					C(=O)(C(O[{M}])[{M}])CO_[{M}]>>C(=O)(C(=O)CO_[{M}])[{M}].[{M}H]	-81.0637	19.5521
					C(=O)(C(=O)CO_[{M}])[{M}].[{M}].[{M}]>>C(=O)([{M}])[{M}].C(=O)(CO_[{M}])[{M}]	-101.938	86.0761
					C(=O)([{M}])[{M}]>>O=[C:].[{M}].[{M}]	84.3706	0
					the above pathway is of length 8 and contains
					rule OHadsorption2 occurs 1 times
					rule CHscission occurs 1 times
					rule CHscission2 occurs 1 times
					rule CCscission occurs 1 times
					rule OHscission occurs 1 times
					rule CdoubleOFormation occurs 1 times
					rule CdoubleOFromCOH occurs 1 times
					rule CarbonMonoxideFormation occurs 1 times
					Max Ea is			87.2957
					C(CO)(CO)O.[{M}].[{M}]>>C(O_[{M}])(CO)CO_[{M}]	-34.9437	0
					C(O_[{M}])(CO)CO_[{M}].[{M}].[{M}]>>C(CO_[{M}])(CO_[{M}])([{M}])O.[{M}H]	-58.1863	42.887
					C(CO_[{M}])(CO_[{M}])([{M}])O.[{M}].[{M}]>>C(C([{M}])O)(CO_[{M}])([{M}])O.[{M}].[{M}H]	-42.686	58.6973
					C(C([{M}])O)(CO_[{M}])([{M}])O>>C(=O)(C([{M}])O)CO_[{M}].[{M}H]	2.06501	55.7879
					C(=O)(C([{M}])O)CO_[{M}].[{M}].[{M}]>>C(=O)(C(O[{M}])[{M}])CO_[{M}].[{M}H]	28.2626	78.3178
					C(=O)(C(O[{M}])[{M}])CO_[{M}]>>C(=O)(C(=O)CO_[{M}])[{M}].[{M}H]	-81.0637	19.5521
					C(=O)(C(=O)CO_[{M}])[{M}].[{M}].[{M}]>>C(=O)([{M}])[{M}].C(=O)(CO_[{M}])[{M}]	-101.938	86.0761
					C(=O)([{M}])[{M}]>>O=[C:].[{M}].[{M}]	84.3706	0
					the above pathway is of length 8 and contains
					rule OHadsorption2 occurs 1 times
					rule CHscission2 occurs 1 times
					rule CHscission7 occurs 1 times
					rule CCscission occurs 1 times
					rule OHscission occurs 1 times
					rule CdoubleOFormation occurs 1 times
					rule CdoubleOFromCOH occurs 1 times
					rule CarbonMonoxideFormation occurs 1 times
					Max Ea is			86.0761
					C(CO)(CO)O.[{M}].[{M}]>>C(O_[{M}])(CO)CO_[{M}]	-34.9437	0
					C(O_[{M}])(CO)CO_[{M}].[{M}].[{M}]>>C(C(O_[{M}])CO_[{M}])([{M}])O.[{M}H]	-86.2239	14.2886
					C(C(O_[{M}])CO_[{M}])([{M}])O.[{M}].[{M}]>>C(C([{M}])O)(CO_[{M}])O[{M}].[{M}].[{M}H]	34.8603	83.9919
					C(C([{M}])O)(CO_[{M}])O[{M}]>>C(=O)(C([{M}])O)CO_[{M}].[{M}H]	-47.4437	53.8445
					C(=O)(C([{M}])O)CO_[{M}].[{M}].[{M}]>>C(=O)(C(O[{M}])[{M}])CO_[{M}].[{M}H]	28.2626	78.3178
					C(=O)(C(O[{M}])[{M}])CO_[{M}]>>C(=O)(C(=O)CO_[{M}])[{M}].[{M}H]	-81.0637	19.5521
					C(=O)(C(=O)CO_[{M}])[{M}].[{M}].[{M}]>>C(=O)([{M}])[{M}].C(=O)(CO_[{M}])[{M}]	-101.938	86.0761
					C(=O)([{M}])[{M}]>>O=[C:].[{M}].[{M}]	84.3706	0
					the above pathway is of length 8 and contains
					rule OHadsorption2 occurs 1 times
					rule CHscission occurs 1 times
					rule CCscission occurs 1 times
					rule OHscission occurs 1 times
					rule OHscission2 occurs 1 times
					rule CdoubleOFormation occurs 2 times
					rule CarbonMonoxideFormation occurs 1 times
					Max Ea is			86.0761
					C(CO)(CO)O.[{M}].[{M}]>>C(O_[{M}])(CO)CO_[{M}]	-34.9437	0
					C(O_[{M}])(CO)CO_[{M}].[{M}].[{M}]>>C(O[{M}])(CO_[{M}])CO_[{M}].[{M}H]	12.7358	64.9648
					C(O[{M}])(CO_[{M}])CO_[{M}].[{M}].[{M}]>>C(C([{M}])O)(CO_[{M}])O[{M}].[{M}].[{M}H]	-64.0994	36.8556
					C(C([{M}])O)(CO_[{M}])O[{M}]>>C(=O)(C([{M}])O)CO_[{M}].[{M}H]	-47.4437	53.8445
					C(=O)(C([{M}])O)CO_[{M}].[{M}].[{M}]>>C(=O)(C(O[{M}])[{M}])CO_[{M}].[{M}H]	28.2626	78.3178
					C(=O)(C(O[{M}])[{M}])CO_[{M}]>>C(=O)(C(=O)CO_[{M}])[{M}].[{M}H]	-81.0637	19.5521
					C(=O)(C(=O)CO_[{M}])[{M}].[{M}].[{M}]>>C(=O)([{M}])[{M}].C(=O)(CO_[{M}])[{M}]	-101.938	86.0761
					C(=O)([{M}])[{M}]>>O=[C:].[{M}].[{M}]	84.3706	0
					the above pathway is of length 8 and contains
					rule OHadsorption2 occurs 1 times
					rule CHscission2 occurs 1 times
					rule CCscission occurs 1 times
					rule OHscission occurs 1 times
					rule OHscission4 occurs 1 times
					rule CdoubleOFormation occurs 2 times
					rule CarbonMonoxideFormation occurs 1 times
					Max Ea is			86.0761
					C(CO)(CO)O.[{M}].[{M}]>>C(O_[{M}])(CO)CO_[{M}]	-34.9437	0
					C(O_[{M}])(CO)CO_[{M}].[{M}].[{M}]>>C(CO_[{M}])(CO_[{M}])([{M}])O.[{M}H]	-58.1863	42.887
					C(CO_[{M}])(CO_[{M}])([{M}])O.[{M}].[{M}]>>C(O[{M}])(CO_[{M}])(CO_[{M}])[{M}].[{M}H]	28.2626	78.3178
					C(O[{M}])(CO_[{M}])(CO_[{M}])[{M}].[{M}].[{M}]>>C(=O)(C([{M}])O)CO_[{M}].[{M}].[{M}].[{M}].[{M}H]	-68.8835	31.9758
					C(=O)(C([{M}])O)CO_[{M}].[{M}].[{M}]>>C(=O)(C(O[{M}])[{M}])CO_[{M}].[{M}H]	28.2626	78.3178
					C(=O)(C(O[{M}])[{M}])CO_[{M}]>>C(=O)(C(=O)CO_[{M}])[{M}].[{M}H]	-81.0637	19.5521
					C(=O)(C(=O)CO_[{M}])[{M}].[{M}].[{M}]>>C(=O)([{M}])[{M}].C(=O)(CO_[{M}])[{M}]	-101.938	86.0761
					C(=O)([{M}])[{M}]>>O=[C:].[{M}].[{M}]	84.3706	0
					the above pathway is of length 8 and contains
					rule OHadsorption2 occurs 1 times
					rule CHscission5 occurs 1 times
					rule CHscission7 occurs 1 times
					rule CCscission occurs 1 times
					rule OHscission occurs 2 times
					rule CdoubleOFormation occurs 1 times
					rule CarbonMonoxideFormation occurs 1 times
					Max Ea is			86.0761
					C(CO)(CO)O.[{M}].[{M}]>>C(O_[{M}])(CO)CO_[{M}]	-34.9437	0
					C(O_[{M}])(CO)CO_[{M}].[{M}].[{M}]>>C(O[{M}])(CO_[{M}])CO_[{M}].[{M}H]	12.7358	64.9648
					C(O[{M}])(CO_[{M}])CO_[{M}].[{M}].[{M}]>>C(O[{M}])(CO_[{M}])(CO_[{M}])[{M}].[{M}H]	-42.6595	58.7243
					C(O[{M}])(CO_[{M}])(CO_[{M}])[{M}].[{M}].[{M}]>>C(=O)(C([{M}])O)CO_[{M}].[{M}].[{M}].[{M}].[{M}H]	-68.8835	31.9758
					C(=O)(C([{M}])O)CO_[{M}].[{M}].[{M}]>>C(=O)(C(O[{M}])[{M}])CO_[{M}].[{M}H]	28.2626	78.3178
					C(=O)(C(O[{M}])[{M}])CO_[{M}]>>C(=O)(C(=O)CO_[{M}])[{M}].[{M}H]	-81.0637	19.5521
					C(=O)(C(=O)CO_[{M}])[{M}].[{M}].[{M}]>>C(=O)([{M}])[{M}].C(=O)(CO_[{M}])[{M}]	-101.938	86.0761
					C(=O)([{M}])[{M}]>>O=[C:].[{M}].[{M}]	84.3706	0
					the above pathway is of length 8 and contains
					rule OHadsorption2 occurs 1 times
					rule CHscission occurs 1 times
					rule CHscission5 occurs 1 times
					rule CCscission occurs 1 times
					rule OHscission occurs 1 times
					rule OHscission4 occurs 1 times
					rule CdoubleOFormation occurs 1 times
					rule CarbonMonoxideFormation occurs 1 times
					Max Ea is			86.0761
					C(CO)(CO)O.[{M}].[{M}]>>C(O_[{M}])(CO)CO_[{M}]	-34.9437	0
					C(O_[{M}])(CO)CO_[{M}].[{M}].[{M}]>>C(C(O_[{M}])CO_[{M}])([{M}])O.[{M}H]	-86.2239	14.2886
					C(C(O_[{M}])CO_[{M}])([{M}])O.[{M}].[{M}]>>C(C(O_[{M}])CO_[{M}])(O[{M}])[{M}].[{M}H]	28.2626	78.3178
					C(C(O_[{M}])CO_[{M}])(O[{M}])[{M}].[{M}].[{M}]>>C(C(O[{M}])CO_[{M}])(O[{M}])[{M}].[{M}].[{M}H]	34.8603	83.9919
					C(C(O[{M}])CO_[{M}])(O[{M}])[{M}]>>C(=O)(C(O[{M}])[{M}])CO_[{M}].[{M}H]	-47.4437	53.8445
					C(=O)(C(O[{M}])[{M}])CO_[{M}]>>C(=O)(C(=O)CO_[{M}])[{M}].[{M}H]	-81.0637	19.5521
					C(=O)(C(=O)CO_[{M}])[{M}].[{M}].[{M}]>>C(=O)([{M}])[{M}].C(=O)(CO_[{M}])[{M}]	-101.938	86.0761
					C(=O)([{M}])[{M}]>>O=[C:].[{M}].[{M}]	84.3706	0
					the above pathway is of length 8 and contains
					rule OHadsorption2 occurs 1 times
					rule CHscission occurs 1 times
					rule CCscission occurs 1 times
					rule OHscission occurs 1 times
					rule OHscission2 occurs 1 times
					rule CdoubleOFormation occurs 2 times
					rule CarbonMonoxideFormation occurs 1 times
					Max Ea is			86.0761
					C(CO)(CO)O.[{M}].[{M}]>>C(O_[{M}])(CO)CO_[{M}]	-34.9437	0
					C(O_[{M}])(CO)CO_[{M}].[{M}].[{M}]>>C(O_[{M}])(CO[{M}])CO_[{M}].[{M}H]	6.84912	59.9022
					C(O_[{M}])(CO[{M}])CO_[{M}].[{M}].[{M}]>>C(C(O_[{M}])CO_[{M}])(O[{M}])[{M}].[{M}H]	-64.8105	36.1303
					C(C(O_[{M}])CO_[{M}])(O[{M}])[{M}].[{M}].[{M}]>>C(C(O[{M}])CO_[{M}])(O[{M}])[{M}].[{M}].[{M}H]	34.8603	83.9919
					C(C(O[{M}])CO_[{M}])(O[{M}])[{M}]>>C(=O)(C(O[{M}])[{M}])CO_[{M}].[{M}H]	-47.4437	53.8445
					C(=O)(C(O[{M}])[{M}])CO_[{M}]>>C(=O)(C(=O)CO_[{M}])[{M}].[{M}H]	-81.0637	19.5521
					C(=O)(C(=O)CO_[{M}])[{M}].[{M}].[{M}]>>C(=O)([{M}])[{M}].C(=O)(CO_[{M}])[{M}]	-101.938	86.0761
					C(=O)([{M}])[{M}]>>O=[C:].[{M}].[{M}]	84.3706	0
					the above pathway is of length 8 and contains
					rule OHadsorption2 occurs 1 times
					rule CHscission occurs 1 times
					rule CCscission occurs 1 times
					rule OHscission occurs 1 times
					rule OHscission2 occurs 1 times
					rule CdoubleOFormation occurs 2 times
					rule CarbonMonoxideFormation occurs 1 times
					Max Ea is			86.0761
					C(CO)(CO)O.[{M}].[{M}]>>C(O_[{M}])(CO)CO_[{M}]	-34.9437	0
					C(O_[{M}])(CO)CO_[{M}].[{M}].[{M}]>>C(C(O_[{M}])CO_[{M}])([{M}])O.[{M}H]	-86.2239	14.2886
					C(C(O_[{M}])CO_[{M}])([{M}])O.[{M}].[{M}]>>C(C([{M}])O)(CO_[{M}])O[{M}].[{M}].[{M}H]	34.8603	83.9919
					C(C([{M}])O)(CO_[{M}])O[{M}].[{M}].[{M}]>>C(C(O[{M}])CO_[{M}])(O[{M}])[{M}].[{M}H]	28.2626	78.3178
					C(C(O[{M}])CO_[{M}])(O[{M}])[{M}]>>C(=O)(C(O[{M}])[{M}])CO_[{M}].[{M}H]	-47.4437	53.8445
					C(=O)(C(O[{M}])[{M}])CO_[{M}]>>C(=O)(C(=O)CO_[{M}])[{M}].[{M}H]	-81.0637	19.5521
					C(=O)(C(=O)CO_[{M}])[{M}].[{M}].[{M}]>>C(=O)([{M}])[{M}].C(=O)(CO_[{M}])[{M}]	-101.938	86.0761
					C(=O)([{M}])[{M}]>>O=[C:].[{M}].[{M}]	84.3706	0
					the above pathway is of length 8 and contains
					rule OHadsorption2 occurs 1 times
					rule CHscission occurs 1 times
					rule CCscission occurs 1 times
					rule OHscission occurs 1 times
					rule OHscission2 occurs 1 times
					rule CdoubleOFormation occurs 2 times
					rule CarbonMonoxideFormation occurs 1 times
					Max Ea is			86.0761
					C(CO)(CO)O.[{M}].[{M}]>>C(O_[{M}])(CO)CO_[{M}]	-34.9437	0
					C(O_[{M}])(CO)CO_[{M}].[{M}].[{M}]>>C(O[{M}])(CO_[{M}])CO_[{M}].[{M}H]	12.7358	64.9648
					C(O[{M}])(CO_[{M}])CO_[{M}].[{M}].[{M}]>>C(C([{M}])O)(CO_[{M}])O[{M}].[{M}].[{M}H]	-64.0994	36.8556
					C(C([{M}])O)(CO_[{M}])O[{M}].[{M}].[{M}]>>C(C(O[{M}])CO_[{M}])(O[{M}])[{M}].[{M}H]	28.2626	78.3178
					C(C(O[{M}])CO_[{M}])(O[{M}])[{M}]>>C(=O)(C(O[{M}])[{M}])CO_[{M}].[{M}H]	-47.4437	53.8445
					C(=O)(C(O[{M}])[{M}])CO_[{M}]>>C(=O)(C(=O)CO_[{M}])[{M}].[{M}H]	-81.0637	19.5521
					C(=O)(C(=O)CO_[{M}])[{M}].[{M}].[{M}]>>C(=O)([{M}])[{M}].C(=O)(CO_[{M}])[{M}]	-101.938	86.0761
					C(=O)([{M}])[{M}]>>O=[C:].[{M}].[{M}]	84.3706	0
					the above pathway is of length 8 and contains
					rule OHadsorption2 occurs 1 times
					rule CHscission2 occurs 1 times
					rule CCscission occurs 1 times
					rule OHscission occurs 1 times
					rule OHscission4 occurs 1 times
					rule CdoubleOFormation occurs 2 times
					rule CarbonMonoxideFormation occurs 1 times
					Max Ea is			86.0761
					C(CO)(CO)O.[{M}].[{M}]>>C(O_[{M}])(CO)CO_[{M}]	-34.9437	0
					C(O_[{M}])(CO)CO_[{M}].[{M}].[{M}]>>C(O_[{M}])(CO[{M}])CO_[{M}].[{M}H]	6.84912	59.9022
					C(O_[{M}])(CO[{M}])CO_[{M}].[{M}].[{M}]>>C(O[{M}])(CO[{M}])CO_[{M}].[{M}].[{M}H]	34.8603	83.9919
					C(O[{M}])(CO[{M}])CO_[{M}].[{M}].[{M}]>>C(C(O[{M}])CO_[{M}])(O[{M}])[{M}].[{M}H]	-64.8105	36.1303
					C(C(O[{M}])CO_[{M}])(O[{M}])[{M}]>>C(=O)(C(O[{M}])[{M}])CO_[{M}].[{M}H]	-47.4437	53.8445
					C(=O)(C(O[{M}])[{M}])CO_[{M}]>>C(=O)(C(=O)CO_[{M}])[{M}].[{M}H]	-81.0637	19.5521
					C(=O)(C(=O)CO_[{M}])[{M}].[{M}].[{M}]>>C(=O)([{M}])[{M}].C(=O)(CO_[{M}])[{M}]	-101.938	86.0761
					C(=O)([{M}])[{M}]>>O=[C:].[{M}].[{M}]	84.3706	0
					the above pathway is of length 8 and contains
					rule OHadsorption2 occurs 1 times
					rule CHscission occurs 1 times
					rule CCscission occurs 1 times
					rule OHscission occurs 1 times
					rule OHscission2 occurs 1 times
					rule CdoubleOFormation occurs 2 times
					rule CarbonMonoxideFormation occurs 1 times
					Max Ea is			86.0761
					C(CO)(CO)O.[{M}].[{M}]>>C(O_[{M}])(CO)CO_[{M}]	-34.9437	0
					C(O_[{M}])(CO)CO_[{M}].[{M}].[{M}]>>C(O[{M}])(CO_[{M}])CO_[{M}].[{M}H]	12.7358	64.9648
					C(O[{M}])(CO_[{M}])CO_[{M}].[{M}].[{M}]>>C(O[{M}])(CO[{M}])CO_[{M}].[{M}].[{M}H]	28.9736	78.9293
					C(O[{M}])(CO[{M}])CO_[{M}].[{M}].[{M}]>>C(C(O[{M}])CO_[{M}])(O[{M}])[{M}].[{M}H]	-64.8105	36.1303
					C(C(O[{M}])CO_[{M}])(O[{M}])[{M}]>>C(=O)(C(O[{M}])[{M}])CO_[{M}].[{M}H]	-47.4437	53.8445
					C(=O)(C(O[{M}])[{M}])CO_[{M}]>>C(=O)(C(=O)CO_[{M}])[{M}].[{M}H]	-81.0637	19.5521
					C(=O)(C(=O)CO_[{M}])[{M}].[{M}].[{M}]>>C(=O)([{M}])[{M}].C(=O)(CO_[{M}])[{M}]	-101.938	86.0761
					C(=O)([{M}])[{M}]>>O=[C:].[{M}].[{M}]	84.3706	0
					the above pathway is of length 8 and contains
					rule OHadsorption2 occurs 1 times
					rule CHscission occurs 1 times
					rule CCscission occurs 1 times
					rule OHscission2 occurs 1 times
					rule OHscission4 occurs 1 times
					rule CdoubleOFormation occurs 2 times
					rule CarbonMonoxideFormation occurs 1 times
					Max Ea is			86.0761
					C(CO)(CO)O.[{M}].[{M}]>>C(O_[{M}])(CO)CO_[{M}]	-34.9437	0
					C(O_[{M}])(CO)CO_[{M}].[{M}].[{M}]>>C(CO_[{M}])(CO_[{M}])([{M}])O.[{M}H]	-58.1863	42.887
					C(CO_[{M}])(CO_[{M}])([{M}])O.[{M}].[{M}]>>C(O[{M}])(CO_[{M}])(CO_[{M}])[{M}].[{M}H]	28.2626	78.3178
					C(O[{M}])(CO_[{M}])(CO_[{M}])[{M}].[{M}].[{M}]>>C(O[{M}])(CO[{M}])(CO_[{M}])[{M}].[{M}].[{M}H]	28.9736	78.9293
					C(O[{M}])(CO[{M}])(CO_[{M}])[{M}].[{M}].[{M}]>>C(=O)(C(O[{M}])[{M}])CO_[{M}].[{M}].[{M}].[{M}H]	-69.5946	31.2505
					C(=O)(C(O[{M}])[{M}])CO_[{M}]>>C(=O)(C(=O)CO_[{M}])[{M}].[{M}H]	-81.0637	19.5521
					C(=O)(C(=O)CO_[{M}])[{M}].[{M}].[{M}]>>C(=O)([{M}])[{M}].C(=O)(CO_[{M}])[{M}]	-101.938	86.0761
					C(=O)([{M}])[{M}]>>O=[C:].[{M}].[{M}]	84.3706	0
					the above pathway is of length 8 and contains
					rule OHadsorption2 occurs 1 times
					rule CHscission3 occurs 1 times
					rule CHscission7 occurs 1 times
					rule CCscission occurs 1 times
					rule OHscission occurs 1 times
					rule OHscission2 occurs 1 times
					rule CdoubleOFormation occurs 1 times
					rule CarbonMonoxideFormation occurs 1 times
					Max Ea is			86.0761
					C(CO)(CO)O.[{M}].[{M}]>>C(O_[{M}])(CO)CO_[{M}]	-34.9437	0
					C(O_[{M}])(CO)CO_[{M}].[{M}].[{M}]>>C(O[{M}])(CO_[{M}])CO_[{M}].[{M}H]	12.7358	64.9648
					C(O[{M}])(CO_[{M}])CO_[{M}].[{M}].[{M}]>>C(O[{M}])(CO_[{M}])(CO_[{M}])[{M}].[{M}H]	-42.6595	58.7243
					C(O[{M}])(CO_[{M}])(CO_[{M}])[{M}].[{M}].[{M}]>>C(O[{M}])(CO[{M}])(CO_[{M}])[{M}].[{M}].[{M}H]	28.9736	78.9293
					C(O[{M}])(CO[{M}])(CO_[{M}])[{M}].[{M}].[{M}]>>C(=O)(C(O[{M}])[{M}])CO_[{M}].[{M}].[{M}].[{M}H]	-69.5946	31.2505
					C(=O)(C(O[{M}])[{M}])CO_[{M}]>>C(=O)(C(=O)CO_[{M}])[{M}].[{M}H]	-81.0637	19.5521
					C(=O)(C(=O)CO_[{M}])[{M}].[{M}].[{M}]>>C(=O)([{M}])[{M}].C(=O)(CO_[{M}])[{M}]	-101.938	86.0761
					C(=O)([{M}])[{M}]>>O=[C:].[{M}].[{M}]	84.3706	0
					the above pathway is of length 8 and contains
					rule OHadsorption2 occurs 1 times
					rule CHscission occurs 1 times
					rule CHscission3 occurs 1 times
					rule CCscission occurs 1 times
					rule OHscission2 occurs 1 times
					rule OHscission4 occurs 1 times
					rule CdoubleOFormation occurs 1 times
					rule CarbonMonoxideFormation occurs 1 times
					Max Ea is			86.0761
					C(CO)(CO)O.[{M}].[{M}]>>C(O_[{M}])(CO)CO_[{M}]	-34.9437	0
					C(O_[{M}])(CO)CO_[{M}].[{M}].[{M}]>>C(CO_[{M}])(CO_[{M}])([{M}])O.[{M}H]	-58.1863	42.887
					C(CO_[{M}])(CO_[{M}])([{M}])O.[{M}].[{M}]>>C(CO[{M}])(CO_[{M}])([{M}])O.[{M}].[{M}H]	28.9736	78.9293
					C(CO[{M}])(CO_[{M}])([{M}])O.[{M}].[{M}]>>C(O[{M}])(CO[{M}])(CO_[{M}])[{M}].[{M}H]	28.2626	78.3178
					C(O[{M}])(CO[{M}])(CO_[{M}])[{M}].[{M}].[{M}]>>C(=O)(C(O[{M}])[{M}])CO_[{M}].[{M}].[{M}].[{M}H]	-69.5946	31.2505
					C(=O)(C(O[{M}])[{M}])CO_[{M}]>>C(=O)(C(=O)CO_[{M}])[{M}].[{M}H]	-81.0637	19.5521
					C(=O)(C(=O)CO_[{M}])[{M}].[{M}].[{M}]>>C(=O)([{M}])[{M}].C(=O)(CO_[{M}])[{M}]	-101.938	86.0761
					C(=O)([{M}])[{M}]>>O=[C:].[{M}].[{M}]	84.3706	0
					the above pathway is of length 8 and contains
					rule OHadsorption2 occurs 1 times
					rule CHscission3 occurs 1 times
					rule CHscission7 occurs 1 times
					rule CCscission occurs 1 times
					rule OHscission occurs 1 times
					rule OHscission2 occurs 1 times
					rule CdoubleOFormation occurs 1 times
					rule CarbonMonoxideFormation occurs 1 times
					Max Ea is			86.0761
					C(CO)(CO)O.[{M}].[{M}]>>C(O_[{M}])(CO)CO_[{M}]	-34.9437	0
					C(O_[{M}])(CO)CO_[{M}].[{M}].[{M}]>>C(O_[{M}])(CO[{M}])CO_[{M}].[{M}H]	6.84912	59.9022
					C(O_[{M}])(CO[{M}])CO_[{M}].[{M}].[{M}]>>C(CO[{M}])(CO_[{M}])([{M}])O.[{M}].[{M}H]	-36.0618	65.454
					C(CO[{M}])(CO_[{M}])([{M}])O.[{M}].[{M}]>>C(O[{M}])(CO[{M}])(CO_[{M}])[{M}].[{M}H]	28.2626	78.3178
					C(O[{M}])(CO[{M}])(CO_[{M}])[{M}].[{M}].[{M}]>>C(=O)(C(O[{M}])[{M}])CO_[{M}].[{M}].[{M}].[{M}H]	-69.5946	31.2505
					C(=O)(C(O[{M}])[{M}])CO_[{M}]>>C(=O)(C(=O)CO_[{M}])[{M}].[{M}H]	-81.0637	19.5521
					C(=O)(C(=O)CO_[{M}])[{M}].[{M}].[{M}]>>C(=O)([{M}])[{M}].C(=O)(CO_[{M}])[{M}]	-101.938	86.0761
					C(=O)([{M}])[{M}]>>O=[C:].[{M}].[{M}]	84.3706	0
					the above pathway is of length 8 and contains
					rule OHadsorption2 occurs 1 times
					rule CHscission2 occurs 1 times
					rule CHscission3 occurs 1 times
					rule CCscission occurs 1 times
					rule OHscission occurs 2 times
					rule CdoubleOFormation occurs 1 times
					rule CarbonMonoxideFormation occurs 1 times
					Max Ea is			86.0761
					C(CO)(CO)O.[{M}].[{M}]>>C(O_[{M}])(CO)CO_[{M}]	-34.9437	0
					C(O_[{M}])(CO)CO_[{M}].[{M}].[{M}]>>C(O_[{M}])(CO[{M}])CO_[{M}].[{M}H]	6.84912	59.9022
					C(O_[{M}])(CO[{M}])CO_[{M}].[{M}].[{M}]>>C(O[{M}])(CO[{M}])CO_[{M}].[{M}].[{M}H]	34.8603	83.9919
					C(O[{M}])(CO[{M}])CO_[{M}].[{M}].[{M}]>>C(O[{M}])(CO[{M}])(CO_[{M}])[{M}].[{M}H]	-42.6595	58.7243
					C(O[{M}])(CO[{M}])(CO_[{M}])[{M}].[{M}].[{M}]>>C(=O)(C(O[{M}])[{M}])CO_[{M}].[{M}].[{M}].[{M}H]	-69.5946	31.2505
					C(=O)(C(O[{M}])[{M}])CO_[{M}]>>C(=O)(C(=O)CO_[{M}])[{M}].[{M}H]	-81.0637	19.5521
					C(=O)(C(=O)CO_[{M}])[{M}].[{M}].[{M}]>>C(=O)([{M}])[{M}].C(=O)(CO_[{M}])[{M}]	-101.938	86.0761
					C(=O)([{M}])[{M}]>>O=[C:].[{M}].[{M}]	84.3706	0
					the above pathway is of length 8 and contains
					rule OHadsorption2 occurs 1 times
					rule CHscission occurs 1 times
					rule CHscission3 occurs 1 times
					rule CCscission occurs 1 times
					rule OHscission occurs 1 times
					rule OHscission2 occurs 1 times
					rule CdoubleOFormation occurs 1 times
					rule CarbonMonoxideFormation occurs 1 times
					Max Ea is			86.0761
					C(CO)(CO)O.[{M}].[{M}]>>C(O_[{M}])(CO)CO_[{M}]	-34.9437	0
					C(O_[{M}])(CO)CO_[{M}].[{M}].[{M}]>>C(O[{M}])(CO_[{M}])CO_[{M}].[{M}H]	12.7358	64.9648
					C(O[{M}])(CO_[{M}])CO_[{M}].[{M}].[{M}]>>C(O[{M}])(CO[{M}])CO_[{M}].[{M}].[{M}H]	28.9736	78.9293
					C(O[{M}])(CO[{M}])CO_[{M}].[{M}].[{M}]>>C(O[{M}])(CO[{M}])(CO_[{M}])[{M}].[{M}H]	-42.6595	58.7243
					C(O[{M}])(CO[{M}])(CO_[{M}])[{M}].[{M}].[{M}]>>C(=O)(C(O[{M}])[{M}])CO_[{M}].[{M}].[{M}].[{M}H]	-69.5946	31.2505
					C(=O)(C(O[{M}])[{M}])CO_[{M}]>>C(=O)(C(=O)CO_[{M}])[{M}].[{M}H]	-81.0637	19.5521
					C(=O)(C(=O)CO_[{M}])[{M}].[{M}].[{M}]>>C(=O)([{M}])[{M}].C(=O)(CO_[{M}])[{M}]	-101.938	86.0761
					C(=O)([{M}])[{M}]>>O=[C:].[{M}].[{M}]	84.3706	0
					the above pathway is of length 8 and contains
					rule OHadsorption2 occurs 1 times
					rule CHscission occurs 1 times
					rule CHscission3 occurs 1 times
					rule CCscission occurs 1 times
					rule OHscission2 occurs 1 times
					rule OHscission4 occurs 1 times
					rule CdoubleOFormation occurs 1 times
					rule CarbonMonoxideFormation occurs 1 times
					Max Ea is			86.0761
					total valid pathways is 100
					total distinct pathways is 100
					2 pathways from C(CO)(CO)O containing
					1of rule OHadsorption2
					1of rule CHscission
					1of rule CHscission3
					1of rule CCscission
					1of rule OHscission
					1of rule OHscission2
					1of rule CdoubleOFormation
					1of rule CarbonMonoxideFormation
					1 pathways from C(CO)(CO)O containing
					1of rule OHadsorption2
					1of rule CHscission2
					1of rule CHscission7
					1of rule CCscission
					1of rule OHscission
					1of rule CdoubleOFormation
					1of rule CdoubleOFromCOH
					1of rule CarbonMonoxideFormation
					1 pathways from C(CO)(CO)O containing
					1of rule OHadsorption2
					1of rule CHscission4
					1of rule CHscission5
					1of rule CHscission7
					1of rule CCscission
					2of rule OHscission
					1of rule CarbonMonoxideFormation
					1 pathways from C(CO)(CO)O containing
					1of rule OHadsorption2
					1of rule CHscission5
					1of rule CHscission7
					1of rule CCscission
					2of rule OHscission
					1of rule CdoubleOFormation
					1of rule CarbonMonoxideFormation
					1 pathways from C(CO)(CO)O containing
					1of rule OHadsorption2
					1of rule CHscission2
					1of rule CHscission4
					1of rule CHscission7
					1of rule CCscission
					1of rule OHscission
					1of rule CdoubleOFromCOH
					1of rule CarbonMonoxideFormation
					1 pathways from C(CO)(CO)O containing
					1of rule OHadsorption2
					1of rule CHscission
					1of rule CHscission3
					1of rule CHscission4
					1of rule CCscission
					1of rule OHscission
					1of rule OHscission2
					1of rule CarbonMonoxideFormation
					1 pathways from C(CO)(CO)O containing
					1of rule OHadsorption2
					1of rule CHscission
					1of rule CHscission7
					1of rule CCscission
					1of rule OHscission2
					1of rule CdoubleOFormation
					1of rule CdoubleOFromCOH
					1of rule CarbonMonoxideFormation
					2 pathways from C(CO)(CO)O containing
					1of rule OHadsorption2
					1of rule CHscission3
					1of rule CHscission4
					1of rule CHscission7
					1of rule CCscission
					1of rule OHscission
					1of rule OHscission2
					1of rule CarbonMonoxideFormation
					4 pathways from C(CO)(CO)O containing
					1of rule OHadsorption2
					1of rule CHscission
					1of rule CHscission2
					1of rule CHscission7
					1of rule CCscission
					2of rule CdoubleOFromCOH
					1of rule CarbonMonoxideFormation
					1 pathways from C(CO)(CO)O containing
					1of rule OHadsorption2
					2of rule CHscission
					1of rule CHscission5
					1of rule CCscission
					1of rule OHscission4
					1of rule CdoubleOFromCOH
					1of rule CarbonMonoxideFormation
					3 pathways from C(CO)(CO)O containing
					1of rule OHadsorption2
					1of rule CHscission2
					1of rule CCscission
					1of rule OHscission
					1of rule OHscission4
					2of rule CdoubleOFormation
					1of rule CarbonMonoxideFormation
					2 pathways from C(CO)(CO)O containing
					1of rule OHadsorption2
					1of rule CHscission
					1of rule CHscission3
					1of rule CHscission4
					1of rule CCscission
					1of rule OHscission2
					1of rule OHscission4
					1of rule CarbonMonoxideFormation
					1 pathways from C(CO)(CO)O containing
					1of rule OHadsorption2
					1of rule CHscission2
					1of rule CHscission3
					1of rule CHscission4
					1of rule CCscission
					2of rule OHscission
					1of rule CarbonMonoxideFormation
					4 pathways from C(CO)(CO)O containing
					1of rule OHadsorption2
					1of rule CHscission
					1of rule CHscission3
					1of rule CCscission
					1of rule OHscission2
					1of rule OHscission4
					1of rule CdoubleOFormation
					1of rule CarbonMonoxideFormation
					3 pathways from C(CO)(CO)O containing
					1of rule OHadsorption2
					1of rule CHscission
					1of rule CHscission2
					1of rule CHscission4
					1of rule CCscission
					1of rule OHscission
					1of rule CdoubleOFromCOH
					1of rule CarbonMonoxideFormation
					4 pathways from C(CO)(CO)O containing
					1of rule OHadsorption2
					1of rule CHscission
					1of rule CHscission2
					1of rule CCscission
					1of rule OHscission
					1of rule CdoubleOFormation
					1of rule CdoubleOFromCOH
					1of rule CarbonMonoxideFormation
					2 pathways from C(CO)(CO)O containing
					1of rule OHadsorption2
					1of rule CHscission
					1of rule CHscission4
					1of rule CCscission
					1of rule OHscission2
					1of rule OHscission4
					1of rule CdoubleOFormation
					1of rule CarbonMonoxideFormation
					3 pathways from C(CO)(CO)O containing
					1of rule OHadsorption2
					1of rule CHscission
					1of rule CHscission2
					1of rule CCscission
					1of rule OHscission4
					1of rule CdoubleOFormation
					1of rule CdoubleOFromCOH
					1of rule CarbonMonoxideFormation
					2 pathways from C(CO)(CO)O containing
					1of rule OHadsorption2
					2of rule CHscission
					1of rule CHscission5
					1of rule CCscission
					1of rule OHscission
					1of rule CdoubleOFromCOH
					1of rule CarbonMonoxideFormation
					1 pathways from C(CO)(CO)O containing
					1of rule OHadsorption2
					1of rule CHscission
					2of rule CHscission3
					1of rule CCscission
					1of rule OHscission2
					1of rule OHscission4
					1of rule CarbonMonoxideFormation
					2 pathways from C(CO)(CO)O containing
					1of rule OHadsorption2
					1of rule CHscission
					1of rule CCscission
					1of rule OHscission2
					1of rule OHscission4
					2of rule CdoubleOFormation
					1of rule CarbonMonoxideFormation
					11 pathways from C(CO)(CO)O containing
					1of rule OHadsorption2
					1of rule CHscission
					1of rule CCscission
					1of rule OHscission
					1of rule OHscission2
					2of rule CdoubleOFormation
					1of rule CarbonMonoxideFormation
					6 pathways from C(CO)(CO)O containing
[truncated: 120 more rows]

## Sheet: Rh
This is the output from RING for pathways query. All reactions in a pathway are given together and all pathways are given one below the other. The second column is the enthalpy of reaction, and the third column is the activation barriers. The Max Ea in the pathway is given in the fourth
Results on Rh at 550K
Propane diol					Carbon Monoxide
molecule C(CO)(O)C satisfies constraints					molecule O=[C:] satisfies constraints
shortest path to the molecule is 4					shortest path to the molecule is 5
Pathways for C(CO)(O)C					Pathways for O=[C:]
C(CO)(CO)O.[{M}].[{M}]>>C(O_[{M}])(CO)CO_[{M}]	-52.1177	0			C(CO)(CO)O.[{M}].[{M}]>>C(O_[{M}])(CO)CO_[{M}]	-52.1177	0
C(O_[{M}])(CO)CO_[{M}].[{M}].[{M}]>>C(O_[{M}])(C[{M}])CO_[{M}].[{M}]O	-47.8407	104.913			C(O_[{M}])(CO)CO_[{M}].[{M}].[{M}]>>C(C(O_[{M}])CO_[{M}])([{M}])O.[{M}H]	-98.5564	1.70947
C(O_[{M}])(C[{M}])CO_[{M}].[{M}H]>>C(O_[{M}])(CO_[{M}])C.[{M}].[{M}]	48.0304	95.3181			C(C(O_[{M}])CO_[{M}])([{M}])O.[{M}].[{M}]>>C(C(O_[{M}])CO_[{M}])([{M}])([{M}])O.[{M}H]	-39.2155	62.2372
C(O_[{M}])(CO_[{M}])C>>C(CO)(O)C.[{M}].[{M}]	53.3726	0			C(C(O_[{M}])CO_[{M}])([{M}])([{M}])O.[{M}].[{M}]>>C(C(CO_[{M}])([{M}])O)([{M}])([{M}])O.[{M}].[{M}H]	-9.7464	92.2957
					C(C(CO_[{M}])([{M}])O)([{M}])([{M}])O>>C(C(=O)CO_[{M}])([{M}])([{M}])O.[{M}H]	-3.9501	50.6149
the above pathway is of length 4 and contains					C(C(=O)CO_[{M}])([{M}])([{M}])O>>C(=O)(C(=O)CO_[{M}])[{M}].[{M}H]	3.71454	57.2065
rule OHadsorption2 occurs 1 times					C(=O)(C(=O)CO_[{M}])[{M}].[{M}].[{M}]>>C(=O)([{M}])[{M}].C(=O)(CO_[{M}])[{M}]	-130.403	67.2892
rule OHdesorption2 occurs 1 times					C(=O)([{M}])[{M}]>>O=[C:].[{M}].[{M}]	112.836	0
rule CHformation occurs 1 times
rule COScission occurs 1 times					the above pathway is of length 8 and contains
Max Ea is			104.913		rule OHadsorption2 occurs 1 times
					rule CHscission occurs 2 times
C(CO)(CO)O.[{M}].[{M}]>>C(O_[{M}])(CO)CO_[{M}]	-52.1177	0			rule CHscission2 occurs 1 times
C(O_[{M}])(CO)CO_[{M}].[{M}].[{M}]>>C(O_[{M}])(CO[{M}])CO_[{M}].[{M}H]	-34.1859	24.6121			rule CCscission occurs 1 times
C(O_[{M}])(CO[{M}])CO_[{M}].[{M}].[{M}]>>C(O_[{M}])(C[{M}])CO_[{M}].O([{M}])[{M}]	-72.8089	119.202			rule CdoubleOFromCOH occurs 2 times
C(O_[{M}])(C[{M}])CO_[{M}].[{M}H]>>C(O_[{M}])(CO_[{M}])C.[{M}].[{M}]	48.0304	95.3181			rule CarbonMonoxideFormation occurs 1 times
C(O_[{M}])(CO_[{M}])C>>C(CO)(O)C.[{M}].[{M}]	53.3726	0			Max Ea is			92.2957
the above pathway is of length 5 and contains					C(CO)(CO)O.[{M}].[{M}]>>C(O_[{M}])(CO)CO_[{M}]	-52.1177	0
rule OHadsorption2 occurs 1 times					C(O_[{M}])(CO)CO_[{M}].[{M}].[{M}]>>C(C(O_[{M}])CO_[{M}])([{M}])O.[{M}H]	-98.5564	1.70947
rule OHdesorption2 occurs 1 times					C(C(O_[{M}])CO_[{M}])([{M}])O.[{M}].[{M}]>>C(C([{M}])O)(CO_[{M}])([{M}])O.[{M}].[{M}H]	-18.3939	83.4753
rule OHscission occurs 1 times					C(C([{M}])O)(CO_[{M}])([{M}])O.[{M}].[{M}]>>C(C(CO_[{M}])([{M}])O)([{M}])([{M}])O.[{M}H]	-30.568	71.0576
rule CHformation occurs 1 times					C(C(CO_[{M}])([{M}])O)([{M}])([{M}])O>>C(C(=O)CO_[{M}])([{M}])([{M}])O.[{M}H]	-3.9501	50.6149
rule COScission occurs 1 times					C(C(=O)CO_[{M}])([{M}])([{M}])O>>C(=O)(C(=O)CO_[{M}])[{M}].[{M}H]	3.71454	57.2065
Max Ea is			119.202		C(=O)(C(=O)CO_[{M}])[{M}].[{M}].[{M}]>>C(=O)([{M}])[{M}].C(=O)(CO_[{M}])[{M}]	-130.403	67.2892
					C(=O)([{M}])[{M}]>>O=[C:].[{M}].[{M}]	112.836	0
C(CO)(CO)O.[{M}].[{M}]>>C(O_[{M}])(CO)CO_[{M}]	-52.1177	0
C(O_[{M}])(CO)CO_[{M}].[{M}].[{M}]>>C(C(O_[{M}])CO_[{M}])([{M}])O.[{M}H]	-98.5564	1.70947			the above pathway is of length 8 and contains
C(C(O_[{M}])CO_[{M}])([{M}])O.[{M}].[{M}]>>C(C(O_[{M}])CO_[{M}])(O[{M}])[{M}].[{M}H]	-12.7724	43.0277			rule OHadsorption2 occurs 1 times
C(C(O_[{M}])CO_[{M}])(O[{M}])[{M}].[{M}H]>>C(O_[{M}])(CO[{M}])CO_[{M}].[{M}].[{M}]	77.143	120.355			rule CHscission occurs 2 times
C(O_[{M}])(CO[{M}])CO_[{M}].[{M}].[{M}]>>C(O_[{M}])(C[{M}])CO_[{M}].O([{M}])[{M}]	-72.8089	119.202			rule CHscission2 occurs 1 times
C(O_[{M}])(C[{M}])CO_[{M}].[{M}H]>>C(O_[{M}])(CO_[{M}])C.[{M}].[{M}]	48.0304	95.3181			rule CCscission occurs 1 times
C(O_[{M}])(CO_[{M}])C>>C(CO)(O)C.[{M}].[{M}]	53.3726	0			rule CdoubleOFromCOH occurs 2 times
					rule CarbonMonoxideFormation occurs 1 times
the above pathway is of length 7 and contains					Max Ea is			83.4753
rule OHadsorption2 occurs 1 times
rule OHdesorption2 occurs 1 times					C(CO)(CO)O.[{M}].[{M}]>>C(O_[{M}])(CO)CO_[{M}]	-52.1177	0
rule CHscission occurs 1 times					C(O_[{M}])(CO)CO_[{M}].[{M}].[{M}]>>C(CO_[{M}])(CO_[{M}])([{M}])O.[{M}H]	-70.5188	30.3078
rule OHscission occurs 1 times					C(CO_[{M}])(CO_[{M}])([{M}])O.[{M}].[{M}]>>C(C([{M}])O)(CO_[{M}])([{M}])O.[{M}].[{M}H]	-46.4315	54.8769
rule CHformation occurs 2 times					C(C([{M}])O)(CO_[{M}])([{M}])O.[{M}].[{M}]>>C(C(CO_[{M}])([{M}])O)([{M}])([{M}])O.[{M}H]	-30.568	71.0576
rule COScission occurs 1 times					C(C(CO_[{M}])([{M}])O)([{M}])([{M}])O>>C(C(=O)CO_[{M}])([{M}])([{M}])O.[{M}H]	-3.9501	50.6149
Max Ea is			120.355		C(C(=O)CO_[{M}])([{M}])([{M}])O>>C(=O)(C(=O)CO_[{M}])[{M}].[{M}H]	3.71454	57.2065
					C(=O)(C(=O)CO_[{M}])[{M}].[{M}].[{M}]>>C(=O)([{M}])[{M}].C(=O)(CO_[{M}])[{M}]	-130.403	67.2892
C(CO)(CO)O.[{M}].[{M}]>>C(O_[{M}])(CO)CO_[{M}]	-52.1177	0			C(=O)([{M}])[{M}]>>O=[C:].[{M}].[{M}]	112.836	0
C(O_[{M}])(CO)CO_[{M}].[{M}].[{M}]>>C(C(O_[{M}])CO_[{M}])([{M}])O.[{M}H]	-98.5564	1.70947
C(C(O_[{M}])CO_[{M}])([{M}])O.[{M}].[{M}]>>C(C([{M}])O)(CO[{M}])O_[{M}].[{M}].[{M}H]	-3.47436	51.0241			the above pathway is of length 8 and contains
C(C([{M}])O)(CO[{M}])O_[{M}].[{M}H]>>C(O_[{M}])(CO[{M}])CO_[{M}].[{M}]	67.8449	103.594			rule OHadsorption2 occurs 1 times
C(O_[{M}])(CO[{M}])CO_[{M}].[{M}].[{M}]>>C(O_[{M}])(C[{M}])CO_[{M}].O([{M}])[{M}]	-72.8089	119.202			rule CHscission occurs 1 times
C(O_[{M}])(C[{M}])CO_[{M}].[{M}H]>>C(O_[{M}])(CO_[{M}])C.[{M}].[{M}]	48.0304	95.3181			rule CHscission2 occurs 1 times
C(O_[{M}])(CO_[{M}])C>>C(CO)(O)C.[{M}].[{M}]	53.3726	0			rule CHscission7 occurs 1 times
					rule CCscission occurs 1 times
the above pathway is of length 7 and contains					rule CdoubleOFromCOH occurs 2 times
rule OHadsorption2 occurs 1 times					rule CarbonMonoxideFormation occurs 1 times
rule OHdesorption2 occurs 1 times					Max Ea is			71.0576
rule CHscission occurs 1 times
rule OHscission2 occurs 1 times					C(CO)(CO)O.[{M}].[{M}]>>C(O_[{M}])(CO)CO_[{M}]	-52.1177	0
rule CHformation occurs 1 times					C(O_[{M}])(CO)CO_[{M}].[{M}].[{M}]>>C(C(O_[{M}])CO_[{M}])([{M}])O.[{M}H]	-98.5564	1.70947
rule CHformation2 occurs 1 times					C(C(O_[{M}])CO_[{M}])([{M}])O.[{M}].[{M}]>>C(C(O_[{M}])CO_[{M}])([{M}])([{M}])O.[{M}H]	-39.2155	62.2372
rule COScission occurs 1 times					C(C(O_[{M}])CO_[{M}])([{M}])([{M}])O.[{M}].[{M}]>>C(C(O[{M}])CO_[{M}])([{M}])([{M}])O.[{M}].[{M}H]	2.4123	56.0866
Max Ea is			119.202		C(C(O[{M}])CO_[{M}])([{M}])([{M}])O>>C(C(=O)CO_[{M}])([{M}])([{M}])O.[{M}H]	-16.1088	85.806
					C(C(=O)CO_[{M}])([{M}])([{M}])O>>C(=O)(C(=O)CO_[{M}])[{M}].[{M}H]	3.71454	57.2065
C(CO)(CO)O.[{M}].[{M}]>>C(O_[{M}])(CO)CO_[{M}]	-52.1177	0			C(=O)(C(=O)CO_[{M}])[{M}].[{M}].[{M}]>>C(=O)([{M}])[{M}].C(=O)(CO_[{M}])[{M}]	-130.403	67.2892
C(O_[{M}])(CO)CO_[{M}].[{M}].[{M}]>>C(CO_[{M}])(CO_[{M}])([{M}])O.[{M}H]	-70.5188	30.3078			C(=O)([{M}])[{M}]>>O=[C:].[{M}].[{M}]	112.836	0
C(CO_[{M}])(CO_[{M}])([{M}])O.[{M}].[{M}]>>C(CO[{M}])(CO_[{M}])([{M}])O.[{M}].[{M}H]	-3.47436	51.0241
C(CO[{M}])(CO_[{M}])([{M}])O.[{M}H]>>C(O_[{M}])(CO[{M}])CO_[{M}].[{M}]	39.8073	103.033			the above pathway is of length 8 and contains
C(O_[{M}])(CO[{M}])CO_[{M}].[{M}].[{M}]>>C(O_[{M}])(C[{M}])CO_[{M}].O([{M}])[{M}]	-72.8089	119.202			rule OHadsorption2 occurs 1 times
C(O_[{M}])(C[{M}])CO_[{M}].[{M}H]>>C(O_[{M}])(CO_[{M}])C.[{M}].[{M}]	48.0304	95.3181			rule CHscission occurs 2 times
C(O_[{M}])(CO_[{M}])C>>C(CO)(O)C.[{M}].[{M}]	53.3726	0			rule CCscission occurs 1 times
					rule OHscission2 occurs 1 times
the above pathway is of length 7 and contains					rule CdoubleOFormation occurs 1 times
rule OHadsorption2 occurs 1 times					rule CdoubleOFromCOH occurs 1 times
rule OHdesorption2 occurs 1 times					rule CarbonMonoxideFormation occurs 1 times
rule CHscission7 occurs 1 times					Max Ea is			85.806
rule OHscission2 occurs 1 times
rule CHformation occurs 1 times					C(CO)(CO)O.[{M}].[{M}]>>C(O_[{M}])(CO)CO_[{M}]	-52.1177	0
rule CHformation2 occurs 1 times					C(O_[{M}])(CO)CO_[{M}].[{M}].[{M}]>>C(C(O_[{M}])CO_[{M}])([{M}])O.[{M}H]	-98.5564	1.70947
rule COScission occurs 1 times					C(C(O_[{M}])CO_[{M}])([{M}])O.[{M}].[{M}]>>C(C([{M}])O)(CO_[{M}])O[{M}].[{M}].[{M}H]	2.4123	56.0866
Max Ea is			119.202		C(C([{M}])O)(CO_[{M}])O[{M}].[{M}].[{M}]>>C(C(O[{M}])CO_[{M}])([{M}])([{M}])O.[{M}H]	-39.2155	62.2372
					C(C(O[{M}])CO_[{M}])([{M}])([{M}])O>>C(C(=O)CO_[{M}])([{M}])([{M}])O.[{M}H]	-16.1088	85.806
C(CO)(CO)O.[{M}].[{M}]>>C(O_[{M}])(CO)CO_[{M}]	-52.1177	0			C(C(=O)CO_[{M}])([{M}])([{M}])O>>C(=O)(C(=O)CO_[{M}])[{M}].[{M}H]	3.71454	57.2065
C(O_[{M}])(CO)CO_[{M}].[{M}].[{M}]>>C(O[{M}])(CO_[{M}])CO_[{M}].[{M}H]	-28.2992	29.6747			C(=O)(C(=O)CO_[{M}])[{M}].[{M}].[{M}]>>C(=O)([{M}])[{M}].C(=O)(CO_[{M}])[{M}]	-130.403	67.2892
C(O[{M}])(CO_[{M}])CO_[{M}].[{M}].[{M}]>>C(O[{M}])(CO[{M}])CO_[{M}].[{M}].[{M}H]	-3.47436	51.0241			C(=O)([{M}])[{M}]>>O=[C:].[{M}].[{M}]	112.836	0
C(O[{M}])(CO[{M}])CO_[{M}].[{M}H]>>C(O_[{M}])(CO[{M}])CO_[{M}].[{M}]	-2.4123	54.3497
C(O_[{M}])(CO[{M}])CO_[{M}].[{M}].[{M}]>>C(O_[{M}])(C[{M}])CO_[{M}].O([{M}])[{M}]	-72.8089	119.202			the above pathway is of length 8 and contains
C(O_[{M}])(C[{M}])CO_[{M}].[{M}H]>>C(O_[{M}])(CO_[{M}])C.[{M}].[{M}]	48.0304	95.3181			rule OHadsorption2 occurs 1 times
C(O_[{M}])(CO_[{M}])C>>C(CO)(O)C.[{M}].[{M}]	53.3726	0			rule CHscission occurs 2 times
					rule CCscission occurs 1 times
the above pathway is of length 7 and contains					rule OHscission2 occurs 1 times
rule OHadsorption2 occurs 1 times					rule CdoubleOFormation occurs 1 times
rule OHdesorption2 occurs 1 times					rule CdoubleOFromCOH occurs 1 times
rule OHscission2 occurs 1 times					rule CarbonMonoxideFormation occurs 1 times
rule OHscission4 occurs 1 times					Max Ea is			85.806
rule CHformation occurs 1 times
rule OHformation2 occurs 1 times					C(CO)(CO)O.[{M}].[{M}]>>C(O_[{M}])(CO)CO_[{M}]	-52.1177	0
rule COScission occurs 1 times					C(O_[{M}])(CO)CO_[{M}].[{M}].[{M}]>>C(O[{M}])(CO_[{M}])CO_[{M}].[{M}H]	-28.2992	29.6747
Max Ea is			119.202		C(O[{M}])(CO_[{M}])CO_[{M}].[{M}].[{M}]>>C(C([{M}])O)(CO_[{M}])O[{M}].[{M}].[{M}H]	-67.8449	33.0352
					C(C([{M}])O)(CO_[{M}])O[{M}].[{M}].[{M}]>>C(C(O[{M}])CO_[{M}])([{M}])([{M}])O.[{M}H]	-39.2155	62.2372
C(CO)(CO)O.[{M}].[{M}]>>C(O_[{M}])(CO)CO_[{M}]	-52.1177	0			C(C(O[{M}])CO_[{M}])([{M}])([{M}])O>>C(C(=O)CO_[{M}])([{M}])([{M}])O.[{M}H]	-16.1088	85.806
C(O_[{M}])(CO)CO_[{M}].[{M}].[{M}]>>C(C(O_[{M}])CO_[{M}])([{M}])O.[{M}H]	-98.5564	1.70947			C(C(=O)CO_[{M}])([{M}])([{M}])O>>C(=O)(C(=O)CO_[{M}])[{M}].[{M}H]	3.71454	57.2065
C(C(O_[{M}])CO_[{M}])([{M}])O.[{M}].[{M}]>>C(C(O_[{M}])CO_[{M}])([{M}])[{M}].[{M}]O	42.1916	167.036			C(=O)(C(=O)CO_[{M}])[{M}].[{M}].[{M}]>>C(=O)([{M}])[{M}].C(=O)(CO_[{M}])[{M}]	-130.403	67.2892
C(C(O_[{M}])CO_[{M}])([{M}])[{M}].[{M}H]>>C(O_[{M}])(C[{M}])CO_[{M}].[{M}].[{M}]	8.52407	61.3427			C(=O)([{M}])[{M}]>>O=[C:].[{M}].[{M}]	112.836	0
C(O_[{M}])(C[{M}])CO_[{M}].[{M}H]>>C(O_[{M}])(CO_[{M}])C.[{M}].[{M}]	48.0304	95.3181
C(O_[{M}])(CO_[{M}])C>>C(CO)(O)C.[{M}].[{M}]	53.3726	0			the above pathway is of length 8 and contains
					rule OHadsorption2 occurs 1 times
the above pathway is of length 6 and contains					rule CHscission occurs 1 times
rule OHadsorption2 occurs 1 times					rule CHscission2 occurs 1 times
rule OHdesorption2 occurs 1 times					rule CCscission occurs 1 times
rule CHscission occurs 1 times					rule OHscission4 occurs 1 times
rule CHformation occurs 2 times					rule CdoubleOFormation occurs 1 times
rule COScission occurs 1 times					rule CdoubleOFromCOH occurs 1 times
Max Ea is			167.036		rule CarbonMonoxideFormation occurs 1 times
					Max Ea is			85.806
C(CO)(CO)O.[{M}].[{M}]>>C(O_[{M}])(CO)CO_[{M}]	-52.1177	0
C(O_[{M}])(CO)CO_[{M}].[{M}].[{M}]>>C(C(O_[{M}])CO_[{M}])([{M}])O.[{M}H]	-98.5564	1.70947			C(CO)(CO)O.[{M}].[{M}]>>C(O_[{M}])(CO)CO_[{M}]	-52.1177	0
C(C(O_[{M}])CO_[{M}])([{M}])O.[{M}].[{M}]>>C(C(O_[{M}])CO_[{M}])(O[{M}])[{M}].[{M}H]	-12.7724	43.0277			C(O_[{M}])(CO)CO_[{M}].[{M}].[{M}]>>C(C(O_[{M}])CO_[{M}])([{M}])O.[{M}H]	-98.5564	1.70947
C(C(O_[{M}])CO_[{M}])(O[{M}])[{M}].[{M}].[{M}]>>C(C(O_[{M}])CO_[{M}])([{M}])[{M}].O([{M}])[{M}]	-4.19	176.842			C(C(O_[{M}])CO_[{M}])([{M}])O.[{M}].[{M}]>>C(C([{M}])O)(CO_[{M}])([{M}])O.[{M}].[{M}H]	-18.3939	83.4753
C(C(O_[{M}])CO_[{M}])([{M}])[{M}].[{M}H]>>C(O_[{M}])(C[{M}])CO_[{M}].[{M}].[{M}]	8.52407	61.3427			C(C([{M}])O)(CO_[{M}])([{M}])O>>C(=O)(C([{M}])O)CO_[{M}].[{M}H]	18.1975	69.6619
C(O_[{M}])(C[{M}])CO_[{M}].[{M}H]>>C(O_[{M}])(CO_[{M}])C.[{M}].[{M}]	48.0304	95.3181			C(=O)(C([{M}])O)CO_[{M}].[{M}].[{M}]>>C(C(=O)CO_[{M}])([{M}])([{M}])O.[{M}H]	-52.7157	48.467
C(O_[{M}])(CO_[{M}])C>>C(CO)(O)C.[{M}].[{M}]	53.3726	0			C(C(=O)CO_[{M}])([{M}])([{M}])O>>C(=O)(C(=O)CO_[{M}])[{M}].[{M}H]	3.71454	57.2065
					C(=O)(C(=O)CO_[{M}])[{M}].[{M}].[{M}]>>C(=O)([{M}])[{M}].C(=O)(CO_[{M}])[{M}]	-130.403	67.2892
the above pathway is of length 7 and contains					C(=O)([{M}])[{M}]>>O=[C:].[{M}].[{M}]	112.836	0
rule OHadsorption2 occurs 1 times
rule OHdesorption2 occurs 1 times					the above pathway is of length 8 and contains
rule CHscission occurs 1 times					rule OHadsorption2 occurs 1 times
rule OHscission occurs 1 times					rule CHscission occurs 2 times
rule CHformation occurs 2 times					rule CHscission2 occurs 1 times
rule COScission occurs 1 times					rule CCscission occurs 1 times
Max Ea is			176.842		rule CdoubleOFromCOH occurs 2 times
					rule CarbonMonoxideFormation occurs 1 times
C(CO)(CO)O.[{M}].[{M}]>>C(O_[{M}])(CO)CO_[{M}]	-52.1177	0			Max Ea is			83.4753
C(O_[{M}])(CO)CO_[{M}].[{M}].[{M}]>>C(O_[{M}])(CO[{M}])CO_[{M}].[{M}H]	-34.1859	24.6121
C(O_[{M}])(CO[{M}])CO_[{M}].[{M}].[{M}]>>C(C(O_[{M}])CO_[{M}])(O[{M}])[{M}].[{M}H]	-77.143	23.5512			C(CO)(CO)O.[{M}].[{M}]>>C(O_[{M}])(CO)CO_[{M}]	-52.1177	0
C(C(O_[{M}])CO_[{M}])(O[{M}])[{M}].[{M}].[{M}]>>C(C(O_[{M}])CO_[{M}])([{M}])[{M}].O([{M}])[{M}]	-4.19	176.842			C(O_[{M}])(CO)CO_[{M}].[{M}].[{M}]>>C(CO_[{M}])(CO_[{M}])([{M}])O.[{M}H]	-70.5188	30.3078
C(C(O_[{M}])CO_[{M}])([{M}])[{M}].[{M}H]>>C(O_[{M}])(C[{M}])CO_[{M}].[{M}].[{M}]	8.52407	61.3427			C(CO_[{M}])(CO_[{M}])([{M}])O.[{M}].[{M}]>>C(C([{M}])O)(CO_[{M}])([{M}])O.[{M}].[{M}H]	-46.4315	54.8769
C(O_[{M}])(C[{M}])CO_[{M}].[{M}H]>>C(O_[{M}])(CO_[{M}])C.[{M}].[{M}]	48.0304	95.3181			C(C([{M}])O)(CO_[{M}])([{M}])O>>C(=O)(C([{M}])O)CO_[{M}].[{M}H]	18.1975	69.6619
C(O_[{M}])(CO_[{M}])C>>C(CO)(O)C.[{M}].[{M}]	53.3726	0			C(=O)(C([{M}])O)CO_[{M}].[{M}].[{M}]>>C(C(=O)CO_[{M}])([{M}])([{M}])O.[{M}H]	-52.7157	48.467
					C(C(=O)CO_[{M}])([{M}])([{M}])O>>C(=O)(C(=O)CO_[{M}])[{M}].[{M}H]	3.71454	57.2065
the above pathway is of length 7 and contains					C(=O)(C(=O)CO_[{M}])[{M}].[{M}].[{M}]>>C(=O)([{M}])[{M}].C(=O)(CO_[{M}])[{M}]	-130.403	67.2892
rule OHadsorption2 occurs 1 times					C(=O)([{M}])[{M}]>>O=[C:].[{M}].[{M}]	112.836	0
rule OHdesorption2 occurs 1 times
rule CHscission occurs 1 times					the above pathway is of length 8 and contains
rule OHscission occurs 1 times					rule OHadsorption2 occurs 1 times
rule CHformation occurs 2 times					rule CHscission occurs 1 times
rule COScission occurs 1 times					rule CHscission2 occurs 1 times
Max Ea is			176.842		rule CHscission7 occurs 1 times
					rule CCscission occurs 1 times
C(CO)(CO)O.[{M}].[{M}]>>C(O_[{M}])(CO)CO_[{M}]	-52.1177	0			rule CdoubleOFromCOH occurs 2 times
C(O_[{M}])(CO)CO_[{M}].[{M}].[{M}]>>C(C(O_[{M}])CO_[{M}])([{M}])O.[{M}H]	-98.5564	1.70947			rule CarbonMonoxideFormation occurs 1 times
C(C(O_[{M}])CO_[{M}])([{M}])O.[{M}].[{M}]>>C(C([{M}])O)(O_[{M}])C[{M}].[{M}]O.[{M}]	-17.1292	126.104			Max Ea is			69.6619
C(C([{M}])O)(O_[{M}])C[{M}].[{M}H]>>C(O_[{M}])(C[{M}])CO_[{M}].[{M}]	67.8449	103.594
C(O_[{M}])(C[{M}])CO_[{M}].[{M}H]>>C(O_[{M}])(CO_[{M}])C.[{M}].[{M}]	48.0304	95.3181			C(CO)(CO)O.[{M}].[{M}]>>C(O_[{M}])(CO)CO_[{M}]	-52.1177	0
C(O_[{M}])(CO_[{M}])C>>C(CO)(O)C.[{M}].[{M}]	53.3726	0			C(O_[{M}])(CO)CO_[{M}].[{M}].[{M}]>>C(C(O_[{M}])CO_[{M}])([{M}])O.[{M}H]	-98.5564	1.70947
					C(C(O_[{M}])CO_[{M}])([{M}])O.[{M}].[{M}]>>C(C([{M}])O)(CO_[{M}])O[{M}].[{M}].[{M}H]	2.4123	56.0866
the above pathway is of length 6 and contains					C(C([{M}])O)(CO_[{M}])O[{M}]>>C(=O)(C([{M}])O)CO_[{M}].[{M}H]	-2.60866	99.5762
rule OHadsorption2 occurs 1 times					C(=O)(C([{M}])O)CO_[{M}].[{M}].[{M}]>>C(C(=O)CO_[{M}])([{M}])([{M}])O.[{M}H]	-52.7157	48.467
rule OHdesorption2 occurs 1 times					C(C(=O)CO_[{M}])([{M}])([{M}])O>>C(=O)(C(=O)CO_[{M}])[{M}].[{M}H]	3.71454	57.2065
rule CHscission occurs 1 times					C(=O)(C(=O)CO_[{M}])[{M}].[{M}].[{M}]>>C(=O)([{M}])[{M}].C(=O)(CO_[{M}])[{M}]	-130.403	67.2892
rule CHformation occurs 1 times					C(=O)([{M}])[{M}]>>O=[C:].[{M}].[{M}]	112.836	0
rule CHformation2 occurs 1 times
rule COScission2 occurs 1 times					the above pathway is of length 8 and contains
Max Ea is			126.104		rule OHadsorption2 occurs 1 times
					rule CHscission occurs 2 times
C(CO)(CO)O.[{M}].[{M}]>>C(O_[{M}])(CO)CO_[{M}]	-52.1177	0			rule CCscission occurs 1 times
C(O_[{M}])(CO)CO_[{M}].[{M}].[{M}]>>C(C(O_[{M}])CO_[{M}])([{M}])O.[{M}H]	-98.5564	1.70947			rule OHscission2 occurs 1 times
C(C(O_[{M}])CO_[{M}])([{M}])O.[{M}].[{M}]>>C(C([{M}])O)(CO[{M}])O_[{M}].[{M}].[{M}H]	-3.47436	51.0241			rule CdoubleOFormation occurs 1 times
C(C([{M}])O)(CO[{M}])O_[{M}].[{M}].[{M}]>>C(C([{M}])O)(O_[{M}])C[{M}].O([{M}])[{M}]	-72.8089	119.202			rule CdoubleOFromCOH occurs 1 times
C(C([{M}])O)(O_[{M}])C[{M}].[{M}H]>>C(O_[{M}])(C[{M}])CO_[{M}].[{M}]	67.8449	103.594			rule CarbonMonoxideFormation occurs 1 times
C(O_[{M}])(C[{M}])CO_[{M}].[{M}H]>>C(O_[{M}])(CO_[{M}])C.[{M}].[{M}]	48.0304	95.3181			Max Ea is			99.5762
C(O_[{M}])(CO_[{M}])C>>C(CO)(O)C.[{M}].[{M}]	53.3726	0
					C(CO)(CO)O.[{M}].[{M}]>>C(O_[{M}])(CO)CO_[{M}]	-52.1177	0
the above pathway is of length 7 and contains					C(O_[{M}])(CO)CO_[{M}].[{M}].[{M}]>>C(O[{M}])(CO_[{M}])CO_[{M}].[{M}H]	-28.2992	29.6747
rule OHadsorption2 occurs 1 times					C(O[{M}])(CO_[{M}])CO_[{M}].[{M}].[{M}]>>C(C([{M}])O)(CO_[{M}])O[{M}].[{M}].[{M}H]	-67.8449	33.0352
rule OHdesorption2 occurs 1 times					C(C([{M}])O)(CO_[{M}])O[{M}]>>C(=O)(C([{M}])O)CO_[{M}].[{M}H]	-2.60866	99.5762
rule CHscission occurs 1 times					C(=O)(C([{M}])O)CO_[{M}].[{M}].[{M}]>>C(C(=O)CO_[{M}])([{M}])([{M}])O.[{M}H]	-52.7157	48.467
rule OHscission2 occurs 1 times					C(C(=O)CO_[{M}])([{M}])([{M}])O>>C(=O)(C(=O)CO_[{M}])[{M}].[{M}H]	3.71454	57.2065
rule CHformation occurs 1 times					C(=O)(C(=O)CO_[{M}])[{M}].[{M}].[{M}]>>C(=O)([{M}])[{M}].C(=O)(CO_[{M}])[{M}]	-130.403	67.2892
rule CHformation2 occurs 1 times					C(=O)([{M}])[{M}]>>O=[C:].[{M}].[{M}]	112.836	0
rule COScission occurs 1 times
Max Ea is			119.202		the above pathway is of length 8 and contains
					rule OHadsorption2 occurs 1 times
C(CO)(CO)O.[{M}].[{M}]>>C(O_[{M}])(CO)CO_[{M}]	-52.1177	0			rule CHscission occurs 1 times
C(O_[{M}])(CO)CO_[{M}].[{M}].[{M}]>>C(O_[{M}])(CO[{M}])CO_[{M}].[{M}H]	-34.1859	24.6121			rule CHscission2 occurs 1 times
C(O_[{M}])(CO[{M}])CO_[{M}].[{M}].[{M}]>>C(C([{M}])O)(CO[{M}])O_[{M}].[{M}].[{M}H]	-67.8449	33.0352			rule CCscission occurs 1 times
C(C([{M}])O)(CO[{M}])O_[{M}].[{M}].[{M}]>>C(C([{M}])O)(O_[{M}])C[{M}].O([{M}])[{M}]	-72.8089	119.202			rule OHscission4 occurs 1 times
C(C([{M}])O)(O_[{M}])C[{M}].[{M}H]>>C(O_[{M}])(C[{M}])CO_[{M}].[{M}]	67.8449	103.594			rule CdoubleOFormation occurs 1 times
C(O_[{M}])(C[{M}])CO_[{M}].[{M}H]>>C(O_[{M}])(CO_[{M}])C.[{M}].[{M}]	48.0304	95.3181			rule CdoubleOFromCOH occurs 1 times
C(O_[{M}])(CO_[{M}])C>>C(CO)(O)C.[{M}].[{M}]	53.3726	0			rule CarbonMonoxideFormation occurs 1 times
					Max Ea is			99.5762
the above pathway is of length 7 and contains
rule OHadsorption2 occurs 1 times					C(CO)(CO)O.[{M}].[{M}]>>C(O_[{M}])(CO)CO_[{M}]	-52.1177	0
rule OHdesorption2 occurs 1 times					C(O_[{M}])(CO)CO_[{M}].[{M}].[{M}]>>C(CO_[{M}])(CO_[{M}])([{M}])O.[{M}H]	-70.5188	30.3078
rule CHscission2 occurs 1 times					C(CO_[{M}])(CO_[{M}])([{M}])O.[{M}].[{M}]>>C(O[{M}])(CO_[{M}])(CO_[{M}])[{M}].[{M}H]	-12.7724	43.0277
rule OHscission occurs 1 times					C(O[{M}])(CO_[{M}])(CO_[{M}])[{M}].[{M}].[{M}]>>C(=O)(C([{M}])O)CO_[{M}].[{M}].[{M}].[{M}].[{M}H]	-15.4615	86.4663
rule CHformation occurs 1 times					C(=O)(C([{M}])O)CO_[{M}].[{M}].[{M}]>>C(C(=O)CO_[{M}])([{M}])([{M}])O.[{M}H]	-52.7157	48.467
rule CHformation2 occurs 1 times					C(C(=O)CO_[{M}])([{M}])([{M}])O>>C(=O)(C(=O)CO_[{M}])[{M}].[{M}H]	3.71454	57.2065
rule COScission occurs 1 times					C(=O)(C(=O)CO_[{M}])[{M}].[{M}].[{M}]>>C(=O)([{M}])[{M}].C(=O)(CO_[{M}])[{M}]	-130.403	67.2892
Max Ea is			119.202		C(=O)([{M}])[{M}]>>O=[C:].[{M}].[{M}]	112.836	0
C(CO)(CO)O.[{M}].[{M}]>>C(O_[{M}])(CO)CO_[{M}]	-52.1177	0			the above pathway is of length 8 and contains
C(O_[{M}])(CO)CO_[{M}].[{M}].[{M}]>>C(CO_[{M}])(CO_[{M}])([{M}])O.[{M}H]	-70.5188	30.3078			rule OHadsorption2 occurs 1 times
C(CO_[{M}])(CO_[{M}])([{M}])O.[{M}].[{M}]>>C(CO_[{M}])(C[{M}])([{M}])O.[{M}]O.[{M}]	4.28424	140.88			rule CHscission occurs 1 times
C(CO_[{M}])(C[{M}])([{M}])O.[{M}H]>>C(O_[{M}])(C[{M}])CO_[{M}].[{M}]	18.3939	102.605			rule CHscission5 occurs 1 times
C(O_[{M}])(C[{M}])CO_[{M}].[{M}H]>>C(O_[{M}])(CO_[{M}])C.[{M}].[{M}]	48.0304	95.3181			rule CHscission7 occurs 1 times
C(O_[{M}])(CO_[{M}])C>>C(CO)(O)C.[{M}].[{M}]	53.3726	0			rule CCscission occurs 1 times
					rule OHscission occurs 1 times
the above pathway is of length 6 and contains					rule CdoubleOFromCOH occurs 1 times
rule OHadsorption2 occurs 1 times					rule CarbonMonoxideFormation occurs 1 times
rule OHdesorption2 occurs 1 times					Max Ea is			86.4663
rule CHscission7 occurs 1 times
rule CHformation occurs 1 times					C(CO)(CO)O.[{M}].[{M}]>>C(O_[{M}])(CO)CO_[{M}]	-52.1177	0
rule CHformation2 occurs 1 times					C(O_[{M}])(CO)CO_[{M}].[{M}].[{M}]>>C(O[{M}])(CO_[{M}])CO_[{M}].[{M}H]	-28.2992	29.6747
rule COScission2 occurs 1 times					C(O[{M}])(CO_[{M}])CO_[{M}].[{M}].[{M}]>>C(O[{M}])(CO_[{M}])(CO_[{M}])[{M}].[{M}H]	-54.992	46.1451
Max Ea is			140.88		C(O[{M}])(CO_[{M}])(CO_[{M}])[{M}].[{M}].[{M}]>>C(=O)(C([{M}])O)CO_[{M}].[{M}].[{M}].[{M}].[{M}H]	-15.4615	86.4663
					C(=O)(C([{M}])O)CO_[{M}].[{M}].[{M}]>>C(C(=O)CO_[{M}])([{M}])([{M}])O.[{M}H]	-52.7157	48.467
C(CO)(CO)O.[{M}].[{M}]>>C(O_[{M}])(CO)CO_[{M}]	-52.1177	0			C(C(=O)CO_[{M}])([{M}])([{M}])O>>C(=O)(C(=O)CO_[{M}])[{M}].[{M}H]	3.71454	57.2065
C(O_[{M}])(CO)CO_[{M}].[{M}].[{M}]>>C(CO_[{M}])(CO_[{M}])([{M}])O.[{M}H]	-70.5188	30.3078			C(=O)(C(=O)CO_[{M}])[{M}].[{M}].[{M}]>>C(=O)([{M}])[{M}].C(=O)(CO_[{M}])[{M}]	-130.403	67.2892
C(CO_[{M}])(CO_[{M}])([{M}])O.[{M}].[{M}]>>C(CO[{M}])(CO_[{M}])([{M}])O.[{M}].[{M}H]	-3.47436	51.0241			C(=O)([{M}])[{M}]>>O=[C:].[{M}].[{M}]	112.836	0
C(CO[{M}])(CO_[{M}])([{M}])O.[{M}].[{M}]>>C(CO_[{M}])(C[{M}])([{M}])O.O([{M}])[{M}]	-51.3955	137.189
C(CO_[{M}])(C[{M}])([{M}])O.[{M}H]>>C(O_[{M}])(C[{M}])CO_[{M}].[{M}]	18.3939	102.605			the above pathway is of length 8 and contains
C(O_[{M}])(C[{M}])CO_[{M}].[{M}H]>>C(O_[{M}])(CO_[{M}])C.[{M}].[{M}]	48.0304	95.3181			rule OHadsorption2 occurs 1 times
C(O_[{M}])(CO_[{M}])C>>C(CO)(O)C.[{M}].[{M}]	53.3726	0			rule CHscission occurs 2 times
					rule CHscission5 occurs 1 times
the above pathway is of length 7 and contains					rule CCscission occurs 1 times
rule OHadsorption2 occurs 1 times					rule OHscission4 occurs 1 times
rule OHdesorption2 occurs 1 times					rule CdoubleOFromCOH occurs 1 times
rule CHscission7 occurs 1 times					rule CarbonMonoxideFormation occurs 1 times
rule OHscission2 occurs 1 times					Max Ea is			86.4663
rule CHformation occurs 1 times
rule CHformation2 occurs 1 times					C(CO)(CO)O.[{M}].[{M}]>>C(O_[{M}])(CO)CO_[{M}]	-52.1177	0
rule COScission occurs 1 times					C(O_[{M}])(CO)CO_[{M}].[{M}].[{M}]>>C(C(O_[{M}])CO_[{M}])([{M}])O.[{M}H]	-98.5564	1.70947
Max Ea is			137.189		C(C(O_[{M}])CO_[{M}])([{M}])O.[{M}].[{M}]>>C(C(O_[{M}])CO_[{M}])([{M}])([{M}])O.[{M}H]	-39.2155	62.2372
					C(C(O_[{M}])CO_[{M}])([{M}])([{M}])O.[{M}].[{M}]>>C(C(CO_[{M}])([{M}])O)([{M}])([{M}])O.[{M}].[{M}H]	-9.7464	92.2957
C(CO)(CO)O.[{M}].[{M}]>>C(O_[{M}])(CO)CO_[{M}]	-52.1177	0			C(C(CO_[{M}])([{M}])O)([{M}])([{M}])O>>C(C(=O)[{M}])(CO_[{M}])([{M}])O.[{M}H]	-30.1366	28.0945
C(O_[{M}])(CO)CO_[{M}].[{M}].[{M}]>>C(O_[{M}])(CO[{M}])CO_[{M}].[{M}H]	-34.1859	24.6121			C(C(=O)[{M}])(CO_[{M}])([{M}])O>>C(=O)(C(=O)CO_[{M}])[{M}].[{M}H]	29.901	79.7269
C(O_[{M}])(CO[{M}])CO_[{M}].[{M}].[{M}]>>C(CO[{M}])(CO_[{M}])([{M}])O.[{M}].[{M}H]	-39.8073	61.6336			C(=O)(C(=O)CO_[{M}])[{M}].[{M}].[{M}]>>C(=O)([{M}])[{M}].C(=O)(CO_[{M}])[{M}]	-130.403	67.2892
C(CO[{M}])(CO_[{M}])([{M}])O.[{M}].[{M}]>>C(CO_[{M}])(C[{M}])([{M}])O.O([{M}])[{M}]	-51.3955	137.189			C(=O)([{M}])[{M}]>>O=[C:].[{M}].[{M}]	112.836	0
C(CO_[{M}])(C[{M}])([{M}])O.[{M}H]>>C(O_[{M}])(C[{M}])CO_[{M}].[{M}]	18.3939	102.605
C(O_[{M}])(C[{M}])CO_[{M}].[{M}H]>>C(O_[{M}])(CO_[{M}])C.[{M}].[{M}]	48.0304	95.3181			the above pathway is of length 8 and contains
C(O_[{M}])(CO_[{M}])C>>C(CO)(O)C.[{M}].[{M}]	53.3726	0			rule OHadsorption2 occurs 1 times
					rule CHscission occurs 2 times
the above pathway is of length 7 and contains					rule CHscission2 occurs 1 times
rule OHadsorption2 occurs 1 times					rule CCscission occurs 1 times
rule OHdesorption2 occurs 1 times					rule CdoubleOFromCOH occurs 2 times
rule CHscission2 occurs 1 times					rule CarbonMonoxideFormation occurs 1 times
rule OHscission occurs 1 times					Max Ea is			92.2957
rule CHformation occurs 1 times
rule CHformation2 occurs 1 times					C(CO)(CO)O.[{M}].[{M}]>>C(O_[{M}])(CO)CO_[{M}]	-52.1177	0
rule COScission occurs 1 times					C(O_[{M}])(CO)CO_[{M}].[{M}].[{M}]>>C(C(O_[{M}])CO_[{M}])([{M}])O.[{M}H]	-98.5564	1.70947
Max Ea is			137.189		C(C(O_[{M}])CO_[{M}])([{M}])O.[{M}].[{M}]>>C(C([{M}])O)(CO_[{M}])([{M}])O.[{M}].[{M}H]	-18.3939	83.4753
					C(C([{M}])O)(CO_[{M}])([{M}])O.[{M}].[{M}]>>C(C(CO_[{M}])([{M}])O)([{M}])([{M}])O.[{M}H]	-30.568	71.0576
C(CO)(CO)O.[{M}].[{M}]>>C(O_[{M}])(CO)CO_[{M}]	-52.1177	0			C(C(CO_[{M}])([{M}])O)([{M}])([{M}])O>>C(C(=O)[{M}])(CO_[{M}])([{M}])O.[{M}H]	-30.1366	28.0945
C(O_[{M}])(CO)CO_[{M}].[{M}].[{M}]>>C(O_[{M}])(CO[{M}])CO_[{M}].[{M}H]	-34.1859	24.6121			C(C(=O)[{M}])(CO_[{M}])([{M}])O>>C(=O)(C(=O)CO_[{M}])[{M}].[{M}H]	29.901	79.7269
C(O_[{M}])(CO[{M}])CO_[{M}].[{M}].[{M}]>>C(CO[{M}])(O_[{M}])C[{M}].[{M}]O.[{M}]	-17.1292	126.104			C(=O)(C(=O)CO_[{M}])[{M}].[{M}].[{M}]>>C(=O)([{M}])[{M}].C(=O)(CO_[{M}])[{M}]	-130.403	67.2892
C(CO[{M}])(O_[{M}])C[{M}].[{M}H]>>C(O_[{M}])(C[{M}])CO_[{M}].[{M}]	3.47436	53.5256			C(=O)([{M}])[{M}]>>O=[C:].[{M}].[{M}]	112.836	0
C(O_[{M}])(C[{M}])CO_[{M}].[{M}H]>>C(O_[{M}])(CO_[{M}])C.[{M}].[{M}]	48.0304	95.3181
C(O_[{M}])(CO_[{M}])C>>C(CO)(O)C.[{M}].[{M}]	53.3726	0			the above pathway is of length 8 and contains
					rule OHadsorption2 occurs 1 times
the above pathway is of length 6 and contains					rule CHscission occurs 2 times
rule OHadsorption2 occurs 1 times					rule CHscission2 occurs 1 times
rule OHdesorption2 occurs 1 times					rule CCscission occurs 1 times
rule OHscission occurs 1 times					rule CdoubleOFromCOH occurs 2 times
rule CHformation occurs 1 times					rule CarbonMonoxideFormation occurs 1 times
rule OHformation2 occurs 1 times					Max Ea is			83.4753
rule COScission2 occurs 1 times
Max Ea is			126.104		C(CO)(CO)O.[{M}].[{M}]>>C(O_[{M}])(CO)CO_[{M}]	-52.1177	0
					C(O_[{M}])(CO)CO_[{M}].[{M}].[{M}]>>C(CO_[{M}])(CO_[{M}])([{M}])O.[{M}H]	-70.5188	30.3078
C(CO)(CO)O.[{M}].[{M}]>>C(O_[{M}])(CO)CO_[{M}]	-52.1177	0			C(CO_[{M}])(CO_[{M}])([{M}])O.[{M}].[{M}]>>C(C([{M}])O)(CO_[{M}])([{M}])O.[{M}].[{M}H]	-46.4315	54.8769
C(O_[{M}])(CO)CO_[{M}].[{M}].[{M}]>>C(O_[{M}])(CO[{M}])CO_[{M}].[{M}H]	-34.1859	24.6121			C(C([{M}])O)(CO_[{M}])([{M}])O.[{M}].[{M}]>>C(C(CO_[{M}])([{M}])O)([{M}])([{M}])O.[{M}H]	-30.568	71.0576
C(O_[{M}])(CO[{M}])CO_[{M}].[{M}].[{M}]>>C(O_[{M}])(CO[{M}])CO[{M}].[{M}].[{M}H]	-3.47436	51.0241			C(C(CO_[{M}])([{M}])O)([{M}])([{M}])O>>C(C(=O)[{M}])(CO_[{M}])([{M}])O.[{M}H]	-30.1366	28.0945
C(O_[{M}])(CO[{M}])CO[{M}].[{M}].[{M}]>>C(CO[{M}])(O_[{M}])C[{M}].O([{M}])[{M}]	-72.8089	119.202			C(C(=O)[{M}])(CO_[{M}])([{M}])O>>C(=O)(C(=O)CO_[{M}])[{M}].[{M}H]	29.901	79.7269
C(CO[{M}])(O_[{M}])C[{M}].[{M}H]>>C(O_[{M}])(C[{M}])CO_[{M}].[{M}]	3.47436	53.5256			C(=O)(C(=O)CO_[{M}])[{M}].[{M}].[{M}]>>C(=O)([{M}])[{M}].C(=O)(CO_[{M}])[{M}]	-130.403	67.2892
C(O_[{M}])(C[{M}])CO_[{M}].[{M}H]>>C(O_[{M}])(CO_[{M}])C.[{M}].[{M}]	48.0304	95.3181			C(=O)([{M}])[{M}]>>O=[C:].[{M}].[{M}]	112.836	0
C(O_[{M}])(CO_[{M}])C>>C(CO)(O)C.[{M}].[{M}]	53.3726	0
					the above pathway is of length 8 and contains
the above pathway is of length 7 and contains					rule OHadsorption2 occurs 1 times
rule OHadsorption2 occurs 1 times					rule CHscission occurs 1 times
rule OHdesorption2 occurs 1 times					rule CHscission2 occurs 1 times
rule OHscission occurs 1 times					rule CHscission7 occurs 1 times
rule OHscission2 occurs 1 times					rule CCscission occurs 1 times
rule CHformation occurs 1 times					rule CdoubleOFromCOH occurs 2 times
rule OHformation2 occurs 1 times					rule CarbonMonoxideFormation occurs 1 times
rule COScission occurs 1 times					Max Ea is			79.7269
Max Ea is			119.202
					C(CO)(CO)O.[{M}].[{M}]>>C(O_[{M}])(CO)CO_[{M}]	-52.1177	0
C(CO)(CO)O.[{M}].[{M}]>>C(O_[{M}])(CO)CO_[{M}]	-52.1177	0			C(O_[{M}])(CO)CO_[{M}].[{M}].[{M}]>>C(C(O_[{M}])CO_[{M}])([{M}])O.[{M}H]	-98.5564	1.70947
C(O_[{M}])(CO)CO_[{M}].[{M}].[{M}]>>C(O[{M}])(CO_[{M}])CO_[{M}].[{M}H]	-28.2992	29.6747			C(C(O_[{M}])CO_[{M}])([{M}])O.[{M}].[{M}]>>C(C(O_[{M}])CO_[{M}])([{M}])([{M}])O.[{M}H]	-39.2155	62.2372
C(O[{M}])(CO_[{M}])CO_[{M}].[{M}].[{M}]>>C(CO_[{M}])(O[{M}])C[{M}].[{M}]O.[{M}]	-17.1292	126.104			C(C(O_[{M}])CO_[{M}])([{M}])([{M}])O>>C(=O)(C(O_[{M}])CO_[{M}])[{M}].[{M}H]	-13.7914	42.1514
C(CO_[{M}])(O[{M}])C[{M}].[{M}H]>>C(O_[{M}])(C[{M}])CO_[{M}].[{M}]	-2.4123	54.3497			C(=O)(C(O_[{M}])CO_[{M}])[{M}].[{M}].[{M}]>>C(C(=O)[{M}])(CO_[{M}])([{M}])O.[{M}].[{M}H]	-26.0916	75.6235
C(O_[{M}])(C[{M}])CO_[{M}].[{M}H]>>C(O_[{M}])(CO_[{M}])C.[{M}].[{M}]	48.0304	95.3181			C(C(=O)[{M}])(CO_[{M}])([{M}])O>>C(=O)(C(=O)CO_[{M}])[{M}].[{M}H]	29.901	79.7269
C(O_[{M}])(CO_[{M}])C>>C(CO)(O)C.[{M}].[{M}]	53.3726	0			C(=O)(C(=O)CO_[{M}])[{M}].[{M}].[{M}]>>C(=O)([{M}])[{M}].C(=O)(CO_[{M}])[{M}]	-130.403	67.2892
					C(=O)([{M}])[{M}]>>O=[C:].[{M}].[{M}]	112.836	0
the above pathway is of length 6 and contains
rule OHadsorption2 occurs 1 times					the above pathway is of length 8 and contains
rule OHdesorption2 occurs 1 times					rule OHadsorption2 occurs 1 times
rule OHscission4 occurs 1 times					rule CHscission occurs 2 times
rule CHformation occurs 1 times					rule CHscission2 occurs 1 times
rule OHformation2 occurs 1 times					rule CCscission occurs 1 times
rule COScission2 occurs 1 times					rule CdoubleOFromCOH occurs 2 times
Max Ea is			126.104		rule CarbonMonoxideFormation occurs 1 times
					Max Ea is			79.7269
C(CO)(CO)O.[{M}].[{M}]>>C(O_[{M}])(CO)CO_[{M}]	-52.1177	0
C(O_[{M}])(CO)CO_[{M}].[{M}].[{M}]>>C(O_[{M}])(CO[{M}])CO_[{M}].[{M}H]	-34.1859	24.6121			C(CO)(CO)O.[{M}].[{M}]>>C(O_[{M}])(CO)CO_[{M}]	-52.1177	0
C(O_[{M}])(CO[{M}])CO_[{M}].[{M}].[{M}]>>C(O[{M}])(CO[{M}])CO_[{M}].[{M}].[{M}H]	2.4123	56.0866			C(O_[{M}])(CO)CO_[{M}].[{M}].[{M}]>>C(C(O_[{M}])CO_[{M}])([{M}])O.[{M}H]	-98.5564	1.70947
C(O[{M}])(CO[{M}])CO_[{M}].[{M}].[{M}]>>C(CO_[{M}])(O[{M}])C[{M}].O([{M}])[{M}]	-72.8089	119.202			C(C(O_[{M}])CO_[{M}])([{M}])O.[{M}].[{M}]>>C(C(O_[{M}])CO_[{M}])(O[{M}])[{M}].[{M}H]	-12.7724	43.0277
C(CO_[{M}])(O[{M}])C[{M}].[{M}H]>>C(O_[{M}])(C[{M}])CO_[{M}].[{M}]	-2.4123	54.3497			C(C(O_[{M}])CO_[{M}])(O[{M}])[{M}].[{M}].[{M}]>>C(=O)(C(O_[{M}])CO_[{M}])[{M}].[{M}].[{M}].[{M}H]	-40.2344	61.1979
C(O_[{M}])(C[{M}])CO_[{M}].[{M}H]>>C(O_[{M}])(CO_[{M}])C.[{M}].[{M}]	48.0304	95.3181			C(=O)(C(O_[{M}])CO_[{M}])[{M}].[{M}].[{M}]>>C(C(=O)[{M}])(CO_[{M}])([{M}])O.[{M}].[{M}H]	-26.0916	75.6235
C(O_[{M}])(CO_[{M}])C>>C(CO)(O)C.[{M}].[{M}]	53.3726	0			C(C(=O)[{M}])(CO_[{M}])([{M}])O>>C(=O)(C(=O)CO_[{M}])[{M}].[{M}H]	29.901	79.7269
					C(=O)(C(=O)CO_[{M}])[{M}].[{M}].[{M}]>>C(=O)([{M}])[{M}].C(=O)(CO_[{M}])[{M}]	-130.403	67.2892
the above pathway is of length 7 and contains					C(=O)([{M}])[{M}]>>O=[C:].[{M}].[{M}]	112.836	0
rule OHadsorption2 occurs 1 times
rule OHdesorption2 occurs 1 times					the above pathway is of length 8 and contains
rule OHscission occurs 1 times					rule OHadsorption2 occurs 1 times
rule OHscission2 occurs 1 times					rule CHscission occurs 1 times
rule CHformation occurs 1 times					rule CHscission2 occurs 1 times
rule OHformation2 occurs 1 times					rule CHscission4 occurs 1 times
rule COScission occurs 1 times					rule CCscission occurs 1 times
Max Ea is			119.202		rule OHscission occurs 1 times
					rule CdoubleOFromCOH occurs 1 times
C(CO)(CO)O.[{M}].[{M}]>>C(O_[{M}])(CO)CO_[{M}]	-52.1177	0			rule CarbonMonoxideFormation occurs 1 times
C(O_[{M}])(CO)CO_[{M}].[{M}].[{M}]>>C(O[{M}])(CO_[{M}])CO_[{M}].[{M}H]	-28.2992	29.6747			Max Ea is			79.7269
C(O[{M}])(CO_[{M}])CO_[{M}].[{M}].[{M}]>>C(O[{M}])(CO[{M}])CO_[{M}].[{M}].[{M}H]	-3.47436	51.0241
C(O[{M}])(CO[{M}])CO_[{M}].[{M}].[{M}]>>C(CO_[{M}])(O[{M}])C[{M}].O([{M}])[{M}]	-72.8089	119.202			C(CO)(CO)O.[{M}].[{M}]>>C(O_[{M}])(CO)CO_[{M}]	-52.1177	0
C(CO_[{M}])(O[{M}])C[{M}].[{M}H]>>C(O_[{M}])(C[{M}])CO_[{M}].[{M}]	-2.4123	54.3497			C(O_[{M}])(CO)CO_[{M}].[{M}].[{M}]>>C(O_[{M}])(CO[{M}])CO_[{M}].[{M}H]	-34.1859	24.6121
C(O_[{M}])(C[{M}])CO_[{M}].[{M}H]>>C(O_[{M}])(CO_[{M}])C.[{M}].[{M}]	48.0304	95.3181			C(O_[{M}])(CO[{M}])CO_[{M}].[{M}].[{M}]>>C(C(O_[{M}])CO_[{M}])(O[{M}])[{M}].[{M}H]	-77.143	23.5512
C(O_[{M}])(CO_[{M}])C>>C(CO)(O)C.[{M}].[{M}]	53.3726	0			C(C(O_[{M}])CO_[{M}])(O[{M}])[{M}].[{M}].[{M}]>>C(=O)(C(O_[{M}])CO_[{M}])[{M}].[{M}].[{M}].[{M}H]	-40.2344	61.1979
					C(=O)(C(O_[{M}])CO_[{M}])[{M}].[{M}].[{M}]>>C(C(=O)[{M}])(CO_[{M}])([{M}])O.[{M}].[{M}H]	-26.0916	75.6235
the above pathway is of length 7 and contains					C(C(=O)[{M}])(CO_[{M}])([{M}])O>>C(=O)(C(=O)CO_[{M}])[{M}].[{M}H]	29.901	79.7269
rule OHadsorption2 occurs 1 times					C(=O)(C(=O)CO_[{M}])[{M}].[{M}].[{M}]>>C(=O)([{M}])[{M}].C(=O)(CO_[{M}])[{M}]	-130.403	67.2892
rule OHdesorption2 occurs 1 times					C(=O)([{M}])[{M}]>>O=[C:].[{M}].[{M}]	112.836	0
rule OHscission2 occurs 1 times
rule OHscission4 occurs 1 times					the above pathway is of length 8 and contains
rule CHformation occurs 1 times					rule OHadsorption2 occurs 1 times
rule OHformation2 occurs 1 times					rule CHscission occurs 1 times
rule COScission occurs 1 times					rule CHscission2 occurs 1 times
Max Ea is			119.202		rule CHscission4 occurs 1 times
					rule CCscission occurs 1 times
C(CO)(CO)O.[{M}].[{M}]>>C(O_[{M}])(CO)CO_[{M}]	-52.1177	0			rule OHscission occurs 1 times
C(O_[{M}])(CO)CO_[{M}].[{M}].[{M}]>>C(C(O_[{M}])CO_[{M}])([{M}])O.[{M}H]	-98.5564	1.70947			rule CdoubleOFromCOH occurs 1 times
C(C(O_[{M}])CO_[{M}])([{M}])O.[{M}].[{M}]>>C(C([{M}])O)(O_[{M}])C[{M}].[{M}]O.[{M}]	-17.1292	126.104			rule CarbonMonoxideFormation occurs 1 times
C(C([{M}])O)(O_[{M}])C[{M}].[{M}H]>>C(C([{M}])O)(O_[{M}])C.[{M}].[{M}]	48.0304	95.3181			Max Ea is			79.7269
C(C([{M}])O)(O_[{M}])C.[{M}H]>>C(O_[{M}])(CO_[{M}])C.[{M}]	67.8449	103.594
C(O_[{M}])(CO_[{M}])C>>C(CO)(O)C.[{M}].[{M}]	53.3726	0			C(CO)(CO)O.[{M}].[{M}]>>C(O_[{M}])(CO)CO_[{M}]	-52.1177	0
					C(O_[{M}])(CO)CO_[{M}].[{M}].[{M}]>>C(C(O_[{M}])CO_[{M}])([{M}])O.[{M}H]	-98.5564	1.70947
the above pathway is of length 6 and contains					C(C(O_[{M}])CO_[{M}])([{M}])O.[{M}].[{M}]>>C(C(O_[{M}])CO_[{M}])(O[{M}])[{M}].[{M}H]	-12.7724	43.0277
rule OHadsorption2 occurs 1 times					C(C(O_[{M}])CO_[{M}])(O[{M}])[{M}]>>C(=O)(C(O_[{M}])CO_[{M}])[{M}].[{M}H]	-40.2344	61.1979
rule OHdesorption2 occurs 1 times					C(=O)(C(O_[{M}])CO_[{M}])[{M}].[{M}].[{M}]>>C(C(=O)[{M}])(CO_[{M}])([{M}])O.[{M}].[{M}H]	-26.0916	75.6235
rule CHscission occurs 1 times					C(C(=O)[{M}])(CO_[{M}])([{M}])O>>C(=O)(C(=O)CO_[{M}])[{M}].[{M}H]	29.901	79.7269
rule CHformation occurs 1 times					C(=O)(C(=O)CO_[{M}])[{M}].[{M}].[{M}]>>C(=O)([{M}])[{M}].C(=O)(CO_[{M}])[{M}]	-130.403	67.2892
rule CHformation2 occurs 1 times					C(=O)([{M}])[{M}]>>O=[C:].[{M}].[{M}]	112.836	0
rule COScission2 occurs 1 times
Max Ea is			126.104		the above pathway is of length 8 and contains
					rule OHadsorption2 occurs 1 times
C(CO)(CO)O.[{M}].[{M}]>>C(O_[{M}])(CO)CO_[{M}]	-52.1177	0			rule CHscission occurs 1 times
C(O_[{M}])(CO)CO_[{M}].[{M}].[{M}]>>C(O_[{M}])(C[{M}])CO_[{M}].[{M}]O	-47.8407	104.913			rule CHscission2 occurs 1 times
C(O_[{M}])(C[{M}])CO_[{M}].[{M}].[{M}]>>C(C([{M}])O)(O_[{M}])C[{M}].[{M}].[{M}H]	-67.8449	33.0352			rule CCscission occurs 1 times
C(C([{M}])O)(O_[{M}])C[{M}].[{M}H]>>C(C([{M}])O)(O_[{M}])C.[{M}].[{M}]	48.0304	95.3181			rule OHscission occurs 1 times
C(C([{M}])O)(O_[{M}])C.[{M}H]>>C(O_[{M}])(CO_[{M}])C.[{M}]	67.8449	103.594			rule CdoubleOFormation occurs 1 times
C(O_[{M}])(CO_[{M}])C>>C(CO)(O)C.[{M}].[{M}]	53.3726	0			rule CdoubleOFromCOH occurs 1 times
					rule CarbonMonoxideFormation occurs 1 times
the above pathway is of length 6 and contains					Max Ea is			79.7269
rule OHadsorption2 occurs 1 times
rule OHdesorption2 occurs 1 times					C(CO)(CO)O.[{M}].[{M}]>>C(O_[{M}])(CO)CO_[{M}]	-52.1177	0
rule CHscission2 occurs 1 times					C(O_[{M}])(CO)CO_[{M}].[{M}].[{M}]>>C(O_[{M}])(CO[{M}])CO_[{M}].[{M}H]	-34.1859	24.6121
rule CHformation occurs 1 times					C(O_[{M}])(CO[{M}])CO_[{M}].[{M}].[{M}]>>C(C(O_[{M}])CO_[{M}])(O[{M}])[{M}].[{M}H]	-77.143	23.5512
rule CHformation2 occurs 1 times					C(C(O_[{M}])CO_[{M}])(O[{M}])[{M}]>>C(=O)(C(O_[{M}])CO_[{M}])[{M}].[{M}H]	-40.2344	61.1979
rule COScission occurs 1 times					C(=O)(C(O_[{M}])CO_[{M}])[{M}].[{M}].[{M}]>>C(C(=O)[{M}])(CO_[{M}])([{M}])O.[{M}].[{M}H]	-26.0916	75.6235
Max Ea is			104.913		C(C(=O)[{M}])(CO_[{M}])([{M}])O>>C(=O)(C(=O)CO_[{M}])[{M}].[{M}H]	29.901	79.7269
					C(=O)(C(=O)CO_[{M}])[{M}].[{M}].[{M}]>>C(=O)([{M}])[{M}].C(=O)(CO_[{M}])[{M}]	-130.403	67.2892
C(CO)(CO)O.[{M}].[{M}]>>C(O_[{M}])(CO)CO_[{M}]	-52.1177	0			C(=O)([{M}])[{M}]>>O=[C:].[{M}].[{M}]	112.836	0
C(O_[{M}])(CO)CO_[{M}].[{M}].[{M}]>>C(O_[{M}])(CO[{M}])CO_[{M}].[{M}H]	-34.1859	24.6121
C(O_[{M}])(CO[{M}])CO_[{M}].[{M}].[{M}]>>C(O_[{M}])(C[{M}])CO_[{M}].O([{M}])[{M}]	-72.8089	119.202			the above pathway is of length 8 and contains
C(O_[{M}])(C[{M}])CO_[{M}].[{M}].[{M}]>>C(C([{M}])O)(O_[{M}])C[{M}].[{M}].[{M}H]	-67.8449	33.0352			rule OHadsorption2 occurs 1 times
C(C([{M}])O)(O_[{M}])C[{M}].[{M}H]>>C(C([{M}])O)(O_[{M}])C.[{M}].[{M}]	48.0304	95.3181			rule CHscission occurs 1 times
C(C([{M}])O)(O_[{M}])C.[{M}H]>>C(O_[{M}])(CO_[{M}])C.[{M}]	67.8449	103.594			rule CHscission2 occurs 1 times
C(O_[{M}])(CO_[{M}])C>>C(CO)(O)C.[{M}].[{M}]	53.3726	0			rule CCscission occurs 1 times
					rule OHscission occurs 1 times
the above pathway is of length 7 and contains					rule CdoubleOFormation occurs 1 times
rule OHadsorption2 occurs 1 times					rule CdoubleOFromCOH occurs 1 times
rule OHdesorption2 occurs 1 times					rule CarbonMonoxideFormation occurs 1 times
rule CHscission2 occurs 1 times					Max Ea is			79.7269
rule OHscission occurs 1 times
rule CHformation occurs 1 times					C(CO)(CO)O.[{M}].[{M}]>>C(O_[{M}])(CO)CO_[{M}]	-52.1177	0
rule CHformation2 occurs 1 times					C(O_[{M}])(CO)CO_[{M}].[{M}].[{M}]>>C(C(O_[{M}])CO_[{M}])([{M}])O.[{M}H]	-98.5564	1.70947
rule COScission occurs 1 times					C(C(O_[{M}])CO_[{M}])([{M}])O.[{M}].[{M}]>>C(C([{M}])O)(CO_[{M}])([{M}])O.[{M}].[{M}H]	-18.3939	83.4753
Max Ea is			119.202		C(C([{M}])O)(CO_[{M}])([{M}])O>>C(C=O)(CO_[{M}])([{M}])O.[{M}H]	-23.3188	33.9579
					C(C=O)(CO_[{M}])([{M}])O.[{M}].[{M}]>>C(C(=O)[{M}])(CO_[{M}])([{M}])O.[{M}H]	-37.3859	64.1034
C(CO)(CO)O.[{M}].[{M}]>>C(O_[{M}])(CO)CO_[{M}]	-52.1177	0			C(C(=O)[{M}])(CO_[{M}])([{M}])O>>C(=O)(C(=O)CO_[{M}])[{M}].[{M}H]	29.901	79.7269
C(O_[{M}])(CO)CO_[{M}].[{M}].[{M}]>>C(C(O_[{M}])CO_[{M}])([{M}])O.[{M}H]	-98.5564	1.70947			C(=O)(C(=O)CO_[{M}])[{M}].[{M}].[{M}]>>C(=O)([{M}])[{M}].C(=O)(CO_[{M}])[{M}]	-130.403	67.2892
C(C(O_[{M}])CO_[{M}])([{M}])O.[{M}].[{M}]>>C(C([{M}])O)(CO[{M}])O_[{M}].[{M}].[{M}H]	-3.47436	51.0241			C(=O)([{M}])[{M}]>>O=[C:].[{M}].[{M}]	112.836	0
C(C([{M}])O)(CO[{M}])O_[{M}].[{M}].[{M}]>>C(C([{M}])O)(O_[{M}])C[{M}].O([{M}])[{M}]	-72.8089	119.202
C(C([{M}])O)(O_[{M}])C[{M}].[{M}H]>>C(C([{M}])O)(O_[{M}])C.[{M}].[{M}]	48.0304	95.3181			the above pathway is of length 8 and contains
C(C([{M}])O)(O_[{M}])C.[{M}H]>>C(O_[{M}])(CO_[{M}])C.[{M}]	67.8449	103.594			rule OHadsorption2 occurs 1 times
C(O_[{M}])(CO_[{M}])C>>C(CO)(O)C.[{M}].[{M}]	53.3726	0			rule CHscission occurs 2 times
					rule CHscission2 occurs 1 times
the above pathway is of length 7 and contains					rule CCscission occurs 1 times
rule OHadsorption2 occurs 1 times					rule CdoubleOFromCOH occurs 2 times
rule OHdesorption2 occurs 1 times					rule CarbonMonoxideFormation occurs 1 times
rule CHscission occurs 1 times					Max Ea is			83.4753
rule OHscission2 occurs 1 times
rule CHformation occurs 1 times					C(CO)(CO)O.[{M}].[{M}]>>C(O_[{M}])(CO)CO_[{M}]	-52.1177	0
rule CHformation2 occurs 1 times					C(O_[{M}])(CO)CO_[{M}].[{M}].[{M}]>>C(CO_[{M}])(CO_[{M}])([{M}])O.[{M}H]	-70.5188	30.3078
rule COScission occurs 1 times					C(CO_[{M}])(CO_[{M}])([{M}])O.[{M}].[{M}]>>C(C([{M}])O)(CO_[{M}])([{M}])O.[{M}].[{M}H]	-46.4315	54.8769
Max Ea is			119.202		C(C([{M}])O)(CO_[{M}])([{M}])O>>C(C=O)(CO_[{M}])([{M}])O.[{M}H]	-23.3188	33.9579
					C(C=O)(CO_[{M}])([{M}])O.[{M}].[{M}]>>C(C(=O)[{M}])(CO_[{M}])([{M}])O.[{M}H]	-37.3859	64.1034
C(CO)(CO)O.[{M}].[{M}]>>C(O_[{M}])(CO)CO_[{M}]	-52.1177	0			C(C(=O)[{M}])(CO_[{M}])([{M}])O>>C(=O)(C(=O)CO_[{M}])[{M}].[{M}H]	29.901	79.7269
C(O_[{M}])(CO)CO_[{M}].[{M}].[{M}]>>C(O_[{M}])(CO[{M}])CO_[{M}].[{M}H]	-34.1859	24.6121			C(=O)(C(=O)CO_[{M}])[{M}].[{M}].[{M}]>>C(=O)([{M}])[{M}].C(=O)(CO_[{M}])[{M}]	-130.403	67.2892
C(O_[{M}])(CO[{M}])CO_[{M}].[{M}].[{M}]>>C(C([{M}])O)(CO[{M}])O_[{M}].[{M}].[{M}H]	-67.8449	33.0352			C(=O)([{M}])[{M}]>>O=[C:].[{M}].[{M}]	112.836	0
C(C([{M}])O)(CO[{M}])O_[{M}].[{M}].[{M}]>>C(C([{M}])O)(O_[{M}])C[{M}].O([{M}])[{M}]	-72.8089	119.202
C(C([{M}])O)(O_[{M}])C[{M}].[{M}H]>>C(C([{M}])O)(O_[{M}])C.[{M}].[{M}]	48.0304	95.3181			the above pathway is of length 8 and contains
C(C([{M}])O)(O_[{M}])C.[{M}H]>>C(O_[{M}])(CO_[{M}])C.[{M}]	67.8449	103.594			rule OHadsorption2 occurs 1 times
C(O_[{M}])(CO_[{M}])C>>C(CO)(O)C.[{M}].[{M}]	53.3726	0			rule CHscission occurs 1 times
					rule CHscission2 occurs 1 times
the above pathway is of length 7 and contains					rule CHscission7 occurs 1 times
rule OHadsorption2 occurs 1 times					rule CCscission occurs 1 times
rule OHdesorption2 occurs 1 times					rule CdoubleOFromCOH occurs 2 times
rule CHscission2 occurs 1 times					rule CarbonMonoxideFormation occurs 1 times
rule OHscission occurs 1 times					Max Ea is			79.7269
rule CHformation occurs 1 times
rule CHformation2 occurs 1 times					C(CO)(CO)O.[{M}].[{M}]>>C(O_[{M}])(CO)CO_[{M}]	-52.1177	0
rule COScission occurs 1 times					C(O_[{M}])(CO)CO_[{M}].[{M}].[{M}]>>C(C(O_[{M}])CO_[{M}])([{M}])O.[{M}H]	-98.5564	1.70947
Max Ea is			119.202		C(C(O_[{M}])CO_[{M}])([{M}])O.[{M}].[{M}]>>C(C(O_[{M}])CO_[{M}])(O[{M}])[{M}].[{M}H]	-12.7724	43.0277
					C(C(O_[{M}])CO_[{M}])(O[{M}])[{M}].[{M}].[{M}]>>C(C=O)(CO_[{M}])([{M}])O.[{M}].[{M}].[{M}].[{M}H]	-28.9402	72.718
C(CO)(CO)O.[{M}].[{M}]>>C(O_[{M}])(CO)CO_[{M}]	-52.1177	0			C(C=O)(CO_[{M}])([{M}])O.[{M}].[{M}]>>C(C(=O)[{M}])(CO_[{M}])([{M}])O.[{M}H]	-37.3859	64.1034
C(O_[{M}])(CO)CO_[{M}].[{M}].[{M}]>>C(CO_[{M}])(CO_[{M}])([{M}])O.[{M}H]	-70.5188	30.3078			C(C(=O)[{M}])(CO_[{M}])([{M}])O>>C(=O)(C(=O)CO_[{M}])[{M}].[{M}H]	29.901	79.7269
C(CO_[{M}])(CO_[{M}])([{M}])O.[{M}].[{M}]>>C(CO_[{M}])(C[{M}])([{M}])O.[{M}]O.[{M}]	4.28424	140.88			C(=O)(C(=O)CO_[{M}])[{M}].[{M}].[{M}]>>C(=O)([{M}])[{M}].C(=O)(CO_[{M}])[{M}]	-130.403	67.2892
C(CO_[{M}])(C[{M}])([{M}])O.[{M}H]>>C(CO_[{M}])([{M}])(O)C.[{M}].[{M}]	26.6169	76.9026			C(=O)([{M}])[{M}]>>O=[C:].[{M}].[{M}]	112.836	0
C(CO_[{M}])([{M}])(O)C.[{M}H]>>C(O_[{M}])(CO_[{M}])C.[{M}]	39.8073	103.033
C(O_[{M}])(CO_[{M}])C>>C(CO)(O)C.[{M}].[{M}]	53.3726	0			the above pathway is of length 8 and contains
					rule OHadsorption2 occurs 1 times
the above pathway is of length 6 and contains					rule CHscission occurs 2 times
rule OHadsorption2 occurs 1 times					rule CHscission5 occurs 1 times
rule OHdesorption2 occurs 1 times					rule CCscission occurs 1 times
rule CHscission7 occurs 1 times					rule OHscission occurs 1 times
rule CHformation occurs 1 times					rule CdoubleOFromCOH occurs 1 times
rule CHformation2 occurs 1 times					rule CarbonMonoxideFormation occurs 1 times
rule COScission2 occurs 1 times					Max Ea is			79.7269
Max Ea is			140.88
					C(CO)(CO)O.[{M}].[{M}]>>C(O_[{M}])(CO)CO_[{M}]	-52.1177	0
C(CO)(CO)O.[{M}].[{M}]>>C(O_[{M}])(CO)CO_[{M}]	-52.1177	0			C(O_[{M}])(CO)CO_[{M}].[{M}].[{M}]>>C(O_[{M}])(CO[{M}])CO_[{M}].[{M}H]	-34.1859	24.6121
C(O_[{M}])(CO)CO_[{M}].[{M}].[{M}]>>C(O_[{M}])(C[{M}])CO_[{M}].[{M}]O	-47.8407	104.913			C(O_[{M}])(CO[{M}])CO_[{M}].[{M}].[{M}]>>C(C(O_[{M}])CO_[{M}])(O[{M}])[{M}].[{M}H]	-77.143	23.5512
C(O_[{M}])(C[{M}])CO_[{M}].[{M}].[{M}]>>C(CO_[{M}])(C[{M}])([{M}])O.[{M}].[{M}H]	-18.3939	83.4753			C(C(O_[{M}])CO_[{M}])(O[{M}])[{M}].[{M}].[{M}]>>C(C=O)(CO_[{M}])([{M}])O.[{M}].[{M}].[{M}].[{M}H]	-28.9402	72.718
C(CO_[{M}])(C[{M}])([{M}])O.[{M}H]>>C(CO_[{M}])([{M}])(O)C.[{M}].[{M}]	26.6169	76.9026			C(C=O)(CO_[{M}])([{M}])O.[{M}].[{M}]>>C(C(=O)[{M}])(CO_[{M}])([{M}])O.[{M}H]	-37.3859	64.1034
C(CO_[{M}])([{M}])(O)C.[{M}H]>>C(O_[{M}])(CO_[{M}])C.[{M}]	39.8073	103.033			C(C(=O)[{M}])(CO_[{M}])([{M}])O>>C(=O)(C(=O)CO_[{M}])[{M}].[{M}H]	29.901	79.7269
C(O_[{M}])(CO_[{M}])C>>C(CO)(O)C.[{M}].[{M}]	53.3726	0			C(=O)(C(=O)CO_[{M}])[{M}].[{M}].[{M}]>>C(=O)([{M}])[{M}].C(=O)(CO_[{M}])[{M}]	-130.403	67.2892
					C(=O)([{M}])[{M}]>>O=[C:].[{M}].[{M}]	112.836	0
the above pathway is of length 6 and contains
rule OHadsorption2 occurs 1 times					the above pathway is of length 8 and contains
rule OHdesorption2 occurs 1 times					rule OHadsorption2 occurs 1 times
rule CHscission2 occurs 1 times					rule CHscission occurs 2 times
rule CHformation occurs 1 times					rule CHscission5 occurs 1 times
rule CHformation2 occurs 1 times					rule CCscission occurs 1 times
rule COScission occurs 1 times					rule OHscission occurs 1 times
Max Ea is			104.913		rule CdoubleOFromCOH occurs 1 times
					rule CarbonMonoxideFormation occurs 1 times
C(CO)(CO)O.[{M}].[{M}]>>C(O_[{M}])(CO)CO_[{M}]	-52.1177	0			Max Ea is			79.7269
C(O_[{M}])(CO)CO_[{M}].[{M}].[{M}]>>C(O_[{M}])(CO[{M}])CO_[{M}].[{M}H]	-34.1859	24.6121
C(O_[{M}])(CO[{M}])CO_[{M}].[{M}].[{M}]>>C(O_[{M}])(C[{M}])CO_[{M}].O([{M}])[{M}]	-72.8089	119.202			C(CO)(CO)O.[{M}].[{M}]>>C(O_[{M}])(CO)CO_[{M}]	-52.1177	0
C(O_[{M}])(C[{M}])CO_[{M}].[{M}].[{M}]>>C(CO_[{M}])(C[{M}])([{M}])O.[{M}].[{M}H]	-18.3939	83.4753			C(O_[{M}])(CO)CO_[{M}].[{M}].[{M}]>>C(CO_[{M}])(CO_[{M}])([{M}])O.[{M}H]	-70.5188	30.3078
C(CO_[{M}])(C[{M}])([{M}])O.[{M}H]>>C(CO_[{M}])([{M}])(O)C.[{M}].[{M}]	26.6169	76.9026			C(CO_[{M}])(CO_[{M}])([{M}])O.[{M}].[{M}]>>C(CO[{M}])(CO_[{M}])([{M}])O.[{M}].[{M}H]	-3.47436	51.0241
C(CO_[{M}])([{M}])(O)C.[{M}H]>>C(O_[{M}])(CO_[{M}])C.[{M}]	39.8073	103.033			C(CO[{M}])(CO_[{M}])([{M}])O>>C(C=O)(CO_[{M}])([{M}])O.[{M}H]	-66.2759	34.6356
C(O_[{M}])(CO_[{M}])C>>C(CO)(O)C.[{M}].[{M}]	53.3726	0			C(C=O)(CO_[{M}])([{M}])O.[{M}].[{M}]>>C(C(=O)[{M}])(CO_[{M}])([{M}])O.[{M}H]	-37.3859	64.1034
					C(C(=O)[{M}])(CO_[{M}])([{M}])O>>C(=O)(C(=O)CO_[{M}])[{M}].[{M}H]	29.901	79.7269
the above pathway is of length 7 and contains					C(=O)(C(=O)CO_[{M}])[{M}].[{M}].[{M}]>>C(=O)([{M}])[{M}].C(=O)(CO_[{M}])[{M}]	-130.403	67.2892
rule OHadsorption2 occurs 1 times					C(=O)([{M}])[{M}]>>O=[C:].[{M}].[{M}]	112.836	0
rule OHdesorption2 occurs 1 times
rule CHscission2 occurs 1 times					the above pathway is of length 8 and contains
rule OHscission occurs 1 times					rule OHadsorption2 occurs 1 times
rule CHformation occurs 1 times					rule CHscission occurs 1 times
rule CHformation2 occurs 1 times					rule CHscission7 occurs 1 times
rule COScission occurs 1 times					rule CCscission occurs 1 times
Max Ea is			119.202		rule OHscission2 occurs 1 times
					rule CdoubleOFormation occurs 1 times
C(CO)(CO)O.[{M}].[{M}]>>C(O_[{M}])(CO)CO_[{M}]	-52.1177	0			rule CdoubleOFromCOH occurs 1 times
C(O_[{M}])(CO)CO_[{M}].[{M}].[{M}]>>C(CO_[{M}])(CO_[{M}])([{M}])O.[{M}H]	-70.5188	30.3078			rule CarbonMonoxideFormation occurs 1 times
C(CO_[{M}])(CO_[{M}])([{M}])O.[{M}].[{M}]>>C(CO[{M}])(CO_[{M}])([{M}])O.[{M}].[{M}H]	-3.47436	51.0241			Max Ea is			79.7269
C(CO[{M}])(CO_[{M}])([{M}])O.[{M}].[{M}]>>C(CO_[{M}])(C[{M}])([{M}])O.O([{M}])[{M}]	-51.3955	137.189
C(CO_[{M}])(C[{M}])([{M}])O.[{M}H]>>C(CO_[{M}])([{M}])(O)C.[{M}].[{M}]	26.6169	76.9026			C(CO)(CO)O.[{M}].[{M}]>>C(O_[{M}])(CO)CO_[{M}]	-52.1177	0
C(CO_[{M}])([{M}])(O)C.[{M}H]>>C(O_[{M}])(CO_[{M}])C.[{M}]	39.8073	103.033			C(O_[{M}])(CO)CO_[{M}].[{M}].[{M}]>>C(O_[{M}])(CO[{M}])CO_[{M}].[{M}H]	-34.1859	24.6121
C(O_[{M}])(CO_[{M}])C>>C(CO)(O)C.[{M}].[{M}]	53.3726	0			C(O_[{M}])(CO[{M}])CO_[{M}].[{M}].[{M}]>>C(CO[{M}])(CO_[{M}])([{M}])O.[{M}].[{M}H]	-39.8073	61.6336
					C(CO[{M}])(CO_[{M}])([{M}])O>>C(C=O)(CO_[{M}])([{M}])O.[{M}H]	-66.2759	34.6356
the above pathway is of length 7 and contains					C(C=O)(CO_[{M}])([{M}])O.[{M}].[{M}]>>C(C(=O)[{M}])(CO_[{M}])([{M}])O.[{M}H]	-37.3859	64.1034
rule OHadsorption2 occurs 1 times					C(C(=O)[{M}])(CO_[{M}])([{M}])O>>C(=O)(C(=O)CO_[{M}])[{M}].[{M}H]	29.901	79.7269
rule OHdesorption2 occurs 1 times					C(=O)(C(=O)CO_[{M}])[{M}].[{M}].[{M}]>>C(=O)([{M}])[{M}].C(=O)(CO_[{M}])[{M}]	-130.403	67.2892
rule CHscission7 occurs 1 times					C(=O)([{M}])[{M}]>>O=[C:].[{M}].[{M}]	112.836	0
rule OHscission2 occurs 1 times
rule CHformation occurs 1 times					the above pathway is of length 8 and contains
rule CHformation2 occurs 1 times					rule OHadsorption2 occurs 1 times
rule COScission occurs 1 times					rule CHscission occurs 1 times
Max Ea is			137.189		rule CHscission2 occurs 1 times
					rule CCscission occurs 1 times
C(CO)(CO)O.[{M}].[{M}]>>C(O_[{M}])(CO)CO_[{M}]	-52.1177	0			rule OHscission occurs 1 times
C(O_[{M}])(CO)CO_[{M}].[{M}].[{M}]>>C(O_[{M}])(CO[{M}])CO_[{M}].[{M}H]	-34.1859	24.6121			rule CdoubleOFormation occurs 1 times
C(O_[{M}])(CO[{M}])CO_[{M}].[{M}].[{M}]>>C(CO[{M}])(CO_[{M}])([{M}])O.[{M}].[{M}H]	-39.8073	61.6336			rule CdoubleOFromCOH occurs 1 times
C(CO[{M}])(CO_[{M}])([{M}])O.[{M}].[{M}]>>C(CO_[{M}])(C[{M}])([{M}])O.O([{M}])[{M}]	-51.3955	137.189			rule CarbonMonoxideFormation occurs 1 times
C(CO_[{M}])(C[{M}])([{M}])O.[{M}H]>>C(CO_[{M}])([{M}])(O)C.[{M}].[{M}]	26.6169	76.9026			Max Ea is			79.7269
C(CO_[{M}])([{M}])(O)C.[{M}H]>>C(O_[{M}])(CO_[{M}])C.[{M}]	39.8073	103.033
C(O_[{M}])(CO_[{M}])C>>C(CO)(O)C.[{M}].[{M}]	53.3726	0			C(CO)(CO)O.[{M}].[{M}]>>C(O_[{M}])(CO)CO_[{M}]	-52.1177	0
					C(O_[{M}])(CO)CO_[{M}].[{M}].[{M}]>>C(C(O_[{M}])CO_[{M}])([{M}])O.[{M}H]	-98.5564	1.70947
the above pathway is of length 7 and contains					C(C(O_[{M}])CO_[{M}])([{M}])O.[{M}].[{M}]>>C(C(O_[{M}])CO_[{M}])([{M}])([{M}])O.[{M}H]	-39.2155	62.2372
rule OHadsorption2 occurs 1 times					C(C(O_[{M}])CO_[{M}])([{M}])([{M}])O.[{M}].[{M}]>>C(C(O[{M}])CO_[{M}])([{M}])([{M}])O.[{M}].[{M}H]	2.4123	56.0866
rule OHdesorption2 occurs 1 times					C(C(O[{M}])CO_[{M}])([{M}])([{M}])O>>C(=O)(C(CO_[{M}])O[{M}])[{M}].[{M}H]	-13.7914	42.1514
rule CHscission2 occurs 1 times					C(=O)(C(CO_[{M}])O[{M}])[{M}]>>C(=O)(C(=O)CO_[{M}])[{M}].[{M}H]	1.39712	103.662
rule OHscission occurs 1 times					C(=O)(C(=O)CO_[{M}])[{M}].[{M}].[{M}]>>C(=O)([{M}])[{M}].C(=O)(CO_[{M}])[{M}]	-130.403	67.2892
rule CHformation occurs 1 times					C(=O)([{M}])[{M}]>>O=[C:].[{M}].[{M}]	112.836	0
rule CHformation2 occurs 1 times
rule COScission occurs 1 times					the above pathway is of length 8 and contains
Max Ea is			137.189		rule OHadsorption2 occurs 1 times
					rule CHscission occurs 2 times
C(CO)(CO)O.[{M}].[{M}]>>C(O_[{M}])(CO)CO_[{M}]	-52.1177	0			rule CCscission occurs 1 times
C(O_[{M}])(CO)CO_[{M}].[{M}].[{M}]>>C(O_[{M}])(CO[{M}])CO_[{M}].[{M}H]	-34.1859	24.6121			rule OHscission2 occurs 1 times
C(O_[{M}])(CO[{M}])CO_[{M}].[{M}].[{M}]>>C(CO[{M}])(O_[{M}])C[{M}].[{M}]O.[{M}]	-17.1292	126.104			rule CdoubleOFormation occurs 1 times
C(CO[{M}])(O_[{M}])C[{M}].[{M}H]>>C(CO[{M}])(O_[{M}])C.[{M}].[{M}]	48.0304	95.3181			rule CdoubleOFromCOH occurs 1 times
C(CO[{M}])(O_[{M}])C.[{M}H]>>C(O_[{M}])(CO_[{M}])C.[{M}]	3.47436	53.5256			rule CarbonMonoxideFormation occurs 1 times
C(O_[{M}])(CO_[{M}])C>>C(CO)(O)C.[{M}].[{M}]	53.3726	0			Max Ea is			103.662
the above pathway is of length 6 and contains					C(CO)(CO)O.[{M}].[{M}]>>C(O_[{M}])(CO)CO_[{M}]	-52.1177	0
rule OHadsorption2 occurs 1 times					C(O_[{M}])(CO)CO_[{M}].[{M}].[{M}]>>C(C(O_[{M}])CO_[{M}])([{M}])O.[{M}H]	-98.5564	1.70947
rule OHdesorption2 occurs 1 times					C(C(O_[{M}])CO_[{M}])([{M}])O.[{M}].[{M}]>>C(C([{M}])O)(CO_[{M}])O[{M}].[{M}].[{M}H]	2.4123	56.0866
rule OHscission occurs 1 times					C(C([{M}])O)(CO_[{M}])O[{M}].[{M}].[{M}]>>C(C(O[{M}])CO_[{M}])([{M}])([{M}])O.[{M}H]	-39.2155	62.2372
rule CHformation occurs 1 times					C(C(O[{M}])CO_[{M}])([{M}])([{M}])O>>C(=O)(C(CO_[{M}])O[{M}])[{M}].[{M}H]	-13.7914	42.1514
rule OHformation2 occurs 1 times					C(=O)(C(CO_[{M}])O[{M}])[{M}]>>C(=O)(C(=O)CO_[{M}])[{M}].[{M}H]	1.39712	103.662
rule COScission2 occurs 1 times					C(=O)(C(=O)CO_[{M}])[{M}].[{M}].[{M}]>>C(=O)([{M}])[{M}].C(=O)(CO_[{M}])[{M}]	-130.403	67.2892
Max Ea is			126.104		C(=O)([{M}])[{M}]>>O=[C:].[{M}].[{M}]	112.836	0
C(CO)(CO)O.[{M}].[{M}]>>C(O_[{M}])(CO)CO_[{M}]	-52.1177	0			the above pathway is of length 8 and contains
C(O_[{M}])(CO)CO_[{M}].[{M}].[{M}]>>C(O_[{M}])(C[{M}])CO_[{M}].[{M}]O	-47.8407	104.913			rule OHadsorption2 occurs 1 times
C(O_[{M}])(C[{M}])CO_[{M}].[{M}].[{M}]>>C(CO[{M}])(O_[{M}])C[{M}].[{M}].[{M}H]	-3.47436	51.0241			rule CHscission occurs 2 times
C(CO[{M}])(O_[{M}])C[{M}].[{M}H]>>C(CO[{M}])(O_[{M}])C.[{M}].[{M}]	48.0304	95.3181			rule CCscission occurs 1 times
C(CO[{M}])(O_[{M}])C.[{M}H]>>C(O_[{M}])(CO_[{M}])C.[{M}]	3.47436	53.5256			rule OHscission2 occurs 1 times
C(O_[{M}])(CO_[{M}])C>>C(CO)(O)C.[{M}].[{M}]	53.3726	0			rule CdoubleOFormation occurs 1 times
					rule CdoubleOFromCOH occurs 1 times
the above pathway is of length 6 and contains					rule CarbonMonoxideFormation occurs 1 times
rule OHadsorption2 occurs 1 times					Max Ea is			103.662
rule OHdesorption2 occurs 1 times
rule OHscission2 occurs 1 times					C(CO)(CO)O.[{M}].[{M}]>>C(O_[{M}])(CO)CO_[{M}]	-52.1177	0
rule CHformation occurs 1 times					C(O_[{M}])(CO)CO_[{M}].[{M}].[{M}]>>C(O[{M}])(CO_[{M}])CO_[{M}].[{M}H]	-28.2992	29.6747
rule OHformation2 occurs 1 times					C(O[{M}])(CO_[{M}])CO_[{M}].[{M}].[{M}]>>C(C([{M}])O)(CO_[{M}])O[{M}].[{M}].[{M}H]	-67.8449	33.0352
rule COScission occurs 1 times					C(C([{M}])O)(CO_[{M}])O[{M}].[{M}].[{M}]>>C(C(O[{M}])CO_[{M}])([{M}])([{M}])O.[{M}H]	-39.2155	62.2372
Max Ea is			104.913		C(C(O[{M}])CO_[{M}])([{M}])([{M}])O>>C(=O)(C(CO_[{M}])O[{M}])[{M}].[{M}H]	-13.7914	42.1514
					C(=O)(C(CO_[{M}])O[{M}])[{M}]>>C(=O)(C(=O)CO_[{M}])[{M}].[{M}H]	1.39712	103.662
C(CO)(CO)O.[{M}].[{M}]>>C(O_[{M}])(CO)CO_[{M}]	-52.1177	0			C(=O)(C(=O)CO_[{M}])[{M}].[{M}].[{M}]>>C(=O)([{M}])[{M}].C(=O)(CO_[{M}])[{M}]	-130.403	67.2892
C(O_[{M}])(CO)CO_[{M}].[{M}].[{M}]>>C(O_[{M}])(CO[{M}])CO_[{M}].[{M}H]	-34.1859	24.6121			C(=O)([{M}])[{M}]>>O=[C:].[{M}].[{M}]	112.836	0
C(O_[{M}])(CO[{M}])CO_[{M}].[{M}].[{M}]>>C(O_[{M}])(C[{M}])CO_[{M}].O([{M}])[{M}]	-72.8089	119.202
C(O_[{M}])(C[{M}])CO_[{M}].[{M}].[{M}]>>C(CO[{M}])(O_[{M}])C[{M}].[{M}].[{M}H]	-3.47436	51.0241			the above pathway is of length 8 and contains
C(CO[{M}])(O_[{M}])C[{M}].[{M}H]>>C(CO[{M}])(O_[{M}])C.[{M}].[{M}]	48.0304	95.3181			rule OHadsorption2 occurs 1 times
C(CO[{M}])(O_[{M}])C.[{M}H]>>C(O_[{M}])(CO_[{M}])C.[{M}]	3.47436	53.5256			rule CHscission occurs 1 times
C(O_[{M}])(CO_[{M}])C>>C(CO)(O)C.[{M}].[{M}]	53.3726	0			rule CHscission2 occurs 1 times
					rule CCscission occurs 1 times
the above pathway is of length 7 and contains					rule OHscission4 occurs 1 times
rule OHadsorption2 occurs 1 times					rule CdoubleOFormation occurs 1 times
rule OHdesorption2 occurs 1 times					rule CdoubleOFromCOH occurs 1 times
rule OHscission occurs 1 times					rule CarbonMonoxideFormation occurs 1 times
rule OHscission2 occurs 1 times					Max Ea is			103.662
rule CHformation occurs 1 times
rule OHformation2 occurs 1 times					C(CO)(CO)O.[{M}].[{M}]>>C(O_[{M}])(CO)CO_[{M}]	-52.1177	0
rule COScission occurs 1 times					C(O_[{M}])(CO)CO_[{M}].[{M}].[{M}]>>C(C(O_[{M}])CO_[{M}])([{M}])O.[{M}H]	-98.5564	1.70947
Max Ea is			119.202		C(C(O_[{M}])CO_[{M}])([{M}])O.[{M}].[{M}]>>C(C(O_[{M}])CO_[{M}])([{M}])([{M}])O.[{M}H]	-39.2155	62.2372
					C(C(O_[{M}])CO_[{M}])([{M}])([{M}])O>>C(=O)(C(O_[{M}])CO_[{M}])[{M}].[{M}H]	-13.7914	42.1514
C(CO)(CO)O.[{M}].[{M}]>>C(O_[{M}])(CO)CO_[{M}]	-52.1177	0			C(=O)(C(O_[{M}])CO_[{M}])[{M}].[{M}].[{M}]>>C(=O)(C(CO_[{M}])O[{M}])[{M}].[{M}].[{M}H]	2.4123	56.0866
C(O_[{M}])(CO)CO_[{M}].[{M}].[{M}]>>C(O_[{M}])(CO[{M}])CO_[{M}].[{M}H]	-34.1859	24.6121			C(=O)(C(CO_[{M}])O[{M}])[{M}]>>C(=O)(C(=O)CO_[{M}])[{M}].[{M}H]	1.39712	103.662
C(O_[{M}])(CO[{M}])CO_[{M}].[{M}].[{M}]>>C(O_[{M}])(CO[{M}])CO[{M}].[{M}].[{M}H]	-3.47436	51.0241			C(=O)(C(=O)CO_[{M}])[{M}].[{M}].[{M}]>>C(=O)([{M}])[{M}].C(=O)(CO_[{M}])[{M}]	-130.403	67.2892
C(O_[{M}])(CO[{M}])CO[{M}].[{M}].[{M}]>>C(CO[{M}])(O_[{M}])C[{M}].O([{M}])[{M}]	-72.8089	119.202			C(=O)([{M}])[{M}]>>O=[C:].[{M}].[{M}]	112.836	0
C(CO[{M}])(O_[{M}])C[{M}].[{M}H]>>C(CO[{M}])(O_[{M}])C.[{M}].[{M}]	48.0304	95.3181
C(CO[{M}])(O_[{M}])C.[{M}H]>>C(O_[{M}])(CO_[{M}])C.[{M}]	3.47436	53.5256			the above pathway is of length 8 and contains
C(O_[{M}])(CO_[{M}])C>>C(CO)(O)C.[{M}].[{M}]	53.3726	0			rule OHadsorption2 occurs 1 times
					rule CHscission occurs 2 times
the above pathway is of length 7 and contains					rule CCscission occurs 1 times
rule OHadsorption2 occurs 1 times					rule OHscission2 occurs 1 times
rule OHdesorption2 occurs 1 times					rule CdoubleOFormation occurs 1 times
rule OHscission occurs 1 times					rule CdoubleOFromCOH occurs 1 times
rule OHscission2 occurs 1 times					rule CarbonMonoxideFormation occurs 1 times
rule CHformation occurs 1 times					Max Ea is			103.662
rule OHformation2 occurs 1 times
rule COScission occurs 1 times					C(CO)(CO)O.[{M}].[{M}]>>C(O_[{M}])(CO)CO_[{M}]	-52.1177	0
Max Ea is			119.202		C(O_[{M}])(CO)CO_[{M}].[{M}].[{M}]>>C(C(O_[{M}])CO_[{M}])([{M}])O.[{M}H]	-98.5564	1.70947
					C(C(O_[{M}])CO_[{M}])([{M}])O.[{M}].[{M}]>>C(C(O_[{M}])CO_[{M}])(O[{M}])[{M}].[{M}H]	-12.7724	43.0277
C(CO)(CO)O.[{M}].[{M}]>>C(O_[{M}])(CO)CO_[{M}]	-52.1177	0			C(C(O_[{M}])CO_[{M}])(O[{M}])[{M}].[{M}].[{M}]>>C(=O)(C(O_[{M}])CO_[{M}])[{M}].[{M}].[{M}].[{M}H]	-40.2344	61.1979
C(O_[{M}])(CO)CO_[{M}].[{M}].[{M}]>>C(O[{M}])(CO_[{M}])CO_[{M}].[{M}H]	-28.2992	29.6747			C(=O)(C(O_[{M}])CO_[{M}])[{M}].[{M}].[{M}]>>C(=O)(C(CO_[{M}])O[{M}])[{M}].[{M}].[{M}H]	2.4123	56.0866
C(O[{M}])(CO_[{M}])CO_[{M}].[{M}].[{M}]>>C(CO_[{M}])(O[{M}])C[{M}].[{M}]O.[{M}]	-17.1292	126.104			C(=O)(C(CO_[{M}])O[{M}])[{M}]>>C(=O)(C(=O)CO_[{M}])[{M}].[{M}H]	1.39712	103.662
C(CO_[{M}])(O[{M}])C[{M}].[{M}H]>>C(CO_[{M}])(O[{M}])C.[{M}].[{M}]	48.0304	95.3181			C(=O)(C(=O)CO_[{M}])[{M}].[{M}].[{M}]>>C(=O)([{M}])[{M}].C(=O)(CO_[{M}])[{M}]	-130.403	67.2892
C(CO_[{M}])(O[{M}])C.[{M}H]>>C(O_[{M}])(CO_[{M}])C.[{M}]	-2.4123	54.3497			C(=O)([{M}])[{M}]>>O=[C:].[{M}].[{M}]	112.836	0
C(O_[{M}])(CO_[{M}])C>>C(CO)(O)C.[{M}].[{M}]	53.3726	0
					the above pathway is of length 8 and contains
the above pathway is of length 6 and contains					rule OHadsorption2 occurs 1 times
rule OHadsorption2 occurs 1 times					rule CHscission occurs 1 times
rule OHdesorption2 occurs 1 times					rule CHscission4 occurs 1 times
rule OHscission4 occurs 1 times					rule CCscission occurs 1 times
rule CHformation occurs 1 times					rule OHscission occurs 1 times
rule OHformation2 occurs 1 times					rule OHscission2 occurs 1 times
rule COScission2 occurs 1 times					rule CdoubleOFormation occurs 1 times
Max Ea is			126.104		rule CarbonMonoxideFormation occurs 1 times
					Max Ea is			103.662
C(CO)(CO)O.[{M}].[{M}]>>C(O_[{M}])(CO)CO_[{M}]	-52.1177	0
C(O_[{M}])(CO)CO_[{M}].[{M}].[{M}]>>C(O_[{M}])(C[{M}])CO_[{M}].[{M}]O	-47.8407	104.913			C(CO)(CO)O.[{M}].[{M}]>>C(O_[{M}])(CO)CO_[{M}]	-52.1177	0
C(O_[{M}])(C[{M}])CO_[{M}].[{M}].[{M}]>>C(CO_[{M}])(O[{M}])C[{M}].[{M}].[{M}H]	2.4123	56.0866			C(O_[{M}])(CO)CO_[{M}].[{M}].[{M}]>>C(O_[{M}])(CO[{M}])CO_[{M}].[{M}H]	-34.1859	24.6121
C(CO_[{M}])(O[{M}])C[{M}].[{M}H]>>C(CO_[{M}])(O[{M}])C.[{M}].[{M}]	48.0304	95.3181			C(O_[{M}])(CO[{M}])CO_[{M}].[{M}].[{M}]>>C(C(O_[{M}])CO_[{M}])(O[{M}])[{M}].[{M}H]	-77.143	23.5512
C(CO_[{M}])(O[{M}])C.[{M}H]>>C(O_[{M}])(CO_[{M}])C.[{M}]	-2.4123	54.3497			C(C(O_[{M}])CO_[{M}])(O[{M}])[{M}].[{M}].[{M}]>>C(=O)(C(O_[{M}])CO_[{M}])[{M}].[{M}].[{M}].[{M}H]	-40.2344	61.1979
C(O_[{M}])(CO_[{M}])C>>C(CO)(O)C.[{M}].[{M}]	53.3726	0			C(=O)(C(O_[{M}])CO_[{M}])[{M}].[{M}].[{M}]>>C(=O)(C(CO_[{M}])O[{M}])[{M}].[{M}].[{M}H]	2.4123	56.0866
					C(=O)(C(CO_[{M}])O[{M}])[{M}]>>C(=O)(C(=O)CO_[{M}])[{M}].[{M}H]	1.39712	103.662
the above pathway is of length 6 and contains					C(=O)(C(=O)CO_[{M}])[{M}].[{M}].[{M}]>>C(=O)([{M}])[{M}].C(=O)(CO_[{M}])[{M}]	-130.403	67.2892
rule OHadsorption2 occurs 1 times					C(=O)([{M}])[{M}]>>O=[C:].[{M}].[{M}]	112.836	0
rule OHdesorption2 occurs 1 times
rule OHscission2 occurs 1 times					the above pathway is of length 8 and contains
rule CHformation occurs 1 times					rule OHadsorption2 occurs 1 times
rule OHformation2 occurs 1 times					rule CHscission occurs 1 times
rule COScission occurs 1 times					rule CHscission4 occurs 1 times
Max Ea is			104.913		rule CCscission occurs 1 times
					rule OHscission occurs 1 times
C(CO)(CO)O.[{M}].[{M}]>>C(O_[{M}])(CO)CO_[{M}]	-52.1177	0			rule OHscission2 occurs 1 times
C(O_[{M}])(CO)CO_[{M}].[{M}].[{M}]>>C(O_[{M}])(CO[{M}])CO_[{M}].[{M}H]	-34.1859	24.6121			rule CdoubleOFormation occurs 1 times
C(O_[{M}])(CO[{M}])CO_[{M}].[{M}].[{M}]>>C(O_[{M}])(C[{M}])CO_[{M}].O([{M}])[{M}]	-72.8089	119.202			rule CarbonMonoxideFormation occurs 1 times
C(O_[{M}])(C[{M}])CO_[{M}].[{M}].[{M}]>>C(CO_[{M}])(O[{M}])C[{M}].[{M}].[{M}H]	2.4123	56.0866			Max Ea is			103.662
C(CO_[{M}])(O[{M}])C[{M}].[{M}H]>>C(CO_[{M}])(O[{M}])C.[{M}].[{M}]	48.0304	95.3181
C(CO_[{M}])(O[{M}])C.[{M}H]>>C(O_[{M}])(CO_[{M}])C.[{M}]	-2.4123	54.3497			C(CO)(CO)O.[{M}].[{M}]>>C(O_[{M}])(CO)CO_[{M}]	-52.1177	0
C(O_[{M}])(CO_[{M}])C>>C(CO)(O)C.[{M}].[{M}]	53.3726	0			C(O_[{M}])(CO)CO_[{M}].[{M}].[{M}]>>C(C(O_[{M}])CO_[{M}])([{M}])O.[{M}H]	-98.5564	1.70947
					C(C(O_[{M}])CO_[{M}])([{M}])O.[{M}].[{M}]>>C(C(O_[{M}])CO_[{M}])(O[{M}])[{M}].[{M}H]	-12.7724	43.0277
the above pathway is of length 7 and contains					C(C(O_[{M}])CO_[{M}])(O[{M}])[{M}]>>C(=O)(C(O_[{M}])CO_[{M}])[{M}].[{M}H]	-40.2344	61.1979
rule OHadsorption2 occurs 1 times					C(=O)(C(O_[{M}])CO_[{M}])[{M}].[{M}].[{M}]>>C(=O)(C(CO_[{M}])O[{M}])[{M}].[{M}].[{M}H]	2.4123	56.0866
rule OHdesorption2 occurs 1 times					C(=O)(C(CO_[{M}])O[{M}])[{M}]>>C(=O)(C(=O)CO_[{M}])[{M}].[{M}H]	1.39712	103.662
rule OHscission occurs 1 times					C(=O)(C(=O)CO_[{M}])[{M}].[{M}].[{M}]>>C(=O)([{M}])[{M}].C(=O)(CO_[{M}])[{M}]	-130.403	67.2892
rule OHscission2 occurs 1 times					C(=O)([{M}])[{M}]>>O=[C:].[{M}].[{M}]	112.836	0
rule CHformation occurs 1 times
rule OHformation2 occurs 1 times					the above pathway is of length 8 and contains
rule COScission occurs 1 times					rule OHadsorption2 occurs 1 times
Max Ea is			119.202		rule CHscission occurs 1 times
					rule CCscission occurs 1 times
C(CO)(CO)O.[{M}].[{M}]>>C(O_[{M}])(CO)CO_[{M}]	-52.1177	0			rule OHscission occurs 1 times
C(O_[{M}])(CO)CO_[{M}].[{M}].[{M}]>>C(O_[{M}])(CO[{M}])CO_[{M}].[{M}H]	-34.1859	24.6121			rule OHscission2 occurs 1 times
C(O_[{M}])(CO[{M}])CO_[{M}].[{M}].[{M}]>>C(O[{M}])(CO[{M}])CO_[{M}].[{M}].[{M}H]	2.4123	56.0866			rule CdoubleOFormation occurs 2 times
C(O[{M}])(CO[{M}])CO_[{M}].[{M}].[{M}]>>C(CO_[{M}])(O[{M}])C[{M}].O([{M}])[{M}]	-72.8089	119.202			rule CarbonMonoxideFormation occurs 1 times
C(CO_[{M}])(O[{M}])C[{M}].[{M}H]>>C(CO_[{M}])(O[{M}])C.[{M}].[{M}]	48.0304	95.3181			Max Ea is			103.662
C(CO_[{M}])(O[{M}])C.[{M}H]>>C(O_[{M}])(CO_[{M}])C.[{M}]	-2.4123	54.3497
C(O_[{M}])(CO_[{M}])C>>C(CO)(O)C.[{M}].[{M}]	53.3726	0			C(CO)(CO)O.[{M}].[{M}]>>C(O_[{M}])(CO)CO_[{M}]	-52.1177	0
					C(O_[{M}])(CO)CO_[{M}].[{M}].[{M}]>>C(O_[{M}])(CO[{M}])CO_[{M}].[{M}H]	-34.1859	24.6121
the above pathway is of length 7 and contains					C(O_[{M}])(CO[{M}])CO_[{M}].[{M}].[{M}]>>C(C(O_[{M}])CO_[{M}])(O[{M}])[{M}].[{M}H]	-77.143	23.5512
rule OHadsorption2 occurs 1 times					C(C(O_[{M}])CO_[{M}])(O[{M}])[{M}]>>C(=O)(C(O_[{M}])CO_[{M}])[{M}].[{M}H]	-40.2344	61.1979
rule OHdesorption2 occurs 1 times					C(=O)(C(O_[{M}])CO_[{M}])[{M}].[{M}].[{M}]>>C(=O)(C(CO_[{M}])O[{M}])[{M}].[{M}].[{M}H]	2.4123	56.0866
rule OHscission occurs 1 times					C(=O)(C(CO_[{M}])O[{M}])[{M}]>>C(=O)(C(=O)CO_[{M}])[{M}].[{M}H]	1.39712	103.662
rule OHscission2 occurs 1 times					C(=O)(C(=O)CO_[{M}])[{M}].[{M}].[{M}]>>C(=O)([{M}])[{M}].C(=O)(CO_[{M}])[{M}]	-130.403	67.2892
rule CHformation occurs 1 times					C(=O)([{M}])[{M}]>>O=[C:].[{M}].[{M}]	112.836	0
rule OHformation2 occurs 1 times
rule COScission occurs 1 times					the above pathway is of length 8 and contains
Max Ea is			119.202		rule OHadsorption2 occurs 1 times
					rule CHscission occurs 1 times
C(CO)(CO)O.[{M}].[{M}]>>C(O_[{M}])(CO)CO_[{M}]	-52.1177	0			rule CCscission occurs 1 times
C(O_[{M}])(CO)CO_[{M}].[{M}].[{M}]>>C(O[{M}])(CO_[{M}])CO_[{M}].[{M}H]	-28.2992	29.6747			rule OHscission occurs 1 times
C(O[{M}])(CO_[{M}])CO_[{M}].[{M}].[{M}]>>C(O[{M}])(CO[{M}])CO_[{M}].[{M}].[{M}H]	-3.47436	51.0241			rule OHscission2 occurs 1 times
C(O[{M}])(CO[{M}])CO_[{M}].[{M}].[{M}]>>C(CO_[{M}])(O[{M}])C[{M}].O([{M}])[{M}]	-72.8089	119.202			rule CdoubleOFormation occurs 2 times
C(CO_[{M}])(O[{M}])C[{M}].[{M}H]>>C(CO_[{M}])(O[{M}])C.[{M}].[{M}]	48.0304	95.3181			rule CarbonMonoxideFormation occurs 1 times
C(CO_[{M}])(O[{M}])C.[{M}H]>>C(O_[{M}])(CO_[{M}])C.[{M}]	-2.4123	54.3497			Max Ea is			103.662
C(O_[{M}])(CO_[{M}])C>>C(CO)(O)C.[{M}].[{M}]	53.3726	0
					C(CO)(CO)O.[{M}].[{M}]>>C(O_[{M}])(CO)CO_[{M}]	-52.1177	0
the above pathway is of length 7 and contains					C(O_[{M}])(CO)CO_[{M}].[{M}].[{M}]>>C(C(O_[{M}])CO_[{M}])([{M}])O.[{M}H]	-98.5564	1.70947
rule OHadsorption2 occurs 1 times					C(C(O_[{M}])CO_[{M}])([{M}])O.[{M}].[{M}]>>C(C(O_[{M}])CO_[{M}])(O[{M}])[{M}].[{M}H]	-12.7724	43.0277
rule OHdesorption2 occurs 1 times					C(C(O_[{M}])CO_[{M}])(O[{M}])[{M}].[{M}].[{M}]>>C(C(O[{M}])CO_[{M}])(O[{M}])[{M}].[{M}].[{M}H]	2.4123	56.0866
rule OHscission2 occurs 1 times					C(C(O[{M}])CO_[{M}])(O[{M}])[{M}].[{M}].[{M}]>>C(=O)(C(CO_[{M}])O[{M}])[{M}].[{M}].[{M}].[{M}H]	-40.2344	61.1979
rule OHscission4 occurs 1 times					C(=O)(C(CO_[{M}])O[{M}])[{M}]>>C(=O)(C(=O)CO_[{M}])[{M}].[{M}H]	1.39712	103.662
rule CHformation occurs 1 times					C(=O)(C(=O)CO_[{M}])[{M}].[{M}].[{M}]>>C(=O)([{M}])[{M}].C(=O)(CO_[{M}])[{M}]	-130.403	67.2892
rule OHformation2 occurs 1 times					C(=O)([{M}])[{M}]>>O=[C:].[{M}].[{M}]	112.836	0
rule COScission occurs 1 times
Max Ea is			119.202		the above pathway is of length 8 and contains
					rule OHadsorption2 occurs 1 times
total valid pathways is 39					rule CHscission occurs 1 times
total distinct pathways is 39					rule CHscission4 occurs 1 times
2 pathways from C(CO)(CO)O containing					rule CCscission occurs 1 times
1of rule OHadsorption2					rule OHscission occurs 1 times
1of rule OHdesorption2					rule OHscission2 occurs 1 times
1of rule OHscission2					rule CdoubleOFormation occurs 1 times
1of rule CHformation					rule CarbonMonoxideFormation occurs 1 times
1of rule OHformation2					Max Ea is			103.662
1of rule COScission
					C(CO)(CO)O.[{M}].[{M}]>>C(O_[{M}])(CO)CO_[{M}]	-52.1177	0
2 pathways from C(CO)(CO)O containing					C(O_[{M}])(CO)CO_[{M}].[{M}].[{M}]>>C(O_[{M}])(CO[{M}])CO_[{M}].[{M}H]	-34.1859	24.6121
1of rule OHadsorption2					C(O_[{M}])(CO[{M}])CO_[{M}].[{M}].[{M}]>>C(C(O_[{M}])CO_[{M}])(O[{M}])[{M}].[{M}H]	-77.143	23.5512
1of rule OHdesorption2					C(C(O_[{M}])CO_[{M}])(O[{M}])[{M}].[{M}].[{M}]>>C(C(O[{M}])CO_[{M}])(O[{M}])[{M}].[{M}].[{M}H]	2.4123	56.0866
1of rule CHscission7					C(C(O[{M}])CO_[{M}])(O[{M}])[{M}].[{M}].[{M}]>>C(=O)(C(CO_[{M}])O[{M}])[{M}].[{M}].[{M}].[{M}H]	-40.2344	61.1979
1of rule CHformation					C(=O)(C(CO_[{M}])O[{M}])[{M}]>>C(=O)(C(=O)CO_[{M}])[{M}].[{M}H]	1.39712	103.662
1of rule CHformation2					C(=O)(C(=O)CO_[{M}])[{M}].[{M}].[{M}]>>C(=O)([{M}])[{M}].C(=O)(CO_[{M}])[{M}]	-130.403	67.2892
1of rule COScission2					C(=O)([{M}])[{M}]>>O=[C:].[{M}].[{M}]	112.836	0
2 pathways from C(CO)(CO)O containing					the above pathway is of length 8 and contains
1of rule OHadsorption2					rule OHadsorption2 occurs 1 times
1of rule OHdesorption2					rule CHscission occurs 1 times
1of rule OHscission4					rule CHscission4 occurs 1 times
1of rule CHformation					rule CCscission occurs 1 times
1of rule OHformation2					rule OHscission occurs 1 times
1of rule COScission2					rule OHscission2 occurs 1 times
					rule CdoubleOFormation occurs 1 times
6 pathways from C(CO)(CO)O containing					rule CarbonMonoxideFormation occurs 1 times
1of rule OHadsorption2					Max Ea is			103.662
1of rule OHdesorption2
1of rule CHscission2					C(CO)(CO)O.[{M}].[{M}]>>C(O_[{M}])(CO)CO_[{M}]	-52.1177	0
1of rule OHscission					C(O_[{M}])(CO)CO_[{M}].[{M}].[{M}]>>C(C(O_[{M}])CO_[{M}])([{M}])O.[{M}H]	-98.5564	1.70947
1of rule CHformation					C(C(O_[{M}])CO_[{M}])([{M}])O.[{M}].[{M}]>>C(C([{M}])O)(CO_[{M}])O[{M}].[{M}].[{M}H]	2.4123	56.0866
1of rule CHformation2					C(C([{M}])O)(CO_[{M}])O[{M}].[{M}].[{M}]>>C(C(O[{M}])CO_[{M}])(O[{M}])[{M}].[{M}H]	-12.7724	43.0277
1of rule COScission					C(C(O[{M}])CO_[{M}])(O[{M}])[{M}].[{M}].[{M}]>>C(=O)(C(CO_[{M}])O[{M}])[{M}].[{M}].[{M}].[{M}H]	-40.2344	61.1979
					C(=O)(C(CO_[{M}])O[{M}])[{M}]>>C(=O)(C(=O)CO_[{M}])[{M}].[{M}H]	1.39712	103.662
3 pathways from C(CO)(CO)O containing					C(=O)(C(=O)CO_[{M}])[{M}].[{M}].[{M}]>>C(=O)([{M}])[{M}].C(=O)(CO_[{M}])[{M}]	-130.403	67.2892
1of rule OHadsorption2					C(=O)([{M}])[{M}]>>O=[C:].[{M}].[{M}]	112.836	0
1of rule OHdesorption2
1of rule OHscission2					the above pathway is of length 8 and contains
1of rule OHscission4					rule OHadsorption2 occurs 1 times
1of rule CHformation					rule CHscission occurs 1 times
1of rule OHformation2					rule CHscission4 occurs 1 times
1of rule COScission					rule CCscission occurs 1 times
					rule OHscission occurs 1 times
1 pathways from C(CO)(CO)O containing					rule OHscission2 occurs 1 times
1of rule OHadsorption2					rule CdoubleOFormation occurs 1 times
1of rule OHdesorption2					rule CarbonMonoxideFormation occurs 1 times
1of rule CHformation					Max Ea is			103.662
1of rule COScission
					C(CO)(CO)O.[{M}].[{M}]>>C(O_[{M}])(CO)CO_[{M}]	-52.1177	0
1 pathways from C(CO)(CO)O containing					C(O_[{M}])(CO)CO_[{M}].[{M}].[{M}]>>C(O[{M}])(CO_[{M}])CO_[{M}].[{M}H]	-28.2992	29.6747
1of rule OHadsorption2					C(O[{M}])(CO_[{M}])CO_[{M}].[{M}].[{M}]>>C(C([{M}])O)(CO_[{M}])O[{M}].[{M}].[{M}H]	-67.8449	33.0352
1of rule OHdesorption2					C(C([{M}])O)(CO_[{M}])O[{M}].[{M}].[{M}]>>C(C(O[{M}])CO_[{M}])(O[{M}])[{M}].[{M}H]	-12.7724	43.0277
1of rule OHscission					C(C(O[{M}])CO_[{M}])(O[{M}])[{M}].[{M}].[{M}]>>C(=O)(C(CO_[{M}])O[{M}])[{M}].[{M}].[{M}].[{M}H]	-40.2344	61.1979
1of rule CHformation					C(=O)(C(CO_[{M}])O[{M}])[{M}]>>C(=O)(C(=O)CO_[{M}])[{M}].[{M}H]	1.39712	103.662
1of rule COScission					C(=O)(C(=O)CO_[{M}])[{M}].[{M}].[{M}]>>C(=O)([{M}])[{M}].C(=O)(CO_[{M}])[{M}]	-130.403	67.2892
					C(=O)([{M}])[{M}]>>O=[C:].[{M}].[{M}]	112.836	0
1 pathways from C(CO)(CO)O containing
1of rule OHadsorption2					the above pathway is of length 8 and contains
1of rule OHdesorption2					rule OHadsorption2 occurs 1 times
1of rule CHscission					rule CHscission2 occurs 1 times
2of rule CHformation					rule CHscission4 occurs 1 times
1of rule COScission					rule CCscission occurs 1 times
					rule OHscission occurs 1 times
2 pathways from C(CO)(CO)O containing					rule OHscission4 occurs 1 times
1of rule OHadsorption2					rule CdoubleOFormation occurs 1 times
1of rule OHdesorption2					rule CarbonMonoxideFormation occurs 1 times
1of rule CHscission					Max Ea is			103.662
1of rule CHformation
1of rule CHformation2					C(CO)(CO)O.[{M}].[{M}]>>C(O_[{M}])(CO)CO_[{M}]	-52.1177	0
1of rule COScission2					C(O_[{M}])(CO)CO_[{M}].[{M}].[{M}]>>C(O_[{M}])(CO[{M}])CO_[{M}].[{M}H]	-34.1859	24.6121
					C(O_[{M}])(CO[{M}])CO_[{M}].[{M}].[{M}]>>C(O[{M}])(CO[{M}])CO_[{M}].[{M}].[{M}H]	2.4123	56.0866
3 pathways from C(CO)(CO)O containing					C(O[{M}])(CO[{M}])CO_[{M}].[{M}].[{M}]>>C(C(O[{M}])CO_[{M}])(O[{M}])[{M}].[{M}H]	-77.143	23.5512
1of rule OHadsorption2					C(C(O[{M}])CO_[{M}])(O[{M}])[{M}].[{M}].[{M}]>>C(=O)(C(CO_[{M}])O[{M}])[{M}].[{M}].[{M}].[{M}H]	-40.2344	61.1979
1of rule OHdesorption2					C(=O)(C(CO_[{M}])O[{M}])[{M}]>>C(=O)(C(=O)CO_[{M}])[{M}].[{M}H]	1.39712	103.662
1of rule CHscission					C(=O)(C(=O)CO_[{M}])[{M}].[{M}].[{M}]>>C(=O)([{M}])[{M}].C(=O)(CO_[{M}])[{M}]	-130.403	67.2892
1of rule OHscission2					C(=O)([{M}])[{M}]>>O=[C:].[{M}].[{M}]	112.836	0
1of rule CHformation
1of rule CHformation2					the above pathway is of length 8 and contains
1of rule COScission					rule OHadsorption2 occurs 1 times
					rule CHscission occurs 1 times
2 pathways from C(CO)(CO)O containing					rule CHscission4 occurs 1 times
1of rule OHadsorption2					rule CCscission occurs 1 times
1of rule OHdesorption2					rule OHscission occurs 1 times
1of rule CHscission2					rule OHscission2 occurs 1 times
1of rule CHformation					rule CdoubleOFormation occurs 1 times
1of rule CHformation2					rule CarbonMonoxideFormation occurs 1 times
1of rule COScission					Max Ea is			103.662
3 pathways from C(CO)(CO)O containing					C(CO)(CO)O.[{M}].[{M}]>>C(O_[{M}])(CO)CO_[{M}]	-52.1177	0
1of rule OHadsorption2					C(O_[{M}])(CO)CO_[{M}].[{M}].[{M}]>>C(O[{M}])(CO_[{M}])CO_[{M}].[{M}H]	-28.2992	29.6747
1of rule OHdesorption2					C(O[{M}])(CO_[{M}])CO_[{M}].[{M}].[{M}]>>C(O[{M}])(CO[{M}])CO_[{M}].[{M}].[{M}H]	-3.47436	51.0241
1of rule CHscission					C(O[{M}])(CO[{M}])CO_[{M}].[{M}].[{M}]>>C(C(O[{M}])CO_[{M}])(O[{M}])[{M}].[{M}H]	-77.143	23.5512
1of rule OHscission					C(C(O[{M}])CO_[{M}])(O[{M}])[{M}].[{M}].[{M}]>>C(=O)(C(CO_[{M}])O[{M}])[{M}].[{M}].[{M}].[{M}H]	-40.2344	61.1979
2of rule CHformation					C(=O)(C(CO_[{M}])O[{M}])[{M}]>>C(=O)(C(=O)CO_[{M}])[{M}].[{M}H]	1.39712	103.662
1of rule COScission					C(=O)(C(=O)CO_[{M}])[{M}].[{M}].[{M}]>>C(=O)([{M}])[{M}].C(=O)(CO_[{M}])[{M}]	-130.403	67.2892
					C(=O)([{M}])[{M}]>>O=[C:].[{M}].[{M}]	112.836	0
6 pathways from C(CO)(CO)O containing
1of rule OHadsorption2					the above pathway is of length 8 and contains
1of rule OHdesorption2					rule OHadsorption2 occurs 1 times
1of rule OHscission					rule CHscission occurs 1 times
1of rule OHscission2					rule CHscission4 occurs 1 times
1of rule CHformation					rule CCscission occurs 1 times
1of rule OHformation2					rule OHscission2 occurs 1 times
1of rule COScission					rule OHscission4 occurs 1 times
					rule CdoubleOFormation occurs 1 times
3 pathways from C(CO)(CO)O containing					rule CarbonMonoxideFormation occurs 1 times
1of rule OHadsorption2					Max Ea is			103.662
1of rule OHdesorption2
1of rule CHscission7					C(CO)(CO)O.[{M}].[{M}]>>C(O_[{M}])(CO)CO_[{M}]	-52.1177	0
1of rule OHscission2					C(O_[{M}])(CO)CO_[{M}].[{M}].[{M}]>>C(C(O_[{M}])CO_[{M}])([{M}])O.[{M}H]	-98.5564	1.70947
1of rule CHformation					C(C(O_[{M}])CO_[{M}])([{M}])O.[{M}].[{M}]>>C(C(O_[{M}])CO_[{M}])(O[{M}])[{M}].[{M}H]	-12.7724	43.0277
1of rule CHformation2					C(C(O_[{M}])CO_[{M}])(O[{M}])[{M}].[{M}].[{M}]>>C(C(O[{M}])CO_[{M}])(O[{M}])[{M}].[{M}].[{M}H]	2.4123	56.0866
1of rule COScission					C(C(O[{M}])CO_[{M}])(O[{M}])[{M}]>>C(=O)(C(CO_[{M}])O[{M}])[{M}].[{M}H]	-40.2344	61.1979
					C(=O)(C(CO_[{M}])O[{M}])[{M}]>>C(=O)(C(=O)CO_[{M}])[{M}].[{M}H]	1.39712	103.662
2 pathways from C(CO)(CO)O containing					C(=O)(C(=O)CO_[{M}])[{M}].[{M}].[{M}]>>C(=O)([{M}])[{M}].C(=O)(CO_[{M}])[{M}]	-130.403	67.2892
1of rule OHadsorption2					C(=O)([{M}])[{M}]>>O=[C:].[{M}].[{M}]	112.836	0
1of rule OHdesorption2
1of rule OHscission					the above pathway is of length 8 and contains
1of rule CHformation					rule OHadsorption2 occurs 1 times
1of rule OHformation2					rule CHscission occurs 1 times
1of rule COScission2					rule CCscission occurs 1 times
					rule OHscission occurs 1 times
					rule OHscission2 occurs 1 times
Number of pathways of length 4 is: 1					rule CdoubleOFormation occurs 2 times
Number of pathways of length 5 is: 1					rule CarbonMonoxideFormation occurs 1 times
Number of pathways of length 6 is: 13					Max Ea is			103.662
Number of pathways of length 7 is: 24
1 molecules satisfied the molecular constraints specified					C(CO)(CO)O.[{M}].[{M}]>>C(O_[{M}])(CO)CO_[{M}]	-52.1177	0
					C(O_[{M}])(CO)CO_[{M}].[{M}].[{M}]>>C(O_[{M}])(CO[{M}])CO_[{M}].[{M}H]	-34.1859	24.6121
					C(O_[{M}])(CO[{M}])CO_[{M}].[{M}].[{M}]>>C(C(O_[{M}])CO_[{M}])(O[{M}])[{M}].[{M}H]	-77.143	23.5512
					C(C(O_[{M}])CO_[{M}])(O[{M}])[{M}].[{M}].[{M}]>>C(C(O[{M}])CO_[{M}])(O[{M}])[{M}].[{M}].[{M}H]	2.4123	56.0866
					C(C(O[{M}])CO_[{M}])(O[{M}])[{M}]>>C(=O)(C(CO_[{M}])O[{M}])[{M}].[{M}H]	-40.2344	61.1979
					C(=O)(C(CO_[{M}])O[{M}])[{M}]>>C(=O)(C(=O)CO_[{M}])[{M}].[{M}H]	1.39712	103.662
					C(=O)(C(=O)CO_[{M}])[{M}].[{M}].[{M}]>>C(=O)([{M}])[{M}].C(=O)(CO_[{M}])[{M}]	-130.403	67.2892
					C(=O)([{M}])[{M}]>>O=[C:].[{M}].[{M}]	112.836	0
					the above pathway is of length 8 and contains
					rule OHadsorption2 occurs 1 times
					rule CHscission occurs 1 times
					rule CCscission occurs 1 times
					rule OHscission occurs 1 times
					rule OHscission2 occurs 1 times
					rule CdoubleOFormation occurs 2 times
					rule CarbonMonoxideFormation occurs 1 times
					Max Ea is			103.662
					C(CO)(CO)O.[{M}].[{M}]>>C(O_[{M}])(CO)CO_[{M}]	-52.1177	0
					C(O_[{M}])(CO)CO_[{M}].[{M}].[{M}]>>C(C(O_[{M}])CO_[{M}])([{M}])O.[{M}H]	-98.5564	1.70947
					C(C(O_[{M}])CO_[{M}])([{M}])O.[{M}].[{M}]>>C(C([{M}])O)(CO_[{M}])O[{M}].[{M}].[{M}H]	2.4123	56.0866
					C(C([{M}])O)(CO_[{M}])O[{M}].[{M}].[{M}]>>C(C(O[{M}])CO_[{M}])(O[{M}])[{M}].[{M}H]	-12.7724	43.0277
					C(C(O[{M}])CO_[{M}])(O[{M}])[{M}]>>C(=O)(C(CO_[{M}])O[{M}])[{M}].[{M}H]	-40.2344	61.1979
					C(=O)(C(CO_[{M}])O[{M}])[{M}]>>C(=O)(C(=O)CO_[{M}])[{M}].[{M}H]	1.39712	103.662
					C(=O)(C(=O)CO_[{M}])[{M}].[{M}].[{M}]>>C(=O)([{M}])[{M}].C(=O)(CO_[{M}])[{M}]	-130.403	67.2892
					C(=O)([{M}])[{M}]>>O=[C:].[{M}].[{M}]	112.836	0
					the above pathway is of length 8 and contains
					rule OHadsorption2 occurs 1 times
					rule CHscission occurs 1 times
					rule CCscission occurs 1 times
					rule OHscission occurs 1 times
					rule OHscission2 occurs 1 times
					rule CdoubleOFormation occurs 2 times
					rule CarbonMonoxideFormation occurs 1 times
					Max Ea is			103.662
					C(CO)(CO)O.[{M}].[{M}]>>C(O_[{M}])(CO)CO_[{M}]	-52.1177	0
					C(O_[{M}])(CO)CO_[{M}].[{M}].[{M}]>>C(O[{M}])(CO_[{M}])CO_[{M}].[{M}H]	-28.2992	29.6747
					C(O[{M}])(CO_[{M}])CO_[{M}].[{M}].[{M}]>>C(C([{M}])O)(CO_[{M}])O[{M}].[{M}].[{M}H]	-67.8449	33.0352
					C(C([{M}])O)(CO_[{M}])O[{M}].[{M}].[{M}]>>C(C(O[{M}])CO_[{M}])(O[{M}])[{M}].[{M}H]	-12.7724	43.0277
					C(C(O[{M}])CO_[{M}])(O[{M}])[{M}]>>C(=O)(C(CO_[{M}])O[{M}])[{M}].[{M}H]	-40.2344	61.1979
					C(=O)(C(CO_[{M}])O[{M}])[{M}]>>C(=O)(C(=O)CO_[{M}])[{M}].[{M}H]	1.39712	103.662
					C(=O)(C(=O)CO_[{M}])[{M}].[{M}].[{M}]>>C(=O)([{M}])[{M}].C(=O)(CO_[{M}])[{M}]	-130.403	67.2892
					C(=O)([{M}])[{M}]>>O=[C:].[{M}].[{M}]	112.836	0
					the above pathway is of length 8 and contains
					rule OHadsorption2 occurs 1 times
					rule CHscission2 occurs 1 times
					rule CCscission occurs 1 times
					rule OHscission occurs 1 times
					rule OHscission4 occurs 1 times
					rule CdoubleOFormation occurs 2 times
					rule CarbonMonoxideFormation occurs 1 times
					Max Ea is			103.662
					C(CO)(CO)O.[{M}].[{M}]>>C(O_[{M}])(CO)CO_[{M}]	-52.1177	0
					C(O_[{M}])(CO)CO_[{M}].[{M}].[{M}]>>C(O_[{M}])(CO[{M}])CO_[{M}].[{M}H]	-34.1859	24.6121
					C(O_[{M}])(CO[{M}])CO_[{M}].[{M}].[{M}]>>C(O[{M}])(CO[{M}])CO_[{M}].[{M}].[{M}H]	2.4123	56.0866
					C(O[{M}])(CO[{M}])CO_[{M}].[{M}].[{M}]>>C(C(O[{M}])CO_[{M}])(O[{M}])[{M}].[{M}H]	-77.143	23.5512
					C(C(O[{M}])CO_[{M}])(O[{M}])[{M}]>>C(=O)(C(CO_[{M}])O[{M}])[{M}].[{M}H]	-40.2344	61.1979
					C(=O)(C(CO_[{M}])O[{M}])[{M}]>>C(=O)(C(=O)CO_[{M}])[{M}].[{M}H]	1.39712	103.662
					C(=O)(C(=O)CO_[{M}])[{M}].[{M}].[{M}]>>C(=O)([{M}])[{M}].C(=O)(CO_[{M}])[{M}]	-130.403	67.2892
					C(=O)([{M}])[{M}]>>O=[C:].[{M}].[{M}]	112.836	0
					the above pathway is of length 8 and contains
					rule OHadsorption2 occurs 1 times
					rule CHscission occurs 1 times
					rule CCscission occurs 1 times
					rule OHscission occurs 1 times
					rule OHscission2 occurs 1 times
					rule CdoubleOFormation occurs 2 times
					rule CarbonMonoxideFormation occurs 1 times
					Max Ea is			103.662
					C(CO)(CO)O.[{M}].[{M}]>>C(O_[{M}])(CO)CO_[{M}]	-52.1177	0
					C(O_[{M}])(CO)CO_[{M}].[{M}].[{M}]>>C(O[{M}])(CO_[{M}])CO_[{M}].[{M}H]	-28.2992	29.6747
					C(O[{M}])(CO_[{M}])CO_[{M}].[{M}].[{M}]>>C(O[{M}])(CO[{M}])CO_[{M}].[{M}].[{M}H]	-3.47436	51.0241
					C(O[{M}])(CO[{M}])CO_[{M}].[{M}].[{M}]>>C(C(O[{M}])CO_[{M}])(O[{M}])[{M}].[{M}H]	-77.143	23.5512
					C(C(O[{M}])CO_[{M}])(O[{M}])[{M}]>>C(=O)(C(CO_[{M}])O[{M}])[{M}].[{M}H]	-40.2344	61.1979
					C(=O)(C(CO_[{M}])O[{M}])[{M}]>>C(=O)(C(=O)CO_[{M}])[{M}].[{M}H]	1.39712	103.662
					C(=O)(C(=O)CO_[{M}])[{M}].[{M}].[{M}]>>C(=O)([{M}])[{M}].C(=O)(CO_[{M}])[{M}]	-130.403	67.2892
					C(=O)([{M}])[{M}]>>O=[C:].[{M}].[{M}]	112.836	0
					the above pathway is of length 8 and contains
					rule OHadsorption2 occurs 1 times
					rule CHscission occurs 1 times
					rule CCscission occurs 1 times
					rule OHscission2 occurs 1 times
					rule OHscission4 occurs 1 times
					rule CdoubleOFormation occurs 2 times
					rule CarbonMonoxideFormation occurs 1 times
					Max Ea is			103.662
					C(CO)(CO)O.[{M}].[{M}]>>C(O_[{M}])(CO)CO_[{M}]	-52.1177	0
					C(O_[{M}])(CO)CO_[{M}].[{M}].[{M}]>>C(C(O_[{M}])CO_[{M}])([{M}])O.[{M}H]	-98.5564	1.70947
					C(C(O_[{M}])CO_[{M}])([{M}])O.[{M}].[{M}]>>C(C([{M}])O)(CO_[{M}])([{M}])O.[{M}].[{M}H]	-18.3939	83.4753
					C(C([{M}])O)(CO_[{M}])([{M}])O>>C(C=O)(CO_[{M}])([{M}])O.[{M}H]	-23.3188	33.9579
					C(C=O)(CO_[{M}])([{M}])O.[{M}].[{M}]>>C(C=O)(CO_[{M}])(O[{M}])[{M}].[{M}H]	-12.7724	43.0277
					C(C=O)(CO_[{M}])(O[{M}])[{M}].[{M}].[{M}]>>C(=O)(C(=O)CO_[{M}])[{M}].[{M}].[{M}].[{M}H]	5.28761	107.63
					C(=O)(C(=O)CO_[{M}])[{M}].[{M}].[{M}]>>C(=O)([{M}])[{M}].C(=O)(CO_[{M}])[{M}]	-130.403	67.2892
					C(=O)([{M}])[{M}]>>O=[C:].[{M}].[{M}]	112.836	0
					the above pathway is of length 8 and contains
					rule OHadsorption2 occurs 1 times
					rule CHscission occurs 1 times
					rule CHscission2 occurs 1 times
					rule CHscission3 occurs 1 times
					rule CCscission occurs 1 times
					rule OHscission occurs 1 times
					rule CdoubleOFromCOH occurs 1 times
					rule CarbonMonoxideFormation occurs 1 times
					Max Ea is			107.63
					C(CO)(CO)O.[{M}].[{M}]>>C(O_[{M}])(CO)CO_[{M}]	-52.1177	0
					C(O_[{M}])(CO)CO_[{M}].[{M}].[{M}]>>C(CO_[{M}])(CO_[{M}])([{M}])O.[{M}H]	-70.5188	30.3078
					C(CO_[{M}])(CO_[{M}])([{M}])O.[{M}].[{M}]>>C(C([{M}])O)(CO_[{M}])([{M}])O.[{M}].[{M}H]	-46.4315	54.8769
					C(C([{M}])O)(CO_[{M}])([{M}])O>>C(C=O)(CO_[{M}])([{M}])O.[{M}H]	-23.3188	33.9579
					C(C=O)(CO_[{M}])([{M}])O.[{M}].[{M}]>>C(C=O)(CO_[{M}])(O[{M}])[{M}].[{M}H]	-12.7724	43.0277
					C(C=O)(CO_[{M}])(O[{M}])[{M}].[{M}].[{M}]>>C(=O)(C(=O)CO_[{M}])[{M}].[{M}].[{M}].[{M}H]	5.28761	107.63
					C(=O)(C(=O)CO_[{M}])[{M}].[{M}].[{M}]>>C(=O)([{M}])[{M}].C(=O)(CO_[{M}])[{M}]	-130.403	67.2892
					C(=O)([{M}])[{M}]>>O=[C:].[{M}].[{M}]	112.836	0
					the above pathway is of length 8 and contains
					rule OHadsorption2 occurs 1 times
					rule CHscission2 occurs 1 times
					rule CHscission3 occurs 1 times
					rule CHscission7 occurs 1 times
					rule CCscission occurs 1 times
					rule OHscission occurs 1 times
					rule CdoubleOFromCOH occurs 1 times
					rule CarbonMonoxideFormation occurs 1 times
					Max Ea is			107.63
					C(CO)(CO)O.[{M}].[{M}]>>C(O_[{M}])(CO)CO_[{M}]	-52.1177	0
					C(O_[{M}])(CO)CO_[{M}].[{M}].[{M}]>>C(C(O_[{M}])CO_[{M}])([{M}])O.[{M}H]	-98.5564	1.70947
					C(C(O_[{M}])CO_[{M}])([{M}])O.[{M}].[{M}]>>C(C(O_[{M}])CO_[{M}])(O[{M}])[{M}].[{M}H]	-12.7724	43.0277
					C(C(O_[{M}])CO_[{M}])(O[{M}])[{M}].[{M}].[{M}]>>C(C=O)(CO_[{M}])([{M}])O.[{M}].[{M}].[{M}].[{M}H]	-28.9402	72.718
					C(C=O)(CO_[{M}])([{M}])O.[{M}].[{M}]>>C(C=O)(CO_[{M}])(O[{M}])[{M}].[{M}H]	-12.7724	43.0277
					C(C=O)(CO_[{M}])(O[{M}])[{M}].[{M}].[{M}]>>C(=O)(C(=O)CO_[{M}])[{M}].[{M}].[{M}].[{M}H]	5.28761	107.63
					C(=O)(C(=O)CO_[{M}])[{M}].[{M}].[{M}]>>C(=O)([{M}])[{M}].C(=O)(CO_[{M}])[{M}]	-130.403	67.2892
					C(=O)([{M}])[{M}]>>O=[C:].[{M}].[{M}]	112.836	0
					the above pathway is of length 8 and contains
					rule OHadsorption2 occurs 1 times
					rule CHscission occurs 1 times
					rule CHscission3 occurs 1 times
					rule CHscission5 occurs 1 times
					rule CCscission occurs 1 times
					rule OHscission occurs 2 times
					rule CarbonMonoxideFormation occurs 1 times
					Max Ea is			107.63
					C(CO)(CO)O.[{M}].[{M}]>>C(O_[{M}])(CO)CO_[{M}]	-52.1177	0
					C(O_[{M}])(CO)CO_[{M}].[{M}].[{M}]>>C(O_[{M}])(CO[{M}])CO_[{M}].[{M}H]	-34.1859	24.6121
					C(O_[{M}])(CO[{M}])CO_[{M}].[{M}].[{M}]>>C(C(O_[{M}])CO_[{M}])(O[{M}])[{M}].[{M}H]	-77.143	23.5512
					C(C(O_[{M}])CO_[{M}])(O[{M}])[{M}].[{M}].[{M}]>>C(C=O)(CO_[{M}])([{M}])O.[{M}].[{M}].[{M}].[{M}H]	-28.9402	72.718
					C(C=O)(CO_[{M}])([{M}])O.[{M}].[{M}]>>C(C=O)(CO_[{M}])(O[{M}])[{M}].[{M}H]	-12.7724	43.0277
					C(C=O)(CO_[{M}])(O[{M}])[{M}].[{M}].[{M}]>>C(=O)(C(=O)CO_[{M}])[{M}].[{M}].[{M}].[{M}H]	5.28761	107.63
					C(=O)(C(=O)CO_[{M}])[{M}].[{M}].[{M}]>>C(=O)([{M}])[{M}].C(=O)(CO_[{M}])[{M}]	-130.403	67.2892
					C(=O)([{M}])[{M}]>>O=[C:].[{M}].[{M}]	112.836	0
					the above pathway is of length 8 and contains
					rule OHadsorption2 occurs 1 times
					rule CHscission occurs 1 times
					rule CHscission3 occurs 1 times
					rule CHscission5 occurs 1 times
					rule CCscission occurs 1 times
					rule OHscission occurs 2 times
					rule CarbonMonoxideFormation occurs 1 times
					Max Ea is			107.63
					C(CO)(CO)O.[{M}].[{M}]>>C(O_[{M}])(CO)CO_[{M}]	-52.1177	0
					C(O_[{M}])(CO)CO_[{M}].[{M}].[{M}]>>C(CO_[{M}])(CO_[{M}])([{M}])O.[{M}H]	-70.5188	30.3078
					C(CO_[{M}])(CO_[{M}])([{M}])O.[{M}].[{M}]>>C(CO[{M}])(CO_[{M}])([{M}])O.[{M}].[{M}H]	-3.47436	51.0241
					C(CO[{M}])(CO_[{M}])([{M}])O>>C(C=O)(CO_[{M}])([{M}])O.[{M}H]	-66.2759	34.6356
					C(C=O)(CO_[{M}])([{M}])O.[{M}].[{M}]>>C(C=O)(CO_[{M}])(O[{M}])[{M}].[{M}H]	-12.7724	43.0277
					C(C=O)(CO_[{M}])(O[{M}])[{M}].[{M}].[{M}]>>C(=O)(C(=O)CO_[{M}])[{M}].[{M}].[{M}].[{M}H]	5.28761	107.63
					C(=O)(C(=O)CO_[{M}])[{M}].[{M}].[{M}]>>C(=O)([{M}])[{M}].C(=O)(CO_[{M}])[{M}]	-130.403	67.2892
					C(=O)([{M}])[{M}]>>O=[C:].[{M}].[{M}]	112.836	0
					the above pathway is of length 8 and contains
					rule OHadsorption2 occurs 1 times
					rule CHscission3 occurs 1 times
					rule CHscission7 occurs 1 times
					rule CCscission occurs 1 times
					rule OHscission occurs 1 times
					rule OHscission2 occurs 1 times
					rule CdoubleOFormation occurs 1 times
					rule CarbonMonoxideFormation occurs 1 times
					Max Ea is			107.63
					C(CO)(CO)O.[{M}].[{M}]>>C(O_[{M}])(CO)CO_[{M}]	-52.1177	0
					C(O_[{M}])(CO)CO_[{M}].[{M}].[{M}]>>C(O_[{M}])(CO[{M}])CO_[{M}].[{M}H]	-34.1859	24.6121
					C(O_[{M}])(CO[{M}])CO_[{M}].[{M}].[{M}]>>C(CO[{M}])(CO_[{M}])([{M}])O.[{M}].[{M}H]	-39.8073	61.6336
					C(CO[{M}])(CO_[{M}])([{M}])O>>C(C=O)(CO_[{M}])([{M}])O.[{M}H]	-66.2759	34.6356
					C(C=O)(CO_[{M}])([{M}])O.[{M}].[{M}]>>C(C=O)(CO_[{M}])(O[{M}])[{M}].[{M}H]	-12.7724	43.0277
					C(C=O)(CO_[{M}])(O[{M}])[{M}].[{M}].[{M}]>>C(=O)(C(=O)CO_[{M}])[{M}].[{M}].[{M}].[{M}H]	5.28761	107.63
					C(=O)(C(=O)CO_[{M}])[{M}].[{M}].[{M}]>>C(=O)([{M}])[{M}].C(=O)(CO_[{M}])[{M}]	-130.403	67.2892
					C(=O)([{M}])[{M}]>>O=[C:].[{M}].[{M}]	112.836	0
					the above pathway is of length 8 and contains
					rule OHadsorption2 occurs 1 times
					rule CHscission2 occurs 1 times
					rule CHscission3 occurs 1 times
					rule CCscission occurs 1 times
					rule OHscission occurs 2 times
					rule CdoubleOFormation occurs 1 times
					rule CarbonMonoxideFormation occurs 1 times
					Max Ea is			107.63
					C(CO)(CO)O.[{M}].[{M}]>>C(O_[{M}])(CO)CO_[{M}]	-52.1177	0
					C(O_[{M}])(CO)CO_[{M}].[{M}].[{M}]>>C(C(O_[{M}])CO_[{M}])([{M}])O.[{M}H]	-98.5564	1.70947
					C(C(O_[{M}])CO_[{M}])([{M}])O.[{M}].[{M}]>>C(C(O_[{M}])CO_[{M}])(O[{M}])[{M}].[{M}H]	-12.7724	43.0277
					C(C(O_[{M}])CO_[{M}])(O[{M}])[{M}].[{M}].[{M}]>>C(C(O[{M}])CO_[{M}])(O[{M}])[{M}].[{M}].[{M}H]	2.4123	56.0866
					C(C(O[{M}])CO_[{M}])(O[{M}])[{M}].[{M}].[{M}]>>C(C=O)(CO_[{M}])(O[{M}])[{M}].[{M}].[{M}].[{M}H]	-44.1249	57.2296
					C(C=O)(CO_[{M}])(O[{M}])[{M}].[{M}].[{M}]>>C(=O)(C(=O)CO_[{M}])[{M}].[{M}].[{M}].[{M}H]	5.28761	107.63
					C(=O)(C(=O)CO_[{M}])[{M}].[{M}].[{M}]>>C(=O)([{M}])[{M}].C(=O)(CO_[{M}])[{M}]	-130.403	67.2892
					C(=O)([{M}])[{M}]>>O=[C:].[{M}].[{M}]	112.836	0
					the above pathway is of length 8 and contains
					rule OHadsorption2 occurs 1 times
					rule CHscission occurs 1 times
					rule CHscission3 occurs 2 times
					rule CCscission occurs 1 times
					rule OHscission occurs 1 times
					rule OHscission2 occurs 1 times
					rule CarbonMonoxideFormation occurs 1 times
					Max Ea is			107.63
					C(CO)(CO)O.[{M}].[{M}]>>C(O_[{M}])(CO)CO_[{M}]	-52.1177	0
					C(O_[{M}])(CO)CO_[{M}].[{M}].[{M}]>>C(O_[{M}])(CO[{M}])CO_[{M}].[{M}H]	-34.1859	24.6121
					C(O_[{M}])(CO[{M}])CO_[{M}].[{M}].[{M}]>>C(C(O_[{M}])CO_[{M}])(O[{M}])[{M}].[{M}H]	-77.143	23.5512
					C(C(O_[{M}])CO_[{M}])(O[{M}])[{M}].[{M}].[{M}]>>C(C(O[{M}])CO_[{M}])(O[{M}])[{M}].[{M}].[{M}H]	2.4123	56.0866
					C(C(O[{M}])CO_[{M}])(O[{M}])[{M}].[{M}].[{M}]>>C(C=O)(CO_[{M}])(O[{M}])[{M}].[{M}].[{M}].[{M}H]	-44.1249	57.2296
					C(C=O)(CO_[{M}])(O[{M}])[{M}].[{M}].[{M}]>>C(=O)(C(=O)CO_[{M}])[{M}].[{M}].[{M}].[{M}H]	5.28761	107.63
					C(=O)(C(=O)CO_[{M}])[{M}].[{M}].[{M}]>>C(=O)([{M}])[{M}].C(=O)(CO_[{M}])[{M}]	-130.403	67.2892
					C(=O)([{M}])[{M}]>>O=[C:].[{M}].[{M}]	112.836	0
					the above pathway is of length 8 and contains
					rule OHadsorption2 occurs 1 times
					rule CHscission occurs 1 times
					rule CHscission3 occurs 2 times
					rule CCscission occurs 1 times
					rule OHscission occurs 1 times
					rule OHscission2 occurs 1 times
					rule CarbonMonoxideFormation occurs 1 times
					Max Ea is			107.63
					C(CO)(CO)O.[{M}].[{M}]>>C(O_[{M}])(CO)CO_[{M}]	-52.1177	0
					C(O_[{M}])(CO)CO_[{M}].[{M}].[{M}]>>C(C(O_[{M}])CO_[{M}])([{M}])O.[{M}H]	-98.5564	1.70947
					C(C(O_[{M}])CO_[{M}])([{M}])O.[{M}].[{M}]>>C(C([{M}])O)(CO_[{M}])O[{M}].[{M}].[{M}H]	2.4123	56.0866
					C(C([{M}])O)(CO_[{M}])O[{M}].[{M}].[{M}]>>C(C(O[{M}])CO_[{M}])(O[{M}])[{M}].[{M}H]	-12.7724	43.0277
					C(C(O[{M}])CO_[{M}])(O[{M}])[{M}].[{M}].[{M}]>>C(C=O)(CO_[{M}])(O[{M}])[{M}].[{M}].[{M}].[{M}H]	-44.1249	57.2296
					C(C=O)(CO_[{M}])(O[{M}])[{M}].[{M}].[{M}]>>C(=O)(C(=O)CO_[{M}])[{M}].[{M}].[{M}].[{M}H]	5.28761	107.63
					C(=O)(C(=O)CO_[{M}])[{M}].[{M}].[{M}]>>C(=O)([{M}])[{M}].C(=O)(CO_[{M}])[{M}]	-130.403	67.2892
					C(=O)([{M}])[{M}]>>O=[C:].[{M}].[{M}]	112.836	0
					the above pathway is of length 8 and contains
					rule OHadsorption2 occurs 1 times
					rule CHscission occurs 1 times
					rule CHscission3 occurs 2 times
					rule CCscission occurs 1 times
					rule OHscission occurs 1 times
					rule OHscission2 occurs 1 times
					rule CarbonMonoxideFormation occurs 1 times
					Max Ea is			107.63
					C(CO)(CO)O.[{M}].[{M}]>>C(O_[{M}])(CO)CO_[{M}]	-52.1177	0		C(CO)(CO)O.[{M}].[{M}]>>C(O_[{M}])(CO)CO_[{M}]	-58.2153	0	0
					C(O_[{M}])(CO)CO_[{M}].[{M}].[{M}]>>C(O[{M}])(CO_[{M}])CO_[{M}].[{M}H]	-28.2992	29.6747		C(O_[{M}])(CO)CO_[{M}].[{M}].[{M}]>>C(O[{M}])(CO_[{M}])CO_[{M}].[{M}H]	-18.3906	38.1961	0
					C(O[{M}])(CO_[{M}])CO_[{M}].[{M}].[{M}]>>C(C([{M}])O)(CO_[{M}])O[{M}].[{M}].[{M}H]	-67.8449	33.0352		C(O[{M}])(CO_[{M}])CO_[{M}].[{M}].[{M}]>>C(O[{M}])(CO[{M}])CO_[{M}].[{M}].[{M}H]	9.48304	62.1674	1
					C(C([{M}])O)(CO_[{M}])O[{M}].[{M}].[{M}]>>C(C(O[{M}])CO_[{M}])(O[{M}])[{M}].[{M}H]	-12.7724	43.0277		C(O[{M}])(CO[{M}])CO_[{M}].[{M}].[{M}]>>C(C(O[{M}])CO_[{M}])(O[{M}])[{M}].[{M}H]	-49.1539	52.1001	1
					C(C(O[{M}])CO_[{M}])(O[{M}])[{M}].[{M}].[{M}]>>C(C=O)(CO_[{M}])(O[{M}])[{M}].[{M}].[{M}].[{M}H]	-44.1249	57.2296		C(C(O[{M}])CO_[{M}])(O[{M}])[{M}].[{M}].[{M}]>>C(C=O)(CO_[{M}])(O[{M}])[{M}].[{M}].[{M}].[{M}H]	-54.0335	47.1228	0
					C(C=O)(CO_[{M}])(O[{M}])[{M}].[{M}].[{M}]>>C(=O)(C(=O)CO_[{M}])[{M}].[{M}].[{M}].[{M}H]	5.28761	107.63		C(C=O)(CO_[{M}])(O[{M}])[{M}].[{M}].[{M}]>>C(=O)(C(=O)CO_[{M}])[{M}].[{M}].[{M}].[{M}H]	-41.3144	60.0963	0
					C(=O)(C(=O)CO_[{M}])[{M}].[{M}].[{M}]>>C(=O)([{M}])[{M}].C(=O)(CO_[{M}])[{M}]	-130.403	67.2892		C(=O)(C(=O)CO_[{M}])[{M}].[{M}].[{M}]>>C(=O)([{M}])[{M}].C(=O)(CO_[{M}])[{M}]	-128.705	68.4102	0
					C(=O)([{M}])[{M}]>>O=[C:].[{M}].[{M}]	112.836	0		C(=O)([{M}])[{M}]>>O=[C:].[{M}].[{M}]	111.137	0	0
					the above pathway is of length 8 and contains
					rule OHadsorption2 occurs 1 times
					rule CHscission2 occurs 1 times
					rule CHscission3 occurs 2 times
					rule CCscission occurs 1 times
					rule OHscission occurs 1 times
					rule OHscission4 occurs 1 times
					rule CarbonMonoxideFormation occurs 1 times
					Max Ea is			107.63
					C(CO)(CO)O.[{M}].[{M}]>>C(O_[{M}])(CO)CO_[{M}]	-52.1177	0
					C(O_[{M}])(CO)CO_[{M}].[{M}].[{M}]>>C(O_[{M}])(CO[{M}])CO_[{M}].[{M}H]	-34.1859	24.6121
					C(O_[{M}])(CO[{M}])CO_[{M}].[{M}].[{M}]>>C(O[{M}])(CO[{M}])CO_[{M}].[{M}].[{M}H]	2.4123	56.0866
					C(O[{M}])(CO[{M}])CO_[{M}].[{M}].[{M}]>>C(C(O[{M}])CO_[{M}])(O[{M}])[{M}].[{M}H]	-77.143	23.5512
					C(C(O[{M}])CO_[{M}])(O[{M}])[{M}].[{M}].[{M}]>>C(C=O)(CO_[{M}])(O[{M}])[{M}].[{M}].[{M}].[{M}H]	-44.1249	57.2296
					C(C=O)(CO_[{M}])(O[{M}])[{M}].[{M}].[{M}]>>C(=O)(C(=O)CO_[{M}])[{M}].[{M}].[{M}].[{M}H]	5.28761	107.63
					C(=O)(C(=O)CO_[{M}])[{M}].[{M}].[{M}]>>C(=O)([{M}])[{M}].C(=O)(CO_[{M}])[{M}]	-130.403	67.2892
					C(=O)([{M}])[{M}]>>O=[C:].[{M}].[{M}]	112.836	0
					the above pathway is of length 8 and contains
					rule OHadsorption2 occurs 1 times
					rule CHscission occurs 1 times
					rule CHscission3 occurs 2 times
					rule CCscission occurs 1 times
					rule OHscission occurs 1 times
					rule OHscission2 occurs 1 times
					rule CarbonMonoxideFormation occurs 1 times
					Max Ea is			107.63
					C(CO)(CO)O.[{M}].[{M}]>>C(O_[{M}])(CO)CO_[{M}]	-52.1177	0
					C(O_[{M}])(CO)CO_[{M}].[{M}].[{M}]>>C(O[{M}])(CO_[{M}])CO_[{M}].[{M}H]	-28.2992	29.6747
					C(O[{M}])(CO_[{M}])CO_[{M}].[{M}].[{M}]>>C(O[{M}])(CO[{M}])CO_[{M}].[{M}].[{M}H]	-3.47436	51.0241
					C(O[{M}])(CO[{M}])CO_[{M}].[{M}].[{M}]>>C(C(O[{M}])CO_[{M}])(O[{M}])[{M}].[{M}H]	-77.143	23.5512
					C(C(O[{M}])CO_[{M}])(O[{M}])[{M}].[{M}].[{M}]>>C(C=O)(CO_[{M}])(O[{M}])[{M}].[{M}].[{M}].[{M}H]	-44.1249	57.2296
					C(C=O)(CO_[{M}])(O[{M}])[{M}].[{M}].[{M}]>>C(=O)(C(=O)CO_[{M}])[{M}].[{M}].[{M}].[{M}H]	5.28761	107.63
					C(=O)(C(=O)CO_[{M}])[{M}].[{M}].[{M}]>>C(=O)([{M}])[{M}].C(=O)(CO_[{M}])[{M}]	-130.403	67.2892
					C(=O)([{M}])[{M}]>>O=[C:].[{M}].[{M}]	112.836	0
					the above pathway is of length 8 and contains
					rule OHadsorption2 occurs 1 times
					rule CHscission occurs 1 times
					rule CHscission3 occurs 2 times
					rule CCscission occurs 1 times
					rule OHscission2 occurs 1 times
					rule OHscission4 occurs 1 times
					rule CarbonMonoxideFormation occurs 1 times
					Max Ea is			107.63
					C(CO)(CO)O.[{M}].[{M}]>>C(O_[{M}])(CO)CO_[{M}]	-52.1177	0
					C(O_[{M}])(CO)CO_[{M}].[{M}].[{M}]>>C(CO_[{M}])(CO_[{M}])([{M}])O.[{M}H]	-70.5188	30.3078
					C(CO_[{M}])(CO_[{M}])([{M}])O.[{M}].[{M}]>>C(O[{M}])(CO_[{M}])(CO_[{M}])[{M}].[{M}H]	-12.7724	43.0277
					C(O[{M}])(CO_[{M}])(CO_[{M}])[{M}].[{M}].[{M}]>>C(O[{M}])(CO[{M}])(CO_[{M}])[{M}].[{M}].[{M}H]	-3.47436	51.0241
					C(O[{M}])(CO[{M}])(CO_[{M}])[{M}]>>C(C=O)(CO_[{M}])(O[{M}])[{M}].[{M}H]	-66.2759	34.6356
					C(C=O)(CO_[{M}])(O[{M}])[{M}].[{M}].[{M}]>>C(=O)(C(=O)CO_[{M}])[{M}].[{M}].[{M}].[{M}H]	5.28761	107.63
					C(=O)(C(=O)CO_[{M}])[{M}].[{M}].[{M}]>>C(=O)([{M}])[{M}].C(=O)(CO_[{M}])[{M}]	-130.403	67.2892
					C(=O)([{M}])[{M}]>>O=[C:].[{M}].[{M}]	112.836	0
					the above pathway is of length 8 and contains
					rule OHadsorption2 occurs 1 times
					rule CHscission3 occurs 1 times
					rule CHscission7 occurs 1 times
					rule CCscission occurs 1 times
					rule OHscission occurs 1 times
					rule OHscission2 occurs 1 times
					rule CdoubleOFormation occurs 1 times
					rule CarbonMonoxideFormation occurs 1 times
					Max Ea is			107.63
					C(CO)(CO)O.[{M}].[{M}]>>C(O_[{M}])(CO)CO_[{M}]	-52.1177	0
					C(O_[{M}])(CO)CO_[{M}].[{M}].[{M}]>>C(O[{M}])(CO_[{M}])CO_[{M}].[{M}H]	-28.2992	29.6747
					C(O[{M}])(CO_[{M}])CO_[{M}].[{M}].[{M}]>>C(O[{M}])(CO_[{M}])(CO_[{M}])[{M}].[{M}H]	-54.992	46.1451
					C(O[{M}])(CO_[{M}])(CO_[{M}])[{M}].[{M}].[{M}]>>C(O[{M}])(CO[{M}])(CO_[{M}])[{M}].[{M}].[{M}H]	-3.47436	51.0241
					C(O[{M}])(CO[{M}])(CO_[{M}])[{M}]>>C(C=O)(CO_[{M}])(O[{M}])[{M}].[{M}H]	-66.2759	34.6356
					C(C=O)(CO_[{M}])(O[{M}])[{M}].[{M}].[{M}]>>C(=O)(C(=O)CO_[{M}])[{M}].[{M}].[{M}].[{M}H]	5.28761	107.63
					C(=O)(C(=O)CO_[{M}])[{M}].[{M}].[{M}]>>C(=O)([{M}])[{M}].C(=O)(CO_[{M}])[{M}]	-130.403	67.2892
					C(=O)([{M}])[{M}]>>O=[C:].[{M}].[{M}]	112.836	0
					the above pathway is of length 8 and contains
					rule OHadsorption2 occurs 1 times
					rule CHscission occurs 1 times
					rule CHscission3 occurs 1 times
					rule CCscission occurs 1 times
					rule OHscission2 occurs 1 times
					rule OHscission4 occurs 1 times
					rule CdoubleOFormation occurs 1 times
					rule CarbonMonoxideFormation occurs 1 times
					Max Ea is			107.63
					C(CO)(CO)O.[{M}].[{M}]>>C(O_[{M}])(CO)CO_[{M}]	-52.1177	0
					C(O_[{M}])(CO)CO_[{M}].[{M}].[{M}]>>C(CO_[{M}])(CO_[{M}])([{M}])O.[{M}H]	-70.5188	30.3078
					C(CO_[{M}])(CO_[{M}])([{M}])O.[{M}].[{M}]>>C(CO[{M}])(CO_[{M}])([{M}])O.[{M}].[{M}H]	-3.47436	51.0241
					C(CO[{M}])(CO_[{M}])([{M}])O.[{M}].[{M}]>>C(O[{M}])(CO[{M}])(CO_[{M}])[{M}].[{M}H]	-12.7724	43.0277
					C(O[{M}])(CO[{M}])(CO_[{M}])[{M}]>>C(C=O)(CO_[{M}])(O[{M}])[{M}].[{M}H]	-66.2759	34.6356
					C(C=O)(CO_[{M}])(O[{M}])[{M}].[{M}].[{M}]>>C(=O)(C(=O)CO_[{M}])[{M}].[{M}].[{M}].[{M}H]	5.28761	107.63
					C(=O)(C(=O)CO_[{M}])[{M}].[{M}].[{M}]>>C(=O)([{M}])[{M}].C(=O)(CO_[{M}])[{M}]	-130.403	67.2892
					C(=O)([{M}])[{M}]>>O=[C:].[{M}].[{M}]	112.836	0
					the above pathway is of length 8 and contains
					rule OHadsorption2 occurs 1 times
					rule CHscission3 occurs 1 times
					rule CHscission7 occurs 1 times
					rule CCscission occurs 1 times
					rule OHscission occurs 1 times
					rule OHscission2 occurs 1 times
					rule CdoubleOFormation occurs 1 times
					rule CarbonMonoxideFormation occurs 1 times
					Max Ea is			107.63
					C(CO)(CO)O.[{M}].[{M}]>>C(O_[{M}])(CO)CO_[{M}]	-52.1177	0
					C(O_[{M}])(CO)CO_[{M}].[{M}].[{M}]>>C(O_[{M}])(CO[{M}])CO_[{M}].[{M}H]	-34.1859	24.6121
					C(O_[{M}])(CO[{M}])CO_[{M}].[{M}].[{M}]>>C(CO[{M}])(CO_[{M}])([{M}])O.[{M}].[{M}H]	-39.8073	61.6336
					C(CO[{M}])(CO_[{M}])([{M}])O.[{M}].[{M}]>>C(O[{M}])(CO[{M}])(CO_[{M}])[{M}].[{M}H]	-12.7724	43.0277
					C(O[{M}])(CO[{M}])(CO_[{M}])[{M}]>>C(C=O)(CO_[{M}])(O[{M}])[{M}].[{M}H]	-66.2759	34.6356
					C(C=O)(CO_[{M}])(O[{M}])[{M}].[{M}].[{M}]>>C(=O)(C(=O)CO_[{M}])[{M}].[{M}].[{M}].[{M}H]	5.28761	107.63
					C(=O)(C(=O)CO_[{M}])[{M}].[{M}].[{M}]>>C(=O)([{M}])[{M}].C(=O)(CO_[{M}])[{M}]	-130.403	67.2892
					C(=O)([{M}])[{M}]>>O=[C:].[{M}].[{M}]	112.836	0
					the above pathway is of length 8 and contains
					rule OHadsorption2 occurs 1 times
					rule CHscission2 occurs 1 times
					rule CHscission3 occurs 1 times
					rule CCscission occurs 1 times
					rule OHscission occurs 2 times
					rule CdoubleOFormation occurs 1 times
					rule CarbonMonoxideFormation occurs 1 times
					Max Ea is			107.63
					C(CO)(CO)O.[{M}].[{M}]>>C(O_[{M}])(CO)CO_[{M}]	-52.1177	0
					C(O_[{M}])(CO)CO_[{M}].[{M}].[{M}]>>C(O_[{M}])(CO[{M}])CO_[{M}].[{M}H]	-34.1859	24.6121
					C(O_[{M}])(CO[{M}])CO_[{M}].[{M}].[{M}]>>C(O[{M}])(CO[{M}])CO_[{M}].[{M}].[{M}H]	2.4123	56.0866
					C(O[{M}])(CO[{M}])CO_[{M}].[{M}].[{M}]>>C(O[{M}])(CO[{M}])(CO_[{M}])[{M}].[{M}H]	-54.992	46.1451
					C(O[{M}])(CO[{M}])(CO_[{M}])[{M}]>>C(C=O)(CO_[{M}])(O[{M}])[{M}].[{M}H]	-66.2759	34.6356
					C(C=O)(CO_[{M}])(O[{M}])[{M}].[{M}].[{M}]>>C(=O)(C(=O)CO_[{M}])[{M}].[{M}].[{M}].[{M}H]	5.28761	107.63
					C(=O)(C(=O)CO_[{M}])[{M}].[{M}].[{M}]>>C(=O)([{M}])[{M}].C(=O)(CO_[{M}])[{M}]	-130.403	67.2892
					C(=O)([{M}])[{M}]>>O=[C:].[{M}].[{M}]	112.836	0
					the above pathway is of length 8 and contains
					rule OHadsorption2 occurs 1 times
					rule CHscission occurs 1 times
					rule CHscission3 occurs 1 times
					rule CCscission occurs 1 times
					rule OHscission occurs 1 times
					rule OHscission2 occurs 1 times
					rule CdoubleOFormation occurs 1 times
					rule CarbonMonoxideFormation occurs 1 times
					Max Ea is			107.63
					C(CO)(CO)O.[{M}].[{M}]>>C(O_[{M}])(CO)CO_[{M}]	-52.1177	0
					C(O_[{M}])(CO)CO_[{M}].[{M}].[{M}]>>C(O[{M}])(CO_[{M}])CO_[{M}].[{M}H]	-28.2992	29.6747
					C(O[{M}])(CO_[{M}])CO_[{M}].[{M}].[{M}]>>C(O[{M}])(CO[{M}])CO_[{M}].[{M}].[{M}H]	-3.47436	51.0241
					C(O[{M}])(CO[{M}])CO_[{M}].[{M}].[{M}]>>C(O[{M}])(CO[{M}])(CO_[{M}])[{M}].[{M}H]	-54.992	46.1451
					C(O[{M}])(CO[{M}])(CO_[{M}])[{M}]>>C(C=O)(CO_[{M}])(O[{M}])[{M}].[{M}H]	-66.2759	34.6356
					C(C=O)(CO_[{M}])(O[{M}])[{M}].[{M}].[{M}]>>C(=O)(C(=O)CO_[{M}])[{M}].[{M}].[{M}].[{M}H]	5.28761	107.63
					C(=O)(C(=O)CO_[{M}])[{M}].[{M}].[{M}]>>C(=O)([{M}])[{M}].C(=O)(CO_[{M}])[{M}]	-130.403	67.2892
					C(=O)([{M}])[{M}]>>O=[C:].[{M}].[{M}]	112.836	0
					the above pathway is of length 8 and contains
					rule OHadsorption2 occurs 1 times
					rule CHscission occurs 1 times
					rule CHscission3 occurs 1 times
					rule CCscission occurs 1 times
					rule OHscission2 occurs 1 times
					rule OHscission4 occurs 1 times
					rule CdoubleOFormation occurs 1 times
					rule CarbonMonoxideFormation occurs 1 times
					Max Ea is			107.63
					C(CO)(CO)O.[{M}].[{M}]>>C(O_[{M}])(CO)CO_[{M}]	-52.1177	0
					C(O_[{M}])(CO)CO_[{M}].[{M}].[{M}]>>C(C(O_[{M}])CO_[{M}])([{M}])O.[{M}H]	-98.5564	1.70947
					C(C(O_[{M}])CO_[{M}])([{M}])O.[{M}].[{M}]>>C(C([{M}])O)(CO_[{M}])([{M}])O.[{M}].[{M}H]	-18.3939	83.4753
					C(C([{M}])O)(CO_[{M}])([{M}])O>>C(=O)(C([{M}])O)CO_[{M}].[{M}H]	18.1975	69.6619
					C(=O)(C([{M}])O)CO_[{M}].[{M}].[{M}]>>C(=O)(C(O[{M}])[{M}])CO_[{M}].[{M}H]	-12.7724	43.0277
					C(=O)(C(O[{M}])[{M}])CO_[{M}].[{M}].[{M}]>>C(=O)(C(=O)CO_[{M}])[{M}].[{M}].[{M}].[{M}H]	-36.2287	65.2838
					C(=O)(C(=O)CO_[{M}])[{M}].[{M}].[{M}]>>C(=O)([{M}])[{M}].C(=O)(CO_[{M}])[{M}]	-130.403	67.2892
					C(=O)([{M}])[{M}]>>O=[C:].[{M}].[{M}]	112.836	0
					the above pathway is of length 8 and contains
					rule OHadsorption2 occurs 1 times
					rule CHscission occurs 1 times
					rule CHscission2 occurs 1 times
					rule CHscission4 occurs 1 times
					rule CCscission occurs 1 times
					rule OHscission occurs 1 times
					rule CdoubleOFromCOH occurs 1 times
					rule CarbonMonoxideFormation occurs 1 times
					Max Ea is			83.4753
					C(CO)(CO)O.[{M}].[{M}]>>C(O_[{M}])(CO)CO_[{M}]	-52.1177	0
					C(O_[{M}])(CO)CO_[{M}].[{M}].[{M}]>>C(CO_[{M}])(CO_[{M}])([{M}])O.[{M}H]	-70.5188	30.3078
					C(CO_[{M}])(CO_[{M}])([{M}])O.[{M}].[{M}]>>C(C([{M}])O)(CO_[{M}])([{M}])O.[{M}].[{M}H]	-46.4315	54.8769
					C(C([{M}])O)(CO_[{M}])([{M}])O>>C(=O)(C([{M}])O)CO_[{M}].[{M}H]	18.1975	69.6619
					C(=O)(C([{M}])O)CO_[{M}].[{M}].[{M}]>>C(=O)(C(O[{M}])[{M}])CO_[{M}].[{M}H]	-12.7724	43.0277
					C(=O)(C(O[{M}])[{M}])CO_[{M}].[{M}].[{M}]>>C(=O)(C(=O)CO_[{M}])[{M}].[{M}].[{M}].[{M}H]	-36.2287	65.2838
					C(=O)(C(=O)CO_[{M}])[{M}].[{M}].[{M}]>>C(=O)([{M}])[{M}].C(=O)(CO_[{M}])[{M}]	-130.403	67.2892
					C(=O)([{M}])[{M}]>>O=[C:].[{M}].[{M}]	112.836	0
					the above pathway is of length 8 and contains
					rule OHadsorption2 occurs 1 times
					rule CHscission2 occurs 1 times
					rule CHscission4 occurs 1 times
					rule CHscission7 occurs 1 times
					rule CCscission occurs 1 times
					rule OHscission occurs 1 times
					rule CdoubleOFromCOH occurs 1 times
					rule CarbonMonoxideFormation occurs 1 times
					Max Ea is			69.6619
					C(CO)(CO)O.[{M}].[{M}]>>C(O_[{M}])(CO)CO_[{M}]	-52.1177	0
					C(O_[{M}])(CO)CO_[{M}].[{M}].[{M}]>>C(C(O_[{M}])CO_[{M}])([{M}])O.[{M}H]	-98.5564	1.70947
					C(C(O_[{M}])CO_[{M}])([{M}])O.[{M}].[{M}]>>C(C([{M}])O)(CO_[{M}])O[{M}].[{M}].[{M}H]	2.4123	56.0866
					C(C([{M}])O)(CO_[{M}])O[{M}]>>C(=O)(C([{M}])O)CO_[{M}].[{M}H]	-2.60866	99.5762
					C(=O)(C([{M}])O)CO_[{M}].[{M}].[{M}]>>C(=O)(C(O[{M}])[{M}])CO_[{M}].[{M}H]	-12.7724	43.0277
					C(=O)(C(O[{M}])[{M}])CO_[{M}].[{M}].[{M}]>>C(=O)(C(=O)CO_[{M}])[{M}].[{M}].[{M}].[{M}H]	-36.2287	65.2838
					C(=O)(C(=O)CO_[{M}])[{M}].[{M}].[{M}]>>C(=O)([{M}])[{M}].C(=O)(CO_[{M}])[{M}]	-130.403	67.2892
					C(=O)([{M}])[{M}]>>O=[C:].[{M}].[{M}]	112.836	0
					the above pathway is of length 8 and contains
					rule OHadsorption2 occurs 1 times
					rule CHscission occurs 1 times
					rule CHscission4 occurs 1 times
					rule CCscission occurs 1 times
					rule OHscission occurs 1 times
					rule OHscission2 occurs 1 times
					rule CdoubleOFormation occurs 1 times
					rule CarbonMonoxideFormation occurs 1 times
					Max Ea is			99.5762
					C(CO)(CO)O.[{M}].[{M}]>>C(O_[{M}])(CO)CO_[{M}]	-52.1177	0
					C(O_[{M}])(CO)CO_[{M}].[{M}].[{M}]>>C(O[{M}])(CO_[{M}])CO_[{M}].[{M}H]	-28.2992	29.6747
					C(O[{M}])(CO_[{M}])CO_[{M}].[{M}].[{M}]>>C(C([{M}])O)(CO_[{M}])O[{M}].[{M}].[{M}H]	-67.8449	33.0352
					C(C([{M}])O)(CO_[{M}])O[{M}]>>C(=O)(C([{M}])O)CO_[{M}].[{M}H]	-2.60866	99.5762
					C(=O)(C([{M}])O)CO_[{M}].[{M}].[{M}]>>C(=O)(C(O[{M}])[{M}])CO_[{M}].[{M}H]	-12.7724	43.0277
					C(=O)(C(O[{M}])[{M}])CO_[{M}].[{M}].[{M}]>>C(=O)(C(=O)CO_[{M}])[{M}].[{M}].[{M}].[{M}H]	-36.2287	65.2838
					C(=O)(C(=O)CO_[{M}])[{M}].[{M}].[{M}]>>C(=O)([{M}])[{M}].C(=O)(CO_[{M}])[{M}]	-130.403	67.2892
					C(=O)([{M}])[{M}]>>O=[C:].[{M}].[{M}]	112.836	0
					the above pathway is of length 8 and contains
					rule OHadsorption2 occurs 1 times
					rule CHscission2 occurs 1 times
					rule CHscission4 occurs 1 times
					rule CCscission occurs 1 times
					rule OHscission occurs 1 times
					rule OHscission4 occurs 1 times
					rule CdoubleOFormation occurs 1 times
					rule CarbonMonoxideFormation occurs 1 times
					Max Ea is			99.5762
					C(CO)(CO)O.[{M}].[{M}]>>C(O_[{M}])(CO)CO_[{M}]	-52.1177	0
					C(O_[{M}])(CO)CO_[{M}].[{M}].[{M}]>>C(CO_[{M}])(CO_[{M}])([{M}])O.[{M}H]	-70.5188	30.3078
					C(CO_[{M}])(CO_[{M}])([{M}])O.[{M}].[{M}]>>C(O[{M}])(CO_[{M}])(CO_[{M}])[{M}].[{M}H]	-12.7724	43.0277
					C(O[{M}])(CO_[{M}])(CO_[{M}])[{M}].[{M}].[{M}]>>C(=O)(C([{M}])O)CO_[{M}].[{M}].[{M}].[{M}].[{M}H]	-15.4615	86.4663
					C(=O)(C([{M}])O)CO_[{M}].[{M}].[{M}]>>C(=O)(C(O[{M}])[{M}])CO_[{M}].[{M}H]	-12.7724	43.0277
					C(=O)(C(O[{M}])[{M}])CO_[{M}].[{M}].[{M}]>>C(=O)(C(=O)CO_[{M}])[{M}].[{M}].[{M}].[{M}H]	-36.2287	65.2838
					C(=O)(C(=O)CO_[{M}])[{M}].[{M}].[{M}]>>C(=O)([{M}])[{M}].C(=O)(CO_[{M}])[{M}]	-130.403	67.2892
					C(=O)([{M}])[{M}]>>O=[C:].[{M}].[{M}]	112.836	0
					the above pathway is of length 8 and contains
					rule OHadsorption2 occurs 1 times
					rule CHscission4 occurs 1 times
					rule CHscission5 occurs 1 times
					rule CHscission7 occurs 1 times
					rule CCscission occurs 1 times
					rule OHscission occurs 2 times
					rule CarbonMonoxideFormation occurs 1 times
					Max Ea is			86.4663
					C(CO)(CO)O.[{M}].[{M}]>>C(O_[{M}])(CO)CO_[{M}]	-52.1177	0
					C(O_[{M}])(CO)CO_[{M}].[{M}].[{M}]>>C(O[{M}])(CO_[{M}])CO_[{M}].[{M}H]	-28.2992	29.6747
					C(O[{M}])(CO_[{M}])CO_[{M}].[{M}].[{M}]>>C(O[{M}])(CO_[{M}])(CO_[{M}])[{M}].[{M}H]	-54.992	46.1451
					C(O[{M}])(CO_[{M}])(CO_[{M}])[{M}].[{M}].[{M}]>>C(=O)(C([{M}])O)CO_[{M}].[{M}].[{M}].[{M}].[{M}H]	-15.4615	86.4663
					C(=O)(C([{M}])O)CO_[{M}].[{M}].[{M}]>>C(=O)(C(O[{M}])[{M}])CO_[{M}].[{M}H]	-12.7724	43.0277
					C(=O)(C(O[{M}])[{M}])CO_[{M}].[{M}].[{M}]>>C(=O)(C(=O)CO_[{M}])[{M}].[{M}].[{M}].[{M}H]	-36.2287	65.2838
					C(=O)(C(=O)CO_[{M}])[{M}].[{M}].[{M}]>>C(=O)([{M}])[{M}].C(=O)(CO_[{M}])[{M}]	-130.403	67.2892
					C(=O)([{M}])[{M}]>>O=[C:].[{M}].[{M}]	112.836	0
					the above pathway is of length 8 and contains
					rule OHadsorption2 occurs 1 times
					rule CHscission occurs 1 times
					rule CHscission4 occurs 1 times
					rule CHscission5 occurs 1 times
					rule CCscission occurs 1 times
					rule OHscission occurs 1 times
					rule OHscission4 occurs 1 times
					rule CarbonMonoxideFormation occurs 1 times
					Max Ea is			86.4663
					C(CO)(CO)O.[{M}].[{M}]>>C(O_[{M}])(CO)CO_[{M}]	-52.1177	0
[truncated: 839 more rows]

## Sheet: Ru
This is the output from RING for pathways query. All reactions in a pathway are given together and all pathways are given one below the other. The second column is the enthalpy of reaction, and the third column is the activation barriers. The Max Ea in the pathway is given in the fourth
[truncated: 1,771 more rows]

[truncated: 3 more sheets: AltScalingPd, AltScalingRh, AltScalingRu]
